# Supplementary material for: Proteomic analysis of serum small extracellular vesicles identifies diagnostic biomarkers for neuroblastoma
Source: Front Oncol. 2024 Aug 20;14:1367159. doi: 10.3389/fonc.2024.1367159 (PMC11368728; doi:10.3389/fonc.2024.1367159)
Supplement: Supplementary Table 1 — Clinical characteristics of the participants. Histologic category of neuroblastoma (NB) is based on International Neuroblastoma Pathology Classification (INPC)(1). One female NB patient could not be classified because her primary tumor tissue was not obtained. [file Table1.xlsx]

## Sheet: Supplementary Table 1
	Discovery			Validation
	NB	HC	P value	NB	HC	Non-NB	P value(NB vs HC)	P value(NB vs Non-NB)
Number, n	10	10		20	20	10
Age (month)	53(37.5-97.5)	60(48-114)	0.35	46(20.5-73.5)	38.5(23.75-72)	106.5(99.5-133.5)	0.94	0.0003
Sex, Female/Male, n	8/2	6/4	0.63	12/8	11/9	5/5	1	0.71
Diagnostic category, n
NB	6			14
GNB, nodular	1			1
GNB, intermixed	2			4
GN				1
pilomatricoma						4
mucinous cystadenoma						1
hepatoblastoma						1
Hodgkin lymphoma						1
Teratoma						2
unknown	1					1
Data are expressed as n or median (25–75% interquartile range). The statistical significance of the clinical categorical variables and continuous variables was determined using Fisher’s exact test and Mann-Whitney U test, respectively. unknown: No tissue from the primary tumor was obtained.
Abbreviations: NB, Neuroblastoma; GNB, Ganglioneuroblastoma; GN: Ganglioneuroma; HC: Healthy control.
	Clinical characteristics of patients with neuroblastoma				Clinical characteristics of healthy controls			Clinical characteristics of non-NB patients
	ID	Gender	Age(month)	Histologic category	ID	Gender	Age(month)	ID	Gender	Age(month)	Diagnostic category
Discovery cohort	T5	Female	121	NB	HC1	Male	111
	T6	Female	35	NB	HC2	Female	92
	T8	Female	136	GNB, intermixed; FH	HC3	Male	43
	T12	Male	79	NB; UFH	HC5	Male	77
	T13	Female	104	GNB, nodular; UFH	HC6	Female	80
	T14	Female	48	GNB, intermixed; FH	HC7	Female	38
	T15	Female	28	NB	HC8	Male	42
	T16	Female	45	NB	HC9	Female	12
	T17	Male	58	NB	HC10	Female	56
	T19	Female	3	unknown	HC13	Male	10
Validation cohort	S7	Male	137	NB	S104	Male	8	S1	Male	110	pilomatricoma
	S22	Female	39	GNB, nodular; UFH	S105	Male	89	S2	Female	149	mucinous cystadenoma
	S23	Female	97	GNB, intermixed; FH	S106	Male	146	S3	Male	132	pilomatricoma
	S29	Male	79	NB; UFH	S108	Female	36	S5	Male	52	hepatoblastoma
	S35	Female	18	NB; UFH	S110	Female	41	S6	Female	134	teratoma
	S42	Female	72	NB	S112	Male	19	S10	Male	101	pilomatricoma
	S45	Male	22	NB; UFH	S113	Male	24	S12	Female	99	unknown
	S57	Female	67	NB; UFH	S114	Female	24	S14	Female	103	Hodgkin lymphoma
	S59	Female	32	GNB, intermixed; FH	S115	Female	23	S15	Male	99	pilomatricoma
	S62	Male	19	NB; UFH	S116	Female	10	S24	Female	145	teratoma
	S63	Female	44	GNB, intermixed; FH	S117	Female	96
	S67	Female	32	NB	S172	Female	25
	S88	Male	96	NB; FH	S173	Male	53
	S94	Female	94	NB; UFH	S175	Male	56
	S96	Female	100	NB; UFH	S176	Female	29
	S97	Female	52	GN	S178	Female	118
	S129	Male	48	NB	S179	Female	80
	S133	Male	72	NB; FH	S182	Male	78
	S139	Male	87	NB	S184	Male	11
	S150	Female	53	GNB, intermixed; FH	S185	Female	80
Note. Histologic category is based on International Neuroblastoma Pathology Classification (INPC). unknown: No tissue from the primary tumor was obtained.
Abbreviations: NB, Neuroblastoma; GNB, Ganglioneuroblastoma; GN: Ganglioneuroma. FH: favorable histology; UFH: unfavorable histology.

## Sheet: Supplementary Table 2
Sequence	Modifications	Qvality PEP	Qvality q-value	# Protein Groups	# Proteins	# PSMs	Master Protein Accessions	Positions in Master Proteins	Modifications in Master Proteins	# Missed Cleavages	Theo. MH+ [Da]	Abundances (Normalized): 1	Abundances (Normalized): 2	Abundances (Normalized): 3	Abundances (Normalized): 5	Abundances (Normalized): 6	Abundances (Normalized): 7	Abundances (Normalized): 8	Abundances (Normalized): 9	Abundances (Normalized): 10	Abundances (Normalized): 13	Abundances (Normalized): T5	Abundances (Normalized): T6	Abundances (Normalized): T8	Abundances (Normalized): T12	Abundances (Normalized): T13	Abundances (Normalized): T14	Abundances (Normalized): T15	Abundances (Normalized): T16	Abundances (Normalized): T17	Abundances (Normalized): T19	Abundance: 1	Abundance: 2	Abundance: 3	Abundance: 5	Abundance: 6	Abundance: 7	Abundance: 8	Abundance: 9	Abundance: 10	Abundance: 13	Abundance: T5	Abundance: T6	Abundance: T8	Abundance: T12	Abundance: T13	Abundance: T14	Abundance: T15	Abundance: T16
AAAATGTIFTFR		7.19959e-05	0.000276662	1	1	8	P05154	P05154 [362-373]		0	1226.65	228308	439317	407943												688110	463121	189903			296913	50230.9	122054	258451												117000	422957	102015
ITCMNPSAYQR	1xCarbamidomethyl [C3]	0.000822988	0.000276662	1	1	9	P13611	P13611 [3350-3360]		0	1340.61	1.00506e+06	1.02289e+06	291393	1.18873e+06	905747	1.37278e+06	1.56329e+06	1.79917e+06	740972	1.14612e+06	56482.9	1.30159e+06	3.25849e+06	2.55804e+06	937213	2.92303e+06	1.34077e+06		2.39494e+06	5.16003e+06	221126	284186	184611	138887	270340	177568	616155	570612	255010	420465	2138.52	354466	550096	323323	159355	2.66953e+06	720256
ITCMNPSAYQR	1xCarbamidomethyl [C3]; 1xOxidation [M4]	6.46938e-09	0.000276662	1	1	5	P13611	P13611 [3350-3360]		0	1356.6	1.04601e+06	545162	139871	1.04263e+06	307873	1.70197e+06	500881	1.3991e+06	310437	502193		513004		1.50486e+06	714722	626325	363892	3.53289e+06	858425	2.4078e+06	230136	151460	88614.7	121818	91891.3	220149	197417	443727	106839	184234		139708		190207	121525	572007	195481	1.60092e+06
ITCQGDSLR	1xCarbamidomethyl [C3]	0.00106863	0.000276662	1	1	34	P01714	P01714 [39-47]		0	1049.5	1.27054e+07	1.81037e+07	9.22314e+06	2.54158e+07	3.18935e+07	1.57945e+07	1.02153e+07	5.96262e+07	1.09425e+07	2.03278e+07	5.86884e+06	2.13449e+07	2.01672e+07	1.76938e+07	3.42874e+07	1.59694e+07	1.28568e+07	1.47388e+07	3.47964e+07	3.10584e+07	2.79537e+06	5.02967e+06	5.84328e+06	2.9695e+06	9.5193e+06	2.04301e+06	4026258	1.89106e+07	3.76593e+06	7.45743e+06	222202	5.8129e+06	3.40461e+06	2.2364e+06	5.82992e+06	1.45845e+07	6.9066e+06	6678841
ITCSGDVLAK	1xCarbamidomethyl [C3]	0.000134677	0.000276662	1	1	12	P01718	P01718 [39-48]		0	1063.55	7.73358e+06	7.70369e+06	1.52123e+06	1.13998e+07	9.91902e+06	1.27165e+07	1.18958e+07	6.33416e+06	3.22515e+06	3.1901e+07		3.34331e+06	5.01349e+06	2.04848e+06	6.20808e+06	2.59102e+07	6.23669e+06	199255	4.93455e+06	1.14271e+07	1.70149e+06	2.14028e+06	963766	1.33192e+06	2.96054e+06	1.64488e+06	4688623	2.00889e+06	1109952	11703183		910491	846373	258917	1.05557e+06	23663158	3.35031e+06	90291.7
ITCSGEALPK	1xCarbamidomethyl [C3]	6.29278e-05	0.000276662	1	1	5	A0A075B6K0	A0A075B6K0 [39-48]		0	1075.55	207345		3.76447e+06	919245	813907			290105	88309.9	112843		1.79519e+06		123312	6.39902e+06	4.91595e+06	88514.1	291691	801428	5.07349e+06	45618.9		2.38497e+06	107402	242928			92007.6	30392.4	41397.4		488889		15585.9	1.08803e+06	4.48961e+06	47549.3	132179
ITCTEEGWSPTPK	1xCarbamidomethyl [C3]	2.74423e-15	0.000276662	2	2	12	Q9BXR6; Q03591	Q9BXR6 [70-82]; Q03591 [70-82]		0	1505.69	241843	399315	337528	476650	469790	544754	2.10656e+06	1.32474e+06	925046	902861		2.19937e+06			622365	1.13096e+06	428590	480371	996524	783839	53208.9	110940	213840	55690.2	140219	70463.7	830278	420143	318360	331223		598959			105821	1032881	230236	217679
LTCTLSSGHSSYAIAWHQQQPEK	1xCarbamidomethyl [C3]	2.03402e-32	0.000276662	1	1	12	A0A075B6H9	A0A075B6H9 [40-62]		0	2629.25			3.55401e+06		3.23642e+06	990085	5.11654e+06	5.17303e+06		2.66477e+06		1.55865e+06			1.58227e+06	4.57974e+06	1.72215e+06	3.82961e+06	2.73955e+07	1.20069e+06			2.25163e+06		965980	128067	2.01663e+06	1.64064e+06		977597		424470			269035	4.18256e+06	925129	1.73538e+06
LTCTLSSGHSSYAIAWHQQQPEKGPR	1xCarbamidomethyl [C3]	8.42235e-10	0.000276662	1	1	1	A0A075B6H9	A0A075B6H9 [40-65]		1	2939.42
ITDNMFCAGYKPDEGK	1xCarbamidomethyl [C7]	3.4443e-13	0.000276662	1	1	4	P00734	P00734 [544-559]		0	1845.81		276629						369245		249838		589988			318023					305311		76854.7						117107		91655.5		160673			54073.7
ITDNMFCAGYKPDEGK	1xCarbamidomethyl [C7]; 1xOxidation [M5]	1.59415e-13	0.000276662	1	1	9	P00734	P00734 [544-559]		0	1861.81	223849	434940	643168	466509	458706	555701	895660	1.22767e+06	735790	1.23387e+06	132542	1.60855e+06	613705	644586	2.01582e+06	1.35498e+06	854056		785249	1.5015e+06	49250	120838	407477	54505.4	136911	71879.6	353015	389359	253226	452656	5018.23	438061	103605	81472.4	342752	1.23747e+06	458794
ITDNMFCAGYKPDEGKR	1xCarbamidomethyl [C7]	4.20393e-29	0.000276662	1	1	22	P00734	P00734 [544-560]		1	2001.92	997483	3.15693e+06	1.59614e+06	1.24846e+06	1.62318e+06	949011	3.23923e+06	5.05801e+06	2.33651e+06	3.81309e+06		3.47273e+06	271311	1.51926e+06	3.77992e+06	1.11379e+07	5.27436e+06	3.72129e+06	7.08509e+06	5.63295e+06	219460	877076	1.01123e+06	145866	484473	122754	1.27671e+06	1.60416e+06	804123	1.39887e+06		945737	45802.4	192027	642703	10171917	2.83335e+06	1.68629e+06
ITDNMFCAGYKPDEGKR	1xCarbamidomethyl [C7]; 1xOxidation [M5]	9.59096e-21	0.000276662	1	1	9	P00734	P00734 [544-560]		1	2017.91	790911	2.33022e+06	810855	2.49385e+06	855693	1.42677e+06	2.01501e+06	2.77684e+06	1.75325e+06	2.95585e+06		3.04352e+06	149811	1.38343e+06	5.01556e+06	3.07277e+06	2.15691e+06	1.33913e+06	2.49137e+06	4.12554e+06	174011	647396	513714	291374	255400	184552	794195	880680	603389	1.08438e+06		828848	25291	174858	852801	2.80628e+06	1.15868e+06	606825
LTDPNSAFSR		0.000443103	0.000276662	1	1	3	Q9HC84	Q9HC84 [625-634]		0	1107.54		455373	3.35553e+06	701224	2.22741e+06	358752		541967	339754	636595		523357	1.43079e+06	723424	3.21026e+06	2.97142e+06	446567		681670	376833		126514	2.12588e+06	81928.8	664819	46404.4		171886	116928	233541		142527	241544	91437.1	545843	2.71372e+06	239893
ITEAEKNER		7.86822e-05	0.000276662	1	1	6	P15311	P15311 [518-526]		1	1089.55	510544	944004	313819	861847	527042	2.22375e+06	1.00443e+06	1.9604e+06	1.79707e+06	572185	490448	781050	760829	512680	523908		580208	1.10456e+06	1751.54	2.21505e+06	112327	262269	198819	100695	157307	287640	395885	621746	618472	209911	18569	212705	128442	64800.1	89080.6		311685	500529
ITENDIQIALDDAK		6.0599e-19	0.000276662	1	1	32	P04114	P04114 [2151-2164]		0	1558.8	4.44645e+07	3.80783e+07	1.37629e+08	5.16192e+06	1.78571e+07	3.90732e+06	2.83637e+07	3.52929e+07	5.79795e+07	4.24455e+07		8.65486e+07	2.23775e+07	4.41923e+07	1.47772e+07	1.18787e+08	6.61342e+07		62010054	1.85823e+07	9.78281e+06	1.05791e+07	87193980	603102	5.32982e+06	505410	1.11793e+07	1.11932e+07	1.9954e+07	15571524		2.357e+07	3.77776e+06	5.58568e+06	2.51258e+06	1.08485e+08	3.55269e+07
ITESEEVVSR		7.04067e-05	0.000276662	1	1	6	P02545	P02545 [63-72]		0	1148.58	736615	345915		872297	295275	837900	381179	208012	201154	180541		1.23407e+06	857678	758659	332029	91064.7	147764			306600	162066	96104		101916	88131	108382	150238	65971.4	69228.4	66233.3		336077	144792	95890.6	56455.3	83167.1	79377.9
ITEVALMGHLSCDTK	1xCarbamidomethyl [C12]	3.95621e-23	0.000276662	1	1	23	P04114	P04114 [1101-1115]		0	1674.82	1.54949e+07	1.53803e+07	6.21389e+07	5.80485e+06	1.05615e+07	2.64706e+06	3.74768e+07	3.29668e+07	4.35908e+07	3.20787e+07		5.3343e+07	2.82757e+07	1.69395e+07	1.94389e+07	1.77075e+08	4.31558e+07	9.84185e+06	7.88576e+07	1.64493e+07	3.40909e+06	4.27305e+06	3.93679e+07	678219	3152297	342396	14771090	10455489	15002021	11768376		14527011	4.77348e+06	2141070	3.30522e+06	1.61718e+08	2.31831e+07	4.45981e+06
LTIFKTELR		0.00076253	0.000276662	1	1	3	P04114	P04114 [4036-4044]		1	1120.67		517770	596179					418998	809247							1.56972e+06	330960		443722			143850	377707					132886	278507							1.43358e+06	177790
ITHYNYLILSK		0.000886807	0.000276662	1	1	1	P01031	P01031 [496-506]		0	1364.76
ITHLVPGTFNHLESMK		1.41421e-09	0.000276662	1	1	2	Q92626	Q92626 [170-185]		0	1823.95											244535					169663	61551.3		394916												9258.44					154949	33065
LTGSCSYVLFQNK	1xCarbamidomethyl [C5]	2.01647e-15	0.000276662	1	1	69	P04275	P04275 [1968-1980]		0	1516.75	5.44202e+07	4.77149e+07	2.46063e+07	1.27261e+07	7.36776e+07	5.34619e+07	4.27225e+07	5.93884e+07	8.75856e+07	1.30405e+08		5.374e+07	3.8463e+07	4.77469e+07	5.35847e+07	9.52441e+07	3.74372e+07	1.086e+08	86858048	5.52501e+07	1.19732e+07	1.32564e+07	1.55892e+07	1.48688e+06	21990647	6.91527e+06	1.68386e+07	18835161	30143052	4.78404e+07		14635145	6.49329e+06	6.03497e+06	9.11105e+06	86984012	20111043	4.92119e+07
LTGPIQVIHLAK		0.00114467	0.000276662	1	1	4	O15117	O15117 [506-517]		0	1289.79		499712	168213		701120	399154	887334	1.68352e+06	1.04382e+06	364223		1.0011e+06	2.15682e+06	2.09315e+06	1.85527e+06	268266	753670		237583	1.85896e+06		138833	106571		209264	51630.4	349733	533932	359237	133619		272633	364112	264564	315454	245000	404867
ITGFLKPGK		0.000913283	0.000276662	1	1	2	P18428	P18428 [398-406]		0	960.588															134656	3.15097e+06	79560.5		156671	124521															22895.7	2877703	42739.5
ITCGGNNIGSK	1xCarbamidomethyl [C3]	3.57732e-06	0.000276662	1	3	14	P80748	P80748 [39-49]		0	1120.54	4.43992e+06	2.20055e+06	3.98919e+06	1.58966e+07	2.52014e+06	4.61987e+06	5.70246e+06	2.51679e+06	2.14442e+06	4.92591e+06	9.45247e+06	1.89395e+06	2.25899e+07	1.99976e+06	2.40991e+06	8.4544e+06	3.82233e+06	2.69773e+06	6.19496e+06	9.78011e+07	976844	611371	2.52734e+06	1.85731e+06	752190	597578	2.24757e+06	798205	738014	1.80712e+06	357884	515784	3.81361e+06	252759	409759	7.72119e+06	2.05333e+06	1222471
ITGAQVGTGCGTLNDGK	1xCarbamidomethyl [C10]	1.07362e-15	0.000276662	1	1	5	P78509	P78509 [1465-1481]		0	1648.8	63195.3		86037.8	154963		96881.6	118189	210758	138138	213717		299381		436477	154948	1.05444e+06	157246	1.31103e+06	558088	581186	13903.8		54508.9	18105.4		12531.6	46582.9	66842.2	47541	78404.3		81531.1		55168.5	26346	962993	84471.6	594088
LTFINDLCGPR	1xCarbamidomethyl [C8]	0.000308901	0.000276662	1	1	8	Q16610	Q16610 [466-476]		0	1305.66	295294	968697	245067	809074	801794	1.05572e+06	711500	565400	654487	756592	305001	671672	679339	376938	456774	482117	264153		278320	1.09079e+06	64968.9	269129	155261	94529.5	239313	136557	280430	179318	225245	277563	11547.8	182918	114685	47643.1	77665.7	440305	141902
ITFDDYIACCVK	2xCarbamidomethyl [C9; C10]	3.03936e-08	0.000276662	1	1	2	P30626	P30626 [154-165]		0	1504.68		396032	101649	1.05597e+06				636560				778631		134507		215107		147204	266879			110028	64399	123376				201887				212047		17001		196452		66705
ITEVTSEGFR		0.000102231	0.000276662	1	1	2	Q99715	Q99715 [1663-1672]		0	1138.57	126990	171209	26665.1	72023	64091.4	180581	102688	593051	100415	213060		91894.9		177380	151197		489381	414582	576140	276264	27939.5	47566.3	16893.6	8414.93	19129.4	23358	40473.2	188088	34558.5	78163.2		25026		22419.9	25708.2		262893	187867
ITEVALMGHLSCDTKEER	1xCarbamidomethyl [C12]; 1xOxidation [M7]	2.84623e-05	0.000276662	1	1	1	P04114	P04114 [1101-1118]		1	2105
ITEVALMGHLSCDTKEER	1xCarbamidomethyl [C12]	1.69269e-24	0.000276662	1	1	5	P04114	P04114 [1101-1118]		1	2089.01																1.30184e+06	467976		815846																	1.18894e+06	251394
ITEVALMGHLSCDTK	1xCarbamidomethyl [C12]; 1xOxidation [M7]	0.00192659	0.000276662	1	1	1	P04114	P04114 [1101-1115]		0	1690.81	146084	153873	583889				260027	160816	364224	200029		632000			380150	242327	399123		475914	176024	32140.4	42749.8	369921				102487	51003.2	125350	73382.4		172114			64637.3	221311	214407
ITFMCNDHYILK	1xCarbamidomethyl [C5]; 1xOxidation [M4]	3.00351e-11	0.000276662	1	1	16	P20851	P20851 [103-114]		0	1570.74	7.04981e+06	1.24951e+07	9.43752e+06	1.13922e+07	1.51523e+07	1.10291e+07	1.06633e+07	3.37217e+07	1.19569e+07	1.46303e+07		6.24056e+06	4.9489e+06	5.28974e+06	1.67512e+07	6.28971e+06	2.5258e+06	5.67322e+06	10800647	7.08242e+06	1.55106e+06	3.47146e+06	5.9791e+06	1.33103e+06	4.52251e+06	1.42661e+06	4.20281e+06	1.06949e+07	4.11505e+06	5.36727e+06		1.69951e+06	835468	668597	2.84822e+06	5744235	1.35685e+06	2.57081e+06
ITAQGQYELR		6.92258e-10	0.000276662	1	1	16	P24821	P24821 [2064-2073]		0	1178.62	6.03309e+06	5.88855e+06	2.33223e+06	1.46823e+07	5.29211e+06	5.34632e+06	3.89687e+06	1.28625e+07	5.51132e+06	4.38954e+06		4.69428e+06	8.20697e+06	5.67767e+06	2.33576e+07	2.84786e+06	5.83882e+06	8.36086e+06	3.20165e+06	1.08015e+07	1.32736e+06	1.63599e+06	1.47758e+06	1.71544e+06	1.57954e+06	691543	1.53591e+06	4.07938e+06	1.89675e+06	1.61035e+06		1.2784e+06	1.38549e+06	717629	3.97151e+06	2.60088e+06	3136584	3.7887e+06
ITAIITQGCK	1xCarbamidomethyl [C9]	1.81399e-11	0.000276662	1	1	10	P12259	P12259 [2133-2142]		0	1104.61	384815	2.52972e+06	1.45818e+06	231878	753889	734444	6.40388e+06	1.1816e+06	2.93638e+06	2.32935e+06		2.3684e+06	1.32688e+06	1.29315e+06	612477	1.34774e+06	1.45086e+06		3.03682e+06	1.37157e+06	84664.6	702820	923822	27091.9	225014	94999.9	2.52402e+06	374748	1.01057e+06	854544		644991	224003	163448	104140	1.23086e+06	779396
LSYTCEGGFR	1xCarbamidomethyl [C5]	1.36636e-06	0.000276662	1	1	19	P08603	P08603 [897-906]		0	1189.53	901280	1.8539e+06	799263	9.40742e+06	2.14464e+06	1.08838e+07	2.54585e+06	5.99008e+06	1.43791e+06	4.89035e+06		2.68418e+06	2.21828e+06	1.47178e+06	1.81266e+06	770630	2.44857e+06	2.12515e+06	2.50007e+06	3.09801e+06	198294	515060	506369	1.09913e+06	640115	1.40781e+06	1.00342e+06	1.89977e+06	494866	1.79407e+06		730989	374489	186026	308208	703796	1.31536e+06	963007
LSNRPAFMPSEGR		1.32864e-06	0.000276662	1	1	5	P12814	P12814 [347-359]		0	1461.73	143108	210812		125152	103904		291849	197898	157403	157655		385874	2.03609e+06	1.08873e+06	305688	440905	313007		625085	480043	31485.7	58569		14622.3	31012.4		115029	62763.7	54171.1	57837.4		105086	343731	137609	51976.5	402667	168146
LSNENHGIAQR		5.80149e-11	0.000276662	1	1	10	P19823	P19823 [465-475]		0	1238.62	1.11489e+06		1.26309e+06	574572	1.44016e+06	1.19543e+06	2.54896e+06	1.91126e+06	1.14165e+06	1.8953e+06		655268	1.1605e+06	635610	847621	1.54584e+06	1.80149e+06		1.48827e+06	3.08317e+06	245292		800225	67131.1	429848	154628	1.00464e+06	606161	392904	695309		178451	195914	80337.9	144122	1.41178e+06	967750
LSNDMMGSYAEMK	2xOxidation [M6; M]	7.98159e-13	0.000276662	1	1	18	P04114	P04114 [1738-1750]		0	1508.61	1.65111e+06	619199	2.27032e+06				2.1226e+06	1.98582e+06	1.85525e+06	1.49746e+06		3.62698e+06	1.2985e+06	3.39314e+06	2.63899e+06	1.24902e+07	4.81088e+06	356395	6.55724e+06	2.49624e+06	363268	172029	1.43835e+06				836600	629808	638495	549359		987745	219211	428876	448711	1.1407e+07	2.58438e+06	161500
LSNDMMGSYAEMK	1xOxidation [M]	7.73699e-15	0.000276662	1	1	19	P04114	P04114 [1738-1750]		0	1492.61	2.37747e+06	1.42944e+06	2.63529e+06		324493		3.40949e+06	3.35524e+06	1.91717e+06	1.3224e+06		4.81322e+06	1.82758e+06	2.09488e+06	1.38327e+06	1.8566e+07	8.04735e+06	816533	9.62818e+06	1.43464e+06	523076	397134	1.66958e+06		96851.9		1.34382e+06	1.06412e+06	659803	485135		1.3108e+06	308530	264782	235198	1.69559e+07	4.32299e+06	370010
LSNDMMGSYAEMK		3.79625e-18	0.000276662	1	1	11	P04114	P04114 [1738-1750]		0	1476.62	1.3121e+06	747572	1.82942e+06		638887		2.6958e+06	2.36109e+06	1.03598e+06	1.11787e+06		4.05719e+06	5.50753e+06	894990	578324	1.25859e+07	5.18309e+06	926313	9733047	576254	288681	207695	1.15902e+06		190689		1.06252e+06	748826	356539	410100		1.1049e+06	929776	113122	98333	11494418	2.78433e+06	419756
LSMDGSPTR		0.00182501	0.000276662	1	1	4	P03952	P03952 [351-359]		0	963.456	406775	611867	602180	60548.3		62349.5	2.06651e+06	922959	1.58636e+06	1.34986e+06		3.87366e+06	136895	598324	9.171e+06	3.87061e+06	1.58986e+06		1.19894e+06	880776	89496.3	169993	381509	7074.27		8064.87	814493	292719	545956	495209		1.05492e+06	23110.4	75625.1	1.55935e+06	3534925	854064
LSNVLQQVK		1.48582e-06	0.000276662	1	1	22	P04114	P04114 [2377-2385]		0	1028.61	1.55768e+08	9.91407e+07	4.36688e+08	1.05998e+07	4.17523e+07	8.76969e+06	9.27765e+07	7.78474e+07	1.7924e+08	6.77757e+07		1.83811e+08	3.0727e+08	3.33551e+08	3.51288e+07	3.79384e+08	1.85309e+08	3.43349e+07	134292272	5.05492e+07	34271152	2.75439e+07	2.76662e+08	1.23845e+06	12461867	1.13435e+06	36566872	24689496	61686552	24864152		50057768	51873016	42159160	5.97298e+06	3.46482e+08	9.9547e+07	15558771
LSLTDPLVAER		1.07042e-07	0.000276662	1	1	3	P13224	P13224 [190-200]		0	1213.68	173910	430181	370254		508161		637874	859352	527935	465978		3.94734e+06		7.284e+06	583492	1.56309e+06			1471209	1.62015e+06	38262.7	119516	234573		151672		251411	272545	181692	170949		1.07499e+06		920661	99211.6	1.42753e+06
LSINTHPSQKPLSITVR		5.70771e-26	0.000276662	1	1	24	P01024	P01024 [409-425]		0	1891.08	826223	1.80104e+06	3.6205e+06	3.74436e+06	2.45703e+06	870271	5.69533e+06	3.93696e+06	4.18962e+06	4.36721e+06	130809	3.00982e+06	1.18499e+06	1.38004e+06	2.49882e+06	7.05907e+06	4.9149e+06	3.95463e+06	6.46354e+06	2.80509e+06	181780	500375	2.29375e+06	437478	733353	112569	2.24475e+06	1.24862e+06	1.44188e+06	1.60215e+06	4952.61	819672	200048	174431	424876	6.44687e+06	2.64025e+06	1.79203e+06
LSLNIDPDAK		5.63469e-06	0.000276662	1	1	2	P14625	P14625 [745-754]		0	1085.58	134615	92942.7						475073		372236		549569	36281.1	270103	167250	406699	303412	300382	270724		29617.2	25821.9						150670		136558		149665	6124.95	34139.6	28437.7	371428	162991	136117
ISIGGGSCAISGGYGSR	1xCarbamidomethyl [C8]	2.38377e-20	0.000276662	3	3	17	P04259; P02538; P48668	P04259 [70-86]; P02538 [70-86]; P48668 [70-86]		0	1598.76	4.09674e+06	966410	1.46157e+06	1.00314e+06	2.05395e+06	7.83388e+06	4.30506e+06	494628	1.16205e+06	933677		379890	5.53542e+06	6.12938e+06	1.73339e+06	181493	7.29688e+06	81153.4	394163	1.3709e+06	901339	268494	925969	117204	613044	1.01331e+06	1.69679e+06	156872	399927	342528		103456	934485	774723	294730	165753	3.91985e+06	36774.4
LSLEIEQLELQR		2.86874e-18	0.000276662	1	1	38	P04003	P04003 [574-585]		0	1470.82	7.08989e+06	1.40624e+07	8.83944e+07	8.79711e+06	6.04531e+07	1.85712e+07	3.85439e+07	8.47349e+07	3.77919e+07	6.62664e+07		1.38989e+08	1.58247e+06	1.07104e+07	7.99208e+07	5.88912e+07	8.04083e+06	1.83168e+07	3.85838e+07	3.34264e+06	1.55988e+06	3.90691e+06	5.60019e+07	1.02783e+06	1.80435e+07	2.40217e+06	1.51917e+07	2.68739e+07	1.30063e+07	2.43104e+07		3.78511e+07	267151	1.35374e+06	1.3589e+07	5.37838e+07	4.31949e+06	8.3002e+06
LSKELQAAQAR		0.000384629	0.000276662	1	1	6	P02649	P02649 [111-121]		1	1214.69	717500	4.14499e+07	7.63528e+06	955518	937855	1.63915e+06	9.07742e+06	1.17392e+07	8.8054e+06	4.99739e+06			1.07839e+07		537642	5.83466e+06	1.23949e+07		4560569	8.00961e+06	157860	11515867	4837301	111640	279923	212024	3.57777e+06	3.72311e+06	3.03043e+06	1.83334e+06			1.82053e+06		91415.8	5328648	6658448
LSGVQDGHQDISLLYTEPGAGQTHTAASFR		1.24087e-21	0.000276662	1	1	2	P39060	P39060 [540-569]		0	3156.53																409189		322920																		373702		146330
ISISTSGGSFR		4.2997e-10	0.000276662	1	1	43	P13647	P13647 [74-84]		0	1111.57	4.94515e+07	3.28281e+07	1.15951e+07	1.64474e+08	2.09055e+07	1.12824e+08	2.40005e+07	1.86217e+07	2.15319e+07	1.08528e+07		1.03173e+07	3.95928e+07	4.06637e+07	3.85368e+07	4.17051e+06	1.21861e+07	1.56584e+07	5.8698e+06	2.13673e+07	1.088e+07	9.12049e+06	7.34604e+06	1.92166e+07	6.23971e+06	1.45938e+07	9.45953e+06	5.90592e+06	7.41032e+06	3.98146e+06		2.80972e+06	6.68402e+06	5.13968e+06	6.55246e+06	3.80882e+06	6.54629e+06	7.09555e+06
LTIGEGQQHHLGGAK		2.48023e-17	0.000276662	1	1	13	P02679	P02679 [418-432]		0	1545.81	3.76406e+06	2.69904e+06	1.57724e+06	1.16505e+07	9.15501e+06	4.11226e+06	3.12865e+06	5.89311e+06	2.35069e+06	3.72532e+06		1.82515e+06	2.75384e+06	3.19246e+06	5.96123e+06	2.23976e+07	1.98047e+06	1.16768e+08	1.2636e+07	6.65012e+06	828145	749863	999255	1.3612e+06	2.73251e+06	531918	1.23312e+06	1.86901e+06	809003	1366668		497047	464900	403511	1.01359e+06	2.04551e+07	1.0639e+06	5.29129e+07
LSPLGEEMR	1xOxidation [M8]	5.49105e-05	0.000276662	1	1	76	P02647	P02647 [165-173]		0	1047.51	1.16219e+08	2.05722e+08	1.67234e+08	3.08686e+07	5.56895e+07	4.19062e+07	1.7715e+08	1.06279e+08	1.69323e+08	9.6175e+07	2.77476e+07	1.92493e+08	1.42822e+08	9.11551e+07	1.74699e+08	1.54913e+08	3.04978e+08	4.41678e+06	7.44274e+07	1.11086e+08	2.55697e+07	5.7155e+07	1.0595e+08	3.60658e+06	1.66217e+07	5.42054e+06	6.98216e+07	3.37067e+07	5.82736e+07	3.52827e+07	1.05056e+06	5.24221e+07	2.41111e+07	1.15215e+07	2.97043e+07	1.41478e+08	1.63832e+08	2.00145e+06
LSPSCPDALAPK	1xCarbamidomethyl [C5]	6.25561e-08	0.000276662	2	2	11	P98088; Q9HC84	P98088 [1067-1078]; Q9HC84 [1057-1068]		0	1255.64	583748	752131	3.73987e+06	553430	2.33719e+06	1.09276e+06	507538	910722	666568	997622			798287	704610	2.76351e+06	3.58121e+06	870012	293024		838955	128433	208961	2369381	64660.9	697585	141348	200041	288838	229403	365987			134766	89059.1	469881	3.27063e+06	467366	132783
ISVYYNEAYGR		5.68987e-10	0.000276662	1	1	7	Q9H4B7	Q9H4B7 [47-57]		0	1334.64	187794				233953		756212	335707				1.27449e+06	1.61803e+06	2.0063e+06	1.17007e+06		195009	224189	123117	950738	41317.4				69828.3		298053	106470				347084	273155	253586	198947		104758	101591
ISVYYNEATGGK		8.70467e-07	0.000276662	1	1	7	P07437	P07437 [47-58]		0	1301.64	301617	489416	292320	1.24492e+06	538532		1.05467e+06	915520	768264	226796		1.46321e+06	2.45907e+06	2.32159e+06	1.2959e+06	429985	399783		181891	1.38541e+06	66359.9	135972	185198	145452	160736		415688	290359	264402	83202.4		398478	415139	293437	220343	392694	214761
ISVAQGASK		0.000630831	0.000276662	1	1	18	Q9Y6R7	Q9Y6R7 [4174-4182]		0	860.484	2.95536e+07	4.25874e+07	4.05945e+07	1.85085e+07	1.41609e+07	9.38206e+06	1.32752e+07	2.39028e+07	3.36176e+07	1.94797e+07	4.83362e+07	1.65689e+07	3.99633e+07	3.01672e+07	5.43545e+07	1.37776e+07	5.27444e+07	1.01094e+07	14294236	1.24854e+07	6502214	11831872	25718504	2.16247e+06	4.22661e+06	1213564	5.2323e+06	7.58083e+06	1.15697e+07	7.14631e+06	1.83007e+06	4.51224e+06	6.74657e+06	3.81298e+06	9.24195e+06	12582717	2.8334e+07	4.58107e+06
ISTVELEDFKR		3.35966e-11	0.000276662	1	1	1	Q9BXN1	Q9BXN1 [253-263]		1	1336.71													30105.7			440590			96221.9	318897													5082.42			402380
ISTAQVEDTGR		3.14238e-09	0.000276662	1	1	4	Q96RW7	Q96RW7 [3586-3596]		0	1176.59	165350	229900	138526		340672		230048	191412	196303	235815		196284	1.19091e+06	128009		147126		67517.1	185365	423064	36379.3	63872.2	87762.4		101681		90671.2	60706.7	67558.9	86510.9		53454.4	201049	16179.7		134367		30595.2
LSSWVLLMK		0.00157319	0.000276662	1	1	1	P01009	P01009 [259-267]		0	1076.62	129386	130052				238963	244081	217938	68642.6	174929	896375				51668.1	542960	308398		598652	157930	28466.6	36131.8				30909.8	96202	69119.6	23623.7	64174.3	33938				8785.18	495871	165670
LSPLGEEMRDR		3.05877e-05	0.000276662	1	1	9	P02647	P02647 [165-175]		1	1302.65	542660	4.89936e+06	3.22437e+06	1.13021e+06	1.59025e+06	460579	2.20801e+06	3.63617e+06	2.5034e+06	1.91242e+06		3.8309e+06	1.87533e+07	957711	1.60705e+06	3.20798e+06	6.83827e+06	1.0334e+06	1.94426e+06	2.78732e+06	119393	1.36117e+06	2.04279e+06	132051	474645	59575.6	870264	1.15322e+06	861559	701590		1.04328e+06	3.16592e+06	121050	273249	2.92977e+06	3.67348e+06	468284
LSSVTAADTAVYYCAR	1xCarbamidomethyl [C14]	1.13817e-18	0.000276662	2	9	34	P06331; A0A075B6R2	P06331 [108-123]; A0A075B6R2 [102-117]		0	1747.83	1.53994e+07	1.5899e+07	2.30083e+07	1.53457e+07	1.79624e+07	1.12788e+07	1.65911e+07	2.39531e+07	1.54401e+07	3.51109e+07		3.03431e+07	1.08296e+07	8.18195e+06	2.99479e+07	2.47777e+07	2.42161e+07	2.43551e+07	5.31267e+07	2.58665e+07	3.38808e+06	4.41715e+06	1.45768e+07	1.79295e+06	5.36126e+06	1.4589e+06	6.5392e+06	7.5968e+06	5.31379e+06	1.28808e+07		8263404	1.82824e+06	1.03416e+06	5.09206e+06	2.26288e+07	1.30088e+07	1.10364e+07
ISSSKGSLGGGFSSGGFSGGSFSR		1.54655e-10	0.000276662	1	1	3	P13645	P13645 [36-59]		1	2210.05							726248						505386		638913		730362										286243						85318.9		108635		392346
LSSPAVITDK		8.13346e-06	0.000276662	1	1	6	P00747	P00747 [671-680]		0	1030.58	812704	818354	445135	1.05589e+06	778800	1.8668e+06	1.85023e+06	2.43962e+06	825239	1.93944e+06		1.94622e+06		439495	429993	1.32384e+06	2.26592e+06		2.19065e+06	2.88438e+06	178806	227360	282014	123367	232449	241470	729248	773732	284011	711503		530020		55549.9	73112.1	1.20903e+06	1.21724e+06
LSSEVEALR		7.04067e-05	0.000276662	1	1	13	P15924	P15924 [1657-1665]		0	1003.54	2.18422e+06	1.08944e+06	345100	2.96054e+06	629342	3.59069e+06	786726	442776	489059	356411		307934	1.67895e+06	1.26986e+06	868536	154652	472810	2.94405e+06	191417	457691	480559	302674	218636	345900	187841	464454	310080	140427	168312	130753		83860.3	283438	160504	147678	141239	253991	1.33409e+06
LSSAIIAAPR		2.37461e-09	0.000276662	1	1	1	O14594	O14594 [184-193]		0	998.599																		4.77134e+06																				2.16212e+06
LSQETEALGR		2.24003e-07	0.000276662	1	1	5	Q02818	Q02818 [368-377]		0	1103.57	1.09871e+06	1.33984e+06	2.10526e+06	935735	538018	2.60442e+06	842261	1.02727e+06	966948	1.0452e+06		1.96068e+06				172220	557956			1.5282e+07	241732	372242	1.33378e+06	109328	160583	336881	331968	325802	332780	383441		533957				157285	299731
LSQEDPDYGIR		3.12451e-06	0.000276662	1	1	9	P04040	P04040 [253-263]		0	1292.61	1.4065e+06	676872		1.80561e+06	441773	1.33521e+06	2.44208e+06	687930	499091	519562		1.51712e+06	3.79034e+06	1.17224e+06	1.4741e+06	798351	2.1405e+06			770649	309449	188053		210961	131857	172709	962521	218179	171765	190606		413162	639882	148165	250643	729114	1.14986e+06
ISSVLAGGSCR	1xCarbamidomethyl [C10]	2.53882e-11	0.000276662	2	2	24	P02533; P08779	P02533 [31-41]; P08779 [31-41]		0	1106.56	1.98717e+07	7.23453e+06	4.04787e+06	5.90409e+06	8.92355e+06	1.82515e+07	1.12023e+07	2.53892e+06	4.18104e+06	2.19586e+06		1.14393e+06	1.88359e+07	1.28111e+07	2.55304e+06	1.00942e+06	1.9983e+07	1.83771e+06	1.2472e+06	5.10033e+06	4.37205e+06	2.00994e+06	2.56451e+06	689815	2.66342e+06	2.36082e+06	4.41527e+06	805225	1.43893e+06	805574		311530	3.17986e+06	1.61926e+06	434096	921873	1.07347e+07	832752
ITLLLMASQEPQR		1.76388e-11	0.000276662	1	1	5	P04275	P04275 [1380-1392]		0	1499.83	542977		1.58219e+06				2.20633e+06			6.49848e+06			809497				181685		7.42598e+06	95071.4	119462		1.00239e+06				869601			2.38403e+06			136658				97600.4
ITLLLMASQEPQR	1xOxidation [M6]	1.08622e-12	0.000276662	1	1	27	P04275	P04275 [1380-1392]		0	1515.82	8.89404e+06		7.19656e+06				1.05079e+07			3.09561e+07							856490		1.14674e+07	7685.12	1.95681e+06		4.55935e+06				4.14158e+06			1.13566e+07							460102
ITLLSALVETR		1.73934e-11	0.000276662	1	1	9	P01011	P01011 [380-390]		0	1215.73							389252												1.92012e+06	274914							153420
LVSNHSLHETSSVFVDSLTK		2.0965e-17	0.000276662	1	1	5	P21333	P21333 [2521-2540]		0	2200.12	215542		188976						144237			1.22177e+06				752503	1.06071e+06		608863		47422.3		119725						49640			332727				687242	569809
LVRPEVDVMCTAFHDNEETFLKK	1xCarbamidomethyl [C10]; 1xOxidation [M9]	7.32717e-23	0.000276662	1	1	17	P02768	P02768 [139-161]		1	2794.35	563627	218251	1.19925e+06		2.13373e+06		5.23149e+06	6.56266e+06	796595	4.27016e+06		1.21408e+06		341149	301019	903834	861058	6.10881e+06	9101013	1.3934e+06	124006	60635.7	759782		636857		2.06194e+06	2.08136e+06	274153	1.56655e+06		330635		43119.5	51182.6	825449	462556	2.76819e+06
LVRPEVDVMCTAFHDNEETFLKK	1xCarbamidomethyl [C10]	2.39681e-21	0.000276662	1	1	7	P02768	P02768 [139-161]		1	2778.36	65876.6		3.11325e+06	369046	3.03645e+06	148281	6.24065e+06	9.96275e+06	479124	3.10766e+06						1.21847e+07	549259	1.61025e+07	51892117	1.00528e+06	14493.8		1.97239e+06	43118.1	906292	19180.1	2.45969e+06	3.15971e+06	164893	1.14007e+06						1.1128e+07	295059	7296810
LVRPEVDVMCTAFHDNEETFLK	1xCarbamidomethyl [C10]; 1xOxidation [M9]	1.0695e-22	0.000276662	1	1	15	P02768	P02768 [139-160]		0	2666.26	374037	967200	1.37314e+06	237335	2.63557e+06	458216	7.07376e+06	9.81818e+06	1.00513e+06	6.93879e+06		6.31858e+06				1.79185e+06	526832	4.69369e+06	9.93082e+06	1.03689e+06	82293.4	268713	869950	27729.4	786642	59270	2.78805e+06	3.11386e+06	345921	2.54556e+06		1.72075e+06				1636455	283011	2126932
LVRPEVDVMCTAFHDNEETFLK	1xCarbamidomethyl [C10]	2.64203e-44	0.000276662	1	1	7	P02768	P02768 [139-160]		0	2650.26			999826		1.12674e+06		2.82151e+06	3.39049e+06	101546	1.6209e+06	337802					2.57357e+06	82500	1.98517e+06	14365657	131141			633435		336301		1.11207e+06	1.0753e+06	34947.7	594643	12789.6					2.35038e+06	44318.6	899575
IVQILPWEQNEQVK		2.42117e-10	0.000276662	1	1	9	P04114	P04114 [577-590]		0	1723.94	2.35182e+06	4.24316e+06	1.40129e+07	529004	1.82892e+06	423435	6.534e+06	4.14874e+06	7.80965e+06	4.22125e+06		9.47848e+06	71079.3	3.65148e+06	2.68734e+06	2.3977e+07	9.29831e+06		1.03506e+07	1.82596e+06	517433	1.17886e+06	8.87782e+06	61807.1	545880	54771.1	2.57531e+06	1.31578e+06	2.68773e+06	1.5486e+06		2.5813e+06	11999.5	461528	456932	2.18975e+07	4.995e+06
IVSSAMEPDREYHFGQAVR		8.02517e-14	0.000276662	1	1	5	P08603	P08603 [157-175]		1	2192.06	743122			871569	232457		267605	1.21969e+06		340021						306905	556554	524215	957550		163497			101831	69381.6		105474	386826		124740						280288	298978	237547
LVQAFQFTDK		7.52247e-06	0.000276662	1	1	7	Q06830	Q06830 [159-168]		0	1196.63	540032		263996						802282			436401									118815		167254						276110			118846
LVNEVTEFAK		1.93092e-08	0.000276662	1	1	41	P02768	P02768 [66-75]		0	1149.62	2.05731e+07	2.85926e+07	1.73822e+07	1.79589e+07	4.404e+07	9.66296e+07	1.31491e+08	1.43302e+08	6.43722e+07	1.07139e+08		9.52813e+07		1.08494e+07	1.0658e+07	1.25873e+07	1.02559e+08	1.7946e+08	4.25944e+07	2.11636e+08	4.52637e+06	7.94377e+06	11012432	2.09826e+06	1.31447e+07	1.2499e+07	5.18257e+07	4.54485e+07	2.2154e+07	3.93049e+07		2.59482e+07		1.3713e+06	1.81218e+06	11495663	5.50943e+07	8.13217e+07
IVNEGGIDPLLR		2.83986e-11	0.000276662	1	1	4	Q92626	Q92626 [1108-1119]		0	1295.73	924601		632464		214228		301267	234972		452414		219245				1.03718e+06	442366	825734	1.74519e+06	2.10845e+06	203425		400695		63941		118741	74521.8		165972		59707.4				947231	237637	374179
LVNANGEAVYCK	1xCarbamidomethyl [C11]	1.71515e-11	0.000276662	1	1	3	P04040	P04040 [222-233]		0	1337.65	45647.7	181861		315191			743586	128811	127989			597009		465220	262400	272549	1.13909e+06				10043.1	50525.6		36825.9			293077	40852.6	44048.1			162585		58801.4	44616.2	248912	611912
LVIVGDGACGK	1xCarbamidomethyl [C9]	3.2751e-07	0.000276662	1	2	13	P61586	P61586 [8-18]		0	1088.58	511001	747964		105850	184815	237954	478117	988784	781256	384228		728598		452423	361471	502309	562419	171674	271429	721231	112427	207804		12367.1	55161.9	30779.2	188445	313595	268873	140958		198421		57184	61461.2	458746	302129	77793.5
IVLQIDNAR		0.00178509	0.000276662	1	2	18	P05783	P05783 [150-158]		0	1041.61	5.46206e+06	3.89136e+06	519807	1.47918e+07	2.30927e+06	1.17318e+07	1.93101e+06	2.80895e+06	3.14723e+06	2.74715e+06		1.49596e+07	3.48272e+06	3.23369e+06	3.15593e+06		951899		293531	2.59275e+06	1.20173e+06	1.08112e+06	329322	1.72823e+06	689251	1.5175e+06	761088	890865	1.08314e+06	1007818		4.07397e+06	587950	408721	536606		511355
IVLLDVPVR		0.0014995	0.000276662	1	1	12	P08514	P08514 [766-774]		0	1023.66	752002	2.83665e+06	2.07003e+06	287578	1.10304e+06	446855	1.80525e+06	4.35549e+06	1.95952e+06	1.45161e+06		5.66001e+06		9.59718e+06	2.59612e+06	2.92249e+06	2.65751e+06		1.78579e+06	4.10913e+06	165451	788094	1.31146e+06	33599.7	329226	57800.4	711519	1.38135e+06	674380	532538		1.5414e+06		1.21303e+06	441420	2.66904e+06	1.4276e+06
LVPFATELHER		7.33892e-07	0.000276662	1	1	3	P06727	P06727 [80-90]		0	1311.71	207027	357001	279803			69227.1		712054	548333	274646		433247		130150	116641	106502	304894		430457	1.25227e+06	45548.9	99184.1	177268			8954.49		225829	188712	100756		117987		16450.4	19832.6	97265.6	163787
IVLGQEQDSYGGK		1.13284e-12	0.000276662	1	1	10	P02743	P02743 [150-162]		0	1393.7	482053	588120	670160		221710		1.20609e+06	264329		334686		755969			944991	1.00006e+06	1.7695e+06	362588	974608		106058	163395	424577		66174.1		475366	83832.6		122783		205875			160678	913328	950568	164306
IVSSAMEPDREYHFGQAVR	1xOxidation [M6]	2.33417e-11	0.000276662	1	1	4	P08603	P08603 [157-175]		1	2208.05	256982	907297	662998	5.48848e+06	1.70711e+06	2.00987e+06	1.93162e+06	5.98421e+06	1.10088e+06	1.71262e+06		1.93599e+06		1.31031e+06	1.03004e+06	1.06758e+06	2.8834e+06	2.99113e+06	2617969	2.08759e+06	56539.6	252071	420040	641257	509525	259975	761326	1.89791e+06	378874	628292		527232		165616	175139	974995	1.54895e+06	1.35542e+06
LVVLGSGGVGK		6.22236e-11	0.000276662	1	2	15	P61224	P61224 [6-16]		0	985.604	970199	2.88573e+06	1.31779e+06		749580	752838	1.67171e+06	4.10666e+06	2.29274e+06	1.14023e+06		3.10443e+06	6.88041e+06	4.13061e+06	2.01146e+06	1.9255e+06	2.03122e+06		892539	3.01281e+06	213457	801731	834881		223728	97379.1	658886	1.30244e+06	789058	418304		845436	1.16154e+06	522088	342010	1.75851e+06	1091159
LYTISEGYVPNLR		2.26969e-11	0.000276662	1	1	8	Q8WWZ8	Q8WWZ8 [361-373]		0	1524.81	77050.1	371569	449529		255163		150485	271235	215765	245810		218595				438516	128451	686290	319055	115408	16952.1	103231	284798		76158.9		59312.2	86022.8	74256.6	90177.8		59530.5				400486	69003.2	310990
IYSLWEHSTK		1.80511e-06	0.000276662	1	1	14	P04114	P04114 [3559-3568]		0	1263.64	2.70901e+07	2.41896e+07	7.35166e+07	2.75049e+06	1.22021e+07	1.80145e+06	2.94573e+07	2.94065e+07	4.70029e+07	2.59684e+07		193212		6.86768e+07	5.90789e+06	8.10131e+07	4.05565e+07	1.14704e+07	4.39719e+07	1.2603e+07	5.96021e+06	6.72051e+06	4.65761e+07	321358	3641965	233017	1.16103e+07	9.32633e+06	1.61763e+07	9.52677e+06		52618		8.6804e+06	1.00452e+06	7.39872e+07	21786704	5.19778e+06
LYSILGTTLKDEGK		3.82317e-09	0.000276662	1	1	4	O75083	O75083 [471-484]		1	1537.85	74845.1	408309	195564		483552	146366	916874	1.02183e+06	913908	222755				977243	1.08537e+06	550186	542389		426415	1.39932e+06	16467	113439	123899		144327	18932.3	361376	324077	314527	81719.7				123519	184546	502471	291368
IYQFTAASPK		4.87739e-10	0.000276662	1	1	3	O75563	O75563 [196-205]		0	1125.59		281611			261024		308287	211381				654074	2.68423e+07	2.4334e+06	784420	101714	222637	3.00432e+06	116773	605186		78238.9			77908.3		121508	67039.9				178125	4.5315e+06	307569	133376	92892.8	119599	1.3614e+06
LYPTSCHTACTLR	2xCarbamidomethyl [C6; C10]	3.39639e-13	0.000276662	1	1	3	Q08431	Q08431 [207-219]		0	1579.74	754900	1.00662e+06	1.16344e+06		898994	1.13822e+06	1.10919e+06	713446	1.23487e+06	489458		796001	732831	161153	373458	316923	1.00527e+06	632555	642535	1.40021e+06	166089	279666	737096		268324	147228	437177	226271	424989	179562		216777	123716	20368.9	63499.5	289437	540027	286641
LYPPSAEYPDLR		9.50322e-08	0.000276662	1	1	5	P12532	P12532 [46-57]		0	1420.71			784338										105747			930501			1.01824e+06				496914										17852.1			849803
IVTENIPCGTTGTTCSK	2xCarbamidomethyl [C8; C15]	4.25231e-07	0.000276662	1	1	2	Q9HC84	Q9HC84 [937-953]		0	1838.86		119562	1.22623e+06	161050	575028	140566		155645		176765		122144		138189	600349	940451						33217.3	776870	18816.6	171629	18182.1		49363.1		64847.8		33263.7		17466.4	102078	858890
IYLYTLNDNAR		1.47024e-11	0.000276662	1	1	27	P02751	P02751 [1881-1891]		0	1355.7	4.18998e+06	6.44983e+06	2.91775e+06	5.33214e+06	6.57392e+06	5.8781e+06	4.24886e+06	5.47252e+06	6.30092e+06	8.42958e+06		2.49397e+06	1.81285e+06	3.6247e+06	7.89461e+06	6.25653e+06	2.02259e+06	1.48869e+07	3.1046e+06	1.02528e+07	921854	1.79193e+06	1.84853e+06	622990	1.96213e+06	760330	1.67464e+06	1.73562e+06	2.1685e+06	3.09247e+06		679189	306044	458144	1.34233e+06	5.71393e+06	1.08652e+06	6.74598e+06
LYHSEAFTVNFGDTEEAKK		2.53882e-11	0.000276662	1	1	3	P01009	P01009 [161-179]		1	2186.04																452019			477834																	412818
IYGNQDTSSQLK		2.53682e-16	0.000276662	1	1	10	P19823	P19823 [476-487]		0	1353.66	1.6396e+06	564958	1.18657e+06	740881	1.8994e+06	1.71248e+06	3.18511e+06	1.31898e+06	1.26116e+06	1.7156e+06		1.38731e+06	1.06434e+06	843285	943122	2.15045e+06	2.16008e+06	3.14062e+06	1.17656e+06	3.60843e+06	360735	156960	751749	86562.1	566917	221508	1.25538e+06	418317	434035	629382		377809	179680	106587	160360	1.96395e+06	1.16038e+06	1.42316e+06
IYFTDSSSK		4.9346e-06	0.000276662	1	1	1	Q9HDC9	Q9HDC9 [212-220]		0	1047.5		198256			152014			74946.1				63936.1			84372.1	446465	193051		126548	75597.7		55080.7			45371.8			23769.3				17411.9			14345.9	407745	103706
LYDYCDVPQCAAPSFDCGKPQVEPK	3xCarbamidomethyl [C5; C10; C17]	5.71772e-08	0.000276662	1	1	5	P00747	P00747 [551-575]		0	2944.3								365474		465982							316748											115911		170950							170155
LVYLVENPGGYVAYSK		4.07472e-13	0.000276662	1	1	4	P02786	P02786 [209-224]		0	1771.93								1.19162e+06							82562.4	174020			763191	72182.6								377926							14038.2	158928
LVVVGAGGVGK		0.000241359	0.000276662	1	3	15	P01116	P01116 [6-16]		0	955.593	521471	574187	223923			375017	354639	1.47553e+06	1.07175e+06	564750		812995	527294	636038	393727	442884	503108	55629.6		1.18365e+06	114731	159524	141865			48508.3	139777	467968	368850	207184		221405	89017.2	80391.9	66945.7	404475	270267	25208.4
IYLSDSLTGK		0.000364397	0.000276662	1	1	3	Q7Z7G0	Q7Z7G0 [989-998]		0	1096.59	335391							804086				240431			427312	131482			265161	397597	73790.6							255018				65477.2			72656.2	120079
ISGVGIDQPPYGIFVINQK		1.22504e-08	0.000276662	1	1	4	Q02413	Q02413 [87-105]		0	2045.11	113869			582268		806765	265063							163945	444460						25052.8			68030.3		104355	104472							20721.9	75572
LVHVEEPHTETVR		2.53088e-13	0.000276662	1	1	22	P01023	P01023 [720-732]		0	1545.8	1.0226e+08	1.2721e+08	8.71208e+07	5.683e+07	1.34915e+08	6.7098e+07	9.98473e+07	6.92976e+07	1.31977e+08	1.36869e+08		1.51845e+08	1.21475e+08	1.06779e+08	1.56156e+08	1.12174e+08	5.86691e+07	1.18168e+08	1.16556e+08	1.21899e+08	2.24985e+07	3.53424e+07	5.51951e+07	6.63983e+06	4.02682e+07	8.6791e+06	3.93537e+07	2.19779e+07	4.54207e+07	5.02117e+07		4.13522e+07	20507270	1.34963e+07	2.65513e+07	1.02446e+08	3.15167e+07	5.35473e+07
IVGPSGAAVPCK	1xCarbamidomethyl [C11]	3.72595e-12	0.000276662	1	1	9	P21333	P21333 [1008-1019]		0	1155.62	507926	758611	320522		566011	460535	1.75037e+06	1.06383e+06	455825	286482		3.00386e+06	1.32381e+07	1.03951e+07	3.93209e+06	1.7824e+06	531889		1.54506e+06	2.09079e+06	111751	210762	203066		168938	59569.9	689889	337397	156875	105099		818049	2234841	1.31388e+06	668577	1.62782e+06	285728
ITVVAGEHNIEETEHTEQK		5.19459e-19	0.000276662	1	1	1	P00740	P00740 [275-293]		0	2164.05			115940				199713	124169	52215.7			219331		49405.4	204253	654128	335604		154147	324690			73453.2				78714.6	39380.6	17970.3			59730.8		6244.59	34729.3	597398	180285
LTVSSLQESGLK		1.23216e-12	0.000276662	1	1	13	P21333	P21333 [2335-2346]		0	1261.7	779604	1.0941e+06			569338	525397	2.22739e+06	1.41864e+06		532482		4.0682e+06	1.29439e+07	1.06411e+07	3.6547e+06	1.33007e+06	697088	305945	1.48448e+06	2.72984e+06	171524	303971			169931	67959.8	877903	449925		195346		1.1079e+06	2.18518e+06	1344981	621412	1.21472e+06	374472	138638
LTVAAPPSGGPGFLSIERPDSRPPR		3.97021e-05	0.000276662	2	2	2	P0C0L4; P0C0L5	P0C0L4 [460-484]; P0C0L5 [460-484]		0	2574.38		204326	1.19752e+06		745180		756865	987083	677313	667453		511109			206969	1.79896e+06	1.03473e+06		1.77682e+06			56766.9	758685		222415		298310	313056	233101	244862		139192			35191.1	1.64294e+06	555852
LTSALDELLQATR		2.58866e-12	0.000276662	1	1	4	P26022	P26022 [113-125]		0	1430.78
LTQVVEQER		3.7878e-05	0.000276662	1	1	22	A1L4H1	A1L4H1 [1507-1515]		0	1101.59	2.40325e+07	3.63694e+07	2.66012e+07	4.24719e+07	1.92313e+07	4.29608e+07	2.96878e+07	5.08863e+07	2.24595e+07	2.65174e+07	2.90988e+07	4.24814e+07	2.26867e+07	1.5773e+07	4.01742e+07	1.81227e+07	2.61368e+07	4.72606e+07	2.40666e+07	2.95982e+07	5.28749e+06	1.01043e+07	1.68531e+07	4.96228e+06	5.73998e+06	5.55696e+06	1.17011e+07	1.61387e+07	7.72957e+06	9.72818e+06	1.10172e+06	1.15691e+07	3.82995e+06	1.99362e+06	6.83086e+06	1.6551e+07	1.40405e+07	21416010
ITQSNAILR		0.00144546	0.000276662	1	3	1	P46439	P46439 [70-78]		0	1015.59	334635	200132		237459		215186		110572	166275			1.81879e+06		318755	166276					146749	73624.4	55601.8		27743.9		27834.1		35068.1	57224.4			495316		40289	28272.1
ITYGETGGNSPVQEFTVPGSK		1.54169e-12	0.000276662	1	1	9	P02751	P02751 [1480-1500]		0	2168.05	6.39305e+06	9.68763e+06	4.63009e+06	6.76662e+06	1.04798e+07	1.02633e+07	5.41452e+06	8.23e+06	8.51202e+06	1.06479e+07	4.8381e+07	6.46986e+06	6.71889e+06	4.26688e+06	8.09592e+06	8.09682e+06	3.18313e+06		4446008	1.21841e+07	1406561	2.69147e+06	2.93337e+06	790590	3.12793e+06	1.32755e+06	2.13408e+06	2.61016e+06	2.92946e+06	3.90627e+06	1.83177e+06	1761951	1.13428e+06	539312	1.37656e+06	7394616	1.70996e+06
LTQLYEQAR		4.13104e-07	0.000276662	1	1	13	Q86UX7	Q86UX7 [268-276]		0	1121.59	339804	1.02899e+06	698175	130722	857652	622186	1.2802e+06	1.63095e+06	737608	426714		1.60759e+06	4.60903e+06	4.25438e+06	2.10684e+06	1.41809e+06	1.0133e+06	737030	723557	2.20722e+06	74761.7	285880	442326	15273.2	255985	80479.4	504577	517260	253852	156544		437799	778092	537732	358228	1.2951e+06	544340	333983
LTPLQFGNLQK		0.000109027	0.000276662	1	1	7	Q9HC84	Q9HC84 [226-236]		0	1258.72	426260	536119	6.52321e+06		2.4051e+06			681134	510152	759987		397910		449904	2.77959e+06	4.15342e+06	573562		736342	369441	93783.2	148948	4132753		717852			216023	175572	278808		108364		56865.6	472617	3.79321e+06	308114
LTPEEEEILNK		7.26519e-08	0.000276662	1	1	9	P62241	P62241 [129-139]		0	1314.68	523030	888702		3.7924e+06	1.34914e+06	1.80386e+06	1.1925e+06	1.10184e+06	1.14107e+06	1.17055e+06		952340	289528	1.40837e+06	1.83091e+06	573701	518205	1.1957e+06	401851	1.77274e+06	115074	246905		443092	402681	233328	470012	349452	392707	429428		259353	48877.8	178010	311312	523947	278377	541827
ITNCPSVNDGR	1xCarbamidomethyl [C4]	4.20364e-11	0.000276662	1	1	10	Q4LDE5	Q4LDE5 [1499-1509]		0	1232.57	627103	799945	425880	201919	700503	572939	1.19446e+06	995688	549993	1.10242e+06		1.14025e+06	113764	1.15499e+06	1.68413e+06	3.92598e+06	810077	5.31673e+06	3.10658e+06	1.99658e+06	137972	222245	269814	23591.6	209080	74109.4	470783	315785	189283	404434		310526	19205.5	145985	286354	3.5855e+06	435169	2409263
ITMQNLNDR		0.00146336	0.000276662	2	2	4	P19012; P13646	P19012 [107-115]; P13646 [106-114]		0	1104.55	257229			210938				333899	83046.2	1.00024e+06			4.76944e+07	1.84239e+07			94416.8		55721.9		56593.9			24645.3				105897	28580.8	366949			8.05172e+06	2.32869e+06			50720.2
LTISEQNIQR		1.69666e-09	0.000276662	1	1	28	P04114	P04114 [335-344]		0	1201.65	1.22746e+08	1.55196e+08	3.14043e+08	2.07075e+07	3.88477e+07	1.83065e+07	1.46376e+08	6.29662e+07	1.58249e+08	7.24545e+07	9.68469e+06	1.40406e+08	1.69347e+08	1.12439e+08	6.65673e+07	2.06439e+08	1.6258e+08	2.46987e+07	1.27853e+08	5.95024e+07	2.70059e+07	43117583	1.98961e+08	2.41939e+06	1.15949e+07	2.36794e+06	5.76925e+07	1.99699e+07	5.44621e+07	2.65806e+07	366676	3.82371e+07	2.8589e+07	1.42117e+07	1.13185e+07	1.88536e+08	8.7337e+07	11192150
ITLPVDFVTADKFDENAK		7.89532e-11	0.000276662	1	1	1	P00558	P00558 [280-297]		1	2023.04
ITQCSVEIQR	1xCarbamidomethyl [C4]	2.24523e-09	0.000276662	1	1	4	O15400	O15400 [25-34]		0	1233.63	134776	84647.8		43779.2			180816	555847	162492			393689	980636	738535	242060				210387	573271	29652.6	23517.3		5115.02			71266.5	176288	55922.5			107214	165550	93347.1	41157.8
LVGSTSDTSR		0.000218962	0.000276662	1	1	8	Q8NI99	Q8NI99 [209-218]		0	1022.51	823479	758601	574079	424876	616180	353759	316294	575916	268248	291125				175846	132930			537610	221453	213340	181177	210759	363705	49641.1	183912	45758.6	124664	182653	92319.2	106802				22226.1	22602.3			243617
ITYGQCGDVLR	1xCarbamidomethyl [C6]	4.46218e-05	0.000276662	2	2	1	P08590; P12829	P08590 [71-81]; P12829 [73-83]		0	1281.63	1.92211e+06	1.08788e+06	954918	984774	884780	992451	468478		862009	826968		536895		838756	1.07397e+06		420319		525754	440936	422892	302242	604984	115058	264081	128373	184646		296665	303381		146214		106014	182607		225793
IVATKPLYVALAQR		0.000179483	0.000276662	1	2	2	P11940	P11940 [357-370]		0	1542.94																973690	96977.6	568512																		889247	52095.8	257620
LVGITSWGEGCAR	1xCarbamidomethyl [C11]	2.86124e-08	0.000276662	1	1	3	P03952	P03952 [592-604]		0	1405.69			177168									219667			792272	380400							112244									59822.4			134711	347409
LVGGSSICEGTVEVR	1xCarbamidomethyl [C8]	5.00959e-05	0.000276662	1	1	2	P06127	P06127 [278-292]		0	1562.78							152631	314499	502709	203509							103408										60158	99744	173010	74659.3							55550.3
LVGGDNLCSGR	1xCarbamidomethyl [C8]	2.37999e-12	0.000276662	1	1	31	O43866	O43866 [246-256]		0	1147.55	3.83974e+08	1.91026e+08	1.52745e+08	4.81859e+08	5.05867e+08	2.9251e+08	1.7397e+08	1.46878e+08	1.59176e+08	2.61492e+08	9.76035e+08	1.63923e+08	3.56951e+08	2.93659e+08	2.71991e+08	9.74754e+07	1.85095e+08	9.30604e+07	1.56832e+08	1.60366e+08	8.44796e+07	5.30719e+07	9.6771e+07	5.62988e+07	1.50987e+08	3.78361e+07	6.85686e+07	4.65828e+07	5.47814e+07	9.59307e+07	3.69541e+07	4.46414e+07	6.02602e+07	3.7117e+07	4.6247e+07	8.90218e+07	9.94318e+07	4.21701e+07
LVGFIDDAVKK		9.71076e-13	0.000276662	1	1	12	P04114	P04114 [2393-2403]		1	1204.69	4.55466e+06	3.73823e+06	2.65432e+07	295605	1.25146e+06		2.77721e+06	2.91107e+06	7.85948e+06	4.39031e+06			4.39762e+06		988450	4.5731e+07	1.40692e+07	212690	1.18867e+07	1.7815e+06	1.00209e+06	1.03858e+06	1.68163e+07	34537.5	373525		1.09461e+06	923253	2.70488e+06	1610626			742402		168067	4.1765e+07	7.55792e+06	96379.8
LVGFIDDAVK		1.35717e-07	0.000276662	1	1	18	P04114	P04114 [2393-2402]		0	1076.6	2.94838e+07	2.04905e+07	1.14366e+08	2.24892e+06	7.62127e+06	1.20075e+06	1.25842e+07	1.21758e+07	3.57312e+07	1.95607e+07		1.64357e+07	63060	2.87942e+07	6.86414e+06	1.47942e+08	7.32866e+07	5.46459e+06	4.78612e+07	8.86818e+06	6.48685e+06	5.69278e+06	7.24562e+07	262756	2.27473e+06	155316	4.95992e+06	3.86158e+06	12297081	7176025		4.47599e+06	10645.7	3.63943e+06	1.16712e+06	1.35112e+08	3.93692e+07	2476265
LVEVNGVNVEGETHHQVVQR		2.72697e-06	0.000276662	1	1	1	Q15599	Q15599 [56-75]		0	2243.15	196320	147041		319521	423497	840765		457364	299533	233137				251062	172408	158107				504470	43193.2	40851.8		37331.8	126402	108753		145054	103086	85528.6				31733	29314.7	144395
LTYNHGGITGSR		4.82054e-13	0.000276662	1	1	7	Q9Y6R7	Q9Y6R7 [276-287]		0	1275.64	5.58655e+06	4.34184e+06	5.51481e+06	2.16165e+06	2.77078e+06	1.06885e+06	3.04388e+06	3.16302e+06	6.73555e+06	3.1321e+06		2.38908e+06		3.94705e+06	3.22339e+06	2.17186e+06	6.46328e+06		3.66784e+06	2.3506e+06	1229118	1.20628e+06	3.49388e+06	252560	826999	138255	1199714	1.00316e+06	2.31808e+06	1.14904e+06		650624		498886	548076	1.98351e+06	3.47204e+06
IVEVFDIGPK		0.000364397	0.000276662	1	1	3	Q99715	Q99715 [1225-1234]		0	1116.63		98197.2	45497.4				51446.8	447387	54677.6	166007		135605			77033.7	90643.5	430539		631603	91065.7		27281.7	28824.7				20277.2	141890	18817.6	60901.1		36929.7			13098.1	82782.4	231283
LVEENALAPDFSK		4.88854e-13	0.000276662	1	1	5	Q13201	Q13201 [1080-1092]		0	1432.73		2.01098e+06	1.6189e+06											4.77995e+06	1.44286e+06	1.18578e+06			1.16951e+06	1.09229e+06		558703	1.02565e+06											604161	245330	1082947
LVDEDMNSFK		2.86124e-08	0.000276662	1	1	2	Q06033	Q06033 [507-516]		0	1197.55				298644		170647	270997	146618			362686				355923	608631	334201		266723	398044				34892.6		22073.1	106811	46500.4			13731.8				60517.9	555847	179531
LVCSGLLQASK	1xCarbamidomethyl [C3]	0.00194721	0.000276662	1	1	1	Q9UHG3	Q9UHG3 [256-266]		0	1175.65		9.43274e+06	9.02944e+06													8.91584e+06	1.39172e+07					2620660	5720565													8142607	7476232
LVCPADNLRAEGLECTK	2xCarbamidomethyl [C3; C15]	2.81561e-12	0.000276662	1	1	6	P04275	P04275 [774-790]		1	1945.95		785590			496670	384622	359192	855586	417678	747459						982480			343314			218257			148242	49750.7	141572	271351	143746	274212						897274
LVCPADNLR	1xCarbamidomethyl [C3]	0.00182501	0.000276662	1	1	70	P04275	P04275 [774-782]		0	1057.55	4.57071e+08	4.98729e+08	2.09729e+08	9.95521e+07	6.72103e+08	5.45993e+08	5.11747e+08	4.84745e+08	7.76622e+08	9.43317e+08	2.94969e+08	3.54e+08	7.399e+08	4.67672e+08	3.82563e+08	8.52512e+08	3.33019e+08	1.40244e+09	4.93462e+08	5.25597e+08	1.00562e+08	1.3856e+08	1.32873e+08	1.16313e+07	2.00603e+08	7.06239e+07	2.017e+08	1.53738e+08	2.67279e+08	3.46065e+08	1.11679e+07	9.64055e+07	1.24909e+08	5.91114e+07	6.50475e+07	7.78578e+08	1.78896e+08	6.3551e+08
LVAYYTLIGASGQR		0.000227697	0.000276662	1	1	5	P01024	P01024 [531-544]		0	1511.82	178708	378769	979392	831317	512433	464079	870405	732226	744769	991277		1.5048e+06		134212	538252	1.45615e+06	412512		1.76142e+06	427428	39318.4	105232	620489	97128.4	152946	60028.3	343061	232227	256316	363659		409806		16963.8	91519.5	1.32987e+06	221599
LVELAHQYK		1.43992e-07	0.000276662	1	1	9	P04114	P04114 [2361-2369]		0	1100.61	1.06383e+08	5.671e+07	1.84512e+08	5.0352e+06	2.34721e+07	3.15786e+06	5.32526e+07	4.41732e+07	8.43186e+07	4.02642e+07		9.38304e+07	1.10153e+08	1.07525e+08	1.94046e+07	1.74372e+08	1.03425e+08		7.85454e+07	3.10582e+07	2.34058e+07	1.57555e+07	1.16897e+08	588297	7.00576e+06	408467	2.09889e+07	1.40096e+07	2.90187e+07	1.47713e+07		2.55531e+07	18595966	13590602	3.29939e+06	1.59249e+08	5.55595e+07
ISGVALHDQGQYECQAVNIIGSQK	1xCarbamidomethyl [C14]	3.32346e-09	0.000276662	1	1	2	Q92626	Q92626 [489-512]		0	2615.29																169197			207662																	154523
ISGQEVNEAACDIAR	1xCarbamidomethyl [C11]	2.60278e-13	0.000276662	1	1	1	Q93088	Q93088 [94-108]		0	1632.76			635211																				402436
ISGLIYEETR		2.42673e-13	0.000276662	1	1	25	P62805	P62805 [47-56]		0	1180.62	1.05793e+07	2.16533e+07	2.23331e+06	3.44537e+07	5.16318e+06	6.77235e+06	3.79942e+07	3.27582e+08	1.70022e+07	4.00556e+06		5.31067e+07		5.7912e+06	1.98848e+07	4.39032e+07	3.88272e+07	1.68977e+07	3.55273e+07	1.18584e+07	2.32759e+06	6.01585e+06	1.4149e+06	4.02546e+06	1541060	876000	14975001	1.03893e+08	5851396	1.46948e+06		1.44627e+07		731978	3381033	40095652	20857764	7657163
LNIPVSQVNPR		0.000223293	0.000276662	1	2	8	P05023	P05023 [648-658]		0	1236.71	918212	393620	414561	1.44419e+06		330183	331530	1.51486e+06	1.12454e+06	609221		1.46144e+06	1.153e+06	632941		407100		546974	600966	1.07417e+06	202019	109358	262643	168734		42709	130669	480442	387017	223498		397997	194649	80000.6		371794		247860
LNILNNNYK		4.89542e-05	0.000276662	1	1	6	O14791	O14791 [382-390]		0	1105.6	1.02465e+06	1.28421e+06	1.85767e+06	758977	1.01101e+06	1.10185e+06	1.87282e+06		3.13299e+06	2.81511e+06				1.25049e+06		7.29046e+06	5.05905e+06		4663232		225437	356787	1.17692e+06	88676.4	301759	142524	738153		1.07824e+06	1.03275e+06				158055		6.65819e+06	2.71769e+06
LNGTDPEDVIR		3.57732e-06	0.000276662	1	3	2	O14950	O14950 [94-104]		0	1228.62	239389	690786		419664		300838	233307	626142	285594	168119				573160	274510	99482.6	252499		638577	417783	52669	191918		49032.2		38913.3	91955.4	198582	98288.7	61676.1				72444.6	46675.2	90854.9	135641
LNGEIQALELPQKAEALK		2.23279e-05	0.000276662	1	1	1	P04114	P04114 [2450-2467]		1	1965.1		217869	802299		157245		134225	235993	372299	176154		483711				674169	308092		587149			60529.8	508293		46933.2		52903.4	74845.8	128129	64623.8		131730				615702	165505
LNGEIQALELPQK		8.29827e-15	0.000276662	1	1	19	P04114	P04114 [2450-2462]		0	1452.81	4.77313e+07	2.76651e+07	1.00794e+08	2.61581e+06	1.16782e+07	1.42223e+06	1.46725e+07	3.06804e+07	4.44085e+07	2.42158e+07		2.28062e+07		3.73624e+07	7.65226e+06	5.87292e+07	3.44721e+07	6.61829e+06	51326838	1.43565e+07	1.05016e+07	7.68607e+06	6.38573e+07	305623	3.48559e+06	183964	5.78303e+06	9.73036e+06	1.52834e+07	8.8838e+06		6.21088e+06		4.72242e+06	1.30112e+06	53635841	1.85182e+07	2.99906e+06
LNEAAAGLNQAATELVQASR		5.65002e-19	0.000276662	1	1	6	Q9Y490	Q9Y490 [1242-1261]		0	2027.05	85870.8	216779	268941		514757		729724	937356	253467			3.58466e+06		1.77544e+06	2.06408e+06	468553	407148	30410.2	428368	283372	18892.8	60226.8	170386		153640		287613	297285	87232.1			976218		224407	350957	427917	218718	13780.3
LNMGITDLQGLR		3.67412e-12	0.000276662	2	2	10	P0C0L4; P0C0L5	P0C0L4 [326-337]; P0C0L5 [326-337]		0	1330.71	157541	449030	444153	240152	462858	210536	383784	1.20014e+06	504484	699762		1.18236e+06		222246	588531	1.89361e+06	533046	759994	2.12243e+06	423129	34661.2	124752	281391	28058.6	138150	27232.8	151264	380627	173621	256714		321994		28090.8	100069	1.72939e+06	286349	344389
LNDSILQATEQR		1.22165e-13	0.000276662	1	1	10	P15924	P15924 [1256-1267]		0	1387.72	1.30012e+06	611882		1.75871e+06		2.45992e+06	385235	548683					652293	916651	644759		253214			564599	286044	169997		205482		318190	151836	174016					110120	115860	109629		136025
LNDLNSVLVMPTFHVPFTDLQVPSCK	1xCarbamidomethyl [C25]	8.37047e-32	0.000276662	1	1	1	P04114	P04114 [3737-3762]		0	2971.51																5.30026e+06			874514																	4.84059e+06
LNDLEDALQQAKEDLAR		1.69522e-14	0.000276662	1	1	1	P04264	P04264 [444-460]		1	1941.99			162901		98031.5											210719			313609				103205		29259.6											192444
LNDLEDALQQAK		9.68059e-15	0.000276662	1	1	33	P04264	P04264 [444-455]		0	1357.7	6.83423e+07	3.8729e+07	2.12373e+07	1.09226e+08	2.24853e+07	9.40264e+07	2.78233e+07	1.47601e+07	2.87457e+07	1.11744e+07		1.22953e+07	901403	6.6502e+07	2.7219e+07	7.30289e+06	2.66107e+07	1.45046e+07	1.27334e+07	2.09766e+07	1.50363e+07	1.07599e+07	1.34548e+07	1.27616e+07	6.71121e+06	1.21623e+07	1.09663e+07	4.68121e+06	9.89298e+06	4.09942e+06		3.3484e+06	152174	8.40551e+06	4.62807e+06	6669544	1.42951e+07	6.57274e+06
IMQNTDPHSQEYVEHLKDEAQVCAIIER	1xCarbamidomethyl [C23]; 1xOxidation [M2]	6.05047e-11	0.000276662	1	2	16	B5ME19	B5ME19 [459-486]		1	3369.58	1.14882e+08	4.30016e+07	8.68852e+06	1.21319e+07	4.05662e+06	1.46659e+06	667685	710137	518439	287393											2.52756e+07	1.1947e+07	5.50458e+06	1.41745e+06	1.21078e+06	189703	263161	225222	178424	105433
IMQNTDPHSQEYVEHLKDEAQVCAIIER	1xCarbamidomethyl [C23]	3.51499e-09	0.000276662	1	2	2	B5ME19	B5ME19 [459-486]		1	3353.59	2.13068e+07	2.89569e+06																			4.68779e+06	804498
LMQCLPNPEDVK	1xCarbamidomethyl [C4]; 1xOxidation [M2]	2.46096e-13	0.000276662	1	1	85	P04003	P04003 [555-566]		0	1459.69	6.05158e+07	5.21183e+07	2.69061e+07	7.1945e+07	5.9249e+07	6.45333e+07	4.34888e+07	1.16094e+08	6.3241e+07	6.51299e+07	6.274e+08	9.37662e+07	6.22643e+07	8.65862e+07	1.54346e+08	3.9614e+07	3.20456e+07	4.32502e+07	3.87235e+07	4.48702e+07	1.33143e+07	1.44798e+07	1.70462e+07	8.40583e+06	1.76841e+07	8.34735e+06	1.71406e+07	3.68196e+07	2.17647e+07	2.38935e+07	23754238	2.55356e+07	10511398	1.0944e+07	2.62437e+07	3.61785e+07	1.72147e+07	1.95987e+07
LNDLNSVLVMPTFHVPFTDLQVPSCK	1xCarbamidomethyl [C25]; 1xOxidation [M10]	1.95324e-22	0.000276662	1	1	6	P04114	P04114 [3737-3762]		0	2987.5																6.37256e+06			3.22251e+06																	5.8199e+06
LMQCLPNPEDVK	1xCarbamidomethyl [C4]	5.17025e-13	0.000276662	1	1	33	P04003	P04003 [555-566]		0	1443.7	3.295e+07	2.94512e+07	2.0691e+07	3.73652e+07	5.93649e+07	2.81372e+07	2.80387e+07	9.97085e+07	2.50227e+07	3.37023e+07	1.22359e+08	4.50678e+07	2.2037e+07	2.67755e+07	5.87566e+07	4.28455e+07	2.21312e+07	2.6015e+07	4.18511e+07	2.17031e+07	7.24947e+06	8.18229e+06	1.31087e+07	4.36563e+06	1.77187e+07	3.63953e+06	1.10512e+07	3.16228e+07	8.61169e+06	1.2364e+07	4.63268e+06	1.22734e+07	3.72026e+06	3.38429e+06	9.99044e+06	3.91297e+07	1.18888e+07	1.17886e+07
LNMGITDLQGLR	1xOxidation [M3]	2.17526e-07	0.000276662	2	2	7	P0C0L4; P0C0L5	P0C0L4 [326-337]; P0C0L5 [326-337]		0	1346.71	198271												229538			546669		682968	766750		43622.5												38750.4			499259		309485
LNNGEITQHRK		4.76842e-11	0.000276662	1	1	3	P04003	P04003 [370-380]		1	1309.7	460371	1.31718e+06	162806	2.01064e+06	1.08918e+06	2.09694e+06	462273	1.65587e+06	719779	696164			191124	712091	1.25778e+06		305774	92095		868979	101288	365946	103145	234916	325090	271238	182200	525164	247716	255394			32265.4	90004.6	213862		164260	41732.6
IPEISIQDMTAQVTSPSGK	1xOxidation [M9]	4.90389e-11	0.000276662	1	1	3	P21333	P21333 [2166-2184]		0	2018.01												645400	1.55686e+06	674014																		175763	262828	85192
LPELAPTAPLPYPAPEASGPPAVAPR		0.00146336	0.000276662	1	1	1	Q9H9H4	Q9H9H4 [180-205]		0	2579.39
LPECEAVCGKPK	2xCarbamidomethyl [C4; C8]	2.20526e-16	0.000276662	2	2	17	P00739; P00738	P00739 [84-95]; P00738 [142-153]		0	1387.67	4.99165e+07	9.61275e+07	1.20289e+08	5.58547e+08	2.08453e+08	2.16039e+08	7.30367e+07	1.04e+08	7.4175e+07	1.04564e+08	57214.3	1.91373e+08	2.30323e+08	1.82445e+08	1.12509e+09	1.25967e+08	9.52791e+07	1.77094e+08	2.8955e+08	1.66581e+08	1.09823e+07	2.67067e+07	7.62084e+07	6.52588e+07	6.22173e+07	2.79445e+07	2.87866e+07	3.29839e+07	2.55277e+07	3.83603e+07	2166.21	5.21172e+07	3.88828e+07	2.30601e+07	1.913e+08	1.15042e+08	5.11834e+07	80249648
LPECEADDGCPKPPEIAHGYVEHSVR	2xCarbamidomethyl [C4; C10]	3.73225e-65	0.000276662	1	1	56	P00738	P00738 [83-108]		0	2962.35	223573	9.27808e+06	6.10006e+07	6.86536e+07	8.88181e+07	3.85168e+07	2.04189e+07	3.39731e+07	1.57926e+07	2.79989e+07		8.46511e+07	1.38185e+07	3.45708e+07	2.70111e+08	4.38142e+07	1.71352e+07	7.22341e+07	1.61899e+08	2.62842e+07	49189.2	2.57769e+06	3.86467e+07	8.02126e+06	2.65097e+07	4.98213e+06	8.0479e+06	1.07746e+07	5.43511e+06	1.02717e+07		2.30532e+07	2.33282e+06	4.36958e+06	4.59271e+07	4.00144e+07	9.20495e+06	3.27327e+07
IPCFLAGDTR	1xCarbamidomethyl [C3]	0.000113779	0.000276662	2	2	5	P05164; P11678	P05164 [396-405]; P11678 [368-377]		0	1149.57								7.96516e+06				4.48672e+06				1.10024e+06	1.84297e+06		2.56292e+06									2526168				1.22188e+06				1.00482e+06	990035
IPACIAGER	1xCarbamidomethyl [C4]	0.000716552	0.000276662	1	2	13	P59665	P59665 [70-78]		0	986.509	3.81109e+06	4.47236e+06	1.00145e+06	6.44245e+06	2.15282e+06	3.60954e+06	2.81486e+06	2.05863e+06	1.56417e+06	1.69289e+06		5.55056e+06	4.81778e+06	3.38696e+06	3.99213e+06	4.53813e+06	1.31182e+07	2.56685e+06	2701295	2.26538e+06	838492	1.24254e+06	634467	752715	642554	466892	1.10945e+06	652898	538319	621051		1.5116e+06	813332	428094	678786	4.14456e+06	7047026	1.16316e+06
LNNGEITQHR		1.36337e-10	0.000276662	1	1	33	P04003	P04003 [370-379]		0	1181.6	7.29319e+07	6.39585e+07	4.90945e+07	9.08859e+07	6.40763e+07	8.05863e+07	4.978e+07	1.15154e+08	5.25042e+07	4.81344e+07		8.72019e+07	4.67198e+07	8.44419e+07	1.63242e+08	5.27421e+07	3.69345e+07	3.46509e+07	56463502	4.64607e+07	1.6046e+07	17769324	31103586	10618815	19124945	1.04238e+07	19620258	36521270	1.80696e+07	17658560		2.37479e+07	7.8872e+06	1.0673e+07	2.77561e+07	48168020	19840986	1.5702e+07
LNVITVGPR		1.00285e-06	0.000276662	1	1	15	P04040	P04040 [39-47]		0	968.589	4.62279e+06	2.13299e+06	516878	2.82179e+06	1.15467e+06	2.13844e+06	5.08829e+06	1.66313e+06	1.64242e+06	1.23035e+06		5.24378e+06	6.74683e+06	4.8051e+06	3.34604e+06	1.99059e+06	6.44743e+06	697316	846620	2.70652e+06	1.01708e+06	592600	327466	329689	344637	276606	2.0055e+06	527465	565248	451366		1.42805e+06	1.13899e+06	607341	568930	1.81795e+06	3463524	315987
LNVEGEHCDVCK	2xCarbamidomethyl [C8; C11]	1.65974e-05	0.000276662	1	1	2	P07942	P07942 [430-441]		0	1459.63	370897	564876	325674	247383	434298	326912	472718	366908	409627	380306		427953	249687	450381	260555	552894	162358		786544	776843	81602.5	156937	206329	28903.5	129626	42285.9	186317	116366	140975	139519		116545	42152	56925.8	44302.4	504944	87217.7
LNVAEVTQSEIGQK		2.0981e-12	0.000276662	1	1	5	Q9HBI1	Q9HBI1 [133-146]		0	1515.8								359878						480429			138008			468428								114136						60723.8			74137.2
INSITVDNCK	1xCarbamidomethyl [C9]	3.8439e-10	0.000276662	1	1	10	Q01518	Q01518 [367-376]		0	1163.57	1.3261e+06	735794	1.2376e+06	264324	510248	439599	1.13417e+06	1.65709e+06	759014	862996		1.80533e+06	2.58054e+06	1.67177e+06	1.25741e+06	575210	1.3937e+06	641288	569336	1.76824e+06	291760	204423	784076	30882.8	152294	56861.9	447021	525550	261219	316598		491649	435645	211303	213798	525324	748689	290598
LNQALLDLHALGSAR		2.74218e-20	0.000276662	1	1	3	P02792	P02792 [107-121]		0	1591.89	22139.5				94196.1		198951	28682.3	200596			73638.5		51854.6	376079	1.0023e+06	451501	14408.7	271415	85939.7	4871				28114.8		78414.5	9096.64	69036.3			20054.1		6554.15	63945.1	915374	242544	6529.25
INPLALKESVK		1.6609e-06	0.000276662	1	1	2	P04114	P04114 [2819-2829]		1	1211.74	381624	1.7919e+06	1.8804e+06	247415	574410		504810	1.23665e+06	1.21167e+06	661768		913889		1.62085e+06	490578	3.1832e+06	1.4036e+06		1.05658e+06	1.41855e+06	83962.6	497836	1.19132e+06	28907.1	171445		198966	392206	417002	242776		248882		204867	83413.4	2.90714e+06	754005
INNQLTLDSNTK		8.7493e-17	0.000276662	1	1	37	P04114	P04114 [2877-2888]		0	1360.71	9.22267e+07	7.84627e+07	2.19543e+08	6.45024e+06	2.5505e+07	4.76394e+06	7.33399e+07	4.35378e+07	1.09641e+08	5.3169e+07	1.20148e+07	8.05068e+07	6.28167e+06	1.34836e+08	2.25434e+07	1.98775e+08	1.4324e+08	2.03984e+07	1.14876e+08	3.64117e+07	2.02912e+07	2.1799e+07	1.3909e+08	753625	7.61251e+06	616213	2.89062e+07	1.38081e+07	3.77336e+07	1.95055e+07	454896	2.19246e+07	1.06047e+06	1.70426e+07	3.83308e+06	1.81536e+08	7.69478e+07	9.24348e+06
INVGGGLSGDHCK	1xCarbamidomethyl [C12]	2.10472e-10	0.000276662	1	1	4	P07357	P07357 [388-400]		0	1313.63	720740	810308	442050	637739	826709	1.19524e+06	1.02642e+06	1.22615e+06	979906	1.07286e+06		2.52963e+06	161777	638551	1.02881e+06	1.75641e+06	857926	88059.4	9459155	1.12165e+06	158573	225125	280059	74511.4	246749	154604	404552	388878	337240	393588		688899	27311	80709.6	174929	1.60409e+06	460873	39903.9
LPGDIQVVPIGVGPNANVQELER		3.35487e-39	0.000276662	1	1	34	P04275	P04275 [1619-1641]		0	2414.3	2.21686e+07	5.39631e+07	6.16262e+06	6.172e+06	1.32256e+08	1.34227e+08	5.52324e+07	9.16099e+07	1.0858e+08	1.52531e+08		1.40184e+08		2.29996e+07	6.38483e+07	1.66957e+08	3.46234e+07	3.03779e+08	122597037	1.12881e+07	4.8774e+06	1.49924e+07	3.9043e+06	721117	3.94748e+07	1.73622e+07	2.17693e+07	2.90543e+07	3.73685e+07	55957564		3.81766e+07		2.90703e+06	1.08562e+07	1.52478e+08	18599503	137656807
IMNVIGEPIDER	1xOxidation [M2]	0.000109027	0.000276662	1	1	1	P06576	P06576 [144-155]		0	1401.7
LMIYEVSNRPSGVPDR	1xOxidation [M2]	5.63469e-06	0.000276662	1	1	20	A0A075B6J9	A0A075B6J9 [67-82]		0	1848.93	6.17111e+06	6.33892e+06	1.5255e+06	6.69227e+06	7.80474e+06	6.83397e+06	4.28773e+06	5.40321e+06	4.43423e+06	4.92466e+06		1.43422e+06	3.54005e+06	3.16236e+06	6.27812e+06	2.62447e+06	4.94868e+06	3.89784e+06	4.52777e+06	4.58176e+06	1.35773e+06	1.76112e+06	966474	781903	2329491	883971	1.68997e+06	1.71364e+06	1.52607e+06	1.80666e+06		390584	597628	399706	1.06747e+06	2.39686e+06	2.6584e+06	1.7663e+06
LLSNDEVTIK		8.70467e-07	0.000276662	1	1	8	Q92734	Q92734 [48-57]		0	1131.63	2.96614e+06	2.5859e+06	2.72552e+06	1.83987e+06	1.95345e+06	1.34897e+06	3.15576e+06	2.67817e+06	1.19791e+06	1.56745e+06		2.42193e+06		1.76256e+06	1.55009e+06	1.83069e+06	3.22117e+06		1395726	2.33173e+06	652593	718431	1726742	214965	583048	174488	1.24381e+06	849389	412267	575035		659569		222779	263563	1.67192e+06	1.7304e+06
LLSLGAGEFK		9.29e-10	0.000276662	1	1	16	P12259	P12259 [849-858]		0	1034.59	2.9919e+06	3.49435e+06	2.76169e+06	5.60314e+06	1.01633e+07	1.88857e+07	1.79813e+07	1.30047e+07	1.25072e+07	1.11548e+07		4.77624e+06		3.11835e+06	1.82011e+06	1.5751e+06	877083	2.62848e+06	1.48166e+06	7.57608e+06	658260	970822	1.74966e+06	654653	3.03346e+06	2.44285e+06	7087146	4.12447e+06	4.30443e+06	4.09225e+06		1.30072e+06		394144	309476	1.4385e+06	471164	1.19109e+06
LLSGGNTLHLVSTTK		6.66846e-16	0.000276662	1	1	27	P04114	P04114 [935-949]		0	1540.87	2.08186e+08	2.4528e+08	5.47825e+08	3.47435e+07	7.83075e+07	3.11659e+07	3.2488e+08	1.96726e+08	3.8937e+08	2.25656e+08		3.85575e+08	3.61185e+08	2.5047e+08	1.35136e+08	4.73662e+08	4.14056e+08	4.97498e+07	2.97623e+08	1.41308e+08	4.58039e+07	68145015	3.47072e+08	4.05931e+06	23372558	4031292	1.28048e+08	6.23921e+07	1.34004e+08	8.2784e+07		1.05004e+08	6.09749e+07	31658070	22977354	4.32584e+08	2.22429e+08	22543990
LLSGEDVGQDEGATR		0.000232176	0.000276662	1	1	3	P11277	P11277 [765-779]		0	1546.73	196505	396165					466861	163948	113743			565331		704232	341086		314429			231837	43233.9	110065					184008	51996.5	39145.2			153958		89011.3	57995.1		168909
IISDYHQQFR		1.9066e-15	0.000276662	1	1	28	P04114	P04114 [4487-4496]		0	1306.65	1.68131e+08	8.77977e+07	2.36836e+08	1.27083e+07	4.57832e+07	6.52803e+06	7.35333e+07	1.11265e+08	2.31709e+08	1.2445e+08		1.26986e+08	2.30837e+08	2.4888e+08	2.33157e+07	2.17055e+08	1.11272e+08	3.8343e+07	9.13983e+07	7.52068e+07	3.69911e+07	2.43925e+07	1.50047e+08	1.48479e+06	1.3665e+07	844397	2.89824e+07	3.52878e+07	7.97438e+07	4.56557e+07		3.45823e+07	3.89697e+07	3.14572e+07	3.9644e+06	1.98231e+08	5.97747e+07	1.7375e+07
LLSDFPVVPTATR		3.27724e-09	0.000276662	1	1	8	Q4LDE5	Q4LDE5 [109-121]		0	1415.79	300494	320000	187421	236043	236529	420171	611071	812495	332746	666824		1.16524e+06		916438	1.01557e+06	2.11933e+06	452782	3.25235e+06	1.85513e+06	1.19261e+06	66112.8	88904.3	118740	27578.5	70597	54348.9	240847	257685	114516	244631		317332		115833	172678	1.93553e+06	243232	1.47379e+06
LISVDTEHSNIYLQNGPDR		1.52985e-26	0.000276662	1	1	7	P00450	P00450 [44-62]		0	2171.07						379012		3.94005e+06	602598	753805		2.38868e+06	218806			392947	577216	1.29293e+06	1372099	668542						49025		1.24959e+06	207387	276540		650514	36938.7			358868	310077	585887
LLRDADDLQKR		1.44194e-10	0.000276662	1	1	3	P02649	P02649 [166-176]		2	1342.74	198507	2.57997e+06	254651		517336		653403	801689	568387	335559		100325		172116	138744	471588	712659		1.0565e+06	251082	43674.3	716783	161333		154410		257532	254258	195613	123103		27321.7		21754.6	23590.8	430689	382837
LLQQVSQIYQSIEFSR		7.06936e-19	0.000276662	1	1	7	Q14152	Q14152 [439-454]		0	1939.03	2.44526e+07	2.97753e+06		2.36345e+06		723454				238725					51865						5.37992e+06	827234		276137		93578.4				87578.6					8818.66
LLQIQPTQVSDSGR		0.00122404	0.000276662	1	1	5	Q8NDA2	Q8NDA2 [2702-2715]		0	1541.83		307770				694670	1.09285e+06									230852	348846		212354	1.24923e+06		85506.6				89855.2	430734									210832	187398
LIQEAPKPECEK	1xCarbamidomethyl [C10]	4.40793e-12	0.000276662	1	1	6	P20851	P20851 [193-204]		0	1441.74	1.67192e+07	1.42468e+07	1.08736e+07	1.47498e+07	1.23665e+07	1.10585e+07	7.77386e+06	1.9498e+07	1.0467e+07	1.32807e+07		1.40497e+07	1.06383e+07	1.17056e+07	1.89401e+07	1.09173e+07	8.21371e+06		11353280	6.32721e+06	3678459	3.95814e+06	6888909	1723317	3.69106e+06	1.43041e+06	3.06399e+06	6.18382e+06	3.60229e+06	4.87216e+06		3.82619e+06	1795944	1.47953e+06	3.2204e+06	9.97049e+06	4412361
LLQDFFNGK		0.00192659	0.000276662	1	3	5	P11142	P11142 [349-357]		0	1081.57		138685	397901	256611	248276		206813	1.49069e+06	161234	96360.2	201086	728329		124567	608353	414629	223678		978258	399997		38530.3	252089	29981.5	74103.2		81513.1	472776	55489.4	35350.6	7613.39	198348		15744.7	103439	378670	120158
LLQDEFPGIPSPLDAAVECHR	1xCarbamidomethyl [C19]	4.39138e-37	0.000276662	1	1	11	P02790	P02790 [131-151]		0	2364.17							4.90304e+06	7.05119e+06		6.49288e+06							1.54004e+06	1.05808e+07	5.25658e+06								1.93248e+06	2.2363e+06		2.38198e+06							827300	4.79466e+06
ILQDDLTCR	1xCarbamidomethyl [C8]	3.57732e-06	0.000276662	1	1	13	Q07954	Q07954 [2510-2518]		0	1133.56	1.91967e+06	2.58235e+06	1.36196e+06	2.19855e+06	2.2467e+06	1.35772e+06	1.95199e+06	1.18753e+06	2.23675e+06	1.06689e+06		1.73995e+06	4.20273e+06	2.94289e+06	3.34663e+06	1.40094e+06	957195	167934	68298.2	2.73554e+06	422354	717443	862864	256871	670576	175620	769357	376626	769792	391400		473846	709501	371966	569030	1.27944e+06	514200	76098.8
LLQTLETITNK		0.000651493	0.000276662	1	1	4	Q4LDE5	Q4LDE5 [942-952]		0	1273.74	111438		129924					295796							475328	855573		1.55973e+06	556587	738603	24518		82312.5					93812.3							80820.5	781373		706788
IMNGEADAMSLDGGFVYIAGK	1xOxidation [M]	7.33892e-07	0.000276662	1	1	3	P02787	P02787 [400-420]		0	2175.01					68172.4		85685.7	779807		136292		644218			77521.5	53119.7		84377.1	398236						20347.5		33772.1	247317		50000.1		175441			13181	48512.8		38235.2
ILTATIENNR		0.00112919	0.000276662	1	1	2	P13646	P13646 [166-175]		0	1144.63	653098						149106	294307		583387			1.21293e+08	181676			192211				143691						58768.6	93340.2		214021			20476586	22962.9			103255
ILTSDVFQDCNK	1xCarbamidomethyl [C10]	2.98483e-15	0.000276662	1	1	20	P04275	P04275 [1062-1073]		0	1439.68	2.82957e+06	2.62698e+06	1.27264e+06		9.58436e+06	7.26407e+06	6.10233e+06	7.50935e+06	7.94151e+06	9.03933e+06		6.4218e+06	1.62206e+06	7.30632e+06	5.53711e+06	6.44931e+06	3.23231e+06	1.6463e+07	5.71143e+06	7.06051e+06	622545	729842	806278		2.86066e+06	939603	2.40517e+06	2.38161e+06	2.73311e+06	3.31616e+06		1.74886e+06	273834	923482	941480	5.88999e+06	1.73638e+06	7.46015e+06
IMADSGPIYDK	1xOxidation [M2]	4.15837e-09	0.000276662	1	1	4	P07996	P07996 [1131-1141]		0	1225.58	313108	1.27249e+06		194946			292508	309453	627446	881515		2.53005e+06	2.30107e+06	1.61752e+06	1.19899e+06	484567	547935	140214	800584	1.06361e+06	68888.2	353532		22776.9			115289	98143.7	215939	323392		689013	388465	204447	203865	442543	294348	63537.4
IMADSGPIYDK		3.44596e-05	0.000276662	1	1	4	P07996	P07996 [1131-1141]		0	1209.58	303324	1.08029e+06	407317	100458	747802	149557	1.39084e+06	655838	658723	612300		1.4569e+06	2.31276e+06	984784	633757	1.26638e+06	832982	87213.3	1.3895e+06	988647	66735.6	300131	258054	11737.2	223197	19345.1	548185	208001	226703	224628		396762	390438	124472	107758	1.15656e+06	447473	39520.5
ILYSQCGDVMR	1xCarbamidomethyl [C6]; 1xOxidation [M10]	0.000822988	0.000276662	1	2	5	P60660	P60660 [27-37]		0	1357.62	233314	988527	173018	571339		429031	397870	940358	330946	240641		1.09261e+06	1.24221e+06	956503	787769	157616	270979		608328	1.20427e+06	51332.3	274638	109615	66753.4		55494.9	156816	298237	113897	88281.5		297552	209709	120897	133945	143947	145569
ILYSQCGDVMR	1xCarbamidomethyl [C6]	8.23416e-11	0.000276662	1	2	9	P60660	P60660 [27-37]		0	1341.63	309889	920176		438269		301070		1.35529e+06	434007		191863	1.58792e+06	994781	322049	1.85331e+06	539280		181499	1.74876e+06	838086	68179.9	255649		51206		38943.3		429833	149366		7264.2	432443	167938	40705.3	315120	492511		82245.8
LLYNNVSNFGR		0.000236729	0.000276662	1	1	7	Q00610	Q00610 [1216-1226]		0	1296.67	352448	415847	181903		524522			405125				354964		291557		460579	157694		767767	427478	77543.5	115533	115244		156555			128486				96668.3		36851.3		420635	84712.5
IIYGGSVTGATCK	1xCarbamidomethyl [C12]	6.4288e-06	0.000276662	1	1	6	P60174	P60174 [244-256]		0	1326.67	455615	588548	278409	395724	381585	725571	1.16948e+06	1.23635e+06	878615	287017		1.0995e+06		1.31726e+06	529832	379280	570518		251360	1.18469e+06	100242	163514	176385	46235.1	113892	93852.2	460939	392111	302380	105295		299429		166495	90087.8	346387	306479
ILTATVDNANVLLQIDNAR		2.65352e-06	0.000276662	1	1	4	P02533	P02533 [176-194]		0	2054.12			1.90816e+06		773791	743731	937849	482485	92163.3	136265						498596			283331				1.20891e+06		230954	96201.2	369643	153021	31718.5	49990.3						455355
LIYAASSLQSGVPSR		4.86972e-20	0.000276662	1	1	27	P01599	P01599 [69-83]		0	1548.84	5.06998e+06	5.15111e+06	5.85336e+06	4.5683e+06	1.32549e+07	4.90835e+06	4.5161e+06	5.04298e+06	3.49968e+06	8.18084e+06		1.10106e+07		2.68591e+06	7.59328e+06	5.48616e+06	4.5129e+06	1.66688e+06	4.60122e+06	4.88255e+06	1.11547e+06	1.43111e+06	3.70837e+06	533746	3.9562e+06	634893	1.77997e+06	1.59939e+06	1204434	3.00122e+06		2.99854e+06		339486	1.29109e+06	5.01037e+06	2.4243e+06	755343
LLVVDPETDEQLQK		4.36035e-10	0.000276662	1	1	6	O14745	O14745 [88-101]		0	1626.86	521425	599656		691126		1.67313e+06	533285	1.31609e+06	1.3539e+06	346644						135873	465613			1.06977e+06	114721	166600		80748.9		216418	210189	417400	465951	127170						124090	250125
LLVSASQDGK		0.0013578	0.000276662	3	4	11	Q9HAV0; P62873; P62879	Q9HAV0 [69-78]; P62873 [69-78]; P62879 [69-78]		0	1017.56	3.07071e+06	3.49296e+06	3.66697e+06	1.86953e+06	1.90729e+06	3.41437e+06	5.93535e+06	1.18258e+07	6.70614e+06	3.39497e+06		4.88225e+06	6.46755e+06	3.90574e+06	3.12317e+06	4.59179e+06	4.96877e+06	2.422e+06	2.36599e+06	7.46814e+06	675599	970434	2.32319e+06	218430	569272	441647	2.33936e+06	3.75057e+06	2307954	1.24548e+06		1.32959e+06	1.09185e+06	493666	531036	4.19356e+06	2.6692e+06	1.09752e+06
ILVDVSNPTEQEHLQHR		0.000413027	0.000276662	1	1	1	Q658P3	Q658P3 [110-126]		0	2015.03								599732				118762		95453.1					358491	137451								190206				32342.7		12064.8
LIVAMSSWLQK		1.72059e-09	0.000276662	1	1	6	P04114	P04114 [1230-1240]		0	1275.71	877030	226836	1.83453e+06		111947		577828	423102	241457	280037		3.59699e+06			178209	5.13799e+06	46090.8	49013.6	1.87596e+06		192959	63020.9	1.16226e+06		33412.9		227745	134188	83098.8	102734		979576			30301.1	4.6924e+06	24759.7	22210.4
ILTTASSHEFEHTKK		2.23279e-05	0.000276662	1	1	1	Q16851	Q16851 [39-53]		1	1728.89		54571.1	588652							110986		158234		347146	163177	1.09788e+06	434585			221329		15161.3	372938							40716.4		43092.4		43877.5	27745.1	1.00266e+06	233456
LLTSQDVSYDEAR		1.54655e-10	0.000276662	1	1	5	P11277	P11277 [1294-1306]		0	1496.72		291711		127002								466696	708276	644140	292089		283886	89095.1	85278.2	188781		81044.9		14838.5								127096	119571	81416	49664.2		152502	40373.2
LLVVDQETDEELR		1.29205e-13	0.000276662	1	1	1	Q15599	Q15599 [85-97]		0	1558.8
LYTLVLTDPDAPSR		1.70768e-06	0.000276662	1	1	3	P30086	P30086 [63-76]		0	1560.83
LPGIVAEGR		4.46218e-05	0.000276662	1	1	9	P01008	P01008 [383-391]		0	911.531	2.26484e+06	4.00216e+06	1.31845e+06	2.00259e+06	4.13395e+06	4.88355e+06	5.60611e+06	5.96207e+06	3.1419e+06	4.75353e+06		4.01871e+06		3.02029e+06	5.85463e+06	4.33611e+06	3.42517e+06	3.86637e+06	2.2248e+06	1.11506e+07	498296	1.1119e+06	835296	233976	1.23387e+06	631685	2.20959e+06	1.89088e+06	1.0813e+06	1.74388e+06		1.09443e+06		381749	995469	3.96006e+06	1.83998e+06	1.75204e+06
IPKPEASFSPR		6.43631e-05	0.000276662	1	1	1	Q14624	Q14624 [634-644]		0	1228.67	214451	375051	193857	200361	230874	146279	577587	532028	361770	146750		627783		113313	2.33472e+06	906850	450052			239453	47182.1	104199	122817	23409.5	68909.3	18921.2	227650	168734	124505	53836.5		170966		14322.2	396974	828203	241765
LRTEGDGVYTLNDK		1.44417e-18	0.000276662	2	2	14	P00739; P00738	P00739 [59-72]; P00738 [58-71]		1	1580.79	508859	917960	2.86018e+06	6.77839e+06	3.46884e+06	1.611e+06	1.04046e+06	1.61914e+06	1.38298e+06	1.98167e+06		4.87096e+06	2.88372e+06	2.56362e+06	1.60728e+07	2.04068e+06	1.27462e+06	2.18885e+06	6.96641e+06	1.82204e+06	111956	255033	1.81205e+06	791965	1.03535e+06	208382	410085	513514	475959	726995		1.32652e+06	486826	324029	2732874	1.8637e+06	684720	991872
LRSEIDNVKK		9.74903e-07	0.000276662	1	1	11	P04264	P04264 [408-417]		2	1201.69	7.29315e+07	7.56515e+07	4.51173e+07	2.14632e+08	5.95678e+07	2.19192e+08	4.96056e+07	3.07107e+07	1.00218e+08	3.06205e+07		764038	3.44042e+08	2.05308e+08	1.04548e+08	2.39798e+07	5.61469e+07		3.35957e+07	6.64707e+07	1.60459e+07	2.10179e+07	2.85839e+07	2.5077e+07	17779289	28352368	1.95515e+07	9.73996e+06	3.44906e+07	1.12334e+07		208072	5.80809e+07	2.59499e+07	1.77763e+07	2.19002e+07	3.01618e+07
LRSDENEQHLGVK		4.26294e-11	0.000276662	1	1	6	P48740	P48740 [524-536]		1	1524.78	155034	731019	320310	295263	538389	360780	894686	733783	403366	637695		451813		353196	697421	684396	600880	466784	894126	555365	34109.6	203096	202931	34497.6	160694	46666.7	352631	232721	138821	233944		123043		44642.1	118583	625041	322789	211522
LRQNADQCCPEYECVCDPVSCDLPPVPHCER	6xCarbamidomethyl [C8; C9; C14; C16; C21; C29]	2.59335e-07	0.000276662	1	1	1	P04275	P04275 [2312-2342]		1	3860.6																		480568																				217768
IRLENEIQTYR		1.63943e-13	0.000276662	1	1	25	P13645	P13645 [440-450]		1	1434.77	6.55105e+06	1.00258e+07	1.9688e+07	4.36548e+07	1.80371e+07	2.32308e+07	2.96404e+07	1.76057e+07	2.10288e+07	9.38432e+06			1.88025e+07	2.21659e+07	8.85698e+06	8.61854e+06	1.30382e+07	1.08968e+07	1.73578e+07	5.02447e+06	1.44132e+06	2.78544e+06	1.24733e+07	5.10048e+06	5.38357e+06	3.0049e+06	1.16825e+07	5.58369e+06	7.23719e+06	3.44272e+06			3.17422e+06	2.80166e+06	1.50596e+06	7871091	7.00406e+06	4.93784e+06
LREQLGPVTQEFWDNLEK		0.000162175	0.000276662	1	1	2	P02647	P02647 [84-101]		1	2202.12			4.17919e+06				749866			89915.7						3.54643e+06	59332.7		2.12881e+06	40022.1			2647709				295552			32986.4						3.23886e+06	31873.2
LRTEGDGVYTLNDKK		2.31424e-12	0.000276662	2	2	25	P00739; P00738	P00739 [59-73]; P00738 [58-72]		2	1708.89	1.54407e+06	3.92665e+06	1.10614e+07	2.60128e+07	1.81756e+07	7.01696e+06	3.29941e+06	7.11862e+06	4.3652e+06	4.78185e+06	112991	7.17981e+06	1.40446e+07	4.52203e+06	5.70098e+07	7.41429e+06	5.954e+06	1.08703e+07	29656776	1.12849e+07	339716	1.09092e+06	7.0079e+06	3039248	5.4249e+06	907640	1.30043e+06	2.25769e+06	1.50231e+06	1.75427e+06	4278.01	1.95529e+06	2.371e+06	571562	9693429	6.77128e+06	3.19845e+06	4.92584e+06
LRENELTYYCCK	2xCarbamidomethyl [C10; C11]	0.00057184	0.000276662	1	1	10	P13987	P13987 [79-90]		1	1648.75	1.17892e+06	832328	485026	433106	810836	468436	663949	1.99387e+06	1.81435e+06	1.44991e+06		911854	2.47856e+06	780455	388199	941459	575302	279822	711438	3.09445e+06	259379	231242	307286	50602.7	242011	60592	261688	632362	624417	531915		248327	418428	98645.5	66005.9	859810	309049	126800
LQVELDNVTGLLSQSDSK		1.90815e-10	0.000276662	1	1	4	P35579	P35579 [1278-1295]		0	1946.01							149482		196811						542614	120514			241230								58916.8		67733.7						92261.2	110062
LQSTTVMNPYMK	1xOxidation [M11]	2.07433e-05	0.000276662	1	1	2	P04114	P04114 [4542-4553]		0	1428.69	155614	120513	411077					184981	235336	136646		315277		219018		868748	319249		607768		34237.2	33481.7	260436					58667.3	80992.3	50129.8		85860.2		27682.7		793406	171499
LQSLTENLTK		5.34398e-06	0.000276662	1	1	5	P15924	P15924 [1706-1715]		0	1146.64	2.33623e+06	1.09351e+06	602036	1.50973e+06	833654	3.37406e+06	1.12788e+06	505732	1.12168e+06	334991		951309		2.18378e+06	782908	224045	600784		281698	677755	514003	303806	381417	176392	248822	436433	444543	160394	386034	122895		259072		276019	133119	204615	322738
LQSIGTENTEENRR		0.000102231	0.000276662	1	1	4	P04075	P04075 [44-57]		1	1646.81	1.19194e+06	1.56117e+06	1.34372e+06	2.50802e+06	911813	2.22345e+06	2.58552e+06	2.16909e+06	2.56204e+06	1.13251e+06		2.97461e+06	3.91705e+06	3.93075e+06	2.25583e+06	952652	1.27752e+06	703448	250000	2.99605e+06	262243	433734	851309	293028	272150	287602	1.01905e+06	687933	881741	415470		810083	661273	496827	383561	870033	686276	318765
LQQDVLQFQK		1.0001e-05	0.000276662	1	1	7	Q8NBJ4	Q8NBJ4 [134-143]		0	1246.68	5.83578e+06	1.75388e+07	1.77463e+06	909074	2.3229e+06	2.13249e+07			1.58327e+06						2.19097e+06		1.27692e+06				1.28395e+06	4.87273e+06	1.12431e+06	106213	693319	2.75837e+06			544892						372532		685953
IQPSGGTNINEALLR		1.87426e-17	0.000276662	1	1	17	P19823	P19823 [380-394]		0	1582.85	2.17235e+06	1.10426e+06	1.94446e+06		3.19635e+06	2.52876e+06	5.27906e+06	3.37384e+06	2.10084e+06	3.82211e+06		3.13313e+06	1.43239e+06	1.24763e+06	1.69816e+06	3.2876e+06	4.56428e+06		2706143	6.92338e+06	477946	306792	1231906		954020	327094	2.08068e+06	1.07002e+06	723017	1402178		853254	241815	157695	288740	3.00248e+06	2.45191e+06
LQVEPAVDTSGVQCYGPGIEGQGVFR	1xCarbamidomethyl [C14]	4.64742e-14	0.000276662	1	1	9	P21333	P21333 [1247-1272]		0	2763.34		288302	254226	119096	318303	158056	627193	582983	205164	125451		2.43974e+06	1.25444e+06	1.24791e+06	1.55236e+06	840715	101040	326549	489701			80097.7	161064	13914.7	95004.2	20444.4	247201	184894	70608.4	46023.1		664419	211773	157730	263949	767804	54277.9	147975
LQNNENNISCVER	1xCarbamidomethyl [C10]	5.75194e-12	0.000276662	2	2	9	P36980; Q03591	P36980 [120-132]; Q03591 [120-132]		0	1589.73	143972	288596	448889	863551		1.04574e+06	1.85891e+06	1.55414e+06	912662	996368		3.09464e+06		355190	439416	808597		710862	1.07369e+06	1.14984e+06	31675.9	80179.5	284392	100894		135266	732668	492899	314098	365527		842770		44894.3	74714.4	738471		322125
LRTEGDGVYTLNNEK		1.12498e-21	0.000276662	1	1	23	P00738	P00738 [117-131]		1	1708.85	2.42946e+06	1.79231e+07	4.71077e+07	1.19638e+08	6.7366e+07	4.6004e+07	1.73541e+07	2.95488e+07	1.86774e+07	2.34529e+07		8.09127e+07	5.43169e+07	4.40705e+07	2.76142e+08	2.22641e+07	2.43762e+07		127182419	4.34927e+07	534515	4.97951e+06	29844896	1.39781e+07	2.01068e+07	5.95059e+06	6.83993e+06	9.37146e+06	6.42793e+06	8.60391e+06		2.20351e+07	9.16973e+06	5.57029e+06	4.69527e+07	2.03332e+07	1.30948e+07
LSAHCSCDSR	2xCarbamidomethyl [C5; C7]	2.64746e-05	0.000276662	1	1	13	P01137	P01137 [219-228]		0	1192.48	292719	224439			1.35917e+06	9385.35	1.33598e+06	562014	1.02044e+06	753463		2.08623e+06		2.38568e+06	3.16861e+06	921318	676226	676988	784772	2.9836e+06	64402.3	62355			405673	1213.99	526564	178244	351188	276415		568147		301538	538762	841416	363265	306775
LSGGLGAGSCR	1xCarbamidomethyl [C10]	1.08376e-09	0.000276662	1	1	10	Q04695	Q04695 [31-41]		0	1034.5	1.82877e+06	736693	701528	679389	756617	1.59794e+06	1.98285e+06	393842	682640	539055		408415	2.06177e+06	1.92989e+06	974331	511476	2.262e+06	287756	365731	1.20024e+06	402354	204672	444450	79377.6	225828	206693	781519	124908	234934	197757		111224	348066	243929	165666	467118	1.21513e+06	130396
LSGEAYGFVAR		4.25231e-07	0.000276662	1	1	12	P04275	P04275 [129-139]		0	1169.59		3.4876e+06		1.08887e+06	2.06299e+06	569507	2.29135e+06	1.36891e+06	744535	759739		1.86242e+06	219525	369822		324830	1.84627e+06	939159	645599	557843		968946		127220	615745	73665.4	903113	434153	256236	278718		507197	37059.9	46743.6		296659	991804	425577
ISEILLDHGAPIQAK		2.95719e-21	0.000276662	1	1	11	P16157	P16157 [287-301]		0	1604.9	515507	823192			970439	1.41794e+06	1.53021e+06	892318	809897	677111		1.9886e+06	1.8045e+06	2.34997e+06	2.11086e+06		1.31495e+06	568069	144683	377274	113419	228704			289648	183410	603118	283001	278730	248404		541560	304634	297024	358912		706385	257419
LSEGVTISYK		0.000227697	0.000276662	1	1	2	P05556	P05556 [389-398]		0	1096.59			341280						153042	123234		439734				306745			209296				216216						52670.3	45209.6		119754				280142
LSEGASYLDHTFPAEK		3.40705e-11	0.000276662	1	1	1	P12259	P12259 [122-137]		0	1764.84		1.35358e+06					503636			620059		441548				406392	295443		327446			376058					198503			227475		120248				371147	158710
LSEDYGVLK		0.00109864	0.000276662	1	1	11	P32119	P32119 [111-119]		0	1023.54	2.271e+06	4.4665e+06	653963	3.26723e+06	1.11362e+06	1.56867e+06	4.15284e+06	1.44586e+06	1.58165e+06	364961		3.56813e+06	3.83868e+06	3.19161e+06	1.36386e+06	593457	3.86933e+06		720836	2.41274e+06	499651	1.24091e+06	414316	381733	332382	202907	1.6368e+06	458557	544333	133889		971718	648042	403403	231899	541989	2.07858e+06
LSAEDLVLEGAGLR		0.000435424	0.000276662	1	1	4	P11047	P11047 [590-603]		0	1442.78		88634.2	98520.4		106255		150901		171434	108589						310030	37154.7	217110	189942	108860		24624.9	62417.2		31714		59476		59000.1	39836.7						283143	19959.3	98382.8
LSEAEFEVLK		1.11455e-09	0.000276662	1	1	48	P04275	P04275 [1288-1297]		0	1164.61	2.75694e+08	3.09074e+08	1.84034e+08	6.08666e+07	4.80166e+08	3.4265e+08	3.44327e+08	4.06922e+08	6.06902e+08	7.1654e+08	613533	3.02495e+08	3.40264e+08	2.54882e+08	2.41475e+08	6.81935e+08	2.52215e+08	1.06003e+09	5.98326e+08	2.74152e+08	6.06565e+07	8.58687e+07	1.16594e+08	7.11146e+06	1.43316e+08	44321536	1.35713e+08	1.29056e+08	2.08869e+08	2.6287e+08	23229.2	8.23791e+07	57443096	3.22158e+07	4.10582e+07	6.22794e+08	1.35488e+08	4.80348e+08
LSDAGQYLCQAGDDSNSNKK	1xCarbamidomethyl [C9]	9.17468e-18	0.000276662	1	1	6	P01833	P01833 [212-231]		1	2170.97	2.59612e+06	982252	1.43162e+06	1.73112e+06	3.1043e+06	1.28937e+06	2.67716e+06	1.41169e+06	1.10766e+06	2.88908e+06		1.23392e+06		740056	1.25387e+06	560251	1.56395e+06		2.18332e+06	2.15818e+06	571182	272895	907000	202258	926544	166780	1.05518e+06	447721	381208	1.05988e+06		336036		93539.3	213196	511663	840146
LSDAGITPLFLTR		1.2141e-17	0.000276662	1	1	10	P12111	P12111 [2533-2545]		0	1403.79	676851	1.10738e+06	1.46974e+06	497176	726191	1.52957e+06	1.41238e+06	2.08602e+06	1.77237e+06	1.0436e+06			969009	892648	671469	474379	840691		692458	604412	148917	307660	931148	58088.4	216747	197850	556675	661587	609972	382853			163587	112826	114170	433238	451614
LSCLGASLQK	1xCarbamidomethyl [C3]	6.4288e-06	0.000276662	1	1	6	Q9HC84	Q9HC84 [781-790]		0	1076.58	289974	377515	3.53899e+06	571628	1.98419e+06	233040		391830	293896	502450		102018		620068	2.99922e+06	2.09523e+06	370446		596170	284888	63798.4	104884	2.24211e+06	66787.2	592224	30143.5		124270	101146	184329		27782.9		78373.4	509960	1.91352e+06	199001
ISCGPPAHVENAIAR	1xCarbamidomethyl [C3]	2.7507e-18	0.000276662	1	1	1	Q4LDE5	Q4LDE5 [3414-3428]		0	1591.8	453894	278402	118187	328643	217985	534837	490527	474188	211623	311289		552637		592312	781155	1.10238e+06			663097	1.00563e+06	99863.1	77347.2	74876.7	38397.6	65062.4	69180.8	193336	150390	72831.1	114199		150501		74865.2	132821	1.00678e+06
LSCAASGFTFDDYAMHWVR	1xCarbamidomethyl [C3]	3.42042e-22	0.000276662	1	2	2	P0DP04	P0DP04 [39-57]		0	2233.98									55270.4							521883			853987	43363.7									19021.6							476622
ISASAEELR		0.000750837	0.000276662	1	1	14	P06727	P06727 [256-264]		0	975.511	1.38319e+07	2.82911e+07	1.68361e+07	6.02086e+06	9.90564e+06	1.58691e+07	2.10204e+07	3.28892e+07	2.02353e+07	1.99598e+07	9.83538e+06	3.61213e+07	9.29773e+06	7.25156e+06	6.35085e+06	3.92902e+06	1.39194e+07		2.76507e+07	9.24555e+07	3.04322e+06	7.85999e+06	10666471	703458	2.95655e+06	2052658	8.28498e+06	1.04309e+07	6.96411e+06	7322439	372381	9837008	1.56963e+06	916561	1.07984e+06	3.58828e+06	7.47741e+06
LSDGVAVLK		0.000223293	0.000276662	1	1	1	P10809	P10809 [397-405]		0	901.535	341985	239028		597855	130286	279384	175201	152506	195064	116516		1.28627e+06			151125			59201.5		122960	75241.6	66408.2		69851.4	38886.7	36138.2	69053.5	48367.7	67132.3	42745.2		350292			25695.9			26827
IPGTCCDTCEEPECNDITAR	4xCarbamidomethyl [C5; C6; C9; C14]	9.24658e-22	0.000276662	1	1	32	P04275	P04275 [2711-2730]		0	2397.94	4.91565e+07	4.85465e+07	2.25203e+07	1.80589e+07	8.98371e+07	8.78795e+07	5.09543e+07	6.35018e+07	4.17075e+07	8.2437e+07	3.08659e+07	4.3056e+07	5.96269e+07	4.28932e+07	3.08721e+07	8.87095e+07	3.06015e+07	2.6554e+08	72372880	3.54505e+07	10815115	13487484	14267659	2109948	26813798	11367169	20083112	20139754	14353860	30242800	1.16863e+06	11725528	10066162	5421482	5249205	8.10162e+07	16438962	1.20329e+08
IQNILTEEPK		3.7878e-05	0.000276662	1	1	8	P27169	P27169 [307-316]		0	1184.65	201066	783788	773688	427358	301622	426259	674999	581426	777556	615223		1.29058e+06	3.17466e+06	114550	138213	640080	1.10729e+06	441525	973739	1.10471e+06	44237.3	217757	490167	49931.1	90025.6	55136.4	266044	184401	267600	225700		351468	535943	14478.6	23500.5	584569	594830	200076
IQLVEEELDR		5.38978e-09	0.000276662	3	4	16	P67936; P09493; P06753	P67936 [56-65]; P09493 [92-101]; P06753 [93-102]		0	1243.65	1.10501e+06	831790		1.55266e+06	3.55715e+06	3.57971e+06	5.73327e+06	3.70926e+06				6.73312e+06		1.52241e+07	4.67982e+06	837113	2.01704e+06		825662	3.80737e+06	243118	231093		181408	1.06171e+06	463033	2.25971e+06	1.1764e+06				1.83365e+06		1.92425e+06	795715	764514	1.08354e+06
LPVVLANGQIR		0.000118713	0.000276662	1	1	17	Q9Y6R7	Q9Y6R7 [1338-1348]; [2539-2549]; [3740-3750]		0	1179.72	1.11552e+06	1.18019e+06	1.37817e+06	804541	449168	467662	602023	1.73884e+06	2.27696e+06	1.10361e+06		667366		1.82136e+06	1.83664e+06	536470	2.05931e+06	566448	750181	737383	245431	327888	873135	94000	134064	60491.8	237281	551476	783628	404870		181745		230211	312285	489944	1.10625e+06	256685
LPVSLSEGR		0.000641099	0.000276662	1	1	12	Q9Y6R7	Q9Y6R7 [559-567]		0	957.536	1.56876e+07	9.18625e+06	1.24379e+07	4.29441e+06	6.88215e+06	2.76119e+06	6.13505e+06	7.5227e+06	1.5959e+07	7.53961e+06		6.0927e+06	1.71838e+07	1.13542e+07	9.08257e+06	6.77687e+06	1.42261e+07		6.12068e+06	5.34221e+06	3.45149e+06	2.55218e+06	7879980	501745	2.05412e+06	357159	2.41806e+06	2385842	5492385	2.76598e+06		1.65924e+06	2900951	1.43512e+06	1.54432e+06	6189141	7.64218e+06
LPVGSQCSVDLESASGEK	1xCarbamidomethyl [C7]	3.31316e-29	0.000276662	1	1	29	P24821	P24821 [58-75]		0	1862.88	3.42908e+06	2.22247e+06	535895	6.06503e+06	2.50528e+06	3.48535e+06	1.04221e+06	3.81792e+06	1.85921e+06	1.72535e+06		936206		2.99501e+06	1.04937e+07	1.15396e+06	2.60221e+06	2.53945e+06	960375	3.61896e+06	754445	617459	339514	708619	747754	450828	410776	1.21086e+06	639857	632963		254959		378554	1.78426e+06	1.05388e+06	1397891	1.15075e+06
LPVANPQACENWLR	1xCarbamidomethyl [C9]	4.46005e-09	0.000276662	1	1	13	P00736	P00736 [612-625]		0	1667.83		248065			354504		756862	1.72236e+06	1.06569e+06	1.08582e+06		1.12673e+06				960511	1.0111e+06		1.11197e+06	1.18974e+06		68918.8			105809		298309	546250	366763	398342		306845				877211	543157
LPTDSELAPR		2.47653e-09	0.000276662	1	1	10	P49908	P49908 [289-298]		0	1098.58	4.96123e+06	4.30124e+06	4.45037e+06	3.18576e+06	3.80888e+06	3.01476e+06	4.56828e+06	5.81127e+06	3.9955e+06	4.64693e+06		5.25472e+06	2.51093e+06	2.03622e+06	2.74161e+06	2.03828e+06	4.11887e+06	2.60706e+06	3.29027e+06	4.16556e+06	1.09154e+06	1194996	2.81951e+06	372214	1.13684e+06	389958	1.80054e+06	1843058	1.37507e+06	1.70477e+06		1.43103e+06	423892	257367	466158	1861510	2.21264e+06	1.18138e+06
IPSVQINFK		1.75574e-06	0.000276662	1	1	41	P04114	P04114 [2626-2634]		0	1045.6	8.02819e+07	7.41971e+07	1.86077e+08	9.32797e+06	2.30281e+07	5.81257e+06	4.32342e+07	5.61853e+07	1.05335e+08	6.84337e+07		8.47375e+07	1.40751e+08	8.54024e+07	2.55689e+07	1.46897e+08	8.67974e+07	1.53467e+07	51204474	4.15463e+07	1.76631e+07	2.06139e+07	117888514	1.08985e+06	6.87323e+06	751853	17040312	1.78193e+07	36251508	25105545		23076759	2.37614e+07	1.07944e+07	4.3475e+06	134157484	46627097	6954312
LPYTIITTPPLK		1.62684e-09	0.000276662	1	1	14	P04114	P04114 [3137-3148]		0	1356.81	3.10201e+07	1.94942e+07	6.57682e+07	3.03273e+06	9.96362e+06	2.62056e+06	1.85385e+07	2.29139e+07	3.78452e+07	2.33252e+07		4.30249e+07		3.69598e+07	1.14876e+07	7.55764e+07	3.40891e+07		42170883	1.13368e+07	6.82486e+06	5.41601e+06	41667155	354334	2.97386e+06	338969	7.30675e+06	7.26719e+06	1.30246e+07	8557064		1.17171e+07		4.67154e+06	1.95324e+06	69022013	1.83125e+07
IPSGAFEDLENLK		3.7878e-05	0.000276662	1	1	1	Q92626	Q92626 [101-113]		0	1432.73	259734		358732										272853			273183			402095		57145.1		227273										46062.7			249491
LPPNVVEESAR		2.10472e-10	0.000276662	1	1	52	P01023	P01023 [935-945]		0	1210.64	5.33918e+07	3.2434e+07	2.28416e+07	1.68304e+07	2.64675e+07	1.21335e+07	2.21709e+07	2.52194e+07	3.02885e+07	2.96392e+07		1.58171e+07	5.50062e+07	4.41243e+07	3.6216e+07	2.05939e+07	1.46936e+07	3.0054e+07	18513970	2.60118e+07	11746949	9.01099e+06	1.44712e+07	1.96641e+06	7.8998e+06	1.56947e+06	8.73841e+06	7.99839e+06	1.0424e+07	1.08734e+07		4.3075e+06	9.28609e+06	5577090	6.15784e+06	18807904	7.8933e+06	13618875
IPPDSEATLVLVGR		0.0016487	0.000276662	1	1	3	P02730	P02730 [220-233]		0	1466.82	450869	405438	315366				563077	945460	864263	885917				2.44116e+06	323390	463258	774498		413298	1.24258e+06	99197.4	112641	199799				221931	299855	297441	325007				308550	54986.4	423082	416056
IPLYYPNAGLTR		4.54748e-10	0.000276662	1	1	14	P08519	P08519 [3931-3942]		0	1377.75	1.33668e+06	3.54584e+06	1.41061e+07	277399	1.60132e+06	1.64193e+06	4.24301e+06	5.0675e+06	3.61033e+06	1.96053e+06		4.99473e+06	2.63186e+06	6.30405e+06	1.73583e+06	2.74498e+06	4.85287e+06	882492	5.22263e+06	985981	294088	985126	8.93688e+06	32410.4	477949	212382	1.67234e+06	1.60717e+06	1.24251e+06	719240		1.36023e+06	444308	796800	295145	2.50692e+06	2.60694e+06	399899
IPLVTNEECQK	1xCarbamidomethyl [C9]	5.22823e-09	0.000276662	1	1	5	P03951	P03951 [537-547]		0	1330.67	173712	250204	156193	447876	349155	489130	412234	1.76942e+06	350193	656040		1.45881e+06			411564	530476	386028		262198	698146	38219	69513.1	98955.2	52328.4	104213	63268.7	162478	561175	120521	240674		397280			69978.6	484470	207372
LPLEYSYGEYR		7.50576e-12	0.000276662	1	1	5	P07358	P07358 [324-334]		0	1389.67																586825		112512	3737868																	535933		50984.6
IPIEDGSGEVVLSR		6.05537e-24	0.000276662	1	1	32	P01024	P01024 [291-304]		0	1470.78	4.91987e+06	6.05993e+06	9.94456e+06	1.75125e+07	6.67434e+06	8.26731e+06	1.34916e+07	8.70236e+06	1.17817e+07	1.27183e+07		1.69593e+07	1.06452e+07	3.75992e+06	6.57424e+06	1.10237e+07	1.17101e+07	1.18617e+07	1.27851e+07	6.79207e+06	1.08244e+06	1.68361e+06	6.30034e+06	2.04611e+06	1.9921e+06	1.06937e+06	5.31757e+06	2.75997e+06	4.05474e+06	4.66581e+06		4.61857e+06	1.79711e+06	475234	1.11782e+06	1.00677e+07	6.29062e+06	5.3751e+06
LPQQANDYLNSFNWER		1.11455e-09	0.000276662	1	1	5	P04114	P04114 [2118-2133]		0	1994.94	1.0649e+06	1.46457e+06	2.05346e+07	1.20517e+06	2.07031e+06	676573	3.38089e+06	3.73472e+06	4.13576e+06	4.06556e+06		7.84449e+06	916306	606150	321165	1.72784e+07	3.28487e+06		10058545		234292	406896	13009634	140809	617929	87514.3	1332544	1.18447e+06	1.42334e+06	1491490		2.13631e+06	154690	76614.3	54607.9	15779952	1.76461e+06
IQLVEEELDRAQER		0.00105383	0.000276662	3	4	2	P67936; P09493; P06753	P67936 [56-69]; P09493 [92-105]; P06753 [93-106]		1	1727.89													787812																				132998
LPYTIITTPPLKDFSLWEK		1.24579e-32	0.000276662	1	1	2	P04114	P04114 [3137-3155]		1	2262.24
LQAEISNVK		0.00141003	0.000276662	1	1	8	Q7Z794	Q7Z794 [392-400]		0	1001.56	1.34591e+06	1.19586e+06	462727	2.94597e+06	521963	1.8491e+06	1.2815e+06	334891	805272	1.04687e+06		475995	5.51731e+06	3.75133e+06	1.70616e+06	178932	872918	120015	483620	359917	296118	332240	293159	344198	155791	239180	505090	106211	277139	384054		129629	931427	474149	290100	163414	468927	54384.6
LQHLENELTHDIITK		2.30532e-19	0.000276662	1	1	10	P01009	P01009 [284-298]		0	1803.96		655641	4.81427e+06	270163	4.12226e+06	577781	8.60182e+06	5.92871e+06	4.30169e+06	7.43219e+06		5.93857e+06			563934	2.1738e+07	1.71069e+07	1.84128e+07	27467193	4.26504e+06		182154	3.05006e+06	31565	1.23038e+06	74735.7	3.39032e+06	1.8803e+06	1.48045e+06	2.72657e+06		1.61726e+06			95886.2	19852799	9189722	8.34373e+06
IQHGQCAYTFILPEHDGNCR	2xCarbamidomethyl [C6; C19]	3.57356e-07	0.000276662	1	1	1	Q15389	Q15389 [36-55]		0	2416.09			98966.1													695041	486967	110897	523383				62699.6													634764	261596	50252.8
LQGTLPVEAR		1.44492e-06	0.000276662	1	1	8	P01031	P01031 [1129-1138]		0	1083.62	292782	341034	526939	142723		254666	814549	489583	669170	610378		1.22884e+06		399795	1.07436e+06	2.53374e+06	895156	1.02163e+06	8926310	1.34221e+06	64416	94748.2	333840	16675.3		32940.9	321046	155272	230299	223923		334654		50532.1	182674	2.314e+06	480873	462951
LQGSVTVTCR	1xCarbamidomethyl [C9]	4.04349e-09	0.000276662	1	1	8	Q9BXR6	Q9BXR6 [484-493]		0	1120.58	520423	908116	497410	880981		1.19912e+06	2.87076e+06	1.38105e+06	1.82368e+06	1.50383e+06		1.84763e+06		366076	2.50883e+06	3.28057e+06	1.0084e+06		2.465e+06	1.0333e+06	114500	252298	315132	102931		155106	1.13148e+06	438004	627630	551693		503168		46270.2	426578	2996058	541705
LQGEIAHVKK		0.000620689	0.000276662	1	1	3	P35908	P35908 [406-415]		1	1122.66		119256	35613.3	827231		335672	58564.8	267636	120581	73020.7			3.03711e+07	2.16869e+06	260183		97129.2		301040	129490		33132.5	22562.7	96651		43418.9	23082.7	84881.3	41498.7	26788.3			5.12722e+06	274111	44239.2		52177.3
LQGAHLTSILSHEEQMFVNR	1xOxidation [M16]	5.80149e-11	0.000276662	1	1	8	P13611	P13611 [3199-3218]		0	2326.16	28345.5	150483	90064.7	131695			32553.8	42069.7		95542.8						3.37178e+06	45977.7	254255	3.55473e+06	82861	6236.41	41808.1	57060.1	15386.8			12830.7	13342.5		35050.8						3.07936e+06	24699	115215
LQAEAFQAR		1.39794e-07	0.000276662	1	1	44	P02649	P02649 [270-278]		0	1033.54	6.65384e+08	1.79781e+09	1.06177e+09	1.98765e+08	1.23688e+08	2.31275e+08	9.57681e+08	6.73576e+08	8.44427e+08	3.98607e+08	7.87581e+07	7.74654e+08	4.04199e+08	3.32248e+08	1.14399e+08	4.9535e+08	8.12363e+08	3.26486e+08	6.40583e+08	7.10757e+08	1.46394e+08	4.99479e+08	6.72677e+08	2.32231e+07	3.69172e+07	2.99153e+07	3.7746e+08	2.13626e+08	2.90614e+08	1.46233e+08	2.98189e+06	2.10963e+08	6.82366e+07	4.19944e+07	1.94514e+07	4.52391e+08	4.36397e+08	1.47946e+08
LQGAHLTSILSHEEQMFVNR		6.44577e-08	0.000276662	1	1	2	P13611	P13611 [3199-3218]		0	2310.17																745773			705065																	681096
LQETSNWLLSQQQADGSFQDPCPVLDR	1xCarbamidomethyl [C22]	5.92915e-15	0.000276662	1	1	5	P0C0L4	P0C0L4 [1100-1126]		0	3132.47			1.0957e+06		279797		256680	1.2556e+06	128829	1.16914e+06					260935	2.77104e+06			2.2396e+06				694173		83511.4		101168	398216	44337.2	428909					44367	2.53072e+06
LQETSNWLLSQQQADGSFQDLSPVIHR		1.3166e-37	0.000276662	1	1	9	P0C0L5	P0C0L5 [1100-1126]		0	3097.53			1.71085e+06							450429						3.52246e+06		232993	1.01834e+07				1.0839e+06							165244						3.21697e+06		105580
LQDFSDQLSDYYEK		6.21742e-16	0.000276662	1	1	1	P04114	P04114 [4499-4512]		0	1750.78		98049.3	176883										257475			244919			136394			27240.6	112064										43466.6			223678
LQATVQELQK		0.00130668	0.000276662	1	1	6	P31146	P31146 [440-449]		0	1157.65	761365	2.31318e+06	739618	1.31555e+06	1.65212e+06	1.29258e+06	1.3575e+06	3.21887e+06	2.84265e+06	1.0964e+06		1.04862e+06	2.70516e+06	2.42074e+06	836178				516874	2.06102e+06	167511	642660	468582	153704	493110	167195	535045	1.02087e+06	978314	402226		285573	456683	305969	142176
IQALSLCSDQQSHLEFR	1xCarbamidomethyl [C7]	8.21529e-26	0.000276662	1	1	23	P07225	P07225 [562-578]		0	2031.99	1.09949e+06	3.18169e+06	1.44987e+07	6.75071e+06	5.66427e+06	4.30646e+06	3.86976e+06	9.47728e+06	6.81795e+06	8.47183e+06		1.18463e+07		1.0611e+06	1.19905e+07	1.94399e+07	1.68238e+06	2.49795e+06	1.76054e+07	2.39707e+06	241902	883956	9.18556e+06	788731	1.69062e+06	557038	1.52522e+06	3.00574e+06	2.34644e+06	3.10797e+06		3.22613e+06		134118	2.03875e+06	1.7754e+07	903767	1.13194e+06
IQALQQQADEAEDR		5.69856e-18	0.000276662	1	1	7	P67936	P67936 [14-27]		0	1614.77	127994	180880			378294	518132	667653	350015	115402	67185.6		952403	3.46857e+06	3.64801e+06	1.82227e+06	155954	350531			749281	28160.6	50253.2			112910	67020.1	263148	111008	39716.2	24647.7		259370	585560	461090	309842	142429	188303
IQEVAGSLIFR		0.000553156	0.000276662	1	1	3	Q9HD89	Q9HD89 [32-42]		0	1232.7							736697	127681	682654			270065				62744.4	128448	371951	1.2897e+06	837126							290361	40494.3	234939			73547.3				57302.9	69001.5	168549
IYTSPTWSAFVTDSSWSAR		3.07214e-10	0.000276662	1	1	2	Q08380	Q08380 [408-426]		0	2162.02
MAAAAKPNNLSLVVHGPGDLR	1xMet-loss+Acetyl [N-Term]	0.000534952	0.000276662	1	1	2	Q00796	Q00796 [1-21]	Q00796 1xMet-loss+Acetyl [N-Term]	0	2042.11																	120571																				64770.2
MADEAGSEADHEGTHSTK		1.93371e-33	0.000276662	1	1	9	P02671	P02671 [603-620]		0	1872.77	470245			1.6112e+06	2.61949e+06	1.48239e+06	951860	1.93679e+06	262618	492694		1.32534e+06		785558	1.6618e+06	8.51452e+06	963869	2.14227e+07	3.87132e+06	3.86353e+06	103460			188248	781844	191747	375166	614257	90381.5	180749		360932		99290.6	282557	7.7761e+06	517785	9707633
NTIEETGNLAEQAR		0.00011138	0.000276662	1	1	1	P11047	P11047 [1122-1135]		0	1545.75	175624					521639	223768	668681				343274			269987	178507	247426		162813	486137	38639.7					67473.7	88195.7	212074				93484.5			45906.1	163026	132916
NTIAECQACGPLK	2xCarbamidomethyl [C6; C9]	3.61173e-14	0.000276662	1	1	3	P35443	P35443 [253-265]		0	1461.68	93844.2	242216	164422	140922	381928	227494	627856	238739	387683	339758				215709			170253	34754	1051286	481847	20647	67293.9	104169	16464.9	113995	29426.2	247463	75716.7	133423	124643				27264.5			91458.8	15748.7
NTGIICTIGPASR	1xCarbamidomethyl [C6]	6.5044e-14	0.000276662	1	1	12	P14618	P14618 [44-56]		0	1359.7	1.34892e+06	830082	429985	914454	929580	943547	813914	1.67902e+06	1.30344e+06	538951		3.07948e+06	3.39455e+06	1.84832e+06	1.19862e+06	1.11111e+06		109827	496407	1.67867e+06	296782	230618	272415	106842	277453	122047	320796	532504	448586	197719		838641	573065	233618	203802	1.01475e+06		49767.6
NTFAEVTGLSPGVTYYFK		1.92462e-09	0.000276662	1	1	4	P02751	P02751 [959-976]		0	1993.99
NTEQEEGGEAVHEVEVVIK		6.37426e-18	0.000276662	1	1	1	P00742	P00742 [292-310]		0	2096.01		341344	119061		295542		517487	94964.8			411396	321863				4.6425e+06	326153					94834.1	75430.4		88210.7		203962	30118.3			15576	87653.8				4.23988e+06	175208
NTEILTGSWSDQTYPEGTQAIYK		6.44577e-08	0.000276662	1	1	6	P08603	P08603 [29-51]		0	2602.23			356358	218612	546497	364378	317714	995213	410485	340505		537196	273231			374142	242525	285810	399644				225769	25541.9	163114	47132	125224	315634	141271	124917		146296	46126.7			341695	130283	129514
NTLELSNGVIVK		7.9383e-12	0.000276662	1	1	37	P04114	P04114 [2865-2876]		0	1286.73	5.05995e+07	3.48839e+07	1.27648e+08	1.22843e+07	1.05822e+07	3.56664e+06	2.23733e+07	3.18493e+07	6.41155e+07	3.3521e+07		5.50114e+07	3.90441e+07	4.41405e+07	8.61281e+06	1.0442e+08	6.14904e+07	1.19033e+07	7.83318e+07	1.84698e+07	1.11326e+07	9.69166e+06	8.08706e+07	1.43526e+06	3.15847e+06	461343	8818213	10101090	2.20657e+07	12297500		1.49814e+07	6.5914e+06	5579135	1.46444e+06	9.53639e+07	3.30323e+07	5.39396e+06
NTDQASMPDNTAAQK	1xOxidation [M7]	2.95923e-06	0.000276662	1	2	1	P35579	P35579 [359-373]		0	1607.7
NTAYLQMNSLK	1xOxidation [M7]	0.000326558	0.000276662	1	1	5	A0A0B4J1V6	A0A0B4J1V6 [98-108]		0	1298.64	1.01006e+06		454410	321215	553120	503317	278638	275493	312721	451665		471700		573030	668591	274368	622026		509690	726903	222226		287890	37529.7	165091	65103.8	109822	87373.3	107625	165698		128459		72428.1	113681	250574	334149
NTAYLQMNSLK		5.45573e-10	0.000276662	1	1	16	A0A0B4J1V6	A0A0B4J1V6 [98-108]		0	1282.65	2.02614e+06	514391	904113		1.8631e+06	796518	935992	851775	797054	1.35869e+06			817437	664290	864854	1.21713e+06	2.40204e+06	1.00564e+06	1.29449e+06	1.0067e+06	445779	142911	572797		556082	103029	368911	270142	274310	498447			137999	83962.8	147052	1.11158e+06	1.29036e+06	455704
NTASLKYENYELTLK		9.74903e-07	0.000276662	1	1	3	P04114	P04114 [1557-1571]		1	1786.92		489873	981609				455111	825043	1.01626e+06	761043		752764			284092	1.36186e+06	530506		518885	290645		136099	621895				179377	261664	349751	279196		205002			48304.4	1.24375e+06	284985
NSVASISTCDGLR	1xCarbamidomethyl [C9]	5.07153e-09	0.000276662	1	1	4	O15204	O15204 [135-147]		0	1379.66	249750	253703					197846			437246				188946					119655	348451	54948.6	70485.3					77978.8			160408				23881.8
NSLYLQMNSLR	1xOxidation [M7]	9.02158e-06	0.000276662	5	9	34	P0DP04; A0A0B4J1X8; P01780; P01766; A0A0C4DH32	P0DP04 [96-106]; A0A0B4J1X8 [96-106]; P01780 [96-106]; P01766 [95-105]; A0A0C4DH32 [96-106]		0	1354.68	1.13796e+07	7.44367e+06	9.61088e+06	1.027e+07	1.71995e+07	1.02473e+07	7.93049e+06	1.12103e+07	8.51109e+06	1.07424e+07	5.93906e+07	1.24129e+07	5.14577e+06	6.32211e+06	1.31387e+07	7.05772e+06	9.25792e+06	5.13607e+06	1.26587e+07	2.12658e+07	2.50367e+06	2.06804e+06	6.08893e+06	1.19991e+06	5.13355e+06	1.32548e+06	3.12572e+06	3.55536e+06	2.92914e+06	3.94093e+06	2.24861e+06	3.38043e+06	868704	799082	2.23399e+06	6.44563e+06	4.9733e+06	2.3274e+06
NSLYLQMNSLR		2.34158e-09	0.000276662	5	9	34	P0DP04; A0A0B4J1X8; P01780; P01766; A0A0C4DH32	P0DP04 [96-106]; A0A0B4J1X8 [96-106]; P01780 [96-106]; P01766 [95-105]; A0A0C4DH32 [96-106]		0	1338.68	1.12055e+07	9.74877e+06	1.47068e+07	1.29636e+07	3.08215e+07	7.75684e+06	1.11817e+07	2.63195e+07	1.2188e+07	2.7246e+07		2.50906e+07		4.151e+06	1.71857e+07	2.06392e+07	2.04372e+07	9.41598e+06	4.2024e+07	3.10821e+07	2.46536e+06	2.70846e+06	9317434	1.51463e+06	9.19933e+06	1.00334e+06	4.40714e+06	8.3473e+06	4194565	9.99545e+06		6.83299e+06		524665	2.9221e+06	1.88493e+07	1.09787e+07	4266827
NTCNHDEDTWVECEDPFDLR	2xCarbamidomethyl [C3; C13]	1.21982e-23	0.000276662	1	1	28	O43866	O43866 [226-245]		0	2552.01	384948	1.0168e+06	3.962e+06	574404	8.49802e+06	2.31322e+06	1.52035e+06	3.03908e+06	663900	2.52003e+06		2.53265e+06			808740	3.83877e+06	2.34928e+06	1.34259e+06	4.1408e+06	322433	84694	282494	2.51011e+06	67111.5	2.53641e+06	299214	599232	963852	228485	924497		689723			137511	3.50585e+06	1.26202e+06	608393
NSLYLQMNSLK		3.69952e-05	0.000276662	1	1	15	A0A0B4J1Y9	A0A0B4J1Y9 [98-108]		0	1310.68	1.63786e+06	792244	667329	1.1042e+06	3.27676e+06	576052	701516	1.36345e+06	1.86123e+06	2.54837e+06		3.42913e+06		2.00511e+06	748055	3.28379e+06	2.49608e+06	726353	3.1309e+06	1.03185e+06	360353	220106	422784	129011	978018	74512.1	276495	432423	640552	934894		933864		253435	127192	2.999e+06	1.34088e+06	329145
NTLIIYLDK		0.000297578	0.000276662	1	1	23	P01024	P01024 [1442-1450]		0	1092.63	1.16907e+06	1.64995e+06	2.70868e+06	6.77642e+06	1.72157e+06	1.83265e+06	3.82691e+06	3.46014e+06	2.79435e+06	2.54696e+06		3.50809e+06	613585	1.18998e+06	3.21322e+06	3.10291e+06	1.28524e+06	1.6921e+06	2.66306e+06	2.08241e+06	257212	458398	1.71608e+06	791735	513840	237053	1.50834e+06	1097391	961691	934378		955366	103585	150407	546348	2.83381e+06	690426	766771
NTLYLQMGSLR	1xOxidation [M7]	0.000420386	0.000276662	1	1	7	A0A075B6Q5	A0A075B6Q5 [97-107]		0	1311.67	796986	225892	578789	401909	223904	533319	723061	281978	499090	602713		1.27304e+06		528998	981852	538413	457736		817777	334584	175348	62758.6	366689	46957.8	66828.9	68984.5	284987	89430	171765	221111		346690		66862.6	166945	491719	245893
NVQDAIADAEQR		6.48424e-16	0.000276662	1	1	34	P35908	P35908 [419-430]		0	1329.64	2.34252e+07	1.54489e+07	1.20746e+07	1.82131e+08	1.38184e+07	4.00713e+07	1.92301e+07	1.3252e+07	2.02048e+07	7.86106e+06	2.24654e+06	6.32023e+06	6.26578e+07	7.16918e+07	1.96961e+07	3.73574e+06	8.67539e+06	7.1894e+06	6344042	1.37965e+07	5153861	4.2921e+06	7.64981e+06	2.12796e+07	4.12438e+06	5.1832e+06	7.57932e+06	4.2029e+06	6.95361e+06	2.8839e+06	85057.3	1.7212e+06	1.05778e+07	9.06147e+06	3.34895e+06	3.41175e+06	4.66037e+06	3.25786e+06
NVPLPVIAELPPKVSVFVPPR		3.49063e-36	0.000276662	1	1	6	P01871	P01871 [100-120]		1	2268.35			349876		1.43226e+06		386256	984062		1.44066e+06						1.21524e+06			808639				221663		427488		152239	312097		528521						1.10985e+06
NVPLPVIAELPPK		8.44154e-13	0.000276662	1	1	91	P01871	P01871 [100-112]		0	1386.84	4.99247e+08	7.15058e+08	6.47862e+08	5.26991e+08	1.11706e+09	3.6425e+08	2.62403e+08	5.6177e+08	4.23226e+08	6.95634e+08	1.01077e+06	1.40913e+09	3.36086e+08	2.48574e+08	7.15689e+08	3.51883e+08	4.8671e+08	3.8491e+08	4.78666e+08	5.82362e+08	1.09841e+08	1.98662e+08	4.10451e+08	6.15719e+07	3.33409e+08	4.71155e+07	1.03423e+08	1.78167e+08	1.45655e+08	2.552e+08	38269.1	383751320	5.67378e+07	3.14185e+07	1.21689e+08	321365676	2.61458e+08	174420720
NVMSAFGLTDDQVSGPPSAPAEDR	1xOxidation [M3]	2.80237e-06	0.000276662	1	1	6	Q92734	Q92734 [180-203]		0	2477.12		157551	116699	457383		266325	177758	489343	179306	474075		235196		190685	510756	275727	243042		191016			43771.6	73934	53439.1		34449	70061.6	155196	61709.3	173919		64051.5		24101.7	86844.4	251814	130561
NVMSAFGLTDDQVSGPPSAPAEDR		1.51506e-08	0.000276662	1	1	2	Q92734	Q92734 [180-203]		0	2461.13			103897									229499				237044	140711		252161				65823.7									62500.1				216486	75589.2
NVGSQTLQTFK		1.40511e-06	0.000276662	1	1	8	P08514	P08514 [109-119]		0	1222.64	1.20861e+06	3.68575e+06	2.21736e+06	396567	1.40217e+06	1.00756e+06	3.12104e+06	4.59893e+06	2.1588e+06	1.64625e+06		5.31778e+06	1.3063e+07	1.32933e+07	4.64564e+06	2.73935e+06	3.20836e+06		2.39091e+06	5.97098e+06	265910	1.024e+06	1.4048e+06	46333.6	418508	130328	1.23013e+06	1.45856e+06	742962	603943		1.4482e+06	2.20529e+06	1.6802e+06	789902	2501779	1.72352e+06
NTLYLQMGSLR		5.67266e-07	0.000276662	1	1	9	A0A075B6Q5	A0A075B6Q5 [97-107]		0	1295.68	968729	509102	2.29237e+06	333927	573602	548070	1.40045e+06	817155	1.31428e+06	1.19306e+06		1.9915e+06	452963	180990	754960	1.46486e+06	968223	727522	2.07986e+06	691941	213134	141442	1.45232e+06	39015	171204	70892.5	551973	259163	452318	437687		542351	76468.8	22876.2	128367	1.33782e+06	520124	329675
NVELQCLDADDAK	1xCarbamidomethyl [C6]	1.26281e-08	0.000276662	1	1	3	P02730	P02730 [880-892]		0	1490.68							262808	521106	379842	233351		153477			136612	284935	457061		381732	218969							103583	165270	130725	85607.1		41796.8			23228.2	260224	245530
NTMILEICTR	1xCarbamidomethyl [C8]; 1xOxidation [M3]	0.00192659	0.000276662	1	1	2	P01024	P01024 [1382-1391]		0	1266.62	1.09644e+06	818624	257113	1.5291e+06	546927		559188	367749				2.00542e+06			1.33906e+06		825480			446782	241233	227435	162893	178655	163242		220398	116632				546140			227681		443443
NTLYLQMSSLR	1xOxidation [M7]	0.000308901	0.000276662	1	1	12	A0A0J9YX35	A0A0J9YX35 [96-106]		0	1341.68	1.43692e+06	1.46649e+06	2.06709e+06	1.12259e+06	2.37158e+06	1.06058e+06	1.69391e+06	1.55117e+06	1.66713e+06	1.98495e+06		1.07751e+06	1.56845e+06	1.34669e+06	1.77022e+06	1.49945e+06	1.23189e+06	192849	935714	1.23173e+06	316143	407429	1.30959e+06	131160	707849	137186	667636	491956	573753	728198		293441	264784	170214	300993	1.36941e+06	661765	87388.9
NTLYLQMSSLR		1.62058e-07	0.000276662	1	1	13	A0A0J9YX35	A0A0J9YX35 [96-106]		0	1325.69	346960	840627	2.63401e+06	1.39706e+06	3.7988e+06	1.15814e+06	1.46965e+06	2.19036e+06	1.86751e+06	2.06209e+06		3.02873e+06	745397	384277	1.60501e+06	2.28497e+06	753132	770035	1.70519e+06	673942	76336.1	233548	1.66877e+06	163228	1133832	149804	579248	694679	642715	756496		824822	125837	48570.6	272901	2086806	404578	348939
NTLYLQMNSLR	1xOxidation [M7]	6.01777e-10	0.000276662	1	7	22	P0DP03	P0DP03 [96-106]		0	1368.69	6.50749e+06	4.004e+06	1.34393e+07	7.90244e+06	1.83191e+07	9.40196e+06	1.11541e+07	1.20815e+07	1.49847e+07	1.60365e+07		1.26679e+07	1.31462e+07	8.00332e+06	1.42378e+07	1.38942e+07	1.58043e+07	1.03132e+07	2.09133e+07	1.69254e+07	1.43174e+06	1.11242e+06	8.51439e+06	923295	5.46773e+06	1.21614e+06	4396281	3.83169e+06	5.15707e+06	5.88315e+06		3.44988e+06	2.21932e+06	1.01158e+06	2.42086e+06	1.26892e+07	8.48997e+06	4673401
NTLYLQMNSLR		2.58281e-09	0.000276662	1	7	22	P0DP03	P0DP03 [96-106]		0	1352.7	7.89558e+06	8.03011e+06	1.39979e+07	9.41796e+06	2.9988e+07	7.30988e+06	1.3566e+07	2.06322e+07	1.50074e+07	1.8169e+07		2.24868e+07	6.52629e+06	4.97029e+06	1.44994e+07	2.47168e+07	1.68435e+07	1.10866e+07	3.67277e+07	1.46794e+07	1.73714e+06	2.23097e+06	8.8683e+06	1.10036e+06	8.95056e+06	945529	5.3469e+06	6.54357e+06	5.16489e+06	6.66546e+06		6.1239e+06	1.10176e+06	628219	2.46535e+06	2.25733e+07	9.04825e+06	5023860
NTLYLQMNSLK		6.9318e-07	0.000276662	1	1	18	A0A0B4J1V0	A0A0B4J1V0 [98-108]		0	1324.69	1.29092e+06	1.23791e+06	1.44925e+06	2.27559e+06	4.17119e+06	1.95615e+06	2.72529e+06	5.63964e+06	2.65579e+06	3.05074e+06		3.08e+06	95137.2	712769	2.3443e+06	3.05499e+06	2.12657e+06	1.1534e+06	3.81661e+06	4.09214e+06	284021	343923	918169	265873	1.24498e+06	253027	1.07414e+06	1.78862e+06	914006	1.11919e+06		838783	16061	90090.3	398603	2.79005e+06	1.14238e+06	522660
NVALVSGDTENAK		1.08622e-12	0.000276662	1	1	13	Q16610	Q16610 [506-518]		0	1317.66	1.95249e+06	4.28569e+06	2.18859e+06	2.51461e+06	1.84985e+06	2.54403e+06	2.6308e+06	1.80188e+06	2.6788e+06	2.00854e+06		1.7094e+06	2.07875e+06	2.22417e+06	1.92984e+06	2.44236e+06	2.09612e+06	1.34802e+06	1.14247e+06	3.28944e+06	429576	1.19068e+06	1.38657e+06	293799	552127	329069	1.0369e+06	571469	921923	736853		465526	350933	281124	328132	2.23055e+06	1.12603e+06	610851
NVTELNEPLSNEER		1.49097e-11	0.000276662	1	1	6	P61981	P61981 [29-42]		0	1643.79	161359	209798							364621			588972		520459	310271	262814				383408	35501.3	58287.2							125486			160396		65783.4	52755.7	240021
NSLKIEIPLPFGGK		0.000508531	0.000276662	1	1	2	P04114	P04114 [1292-1305]		1	1512.88		57276.1	459103				133277		238851			439251				703262			193392			15912.8	290863				52529.8		82201.8			119622				642271
NSLFEYQK		0.000981856	0.000276662	1	1	11	P02671	P02671 [90-97]		0	1028.5	1.0425e+07	5.25262e+06	4.57582e+06	1.25053e+07	1.60658e+07	1.51142e+07	5.64008e+06	1.21712e+07	4.10989e+06	5.01344e+06		3.05086e+07		6.89393e+06	2.84511e+07	6.18101e+07	1.33912e+07	111522	46018064	2.50091e+07	2293643	1.45931e+06	2.89899e+06	1.46108e+06	4.79519e+06	1.95501e+06	2.22298e+06	3860111	1.41444e+06	1.83923e+06		8308476		871357	4837569	56449612	7.1937e+06	50535.7
NPSGHCLVDLPGLEGCYPK	2xCarbamidomethyl [C6; C16]	6.09915e-06	0.000276662	1	1	1	Q9HC84	Q9HC84 [1181-1199]		0	2112.98			210736													123913							133511													113167
NPQELYDVYCFAR	1xCarbamidomethyl [C10]	0.000443103	0.000276662	1	1	1	O14594	O14594 [244-256]		0	1674.76
NPNLPPETVDSLK		1.43741e-12	0.000276662	1	1	56	P05090	P05090 [152-164]		0	1423.74	9.12215e+06	5.60324e+07	9.40027e+06	1.3551e+06	2.83832e+06	4.17309e+06	2.51392e+07	3.0014e+07	1.56509e+07	1.52407e+07		2.67596e+07	3.36127e+06	4.28518e+06	3.99258e+06	1.19313e+07	2.91799e+07	5.16024e+06	1.18734e+07	1.73245e+07	2.007e+06	1.55672e+07	5.9555e+06	158325	847157	539787	9.90834e+06	9.51902e+06	5.38635e+06	5.59119e+06		7.2875e+06	567447	541625	678862	1.08966e+07	1.56753e+07	2.33835e+06
NPNGYSFSIPVK		2.19009e-06	0.000276662	1	1	10	P04114	P04114 [3713-3724]		0	1322.67	1.7264e+07	1.0757e+07	2.93158e+07	1.32174e+06	4.69867e+06	1.26025e+06	6.79523e+06	9.44109e+06	1.71616e+07	7.3198e+06		9.78831e+06	2.93241e+07	1.74896e+07	3.64572e+06	1.98626e+07	1.18346e+07		1.67358e+07	7.28731e+06	3.79833e+06	2.98858e+06	1.85729e+07	154428	1.40242e+06	163012	2678270	2.99426e+06	5.90626e+06	2.68534e+06		2.66567e+06	4950473	2.21059e+06	619886	1.814e+07	6.35746e+06
NPLVWVHASPEHVVVTR		9.89407e-19	0.000276662	1	1	3	Q14624	Q14624 [789-805]		0	1940.05								185835		148388						1.15416e+06	348643		531791									58938.1		54437.7						1.05407e+06	187289
NPEENEAIASFVK		2.13061e-06	0.000276662	1	2	1	Q8IWL2	Q8IWL2 [167-179]		0	1447.71		785627	265305	1.67101e+06			527555					165513					456202			619417		218268	168083	195235			207930					45074.4					245069
NPSSAGSWNSGSSGPGSTGNR		2.91479e-07	0.000276662	1	1	1	P02671	P02671 [288-308]		0	1963.85				276419	322281	255528		90738							159164	511621	214930		135050	129847				32295.9	96191.7	33052.4		28777.8							27062.8	467251	115459
NPDPVAAPYCYTR	1xCarbamidomethyl [C10]	4.45618e-14	0.000276662	1	1	9	P08519	P08519 [3385-3397]		0	1523.69		2.5119e+06	6.66393e+07	1.87896e+07			2.18401e+06		1.76028e+06				236694	1.00747e+07	5.20869e+06	1.14667e+07	1.85475e+07	6.27514e+06	1.76736e+07			697871	4.22191e+07	2.19531e+06			860803		605811				39958.4	1.27339e+06	885638	10472208	9963596	2.84356e+06
NPDAVAAPYCYTR	1xCarbamidomethyl [C10]	1.41634e-17	0.000276662	1	1	53	P08519	P08519 [79-91]; [193-205]; [307-319]; [421-433]; [535-547]; [649-661]; [763-775]; [877-889]; [991-1003]; [1105-1117]; [1219-1231]; [1333-1345]; [1447-1459]; [1561-1573]; [1675-1687]; [1789-1801]; [1903-1915]; [2017-2029]; [2131-2143]; [2245-2257]; [2359-2371]; [2473-2485]; [2587-2599]; [2701-2713]; [2815-2827]; [2929-2941]; [3043-3055]; [3157-3169]; [3271-3283]		0	1497.68	2.84368e+08	4.4701e+08	7.82021e+08	7.19547e+07	2.73057e+08	2.26177e+08	5.89846e+08	4.77956e+08	3.28513e+08	1.72097e+08		6.45725e+08	1.23931e+09	9.68241e+08	3.77153e+08	1.85736e+08	3.76651e+08	1.9673e+08	2.169e+08	9.89475e+07	6.25649e+07	1.24191e+08	495446109	8.40696e+06	8.14996e+07	2.92559e+07	2.32482e+08	1.51585e+08	1.1306e+08	6.31354e+07		1.75852e+08	2.09219e+08	1.22381e+08	6.41276e+07	1.69628e+08	2.02335e+08	8.91476e+07
NPCTDGTHDCNK	2xCarbamidomethyl [C3; C10]	2.95941e-16	0.000276662	1	1	20	P07996	P07996 [648-659]		0	1418.54	3.69388e+06	1.28573e+07	4.34553e+06	1.56868e+06	1.04408e+07	4.49114e+06	1.49741e+07	2.84003e+06	6.19499e+06	6.74757e+06	2.01885e+07	1.21534e+07	1.46409e+07	1.63925e+07	1.13095e+07	6.23592e+06	5.82001e+06	1.97411e+06	8.69287e+06	9.6286e+06	812704	3.57209e+06	2.75309e+06	183279	3.11629e+06	580926	5.90189e+06	900722	2.13204e+06	2.47541e+06	764363	3.30976e+06	2.47167e+06	2.07192e+06	1.92296e+06	5.6951e+06	3.12648e+06	894561
NNVEQVCCSFECQPAR	3xCarbamidomethyl [C7; C8; C12]	1.01512e-15	0.000276662	1	1	17	P12109	P12109 [241-256]		0	1997.83	1.23698e+06	894392	731423	479060	1.01184e+06	1.40953e+06	1.09019e+06	1.16615e+06	843593	381820		1.12402e+06	1.07052e+06	545234	440943	168182	565266	1.04407e+06	451523	764219	272154	248485	463390	55971.8	302006	182322	429685	369846	290327	140074		306107	180724	68914.8	74974	153596	303658	473116
NNPAIVIIGNNGQIHYDHQNDGASQALASCQR	1xCarbamidomethyl [C30]	7.99352e-07	0.000276662	1	1	1	P49257	P49257 [161-192]		0	3475.65
NNNRPSGISER		4.56706e-05	0.000276662	1	1	5	A0A075B6I4	A0A075B6I4 [71-81]		0	1243.61	5.73693e+06		1.67535e+06	4.32429e+06	9.67442e+06	1.9098e+06	252223	3.03801e+06	2.37951e+06	3.39885e+06		1.8995e+07		3.00715e+06	5.29774e+06	1.97472e+06	8.15972e+06		3.69953e+06	9.74924e+06	1.2622e+06		1.06141e+06	505236	2.88754e+06	247032	99410.9	963513	818920	1.2469e+06		5.17295e+06		380088	900780	1803458	4383354
NNIFMSNSYPR	1xOxidation [M5]	3.15942e-10	0.000276662	1	1	5	P05164	P05164 [715-725]		0	1358.62								3.54319e+06				1.28037e+06				157836	433763	215990	961124									1.12373e+06				348687				144147	233015	97875.2
NPDPVAAPWCYTTDPSVR	1xCarbamidomethyl [C10]	4.36035e-10	0.000276662	1	1	11	P08519	P08519 [3499-3516]		0	2045.94	756621	2.30967e+06	7.65241e+06		1.14677e+06	875480	1.61873e+06	2.60062e+06	1.40988e+06	1.00553e+06		3.95816e+06	3.89576e+06	2.06169e+06	873564	1.8055e+06	2.49603e+06	206956	2.60057e+06	413968	166467	641686	4.84815e+06		342278	113243	638006	824793	485218	368886		1.07793e+06	657678	260587	148533	1.64891e+06	1.34086e+06	93781.4
NSLFFSAQPFEITASTNNEGNLK		3.85886e-21	0.000276662	1	1	4	P04114	P04114 [3035-3057]		0	2529.23
NQADCIPFFR	1xCarbamidomethyl [C5]	3.51499e-09	0.000276662	1	1	4	P05164	P05164 [305-314]		0	1267.59	52993				142541			6.24014e+06	279131			3.18656e+06			74265.5	407527	1.08958e+06	601376	1.76934e+06	161563	11659.2				42544.5			1.97907e+06	96064.4			867803			12627.4	372184	585316	272512
NQFSLQLNSVTPEDTAVYYCAR	1xCarbamidomethyl [C20]	4.38058e-16	0.000276662	1	1	4	A0A0B4J1U7	A0A0B4J1U7 [100-121]		0	2576.21	109620	48839.2	1.36015e+06				205309	659336		621168	2.81864e+06	411642			646747	1.19855e+06			395442		24117.9	13568.8	861720				80920.3	209110		227881	106718	112104			109967	1.09461e+06
NSLESYAFNMK		8.00469e-09	0.000276662	1	1	3	P11142	P11142 [540-550]		0	1303.6			88849					767983			255510				458084				380771	277018			56289.9					243568			9673.98				77888.4
NSLDCEIVSAK	1xCarbamidomethyl [C5]	1.16502e-12	0.000276662	1	1	16	Q01518	Q01518 [423-433]		0	1235.59	2.15038e+06	1.01378e+06	2.48579e+06		383421	1.04287e+06	1.9199e+06	4.91034e+06	1.44304e+06	816189		2.73372e+06	3.92061e+06	3.44671e+06	1.83448e+06	986755	2.55666e+06	464930	613891	4.14973e+06	473113	281653	1.57486e+06		114440	134895	756708	1.55732e+06	496629	299427		744482	661874	435646	311919	901178	1.37342e+06	210682
NSGLTEEEAK		5.00015e-12	0.000276662	1	1	10	P13671	P13671 [388-397]		0	1077.51	401359	848844	464825	721280	1.61339e+06	832633	1.10927e+06	1.25458e+06	580947	1.3049e+06	3.23526e+06	1.83404e+06	613243	855976	1.3454e+06	1.3983e+06	976858	1.49059e+06	6.25187e+06	1.20132e+06	88304.6	235831	294488	84272.1	481550	107701	437207	397893	199936	478716	122491	499468	103527	108191	228760	1277030	524763	675457
NSFEDPCSLSVENENYAR	1xCarbamidomethyl [C7]	2.87091e-13	0.000276662	1	1	2	Q9HC84	Q9HC84 [602-619]		0	2130.9			621968													448432							394045													409541
NSEEFAAAMSR	1xOxidation [M9]	1.63053e-12	0.000276662	1	1	49	P04114	P04114 [118-128]		0	1228.53	2.13081e+07	2.59683e+07	4.45423e+07	4.12632e+06	8.31836e+06	4.62459e+06	4.34902e+07	2.18906e+07	3.30269e+07	2.35716e+07	48497.5	2.45868e+07	3.88861e+06	2.28576e+07	2.91558e+07	7.3883e+07	4.01761e+07	1.00545e+07	4.36365e+07	1.6636e+07	4.68808e+06	7.21467e+06	2.82196e+07	482106	2.48279e+06	598188	1.71412e+07	6.94265e+06	1.13664e+07	8.64747e+06	1836.18	6.69577e+06	656471	2.88909e+06	4.9574e+06	6.74755e+07	2.15824e+07	4.55619e+06
NSEEFAAAMSR		1.98378e-12	0.000276662	1	1	38	P04114	P04114 [118-128]		0	1212.53	1.82341e+07	2.83083e+07	6.68594e+07	2.78318e+06	1.09428e+07	1.59486e+06	4.06725e+07	2.78274e+07	3.41756e+07	2.17718e+07		4.61721e+07	3.78098e+07	1.33026e+07	1.67585e+07	9.46733e+07	4.14327e+07	1.14564e+07	5.83688e+07	1.21045e+07	4.01175e+06	7.86479e+06	4.23585e+07	325178	3.26612e+06	206294	1.60306e+07	8.82551e+06	11761711	7.9872e+06		1.25742e+07	6.38301e+06	1.68138e+06	2.84946e+06	8.64627e+07	2.22574e+07	5191441
NQCTQVVQER	1xCarbamidomethyl [C3]	4.10053e-09	0.000276662	1	1	11	P15924	P15924 [1803-1812]		0	1261.6	888697	521527	310906	442565	757012	1.56657e+06	752297	167734	470583	160275		83847.6	2.41454e+06	1.2832e+06	344525		529750	726417		590190	195526	144894	196973	51707.9	225947	202635	296510	53197.1	161954	58798.5		22834.4	407620	162190	58580		284579	329174
NSDKDIFGDACDNCLSVLNNDQK	2xCarbamidomethyl [C11; C14]	3.58097e-15	0.000276662	1	1	1	P35443	P35443 [533-555]		1	2642.15												354799							348082													96623.2
NQVVLTMTNMDPVDTATYYCAR	1xCarbamidomethyl [C20]; 1xOxidation [M]	1.83383e-13	0.000276662	1	2	2	P01814	P01814 [97-118]		0	2579.16				183872						145589									236545	174153				21483						53410.5
NQVVLTMTNMDPVDTATYYCAHR	1xCarbamidomethyl [C20]; 1xOxidation [M]	8.00669e-11	0.000276662	1	1	9	P01817	P01817 [97-119]		0	2716.22		300337	141573				220116	614734		289953		499677			875068	840818	111153	253520		149687		83441.5	89692.8				86756.4	194964		106372		136078			148789	767897	59710.8	114882
NQVVLTMTNMDPVDTATYYCAHR	1xCarbamidomethyl [C20]	2.24859e-17	0.000276662	1	1	6	P01817	P01817 [97-119]		0	2700.22			399053					649819		253299		283177		218232	616495	1.93276e+06			754403	61738.3			252818					206092		92925.2		77118.2		27583.4	104823	1765138
NQVSLTCLVK	1xCarbamidomethyl [C7]	3.12451e-06	0.000276662	4	4	81	P01857; P01861; P01859; P01860	P01857 [244-253]; P01861 [241-250]; P01859 [240-249]; P01860 [291-300]		0	1161.63	1.21007e+08	2.10588e+08	3.23903e+08	5.15014e+08	4.65591e+08	9.91037e+08	4.60176e+08	5.46724e+08	6.88593e+08	5.90059e+08		5.26656e+08	1.57611e+08	8.13144e+07	2.00871e+08	6.69174e+07	4.1135e+08	5.6812e+08	2.92933e+08	9.47206e+08	2.66231e+07	5.85068e+07	2.05207e+08	6.01725e+07	138965600	1.2819e+08	1.81374e+08	1.73395e+08	2.36983e+08	2.16469e+08		1.43425e+08	26607820	10277723	3.41542e+07	61113936	2.20975e+08	2.57442e+08
NQTLQNEILGHTPR		0.0012899	0.000276662	1	1	3	P11277	P11277 [1520-1533]		0	1620.85		283691					716470					386499					524822		118915	423587		78816.8					282389					105256					281932
NQTAEKEEFEHQQK		3.53947e-18	0.000276662	1	1	6	P11142	P11142 [584-597]		1	1745.81	1.10368e+06	1.39793e+06	1.13031e+06	1.08023e+06	1.09577e+06	1.71511e+06	1.65147e+06	5.57134e+06	1.68556e+06	1.37547e+06		3.22094e+06	422720	3.66437e+06	4.49671e+06	2.43219e+06	2.2046e+06	690247	6.59882e+06	4.6193e+06	242825	388382	716103	126210	327056	221849	650910	1.76696e+06	580095	504605		877165	71363.2	463158	764579	2.22126e+06	1.1843e+06	312784
NRPPLEEDDEEGE		8.22406e-07	0.000276662	1	1	2	P08514	P08514 [1027-1039]		0	1528.64	210643	468634	379347		436540		387719	934520		244110		2.00575e+06	147129	2.09425e+06		671824	429989	54725.4	444134	1.00662e+06	46344.4	130199	240334		130295		152816	296385		89554.1		546231	24838.2	264702		613559	230988	24798.7
NNLELSTPLK		1.03907e-07	0.000276662	1	1	35	P07225	P07225 [582-591]		0	1128.63	1.84294e+07	2.16896e+07	2.27216e+07	1.56738e+07	1.97405e+07	1.81683e+07	1.34222e+07	2.29045e+07	1.7023e+07	1.88171e+07		1.82664e+07	2.1559e+07	1.44597e+07	2.82898e+07	1.77582e+07	1.4453e+07	9.37106e+06	1.64636e+07	9.12852e+06	4.05472e+06	6.02593e+06	14395169	1.83128e+06	5.89198e+06	2.35006e+06	5.29022e+06	7.26423e+06	5.85856e+06	6.90324e+06		4.97454e+06	3.63958e+06	1.82763e+06	4.81014e+06	16218113	7.76409e+06	4.24647e+06
NVVALDTEVASNR		5.92915e-15	0.000276662	1	1	12	P01130	P01130 [428-440]		0	1387.72	344107	613592	450532				435899	518603	907385	354895		236006			168569	225537	742359	157665	389956	399806	75708.4	170472	285433				171805	164476	312282	130197		64272.1			28662	205977	398791	71445.6
NYLAWYQQKPGQPPK		3.57262e-12	0.000276662	1	1	19	P06312	P06312 [57-71]		0	1817.93	1.70276e+07	1.63521e+07	1.50014e+07	8.38458e+06	1.82393e+07	6.2062e+06	1.41357e+07	1.52882e+07	1.24676e+07	1.47583e+07		9.68111e+06	8.00611e+06		9.74883e+06	1.24246e+07	2.43435e+07	9.35572e+06	40521976	1.00683e+07	3.74631e+06	4543024	9504094	979627	5443921	802769	5.57143e+06	4.84869e+06	4290801	5414228		2.63648e+06	1.35159e+06		1.6576e+06	11347062	1.30772e+07	4239517
QGLLPVLESFK		5.64122e-11	0.000276662	1	1	19	P02647	P02647 [240-250]		0	1230.71	3.59506e+07	2.08497e+08	2.48637e+08	1.4172e+07	5.00113e+07	2.65019e+07	1.86782e+08	1.2954e+08	1.95027e+08	1.29515e+08				2.60621e+07	7.10699e+07	1.66866e+08	2.81395e+08	5.08506e+07	106807416	2.67351e+07	7909643	5.79258e+07	1.57523e+08	1.65582e+06	14926949	3428010	7.36181e+07	41083824	67119696	47513848				3.29412e+06	12084087	152394688	1.51164e+08	23042824
QGFGNVATNTDGK		1.97613e-19	0.000276662	1	1	27	P02675	P02675 [301-313]		0	1308.62	1.74604e+07	9.74508e+06	7.20537e+06	2.86085e+07	3.79679e+07	3.19376e+07	1.06475e+07	1.69044e+07	7.30977e+06	8.98517e+06		3.32423e+07		9.87737e+06	5.09625e+07	9.27244e+07	1.80184e+07	1.01159e+09	65967570	3.24366e+07	3.84152e+06	2.70744e+06	4.56493e+06	3.34253e+06	1.13323e+07	4.13111e+06	4.19659e+06	5.36125e+06	2.5157e+06	3.2963e+06		9.05295e+06		1.24845e+06	8.6652e+06	8.46828e+07	9.67938e+06	4.58401e+08
QGFFPDSVNK		4.25903e-05	0.000276662	1	1	18	P04114	P04114 [708-717]		0	1138.55	1.46208e+08	1.31566e+08	2.60967e+08	1.2162e+07	3.93335e+07	1.44624e+07	1.30948e+08	6.4181e+07	1.61954e+08	7.89383e+07		7.58702e+07	1.36444e+08	1.47388e+08	7.13424e+07	2.45733e+08	1.58211e+08	2.51229e+07	1.94259e+08	5.34759e+07	3.21678e+07	3.65524e+07	1.65335e+08	1.42097e+06	11739917	1.8707e+06	51611924	20355146	5.57374e+07	28959242		2.06619e+07	23034414	1.86291e+07	1.21304e+07	2.24421e+08	8.49903e+07	11384371
QGEQIEIIR		3.36507e-05	0.000276662	1	1	1	O15117	O15117 [533-541]		0	1085.59													1.32661e+06																				223957
QFYDQALQQAVVDDDANNAK		2.23996e-24	0.000276662	1	1	9	P60033	P60033 [125-144]		0	2253.04	1.09552e+06	394703	1.19459e+06		1.45321e+06	345092	311540	1.06239e+06	1.21331e+06	1.27888e+06		1.13432e+06		386648		1.26136e+06	334555	698561	638256	1.75391e+06	241030	109659	756828		433740	44637.4	122790	336941	417567	469168		308913		48870.3		1.15197e+06	179721	316551
QFTSSTSYNR		1.85543e-10	0.000276662	1	1	14	P02671	P02671 [582-591]		0	1190.54	3.46087e+06	2.44767e+06	1.76682e+06	6.30963e+06	6.55536e+06	6.55577e+06	3.18874e+06	5.2332e+06	2.55732e+06	3.29489e+06		2.64962e+06	2.12625e+06	2.09374e+06	4.44124e+06	1.36627e+07	1.71922e+06	1.27045e+08	4485727	8.68318e+06	761440	680026	1.11936e+06	737196	1.95659e+06	847986	1.25681e+06	1.65972e+06	880115	1.20876e+06		721578	358952	264638	755148	12477788	923554	5.757e+07
QGNLSSSGNQEGSQK		0.00142769	0.000276662	1	1	2	Q5D862	Q5D862 [165-179]		0	1520.69	312684			444682		970608					616933			730464							68794.8			51955.2		125548					23358			92326.9
QFTSSSSMK		0.000835482	0.000276662	2	2	7	P02533; P08779	P02533 [7-15]; P08779 [7-15]		0	1002.46	2.55356e+06	943027	576990	913603	897808	4.84411e+06	1.23383e+06	659590	456015	247414	481839	179514	2.09891e+06	1.51173e+06	1.27267e+06	275954	3.75185e+06	1.39534e+06	311906	1.04896e+06	561819	261997	365550	106742	267970	626583	486302	209191	156940	90766.1	18243.1	48887.4	354335	191075	216393	252021	2.01547e+06	632295
QFSFPLSSEPFQGSYK		4.21703e-09	0.000276662	1	1	3	P01023	P01023 [189-204]		0	1848.88	557066	1.17763e+06	2.51979e+06	290246	2.95169e+06	624173	2.01987e+06	1.50833e+06	3.11547e+06	3.3984e+06		2.13077e+06		661925	3.17163e+06	2.41695e+06	888560		2.21519e+06	324239	122562	327176	1.5964e+06	33911.4	880995	80736.5	796110	478372	1.07221e+06	1246735		580277		83664	539276	2.20734e+06	477330
QEYEQLIAK		5.00959e-05	0.000276662	1	1	19	P35527	P35527 [328-336]		0	1121.58	1.2829e+08	5.60569e+07	2.72922e+07	5.49923e+07	5.2808e+07	2.29004e+08	4.22245e+07	2.78533e+07	4.80393e+07	1.93412e+07		1.16996e+07	8.94653e+07	8.90027e+07	6.00961e+07	1.76086e+07	3.00356e+07		19789296	3.84895e+07	28225616	15574064	17290858	6.42512e+06	15761686	29621602	16642334	8833751	16532995	7.09549e+06		3.18619e+06	15103458	11249486	10218195	16081482	16134981
QEYDESGPSIVHR		1.28104e-14	0.000276662	1	7	13	P60709	P60709 [360-372]		0	1516.7	1.20338e+06	1.98271e+06	1.32108e+06	921629	1.64851e+06	732470	4.2851e+06	980561	927779			4.21967e+06	6.94856e+06	6.94499e+06	2.80991e+06	3.55327e+06	3.33902e+06	480109	1.28752e+06	5.49537e+06	264760	550849	836963	107680	492032	94744.6	1.68893e+06	310987	319300			1.14915e+06	1.17305e+06	877811	477772	3.24511e+06	1.7937e+06	217560
QEPVKPEEGR		0.000610671	0.000276662	1	1	2	P61586	P61586 [136-145]		0	1168.6	173217	256101			390010	110204	142096	350322	270928	177905	801474	165390		144418	240705	157073	167093	73698.1	121563	358256	38110.2	71151.5			116407	14254.8	56005.6	111105	93241.5	65266	30344.9	45041.1		18253.7	40927.2	143451	89761.3	33396.1
QEPSQGTTTYAVTSILR		0.000508531	0.000276662	1	1	1	P01877	P01877 [270-286]		0	1851.94																		842146																				381616
QEPSQGTTTFAVTSILR		0.000210517	0.000276662	1	1	16	P01876	P01876 [283-299]		0	1835.95	7.63428e+06	1.23133e+07	4.32803e+07	1.15011e+07	1.60291e+07	7.11793e+06	4.38957e+06	1.09405e+07	9.37321e+06	1.32495e+07		2.89979e+07	6.2154e+06	4.19925e+06	1.74775e+07	8.71775e+06	5.97194e+06		27160810	1.13935e+07	1.67965e+06	3.42096e+06	2.74201e+07	1.34375e+06	4784237	920700	1.7301e+06	3.46981e+06	3.22584e+06	4.86069e+06		7897064	1.04928e+06	530764	2.97171e+06	7961699	3208091
QFSSSYLSR		0.000705385	0.000276662	1	1	16	P35527	P35527 [5-13]		0	1074.52	4.23697e+07	1.82459e+07	9.66835e+06	3.17042e+07	1.82078e+07	6.25853e+07	1.62497e+07	1.28791e+07	1.7133e+07	8.4352e+06	37234.2	5.59915e+06	2.6489e+07	2.54304e+07	1.30858e+07	3.29333e+06	1.29847e+07	1.14483e+07	5.47023e+06	1.01308e+07	9.32192e+06	5069181	6125345	3704219	5.43452e+06	8.09538e+06	6.40464e+06	4.08463e+06	5896412	3094534	1409.74	1.52483e+06	4.47185e+06	3.21427e+06	2.22499e+06	3.00771e+06	6975289	5.18775e+06
QEMTLTCEKPIK	1xCarbamidomethyl [C7]; 1xOxidation [M3]	8.18967e-10	0.000276662	1	1	8	Q13201	Q13201 [468-479]		0	1493.73	1.86349e+06	4.30234e+06	1.82515e+06	7.09307e+06	2.99631e+06	1.56221e+06	4.63003e+06	556533	2.20668e+06	1.34342e+06		8.26332e+06	1.18179e+07	1.5572e+07	6.92041e+06	2.56433e+06	839668	44074.6	5.27305e+06	6.5066e+06	409994	1.1953e+06	1.15632e+06	828732	894311	202071	1.82488e+06	176506	759443	492846		2.25037e+06	1.99509e+06	1.96822e+06	1.17668e+06	2341939	451065	19972.3
QGPSGASGER		4.6742e-05	0.000276662	1	1	15	P02452	P02452 [985-994]		0	945.438	1.02777e+07	7.95188e+06	5.16497e+06	5.25545e+06	1.10858e+07	1.59592e+07	1.15961e+07	1.0393e+07	1.0215e+07	8.95105e+06	2.06139e+07	6.97536e+06	1.17223e+07	1.28255e+07	1.87233e+06	1.47254e+06	2.87802e+06	1.39525e+07	2.45214e+06	4.73462e+07	2.26124e+06	2.20924e+06	3.27224e+06	614029	3.3088e+06	2064313	4570474	3296176	3.51555e+06	3.28378e+06	780472	1.89962e+06	1.97895e+06	1.62108e+06	318355	1.34483e+06	1.54606e+06	6322528
QGSGSGQSPGHGQR		0.000716552	0.000276662	1	1	4	Q86YZ3	Q86YZ3 [1118-1131]; [1588-1601]; [2058-2071]; [2528-2541]		0	1339.61	1.46153e+07	1.77753e+06	277588	6.13276e+06	55622.1		19420.2	43860.8	728903				1.11329e+06	3.24533e+06							3.21558e+06	493845	175865	716532	16601.6		7654.26	13910.5	250856				187944	410194
QINVGNALEYVSR		3.51499e-09	0.000276662	1	1	4	P12111	P12111 [1309-1321]		0	1462.76	133463	207578	333004		160267	267011	150636	439609	319270	183907		377674				184353	230223		191795	104060	29363.8	57670.5	210974		47835	34537.8	59371.6	139423	109879	67468.2		102853				168365	123675
QLLTLSSELSQAR		6.07098e-08	0.000276662	1	1	5	P15311	P15311 [530-542]		0	1445.8						1.08739e+06		812419	1.09283e+06	187752	730177	281647					138144	254035		359640						140654		257660	376102	68878.6	27645.5	76701.6					74210.3	115115
QLLSLLSAGR		0.0014995	0.000276662	1	1	7	Q76LX8	Q76LX8 [269-278]		0	1057.64		1.7508e+06		287633	2.27396e+06	232547	1.02231e+06	729015	380581	995769		1.6421e+06			178536		1.29569e+06		954720	270565		486418		33606.1	678711	30079.8	402934	231209	130979	365307		447197			30356.7		696036
QLLQENEVQFLDK		1.42516e-13	0.000276662	1	1	2	Q08830	Q08830 [53-65]		0	1603.83																184825			155421																	168796
QLGTVQQVISER		5.08251e-15	0.000276662	1	1	13	P12111	P12111 [1193-1204]		0	1357.74	511027		953056			802248												1.16703e+06			112433		603805			103770												528837
QLGLPGPPDVPDHAAYHPFR		5.71772e-08	0.000276662	1	1	3	Q14624	Q14624 [669-688]		0	2184.1			110866				242823	271013				109705				1.21172e+06	519362		313561				70238.9				95706	85952.5				29876.2				1.10663e+06	278998
QGPVNLLSDPEQGVEVTGQYER		0.000275976	0.000276662	1	1	3	Q14624	Q14624 [754-775]		0	2415.18							104505	278021		135886		465903				504225	49011	188388	156439								41189.5	88175.1		49850.9		126880				460496	26328.4	85367.6
QLGAGSIEECAAK	1xCarbamidomethyl [C10]	1.1705e-18	0.000276662	1	1	11	P00747	P00747 [40-52]		0	1333.64	608508	1.30723e+06	805249	672128	899286	1.65471e+06	1.83994e+06	1.75272e+06	1.04337e+06	1.49104e+06		1.68249e+06		528660	655709	760622	1.87305e+06	1.62579e+06	1.75e+06	2.08955e+06	133880	363183	510162	78529.3	268411	214036	725193	555878	359081	547003		458196		66820	111491	694656	1.00619e+06	736723
QLEEAEEEAQR		0.000113779	0.000276662	1	1	4	P35579	P35579 [1878-1888]		0	1331.61	80180.6	462164	119570		105725	277756	131583	335714	104576	22585.7		399067		318872	556113	121831	101995	327604	384972	258463	17640.8	128401	75753		31555.9	35927.6	51862.1	106472	35990.5	8285.77		108679		40303.8	94556.5	111265	54791	148453
QKVDSLLENLEK		2.3067e-07	0.000276662	1	4	1	P07910	P07910 [205-216]		1	1415.77
QKPDGVFQEDAPVIHQEMIGGLR	1xOxidation [M18]	5.54113e-18	0.000276662	1	1	10	P01024	P01024 [1112-1134]		0	2580.29	365753	695285	3.31144e+06	624657	2.15139e+06	907736	2.97186e+06	7.77126e+06	4.12774e+06	6.21951e+06		5.15259e+06		764352	3.78868e+06	1.14746e+07	4.44666e+06	116099	1.87505e+07	1.92191e+06	80470.7	193168	2.09795e+06	72982.9	642128	117415	1.17133e+06	2.46467e+06	1.42059e+06	2.28168e+06		1.40322e+06		96610.2	644193	1.04794e+07	2.38872e+06	52609.9
QKPDGVFQEDAPVIHQEMIGGLR		2.28031e-17	0.000276662	1	1	9	P01024	P01024 [1112-1134]		0	2564.29			2.05444e+06		1.40088e+06		2.25723e+06	4.45527e+06	1.35903e+06	2.72205e+06		1.84625e+06			677383	1.50482e+07	1.73668e+06	3.92033e+06	24463678				1.30158e+06		418121		889662	1.413e+06	467719	998610		502794			115176	1.37431e+07	932934	1.77649e+06
QGVDADINGLR		1.19812e-12	0.000276662	1	1	22	P35527	P35527 [251-261]		0	1157.59	1.57011e+08	6.16748e+07	4.67549e+07	1.19775e+08	6.11465e+07	2.73888e+08	5.40365e+07	5.00508e+07	7.53777e+07	2.29885e+07		2.14386e+07	6.7586e+07	6.19764e+07	7.03117e+07	2.04444e+07	3.05987e+07	3.11975e+07	2.44128e+07	4.65004e+07	3.45447e+07	1.71348e+07	29621362	1.39941e+07	18250466	3.54272e+07	2.12979e+07	15873721	2.59416e+07	8.43357e+06		5.83843e+06	11409803	7.83351e+06	1.19552e+07	18671314	1.64375e+07	14137064
QGSGSGQSPSR		2.54688e-09	0.000276662	1	1	11	Q86YZ3	Q86YZ3 [652-662]; [1705-1715]; [1822-1832]; [2292-2302]; [2645-2655]		0	1047.48	8.33958e+06	2.64411e+06	445899	2.01145e+06	27391	370395	186910	103812	322710	89750.3	1.13272e+06	512278	1.27997e+06	557944	211548	35657.7	95086.8	47948.4	5834.57	19951.9	1.83482e+06	734602	282497	235011	8175.42	47910.4	73668.5	32924.1	111063	32925.8	42886.4	139510	216083	70521.3	35969.7	32565.2	51080.1	21727.7
QLEQENAELESR		0.000750837	0.000276662	1	1	1	Q14532	Q14532 [116-127]		0	1445.69	427005															99527.3					93947.1															90895.8
NVVYTCNEGYSLIGNPVAR	1xCarbamidomethyl [C6]	1.61292e-10	0.000276662	1	1	3	P10643	P10643 [594-612]		0	2126.03								94332.8		235187		421647			226508	388708		194165	1418966									29917.9		86280.7		114828			38513.3	354997		87985.2
QEMTLTCEKPIK	1xCarbamidomethyl [C7]	2.5035e-11	0.000276662	1	1	12	Q13201	Q13201 [468-479]		0	1477.74	967968	1.95718e+06	463289	750861	1.93254e+06	541984	2.44094e+06	649857	1.03346e+06	1.17548e+06		3.89984e+06	2.72642e+06	2.73231e+06	2.04333e+06	2.04131e+06	506119	1.07241e+06	3.82529e+06	3.25968e+06	212966	543756	293515	87728.2	576808	70105.4	962072	206104	355671	431236		1.06205e+06	460272	345350	347429	1.86428e+06	271884	485961
QEIECQNQEYSLLLSIK	1xCarbamidomethyl [C5]	1.14882e-12	0.000276662	1	1	6	P35527	P35527 [428-444]		0	2095.04	69069.1	153174	1.67706e+06	207874	886009	804029	607773	468660	215003	385593					360672	517453			288520		15196.2	42555.8	1.06249e+06	24287.3	264448	104001	239547	148637	73994.5	141459					61325.4	472576
QCASLQAAIADAEQR	1xCarbamidomethyl [C2]	4.89542e-05	0.000276662	1	1	3	P48668	P48668 [401-415]		0	1631.78			151854		236927	514313	141561								201204		1.19062e+06						96206.2		70715.8	66526.1	55794.6								34210.9		639592
QCANLQNAIADAEQR	1xCarbamidomethyl [C2]	1.27013e-15	0.000276662	1	1	21	P13647	P13647 [406-420]		0	1701.8	1.88408e+06	1.01802e+06	1.03499e+06	2.11081e+06	1.46587e+06	2.3948e+06	1.98697e+06	777022	1.01895e+06	1.01394e+06		296194	3.36594e+06	3.75929e+06	266031	202851	2.31445e+06	408849	549335	962467	414523	282832	655715	246620	437522	309766	783143	246434	350678	371972		80663.2	568235	475155	45233.6	185258	1.24331e+06	185269
QCANLQAAIADAEQR	1xCarbamidomethyl [C2]	3.87375e-14	0.000276662	2	2	5	P04259; P02538	P04259 [401-415]; P02538 [401-415]		0	1658.79	852112		453609			980252							1.60849e+06	1.37184e+06	766522		645500				187477		287382			126795							271543	173394	130332		346759
QAVDTAVDGVFIR		4.82054e-13	0.000276662	1	1	11	P19827	P19827 [42-54]		0	1390.73	1.02755e+06	854900	204576			326973	403779	389902	194891	411148		426902		138138	126771	388727	380963	820390	333011	538630	226076	237513	129608			42293.8	159145	123658	67072.9	150833		116259		17460	21555	355014	204651	371757
QATLEGLQEVVGR		3.39639e-13	0.000276662	1	1	1	Q9Y6C2	Q9Y6C2 [529-541]		0	1399.75															244975	513158		1.2159e+06		201625															41653.3	468654		550981
QASLEQANSFPR		1.38904e-16	0.000276662	1	1	10	Q8N699	Q8N699 [147-158]		0	1347.67	376259	505612	621700		553844	141839	379552	411852	779299	578248		317481	1.13004e+06	1.07593e+06	160605	700953	274901	207854	532048	1.26912e+06	82782.2	140472	393876		165306	18346.8	149596	130620	268200	212136		86460.4	190772	135992	27307.9	640163	147675	94188.6
QCGHQISACHR	2xCarbamidomethyl [C2; C9]	0.001805	0.000276662	1	1	4	P03952	P03952 [103-113]		0	1353.59	68353.9			136629		244080						943798	344240	274489	3.22486e+06	785344	214156	516889		309055	15038.8			15963.3		31571.6						257027	58114.3	34694	548325	717235	115044	234227
QASALIDRPAPHFER		4.27651e-09	0.000276662	1	1	1	P11171	P11171 [519-533]		0	1707.89	109672	372025	211147	135630	240163	136027	810292	436220	294145	180251					237597	160099	538578			372171	24129.3	103358	133771	15846.6	71681.8	17595.1	319368	138348	101232	66126.7					40398.9	146214	289321
QAPGQGLEWMGIINPSGGSTSYAQK	1xOxidation [M10]	0.000641099	0.000276662	1	1	2	P01743	P01743 [58-82]		0	2593.24			97575.8									131343				315111	99920		239788				61818.7									35768.9				287783	53676.5
QAPGQGLEWMGIINPSGGSTSYAQK		2.47255e-19	0.000276662	1	1	2	P01743	P01743 [58-82]		0	2577.24
QALAQISLPR		0.00186534	0.000276662	1	1	3	P05164	P05164 [692-701]		0	1096.65								4.51219e+06	196130			1.21339e+06				312858	895361	433513	1.45451e+06									1.43105e+06	67499.4			330444				285725	480983	196445
QAGPASVPLR		2.58197e-06	0.000276662	1	1	12	P30101	P30101 [131-140]		0	995.563	204785	377201	222159	349434	290561	315878	370464	1.55294e+06	208590	200049		1.24704e+06	1.0961e+06	1.03634e+06	610705	272873	732337	335472	216204	1.16403e+06	45055.5	104796	140748	40826.8	86724	40858.6	146014	492519	71787.4	73389.7		339609	185042	130988	103839	249208	393408	152018
QAGLGNHLSGSER		9.79139e-05	0.000276662	1	1	4	Q15582	Q15582 [397-409]		0	1325.66	915769	3.03814e+06	1.4178e+06	386372	625848	1.91496e+06	3.05413e+06	925811	1.54773e+06	1.53098e+06		1.32244e+06	1.12038e+06	5.13933e+06	2.37981e+06	1.42203e+06	2.21016e+06		2.63142e+06	5.78848e+06	201482	844074	898239	45142.4	186798	247699	1.20375e+06	293623	532659	561653		360143	189142	649585	404642	1.2987e+06	1.18729e+06
QAAASATQTIAAAQHAASTPK		1.85254e-20	0.000276662	1	1	13	Q9Y490	Q9Y490 [923-943]		0	1995.03	752649	1.29298e+06	679681		732103	318981	2.18107e+06	1.82447e+06	721036	291467		4.71873e+06	1.30117e+07	1.07041e+07	4.4581e+06	874583	1.03516e+06	289033	1027263	3.35401e+06	165593	359224	430609		218512	41260.1	859645	578636	248149	106927		1285062	2.19663e+06	1.35295e+06	758014	798734	556080	130974
QAQCGQDFQCK	2xCarbamidomethyl [C4; C10]	2.21901e-12	0.000276662	1	1	2	P07357	P07357 [93-103]		0	1369.56				230751	398521	443118	191195	372379	235559	536314		733321		150264		728188			2.2774e+06	267717				26960.2	118947	57317	75357.5	118101	81069	196752		199707		18992.6		665036
QELSEAEQATR		6.14999e-14	0.000276662	1	1	17	P01024	P01024 [429-439]		0	1261.6	1.45994e+06	1.18233e+06	1.13644e+06	2.38286e+06	1.26669e+06	2.37601e+06	2.43797e+06	1.00119e+06	1.28235e+06	1.15823e+06		1.26429e+06	524572	1.97933e+06	1.27736e+06	1.75079e+06	1.98999e+06	2.07171e+06		1.59852e+06	321207	328481	719985	278405	378072	307335	960898	317529	441329	424907		344306	88557.8	250177	217191	1.59895e+06	1.06901e+06	938792
QCQTLQVSVADAEQR	1xCarbamidomethyl [C2]	1.11102e-11	0.000276662	1	1	2	P19013	P19013 [389-403]		0	1732.83			138962			66517.8	116453						1.8371e+06	1.67631e+06					229557	53272			88038.9			8604.04	45898.9						310138	211877
QCVYDLCAQK	2xCarbamidomethyl [C2; C7]	1.17019e-07	0.000276662	1	1	9	Q9Y6R7	Q9Y6R7 [5075-5084]		0	1284.57	6.04058e+06	3.08007e+06	3.46416e+06	1.48436e+06	2.68542e+06	901519	1.96737e+06	2.47682e+06	4.16236e+06	2.27477e+06		1.85508e+06	4.97225e+06	3.7862e+06	2.80804e+06	1.27286e+06	3.10965e+06	555964	1695221	1.32384e+06	1329011	855724	2194707	173427	801520	116611	775417	785528	1.4325e+06	834519		505198	839411	478557	477454	1.16247e+06	1.67049e+06	251934
QELAVFCSPEPPAK	1xCarbamidomethyl [C7]	1.4611e-15	0.000276662	1	1	5	Q9Y490	Q9Y490 [2155-2168]		0	1572.77												732925	1.22559e+06	2.17369e+06	927670																	199599	206902	274743	157733
QEKPSSPSPMPSSTPSPSLNLGNTEEAIR	1xOxidation [M10]	1.00181e-10	0.000276662	1	1	1	O95810	O95810 [20-48]		0	3054.47
QEKPSSPSPMPSSTPSPSLNLGNTEEAIR		1.31756e-07	0.000276662	1	1	1	O95810	O95810 [20-48]		0	3038.47				549464													642636							64197.6													345221
QEEASGGPTAPK		0.000241359	0.000276662	1	1	3	P50552	P50552 [241-252]		0	1171.56	1.59071e+06		633531	345610	1.53244e+06	916431	435684	579711	1.16405e+06	796865	2.4493e+06	297195	1.06267e+06	783554	476994	124930	1.09006e+06		466799	903819	349978		401371	40380	457389	118540	171720	183857	400615	292337	92733.8	80935.9	179399	99037.3	81103.8	114096	585576
QEDVIATANLSR		1.3977e-12	0.000276662	1	2	8	Q9Y490	Q9Y490 [2198-2209]		0	1316.68	155661	701951	195281	203040	539060	228668	1.16426e+06	1.32074e+06	529266	309780		2.06689e+06	4.89713e+06	4.33066e+06	2.21738e+06	445636	349374		400969	1.22967e+06	34247.5	195020	123719	23722.5	160894	29578	458880	418876	182150	113646		562880	826729	547373	377023	406988	187682
QEDACQGDSGGPHVTR	1xCarbamidomethyl [C5]	3.71434e-14	0.000276662	1	1	2	P00742	P00742 [411-426]		0	1713.72		95694.2				58419.3	201104	103346		60185.6		143547		89761.2	45961.4	2.51279e+06	219926		106009	205285		26586.3				7556.5	79263.1	32776.3		22079.7		39092.6		11345.4	7814.85	2294866	118143
QCVPHDQCACGVLTSEK	3xCarbamidomethyl [C2; C8; C10]	4.46005e-09	0.000276662	1	1	1	P22891	P22891 [164-180]		0	1988.86													785303			722917	69868.1																132574			660222	37532.7
QEATTVSCFR	1xCarbamidomethyl [C8]	0.000641099	0.000276662	1	1	2	P26927	P26927 [276-285]		0	1198.55	166519	98261					65145.3					59638.3			150136	86088.5	197809		1.50137e+06	137248	36636.4	27299.5					25676.3					16241.4			25527.7	78622.4	106262
QDLGSPEGIAVDHLGR		1.52784e-06	0.000276662	1	1	3	P14543	P14543 [1018-1033]		0	1663.84													44523.9					263863															7516.49					119569
QDIAFAYQR		2.5222e-05	0.000276662	1	1	17	P07355	P07355 [69-77]		0	1111.55	1.25628e+06	751061	553012	2.32002e+06		1.74692e+06	776924	740679	672319	447438		633173	1.19819e+06	1.08462e+06	521168	330056	279128		213606	914351	276399	208664	350358	271064		225964	306216	234908	231382	164147		172434	202278	137090	88614.6	301431	149946
QDGSVDFGR		0.000100052	0.000276662	1	1	24	P02675	P02675 [286-294]		0	980.443	1.42268e+07	7.15317e+06	3.2621e+06	1.95665e+07	9.10484e+06	2.42257e+07	3.86286e+06	8.15847e+06	3.80725e+06	3.78915e+06	297492	2.71244e+07	2.64205e+07	8.64169e+06	3.01383e+07	3.53711e+07	6.68661e+06	5.36419e+08	3.71515e+07	2.09465e+07	3.1301e+06	1.98733e+06	2.06669e+06	2.28609e+06	2.71753e+06	3.13359e+06	1.52251e+06	2.58748e+06	1.31029e+06	1.39009e+06	11263.5	7386851	4.46028e+06	1.09227e+06	5124447	3.23035e+07	3592010	2.43077e+08
QDGHLWCSTTSNYEQDQK	1xCarbamidomethyl [C7]	9.52377e-12	0.000276662	1	1	5	P02751	P02751 [380-397]		0	2196.93	950583	1.00802e+06	578935	893455	1.15053e+06	985189	953059	1.14521e+06	902985	1.06157e+06		509770		702890	760774	949827	456888		731193	1.28174e+06	209141	280053	366782	104388	343400	127434	375638	363207	310767	389447		138827		88841.7	129355	867452	245438
QDATVQTER		4.16068e-05	0.000276662	1	1	2	Q12888	Q12888 [1192-1200]		0	1047.51					96121.4							76556		127658	112111			759142							28689.5							20848.7		16135.4	19062.3			344003
QDACQGDSGGVFAVR	1xCarbamidomethyl [C4]	4.24321e-23	0.000276662	1	1	14	P00736	P00736 [647-661]		0	1566.7	1.08533e+06	1.98662e+06	591143	1.05041e+06	2.09327e+06	1.75299e+06	2.29796e+06	3.51377e+06	2.27527e+06	2.59553e+06		2.62168e+06	5.67701e+06	842424	1.03626e+06	1.90549e+06	2.40389e+06	1.23038e+06	2.48154e+06	4.02209e+06	238788	551934	374516	122727	624781	226748	905715	1.1144e+06	783047	952193		713969	958387	106478	176196	1.74024e+06	1.29136e+06	557544
QDTYLQIAAFTR		0.000466799	0.000276662	1	1	2	Q6Q788	Q6Q788 [290-301]		0	1426.73
LLPYLAEDELR		5.89173e-08	0.000276662	1	1	5	P13224	P13224 [128-138]		0	1331.72		270937	375894		490493		357527	1.11678e+06	377834	406439		4.02566e+06		5.734e+06	404334	1.34655e+06	276340	30301.8	1.90459e+06	991576		75273.3	238146		146398		140915	354190	130034	149106		1.09632e+06		724749	68749.2	1.22977e+06	148448	13731.2
NNEGTYYSPNYNPQSR		1.1954e-09	0.000276662	1	1	2	P00450	P00450 [485-500]		0	1903.82							179144	614727		86124.3		411259					211781		189097	316739							70607.9	194962		31595.5		111999					113767
NMQDMVEDYR	1xOxidation [M]	1.51506e-08	0.000276662	1	1	36	P04264	P04264 [258-267]		0	1316.52	3.77015e+07	2.0185e+07	1.27259e+07	8.32107e+07	1.94763e+07	7.04294e+07	2.29278e+07	1.49008e+07	2.20352e+07	1.09246e+07	9.36617e+06	9.48947e+06	9.59805e+07	5.56605e+07	2.55465e+07	9.46703e+06	2.11151e+07	8.79334e+06	1.40163e+07	2.17671e+07	8.29486e+06	5.60791e+06	8.06242e+06	9.72207e+06	5.81313e+06	9.11e+06	9.03674e+06	4.72581e+06	7.58354e+06	4.00779e+06	354616	2.58429e+06	16203343	7.0352e+06	4.34369e+06	8.646e+06	1.13429e+07	3.98468e+06
MSTVHEILCK	1xCarbamidomethyl [C9]; 1xMet-loss+Acetyl [N-Term]	1.56173e-08	0.000276662	1	2	10	P07355	P07355 [1-10]	P07355 1xMet-loss+Acetyl [N-Term]	0	1128.57	1.16836e+06	834314	677149	569089		1.09034e+06	882954	1.4037e+06	2.63994e+06	1.24995e+06		724258	1.17989e+06	1.39787e+06		650451	1.20849e+06	501478	289947	2.37693e+06	257056	231794	429005	66490.5		141034	348007	445188	908551	458556		197239	199187	176684		594040	649194	227243
MSQQHTLPVTLSPALSQELLK	1xMet-loss+Acetyl [N-Term]	9.84026e-18	0.000276662	1	1	4	P07476	P07476 [1-21]	P07476 1xMet-loss+Acetyl [N-Term]	0	2232.22
MSGECAPNVSVSVSTSHTTISGGGSR	1xCarbamidomethyl [C5]; 1xOxidation [M1]	9.70552e-54	0.000276662	1	1	18	P04264	P04264 [493-518]		0	2581.16	1.14518e+06	2.03603e+06	7.63752e+06	1.76387e+06	9.59854e+06	1.15236e+07	9.78122e+06	4.59254e+06	3.84579e+06	3.71025e+06		4.3731e+06	3.30975e+06	1.44656e+06	3.37599e+06	4.35902e+06	1.81996e+06	2.66082e+06	4449752	739350	251955	565663	4.83872e+06	206085	2.86489e+06	1.49058e+06	3.85516e+06	1.45653e+06	1.32355e+06	1.36114e+06		1190936	558750	182837	574022	3980985	977670	1.20575e+06
MSGECAPNVSVSVSTSHTTISGGGSR	1xCarbamidomethyl [C5]	1.39679e-35	0.000276662	1	1	12	P04264	P04264 [493-518]		0	2565.17		303449	1.82702e+06		2.03854e+06	1.29366e+06	2.7491e+06	1.37789e+06	557141	803386		1.89895e+06			618153	2.32261e+06	365914	1.02159e+06	2825499	182117		84306	1.1575e+06		608445	167334	1.08353e+06	437002	191743	294730		517147			105105	2.12118e+06	196567	462933
MSETVICSSR	1xCarbamidomethyl [C7]; 1xMet-loss+Acetyl [N-Term]	0.000338791	0.000276662	1	1	6	P50552	P50552 [1-10]	P50552 1xMet-loss+Acetyl [N-Term]	0	1080.5	884020	276209	368837	127712	760128	440422	379465	491166	775667	450427			1.45876e+06	939534	348421	52716.6	477770	157456		661846	194497	76738	233675	14921.5	226876	56968.4	149562	155775	266950	165244			246267	118752	59242.4	48144.8	256655	71350.9
MSETAPAAPAAPAPAEKTPVKK	1xMet-loss+Acetyl [N-Term]	2.92054e-11	0.000276662	1	1	1	P10412	P10412 [1-22]	P10412 1xMet-loss+Acetyl [N-Term]	2	2074.12	237308	124726				120264						1.15509e+06		102756	168374						52211.1	34652				15556						314567		12987.8	28628.7
MSVEADINGLR	1xOxidation [M1]	1.25347e-10	0.000276662	1	2	17	P02533	P02533 [212-222]		0	1220.59	7.20207e+06	1.57734e+06	1.08852e+06	1.8564e+07	1.23324e+06	1.33841e+07	3.35683e+06	1.06622e+06	2.66793e+06	733786		959380	2.13238e+06	2.48254e+06	2.36057e+06	813154	946691	875375	946642	2.61703e+06	1.58456e+06	438225	689624	2.16896e+06	368088	1.73123e+06	1.32306e+06	338155	918182	269196		261270	359987	313780	401370	742632	508557	396674
MSDLSVIGHPIDSESK	1xOxidation [M1]	1.05277e-05	0.000276662	1	1	3	P13611	P13611 [1337-1352]		0	1730.83	894322	739038	212481	900915	577368	1.70172e+06	684253	1.59734e+06	518194	641961		893875	350541	1.67667e+06	588839		461184	766460	57453	1.70797e+06	196763	205324	134616	105260	172328	220117	269691	506600	178339	235509		243431	59178	211922	100121		247745	347319
MSDKPDMAEIEK	1xMet-loss+Acetyl [N-Term]	4.77532e-08	0.000276662	1	1	8	P62328	P62328 [1-12]	P62328 1xMet-loss+Acetyl [N-Term]	0	1304.6	9.10552e+06	4.12011e+06	1.02241e+07	1.00477e+07	1.93786e+07	5.79658e+06	7.44705e+06	7.94076e+06	7.40111e+06	1.22938e+07		4.79092e+06	7.11328e+06	8.9069e+06	9.8691e+06	2.54666e+06	5.10375e+06		5.55873e+06	5.20648e+06	2.00334e+06	1.14467e+06	6477419	1.17394e+06	5.78396e+06	749785	2.93517e+06	2.51843e+06	2.54713e+06	4.51011e+06		1.30472e+06	1.20086e+06	1.12579e+06	1.67805e+06	2.3258e+06	2.74171e+06
MSAVEGICTSESPVIDHQGTK	1xCarbamidomethyl [C8]; 1xOxidation [M1]	0.000183131	0.000276662	1	1	1	P01031	P01031 [859-879]		0	2262.04
MSAVEGICTSESPVIDHQGTK	1xCarbamidomethyl [C8]	1.09052e-23	0.000276662	1	1	1	P01031	P01031 [859-879]		0	2246.04											129673					348677		285638	1.4938e+06												4909.59					318438		129436
MREWFSETFQK	1xOxidation [M1]	5.61784e-05	0.000276662	1	1	3	P02654	P02654 [64-74]		1	1504.69	6.39535e+06	1.06592e+06	3.60279e+06	3.03635e+06			1.23023e+06		169257	7.23536e+06			109917	1.18308e+07	1.10209e+06	1.67696e+06	3.65946e+06		1.60635e+07	3.0457e+06	1.40707e+06	296139	2.28254e+06	354758			484884		58250.7	2.65436e+06			18556	1.49535e+06	187389	1.53152e+06	1965840
MREWFSETFQK		0.000954018	0.000276662	1	1	1	P02654	P02654 [64-74]		1	1488.69																			3.9652e+06
MPVCGSTGDALVFIEK	1xCarbamidomethyl [C4]; 1xOxidation [M1]	0.000526028	0.000276662	1	1	2	P78509	P78509 [2344-2359]		0	1739.83																256220			172029	40585.7																233999
MSDKPDMAEIEK	1xOxidation [M7]; 1xMet-loss+Acetyl [N-Term]	1.69129e-11	0.000276662	1	1	5	P62328	P62328 [1-12]	P62328 1xMet-loss+Acetyl [N-Term]	0	1320.6	931035	1.18412e+06	373187	1.45173e+06	1.6288e+06	1.47824e+06	1.48428e+06	1.54836e+06	2.03245e+06	855896		1.86857e+06	1.02989e+07	5.25695e+06	4.93778e+06	529251	696055		434930	2.03734e+06	204841	328979	236431	169615	486151	191210	585012	491065	699480	313994		508871	1.73864e+06	664451	839576	483351	373917
MPVCGSTGDALVFIEK	1xCarbamidomethyl [C4]	2.87978e-06	0.000276662	1	1	1	P78509	P78509 [2344-2359]		0	1723.84																440473			157148																	402273
MTDQVNYQAMK		2.06424e-09	0.000276662	1	1	5	Q13201	Q13201 [324-334]		0	1328.6	220272	412197	121590		219420		645038	123410	238575			1.40096e+06	2.37952e+06	598721	521070	955411	167219	93667.4	1613488	1.07919e+06	48462.9	114519	77032.9		65490.6		254235	39139.9	82107			381527	401708	75675.2	88598.1	872553	89829.1	42445.1
MTQSPSSFSASTGDR		0.000553156	0.000276662	1	1	2	A0A0C4DH67	A0A0C4DH67 [24-38]		0	1558.68	72108.2			87148.8				456313		351998		305899		75496.1	83141.1						15864.8			10182.2				144721		129134		83306.3		9542.33	14136.6
MVSGFIPLKPTVK	1xOxidation [M1]	5.63674e-16	0.000276662	2	2	14	P01023; P20742	P01023 [1385-1397]; P20742 [1391-1403]		0	1432.82	1.3794e+06	861745	1.30626e+06				1.32846e+06		2.71314e+06	2.53925e+06		440026		1.07202e+06	3.62421e+06	1.61587e+06	812312		1.54461e+06	1.95605e+06	303486	239415	827578				523600		933742	931547		119833		135498	616228	1.47574e+06	436370
MVNFTVDQIR	1xMet-loss [N-Term]	0.000149398	0.000276662	1	1	4	P13639	P13639 [1-10]	P13639 1xMet-loss [N-Term]	0	1091.58	372569				493607	495962						1.10431e+06								477894	81970.5				147328	64152.5						300738
MVLSPADKTNVK	1xMet-loss [N-Term]	6.9318e-07	0.000276662	1	1	4	P69905	P69905 [1-12]	P69905 1xMet-loss [N-Term]	1	1171.67	916009	6.51411e+06	731666	785691	702737	1.00447e+06	4.28355e+06	2.23097e+06	1.97155e+06	1.30518e+06		6.37839e+06		1.15824e+06	7.16087e+06	1.91557e+06	6.81307e+06		2.13046e+06	2.76609e+06	201535	1.80979e+06	463544	91797.6	209747	129927	1.68832e+06	707558	678519	478817		1.73704e+06		146395	1.21757e+06	1.74944e+06	3.65995e+06
MVGLEGSDK	1xOxidation [M1]	9.47708e-07	0.000276662	1	1	19	Q15485	Q15485 [37-45]		0	951.445	5.3694e+06	1.47457e+07	3.26973e+06	2.8035e+07	7.59313e+06	1.36175e+07	8.88196e+06	1.31536e+07	3.72534e+06	9.46936e+06	2.9071e+07	8.79801e+06	1.64577e+07	1.26406e+07	8.43878e+06	5.02171e+06	5.97543e+06	1.0445e+07	3.93885e+06	9.76078e+06	1.18134e+06	4.09675e+06	2.07152e+06	3.27552e+06	2.26633e+06	1.76142e+06	3.50073e+06	4.1717e+06	1.2821e+06	3.47392e+06	1.10067e+06	2.39598e+06	2.77838e+06	1.59771e+06	1.43485e+06	4.5862e+06	3.20997e+06	4.7331e+06
MVGLEGSDK		1.78843e-05	0.000276662	1	1	15	Q15485	Q15485 [37-45]		0	935.45	2.27974e+06	1.10192e+07	3.3393e+06	3.98572e+07	8.49854e+06	1.41275e+07	1.08273e+07	3.20477e+07	3.8729e+06	1.87399e+07		1.47465e+07		1.05522e+07	2.00856e+07	8.47077e+06	1.03794e+07	1.43529e+07	8.00997e+06	1.55425e+07	501574	3061410	2115598	4656783	2.53657e+06	1.82739e+06	4.26746e+06	1.0164e+07	1.33288e+06	6874896		4.01596e+06		1.33374e+06	3.41517e+06	7736134	5.57574e+06	6503983
MVGDVTGAQAYASTAK		1.34232e-20	0.000276662	1	3	3	Q01629	Q01629 [88-103]		0	1569.76	94984.2							656570	473505	325831		226849		154702	52413.2	379175	234609	1.81671e+06	476039	472472	20897.9							208233	162959	119534		61778.3		19553.6	8911.86	346291	126031	823235
MTDQVNYQAMK	1xOxidation [M]	0.000102231	0.000276662	1	1	2	Q13201	Q13201 [324-334]		0	1344.59	125166	269605	52726.4		112609		150311	98512.3	64624.9			1.29582e+06		689873	608452	397970	43534.9		716135	951846	27538.3	74903.2	33404.6		33610.5		59243.4	31243.4	22241			352893		87196.4	103456	363456	23386.7
MVETALTPDACYPD	1xCarbamidomethyl [C11]; 1xOxidation [M1]	0.000129157	0.000276662	1	1	26	P01591	P01591 [146-159]		0	1598.67	2.98028e+07	1.74024e+07	2.92041e+07	7.01549e+07	3.3155e+07	2.64735e+07	1.75065e+07	4.04201e+07	2.61278e+07	2.73321e+07	5.28617e+07	2.2965e+07		3.79008e+07	4.55813e+07	2.96466e+07	2.0545e+07	4.76475e+06	2.78163e+07	1.93219e+07	6.55703e+06	4.83484e+06	1.85022e+07	8.19667e+06	9.89583e+06	3.42433e+06	6.9e+06	1.28193e+07	8.99202e+06	1.00271e+07	2.00142e+06	6.2541e+06		4.79047e+06	7.75023e+06	2.70755e+07	1.10367e+07	2.15913e+06
MVCGPSGSQLVLLK	1xCarbamidomethyl [C3]	1.52504e-10	0.000276662	1	1	1	P26927	P26927 [560-573]		0	1488.79																			271466
MVAAATNNLCEAANAAVQGHASQEK	1xCarbamidomethyl [C10]	1.3475e-13	0.000276662	1	1	4	Q9Y490	Q9Y490 [2399-2423]		0	2556.19												859117																				233965
MTVTDQVNCPK	1xCarbamidomethyl [C9]; 1xOxidation [M1]	1.23216e-12	0.000276662	1	1	28	P05090	P05090 [177-187]		0	1308.59	5.02752e+06	1.07607e+07	3.26468e+06	2.47624e+06	2.38819e+06	3.16138e+06	8.16888e+06	1.33297e+07	4.87198e+06	6.56151e+06		2.67701e+07	3.52448e+06	3.81754e+06	6.20339e+06	1.19103e+07	2.71524e+07	2.14696e+06	1.16642e+07	1.86169e+07	1.10612e+06	2.98959e+06	2.06832e+06	289316	712807	408923	3.21968e+06	4.22756e+06	1.67672e+06	2.40715e+06		7.29038e+06	594999	482517	1.05477e+06	1.08774e+07	1.45861e+07	972891
MTVTDQVNCPK	1xCarbamidomethyl [C9]	1.26029e-11	0.000276662	1	1	19	P05090	P05090 [177-187]		0	1292.6	3.32669e+06	8.71341e+06	3.22462e+06	1.58982e+06	2.13783e+06	1.60569e+06	9.14957e+06	2.68273e+07	4.68877e+06	7.08051e+06	212804	3.45672e+07	3.75548e+06	2.51879e+06	2.97628e+06	1.88468e+07	3.78651e+07	4.7709e+06	2.11452e+07	1.65748e+07	731919	2.42081e+06	2.04295e+06	185749	638081	207696	3.60621e+06	8.50833e+06	1.61367e+06	2.59755e+06	8057.05	9.41376e+06	633997	318362	506059	1.72123e+07	2.03409e+07	2.16192e+06
MTSNFPVDLSDYPK	1xOxidation [M1]	4.67668e-10	0.000276662	1	1	12	P04114	P04114 [1189-1202]		0	1629.75	937675	880003	2.23932e+06		244797	151799	1.29653e+06	1.02236e+06	1.54873e+06	967251	398945	2.11216e+06		1.89134e+06	1.29843e+06	3.31783e+06	1.85146e+06		2.10904e+06	655613	206302	244488	1.41871e+06		73065	19635.1	511014	324244	533005	354845	15104.6	575209		239056	220774	3.03009e+06	994594
MTSNFPVDLSDYPK		0.00190608	0.000276662	1	1	4	P04114	P04114 [1189-1202]		0	1613.75	109835	135141	405867		72626.9		274276	243619	188662	195461		329611		104243	105193	1.109e+06	385573		476510	99681.4	24165.2	37545.8	257135		21677		108103	77264.3	64929.2	71706.6		89763.9		13175.8	17886.1	1.01282e+06	207127
MVCGPSGSQLVLLK	1xCarbamidomethyl [C3]; 1xOxidation [M1]	1.1367e-05	0.000276662	1	1	1	P26927	P26927 [560-573]		0	1504.79																			219824
MYEVVYQIGTETR		2.28807e-05	0.000276662	1	1	1	Q9UHG3	Q9UHG3 [292-304]		0	1588.77																156729		111651																		143136		50594.2
MNVAPACLPER	1xCarbamidomethyl [C7]; 1xOxidation [M1]	1.05277e-05	0.000276662	1	1	2	P00742	P00742 [336-346]		0	1273.6							74037.2									1.07533e+06	63081		55700.6	64895							29181									982069	33886.8
MNFRPGVLSSR	1xOxidation [M1]	9.02158e-06	0.000276662	1	1	5	Q14624	Q14624 [658-668]		0	1279.66		220232	163760	176554	144433		372966	420779	319820	244417	45298.1				943821	1.22508e+06	716129		292893	433779		61186.1	103749	20628	43109		147001	133451	110068	89666.7	1715.05				160479	1.11884e+06	384700
MDCQECPEGYR	2xCarbamidomethyl [C3; C6]	2.83095e-07	0.000276662	1	1	6	P21333	P21333 [2474-2484]		0	1444.53					88268.8		246096	279872				477210		1.04106e+06	423220		150717			388092					26345.7		96996	88762.1				129960		131584	71960.4		80964.2
MCVDVNECQR	2xCarbamidomethyl [C2; C8]; 1xOxidation [M1]	2.94572e-10	0.000276662	1	1	6	P23142	P23142 [396-405]		0	1326.52	456137	387228		328632		354284					65858.6		4.35886e+06			544238	321065		512953	819580	100357	107582		38396.3		45826.4					2493.5		735859			497039	172474
MCVDVNECQR	2xCarbamidomethyl [C2; C8]	8.66163e-10	0.000276662	1	1	9	P23142	P23142 [396-405]		0	1310.53		363392					274230	478336		213540		506087	364168	217651	129349	1.09732e+06	580054	235861	1.1224e+06	1.35602e+06		100960					108085	151705		78339		137824	61478.5	27509.9	21993.4	1.00215e+06	311602	106880
MCPQLQQYEMHGPEGLR	1xCarbamidomethyl [C2]; 2xOxidation [M1; M10]	2.54879e-22	0.000276662	1	1	10	P01023	P01023 [688-704]		0	2105.92	1.46673e+06	1.59008e+06	1.35418e+06	782724	1.97283e+06	938134	1.56191e+06	2.3177e+06	2.06662e+06	2.4193e+06		2.64023e+06	241070	2.86653e+06	6.85749e+06	2.55642e+06	1.41466e+06		2292985	2.31552e+06	322702	441765	857936	91450.9	588834	121347	615610	735064	711238	887544		719019	40697.2	362315	1.16598e+06	2.33471e+06	759949
MCPQLQQYEMHGPEGLR	1xCarbamidomethyl [C2]; 1xOxidation [M]	6.27621e-28	0.000276662	1	1	33	P01023	P01023 [688-704]		0	2089.93	1.91476e+06	3.36699e+06	2.48055e+06	717054	6.28371e+06	1.25634e+06	5.49714e+06	5.78874e+06	4.70376e+06	6.39002e+06		4.44729e+06	6.4754e+06	4.9776e+06	9.59794e+06	8.43909e+06	4.16678e+06	4.68599e+06	7.28801e+06	2.37171e+06	421274	935438	1.57155e+06	83778.3	1.87551e+06	162507	2.16664e+06	1.83591e+06	1.61882e+06	2.34424e+06		1.21114e+06	1.09317e+06	629144	1.63195e+06	7.70721e+06	2.23837e+06	2.12344e+06
MCPQLQQYEMHGPEGLR	1xCarbamidomethyl [C2]	1.14e-26	0.000276662	1	1	16	P01023	P01023 [688-704]		0	2073.93	781330	1.92053e+06	1.90623e+06		5.3178e+06		4.14118e+06	7.2236e+06	4.41781e+06	8.17974e+06	847017	5.37328e+06	2.09215e+06		5.17798e+06	1.83325e+07	6.0066e+06	6.11375e+06	1.48828e+07	3.35034e+06	171903	533573	1.20768e+06		1.58721e+06		1.6322e+06	2.29098e+06	1.52041e+06	3.00081e+06	32069.2	1.46332e+06	353195		880416	1.67426e+07	3.22671e+06	2.77043e+06
MDCQECPEGYR	2xCarbamidomethyl [C3; C6]; 1xOxidation [M1]	3.57356e-07	0.000276662	1	1	4	P21333	P21333 [2474-2484]		0	1460.52							119147	81402.8				259747	2.0032e+06	677688	278774	82797.4	69093.2		67750.6	187994							46960.4	25817.1				70737.6	338178	85656.3	47400.2	75616.8	37116.5
MATAEVLNIGK	1xMet-loss+Acetyl [N-Term]	9.02158e-06	0.000276662	1	1	2	P22234	P22234 [1-11]	P22234 1xMet-loss+Acetyl [N-Term]	0	1057.59								92293.6				267706	191296			211513	294013			256141								29271.1				72905.1	32294.3			193170	157942
MAGLNSLEAVK	1xMet-loss+Acetyl [N-Term]	5.55632e-09	0.000276662	1	1	4	P67936	P67936 [1-11]	P67936 1xMet-loss+Acetyl [N-Term]	0	1043.57	278216	507531	95339.4	202968	668346	1.57343e+06	1.1861e+06	814980	276693	231433		2.36953e+06		9.28753e+06	3.41301e+06	248333	670403	89932.3	208994	1.79503e+06	61211.3	141005	60401.9	23714.1	199482	203523	467488	258473	95225.3	84903.3		645298		1.1739e+06	580317	226796	360137	40752.6
MAGELTPEEEAQYKK	1xMet-loss+Acetyl [N-Term]	1.69666e-09	0.000276662	1	1	11	Q9NZT1	Q9NZT1 [1-15]	Q9NZT1 1xMet-loss+Acetyl [N-Term]	1	1634.79	1.6145e+06	708854	488608	2.71793e+06	2.00184e+06	3.11362e+06	1.23212e+06	1.30851e+06	858890	736352		1.08448e+06	3.70413e+06	3.91181e+06	1.31168e+06	182257	660002	7.007e+06	51329.1	1.41924e+06	355212	196938	309556	317554	597493	402744	485628	414998	295592	270138		295340	625329	494433	223026	166451	354550	3.1752e+06
MAEAELVQEGK		3.07214e-10	0.000276662	1	1	2	P31944	P31944 [213-223]		0	1204.59	210556	182704	65701.5	1.04198e+06	117073	482681	184604	221845	127636			271297	2.12521e+06	1.56303e+06	293826	98269.5	180356		209143	196421	46325.3	50759.9	41624.9	121741	34942.9	62434.6	72759.7	70358.8	43926.5			73882.9	358776	197559	49959.6	89747.1	96886.4
MADQLTEEQIAEFK	1xMet-loss+Acetyl [N-Term]	3.98678e-08	0.000276662	1	1	8	P0DP25	P0DP25 [1-14]	P0DP25 1xMet-loss+Acetyl [N-Term]	0	1563.75	186201	174447	150621	392195	446965	1.34123e+06	379418	914919	565246	333709	232010	457492		666461	547530	180569	265940	312616	79849.6	619913	40966.8	48465.8	95425.1	45822.8	133406	173488	149544	290169	194533	122424	8784.24	124590		84237.3	93097	164909	142861	141661
MADEAGSEADHEGTHSTKR		3.7785e-12	0.000276662	1	1	2	P02671	P02671 [603-621]		1	2028.87
MADEAGSEADHEGTHSTK	1xOxidation [M1]	2.0918e-32	0.000276662	1	1	11	P02671	P02671 [603-620]		0	1888.76				2.67535e+06	2.33165e+06	2.54573e+06	745414	2.10853e+06		274765		1.37451e+06		753992	2.2843e+06	4.24211e+06	423191	5.29102e+07	2.17855e+06	2.89211e+06				312579	695931	329289	293797	668724		100800		374324		95300.8	388401	3.87421e+06	227336	2.39761e+07
MANALASATCER	1xCarbamidomethyl [C10]; 1xMet-loss+Acetyl [N-Term]	1.64979e-09	0.000276662	1	1	10	P48059	P48059 [1-12]	P48059 1xMet-loss+Acetyl [N-Term]	0	1205.56	3.20955e+06	4.62446e+06	2.35503e+06	501095	2.38422e+06	7.22423e+06	2.63858e+06	105195	4.76281e+06	4.54638e+06		4.56815e+06	3.01709e+06	8.01372e+06	205501	1.15103e+06	2.14736e+06		1.38435e+06	8.90311e+06	706147	1.2848e+06	1.49202e+06	58546.3	711621	934450	1.03997e+06	33362.9	1.63915e+06	1.66788e+06		1.24406e+06	509342	1.01289e+06	34941.5	1.05121e+06	1.15355e+06
MNVAPACLPER	1xCarbamidomethyl [C7]	4.04349e-09	0.000276662	1	1	2	P00742	P00742 [336-346]		0	1257.61				86005.3		134605		326670		104528	120078			427629	1.15909e+06	2.06742e+06	227557			147170				10048.6		17411.1		103604		38347.1	4546.33			54050.1	197081	1.88812e+06	122242
MELERPGGNEITR		0.000651493	0.000276662	1	1	3	P02671	P02671 [259-271]		0	1501.74	124076	221712	74525.3	200561	148152		110664	87077.2	175980			108422		279385			177062	3.08285e+06	344985		27298.5	61597.4	47215.2	23432.9	44219.2		43616.9	27616.7	60564.6			29526.7		35312.8			95116.6	1.39698e+06
MFGCDVGPDGR	1xCarbamidomethyl [C4]; 1xOxidation [M1]	0.000236729	0.000276662	1	1	2	P30485	P30485 [122-132]		0	1226.49								408378		131068						307886			335695									129518		48083.6						281185
MLLQATDDVLR	1xOxidation [M1]	8.5924e-05	0.000276662	1	1	1	P26022	P26022 [72-82]		0	1290.67
MLDAEDIVGTARPDEK		2.37999e-12	0.000276662	1	1	1	P12814	P12814 [221-236]		0	1759.85
MKPVPDLVPGNFK	1xOxidation [M1]	3.47124e-07	0.000276662	1	1	9	P02671	P02671 [226-238]		0	1457.78	1.21938e+06	831893	751899	2.46567e+06	3.64452e+06	2.7805e+06	1.10561e+06	2.40297e+06	791135	1.04073e+06		2.99313e+06		1.13428e+06	3.37787e+06	5.76989e+06	486103	5.94704e+07	3.60064e+06	4.35579e+06	268280	231122	476362	288081	1.08778e+06	359656	435763	762107	272273	381803		815127		143367	574343	5269492	261132	2.69489e+07
MKELLETVVNR	1xOxidation [M1]	3.34915e-13	0.000276662	1	1	10	P55056	P55056 [54-64]		1	1347.73	865211	1.71548e+06	2.56876e+06				2.40998e+06	2.59208e+06	2.22962e+06	1.90738e+06				296917		760451	756714	561955	895010	472827	190358	476605	1.62743e+06				949868	822084	767338	699741				37528.8		694501	406503	254649
MKELLETVVNR		1.13902e-13	0.000276662	1	1	9	P55056	P55056 [54-64]		1	1331.74			587806				575295	657849		259325		627478	5.42864e+06			594209	248832		1.0069e+06				372402				226746	208638		95135.8		170882	916457			542676	133671
MHVLHCQGR	1xCarbamidomethyl [C6]; 1xOxidation [M1]	9.6887e-10	0.000276662	1	1	8	P10643	P10643 [745-753]		0	1153.54	342728	347360	56207.8	1.38475e+06	432351	819451	415293	832235	362247	538982		498092	161464	597809	1.11873e+06	941835	279190	1.19199e+06	3.10717e+06	1.67076e+06	75405	96505.7	35610.2	161790	129044	105995	163683	263945	124669	197731		135647	27258.2	75560	190219	860154	149979	540147
MESLGITSR	1xOxidation [M1]	0.000194464	0.000276662	1	1	6	P07357	P07357 [362-370]		0	1009.5	89200.4	132386	100537	228966	191462	289401	242911	386880	165894	292928	202969	1.0225e+06	403808	336414	576000	498616	283882	524252	2.60791e+06	321144	19625.3	36780.3	63694.6	26751.7	57146	37433.9	95740.7	122700	57093.3	107463	7684.71	278461	68170.4	42521	97937.8	455373	152500	237563
MHVLHCQGR	1xCarbamidomethyl [C6]	1.21226e-09	0.000276662	1	1	2	P10643	P10643 [745-753]		0	1137.54	152111						263426	454642	141126	200059				112498	223990	660831			2.99768e+06	428240	33466.4						103827	144191	48569.2	73393.4				14219.1	38085.2	603520
MGLAFESTK	1xOxidation [M1]	3.27724e-09	0.000276662	1	1	69	P04114	P04114 [306-314]		0	999.482	5.59941e+07	5.88399e+07	1.10699e+08	9.39101e+06	1.43209e+07	9.86416e+06	6.30685e+07	3.65935e+07	7.09405e+07	3.57679e+07		6.65866e+07	5.06208e+07	4.49541e+07	5.12051e+07	1.26733e+08	5.46321e+07	1.46807e+07	4.5454e+07	1.97058e+07	1.23195e+07	1.63473e+07	7.01328e+07	1.09722e+06	4.27438e+06	1.27592e+06	2.48578e+07	1.16057e+07	2.44146e+07	1.31218e+07		1.81337e+07	8.54576e+06	5.68197e+06	8.70645e+06	1.15742e+08	2.93481e+07	6.65253e+06
MGLAFESTK		6.00771e-07	0.000276662	1	1	36	P04114	P04114 [306-314]		0	983.487	1.01119e+07	1.62258e+07	3.63176e+07	1.57239e+06	5.79387e+06	1.68519e+06	3.15757e+07	2.06473e+07	2.60943e+07	1.69328e+07	85708	1.25533e+07		2.33999e+07	1.41375e+07	4.68207e+07	4.32234e+07	7.92212e+06	2.26574e+07	1.26762e+07	2.22477e+06	4.50794e+06	2.30089e+07	183713	1.7293e+06	217978	1.24452e+07	6.54835e+06	8.98051e+06	6.21197e+06	3245.03	3.41868e+06		2.95763e+06	2.40382e+06	4.27601e+07	2.32194e+07	3.58989e+06
MFTTAPDQVDKEDEDFQESNK	1xOxidation [M1]	2.9002e-20	0.000276662	1	1	3	P00450	P00450 [599-619]		1	2490.06							294493	5.32717e+06		210308		1.71784e+06				272632	1.12987e+06		644092	695890							116071	1.68952e+06		77153.6		467823				248987	606961
MFTQQQPQELAR	1xOxidation [M1]	1.001e-15	0.000276662	1	1	8	Q96CX2	Q96CX2 [63-74]		0	1492.72	1.86448e+06	1.37306e+06	292671	151570	203882	297764	249605	106378	277941	194758					259566	506297	778978		1.19893e+06	265391	410213	381471	185421	17708.9	60852.9	38515.6	98379	33738.1	95655.1	71448.8					44134.3	462388	418463
MFTQQQPQELAR		2.14434e-16	0.000276662	1	1	7	Q96CX2	Q96CX2 [63-74]		0	1476.73	402846	553769		77516.5					268045	153972			1.60328e+06		100857	1.1991e+06	1.069e+06	209400	1.24714e+06	208528	88631.6	153852		9056.78					92249.1	56486.3			270665		17148.7	1.0951e+06	574263	94889
MFLSFPTTK	1xOxidation [M1]	1.25847e-05	0.000276662	1	1	43	P69905	P69905 [33-41]		0	1087.55	1.57924e+07	3.91306e+07	1.38138e+07	3.83111e+06	6.00232e+06	8.29658e+06	5.518e+07	3.06405e+07	3.01229e+07	1.39623e+07		9.04799e+07	1.35969e+07	2.3226e+07	5.60157e+07	2.01159e+07	1.0289e+08	797748	3.35788e+07	3.38492e+07	3.47454e+06	1.08715e+07	8.75168e+06	447614	1.79152e+06	1.07316e+06	2.17486e+07	9.71771e+06	1.0367e+07	5.12222e+06		2.46406e+07	2.29541e+06	2.93565e+06	9.5244e+06	1.83713e+07	5.52718e+07	361497
MGVQVETISPGDGR	1xMet-loss [N-Term]	3.75803e-11	0.000276662	1	1	14	P62942	P62942 [1-14]	P62942 1xMet-loss [N-Term]	0	1314.66	554520	610622	251253	656687	662187	1.1662e+06	862507	1.35608e+06	721653	527764			3.85733e+06	1.66174e+06	947457	267792	524903	260643	216004	1.33309e+06	122002	169646	159180	76725.1	197644	150848	339948	430082	248361	193615			651190	210035	161097	244567	281975	118110
NMQDMVEDYR	2xOxidation [M2; M5]	1.41421e-09	0.000276662	1	1	32	P04264	P04264 [258-267]		0	1332.52	3.68893e+07	2.20291e+07	1.04131e+07	9.32501e+07	1.87398e+07	7.68107e+07	2.27322e+07	1.06119e+07	2.29432e+07	9.07264e+06		8.33557e+06	4.41177e+07	6.45539e+07	3.40584e+07	5.90463e+06	1.49058e+07	5.55341e+06	7.45454e+06	2.21181e+07	8.11616e+06	6.12025e+06	6.59719e+06	1.0895e+07	5.59329e+06	9.93542e+06	8.95967e+06	3.3656e+06	7.89604e+06	3.32838e+06		2.27004e+06	7.44791e+06	8.15928e+06	5.79098e+06	5.39254e+06	8.00729e+06	2.51651e+06
MYEVVYQIGTETR	1xOxidation [M1]	4.18092e-10	0.000276662	1	1	1	Q9UHG3	Q9UHG3 [292-304]		0	1604.76
MYLGYEYVTAIR	1xOxidation [M1]	4.21338e-14	0.000276662	1	1	15	P02787	P02787 [332-343]		0	1494.73	79015.1	139739	199542		584526	1.7919e+06	999693	4.76084e+06	746900	2.2941e+06		2.46163e+06			1.02286e+06	275586	369888	1.35117e+06	1446641	1.02789e+06	17384.4	38823	126419		174464	231781	394019	1.50991e+06	257050	841612		670382			173918	251686	198702	612280
NLNEKDYELLCLDGTR	1xCarbamidomethyl [C11]	5.02362e-18	0.000276662	1	1	11	P02787	P02787 [572-587]		1	1952.94	107729	217774	1.54058e+06		3.50175e+06	1.89649e+06	4.52885e+06	1.67058e+07	1.70015e+06	5.92366e+06		1.03483e+07			1.59256e+06	1.6775e+06	1.28821e+06	82935.4	9533504	1.36557e+06	23702	60503.4	976031		1.04517e+06	245310	1.785e+06	5298284	585115	2173152		2.81817e+06			270785	1.53202e+06	692017	37582
NILTSNNIDVK		1.1206e-10	0.000276662	1	1	10	P05090	P05090 [165-175]		0	1230.67	2.61041e+07	5.75531e+07	2.26413e+07	8.76574e+06	1.18913e+07	1.22301e+07	3.39461e+07	1.00911e+08	2.73985e+07	3.23174e+07		1.77606e+08		2.11932e+07	1.56127e+07	4.96328e+07	1.22012e+08	1.25199e+07	51920592	6.22273e+07	5.74328e+06	15989733	14344287	1.02416e+06	3549208	1.58195e+06	13379492	32004050	9429333	11855928		48367868		2.67872e+06	2.65464e+06	45328368	65544116	5673343
NLLFNDNTECLAR	1xCarbamidomethyl [C10]	6.29036e-13	0.000276662	1	1	15	P02788	P02788 [659-671]		0	1579.75	430149	576742	308263	1.17247e+06	1.44645e+06	2.12041e+06	1.17028e+06	3.38739e+06	1.00402e+06	1.04701e+06		3.16616e+06			607505	523733	1.62221e+06	759455	450769	909474	94638.8	160234	195299	136988	431725	274274	461255	1.07432e+06	345537	384105		862247			103295	478312	871444	344145
NLHFLTTQEDYTLK		8.78258e-05	0.000276662	1	1	2	Q08830	Q08830 [160-173]		0	1722.87	82837.2							128015			348698					912271			1.07116e+06		18225.3							40600.1			13202.2					833154
NLGTALAELR		0.00076253	0.000276662	1	1	6	Q9Y490	Q9Y490 [1026-1035]		0	1057.6		280211	195119		4.56906e+06		659280	779258	286200			2.12876e+06	2.00931e+06	2.56227e+06	1.11496e+06	413095	430708		578425	732539		77849.9	123617		1.36373e+06		259848	247143	98497.2			579730	339211	323858	189578	377270	231374
NIETIINTFHQYSVK		2.17526e-07	0.000276662	1	1	2	P06702	P06702 [11-25]		0	1806.94	138842		803784		938006		935310	1.20271e+06	199528	1.86985e+06						1.61341e+06	152089	1.74408e+06	1714549	38512.2	30547.3		509234		279968		368642	381442	68668.6	685972						1.47349e+06	81701.4	790325
NIPGDFECECPEGYR	2xCarbamidomethyl [C8; C10]	8.0003e-16	0.000276662	1	1	22	P07225	P07225 [219-233]		0	1842.74	2.89076e+06	1.51655e+06	2.16582e+06	2.11131e+06	1.87127e+06	1.82416e+06	1.46353e+06	2.56512e+06	1.80016e+06	1.70332e+06		2.2738e+06		1.4958e+06	2.29517e+06	1.56053e+06	1.5474e+06		1.67723e+06	1.31561e+06	636008	421336	1.37215e+06	246678	558519	235954	576835	813535	619535	624880		619229		189062	390250	1.42519e+06	831253
NIEDVIAQGIGK		8.22313e-05	0.000276662	1	1	1	P05387	P05387 [50-61]		0	1256.68	101365	84985.2		164981		158106	100101	187274	151598			257869		142425		407193	85986.8			175706	22301.7	23611.1		19275.9		20451	39453.7	59394.4	52173.4			70225.9		18001.8		371879	46191.7
NLDSTTVAVHGEEIYCK	1xCarbamidomethyl [C16]	1.32864e-06	0.000276662	1	1	2	P21291	P21291 [43-59]		0	1935.91								246390		307666		522934	280048	642597	372099													78143.2		112870		142412	47277.4	81221	63268.4
NLDIERPTYTNLNR		3.29501e-10	0.000276662	2	7	12	Q71U36; P68366	Q71U36 [216-229]; P68366 [216-229]		0	1718.88	594370	675479	861603	3.51362e+06	986606	383860	1.8758e+06	1.2217e+06	1.44129e+06	531107		1.90599e+06	3.31336e+06	2.45522e+06	1.21928e+06	956109	688229	575468	676842	1.91855e+06	130770	187666	545865	410520	294474	49652.1	739328	387465	496026	194841		519063	559359	310328	207315	873190	369713	260772
NLDLDSIIAEVK		4.09698e-14	0.000276662	6	7	18	P35908; P04259; P02538; O95678; P48668; P13647	P35908 [342-353]; P04259 [327-338]; P02538 [327-338]; O95678 [313-324]; P48668 [327-338]; P13647 [332-343]		0	1329.73		8.59636e+06		4.62359e+07	1.01343e+07	5.07828e+07	1.90782e+07		2.48358e+07	8.09688e+06				8.75348e+06	1.95233e+07		8.52073e+06	1.13119e+07		1.74178e+06		2.38829e+06		5.40205e+06	3.0248e+06	6.56873e+06	7519480		8547380	2970418				1.10639e+06	3319573		4577290	5125962
NKYEDEINKR		2.17458e-16	0.000276662	6	6	18	P04264; P04259; P02538; P48668; P05787; P13647	P04264 [268-277]; P04259 [251-260]; P02538 [251-260]; P48668 [251-260]; P05787 [177-186]; P13647 [256-265]		2	1308.65	1.2969e+08	1.15733e+08	7.0324e+07	2.61873e+08	9.14041e+07	3.61651e+08	1.08214e+08	4.13186e+07	9.78929e+07	3.99994e+07		4.36589e+07	4.60655e+08	8.3846e+06	1.09319e+08	2.79483e+07	7.89178e+07	1.95779e+06	45005513	1.03017e+08	2.85337e+07	3.21535e+07	44553493	3.05964e+07	2.72815e+07	4.67793e+07	4.26516e+07	1.31043e+07	3.36904e+07	1.46742e+07		1.18897e+07	7.77674e+07	1.05977e+06	1.85876e+07	2.55245e+07	4.23942e+07	887168
NKLNDLEEALQQAK		4.25231e-07	0.000276662	1	1	1	P35908	P35908 [440-453]		1	1613.85			188509	1.35259e+06		401058		317304	264724			118433		754423	178400		218495		330827				119429	158032		51876.7		100634	91106.4			32253.1		95355.3	30333.5		117374
NKLNDLEDALQQAK		9.34046e-11	0.000276662	1	1	6	P04264	P04264 [442-455]		1	1599.83	359100	835240	1.1492e+06	1.20729e+06	1.12388e+06	2.71523e+06	398896	1.06716e+06	3.02386e+06	588513		374357		2.63507e+06	1.11707e+06	664194	1.27733e+06		1.01815e+06	487995	79007	232051	728068	141056	335447	351214	157221	338454	1.04068e+06	215902		101950		333059	189936	606591	686173
NIDVFNVEDQK		8.46105e-07	0.000276662	1	1	5	Q8NBJ4	Q8NBJ4 [374-384]		0	1320.64	1.23053e+06	4.96943e+06				3.08276e+06															270733	1.38064e+06				398754
NKLEGLEDALQK		2.11451e-16	0.000276662	3	3	15	P04259; P02538; P48668	P04259 [425-436]; P02538 [425-436]; P48668 [425-436]		1	1357.73	3.95576e+06	1.80639e+06	2.89609e+06	882797	3.85178e+06	7.79935e+06	5.36444e+06	1.16981e+06	2.0185e+06	726520		655449	9.13529e+06	9.47263e+06	3.45401e+06	740823	1.28854e+07	1.69756e+06	1.26034e+06	990647	870322	501863	1.83481e+06	103143	1.14965e+06	1.00884e+06	2.11434e+06	371008	694678	266531		178500	1.54221e+06	1.19729e+06	587289	676575	6.92196e+06	769243
NIQEYLSILTDPDGK		4.63393e-08	0.000276662	1	1	3	P04114	P04114 [4447-4461]		0	1705.86			6.62051e+06													8.4269e+06	236440		2.08846e+06				4194395													7.69607e+06	127014
NLQNNAEWVYQGAIR		1.02308e-19	0.000276662	1	1	32	P04114	P04114 [4107-4121]		0	1775.88	5.06024e+06	6.72417e+06	2.55171e+07		3.60648e+06		3.9443e+06	6.42962e+06	1.17442e+07	8.29793e+06	215275	1.12032e+07	4.61851e+06	3.46181e+06	1.20322e+06	2.49208e+07	6.12411e+06	1.97249e+06	1.54922e+07	1.85278e+06	1.11332e+06	1.86815e+06	1.61663e+07		1.07643e+06		1.55461e+06	2.03917e+06	4.04182e+06	3.04417e+06	8150.61	3.051e+06	779692	437555	204584	22759511	3.28984e+06	893830
NMQDMVEDYR		4.23415e-08	0.000276662	1	1	16	P04264	P04264 [258-267]		0	1300.53	1.0446e+07	5.31672e+06	3.16291e+06	1.3669e+07	6.09791e+06	2.19718e+07	6.46602e+06	6.94522e+06	5.87636e+06	2.98368e+06		2.57866e+06	1.38458e+07	1.40664e+07	5.63629e+06	4.92366e+06	9.25753e+06	5.18194e+06	3.74004e+06	5.1658e+06	2.29827e+06	1.47712e+06	2.00385e+06	1.59705e+06	1.82005e+06	2.84204e+06	2.54851e+06	2.20269e+06	2.02238e+06	1.09459e+06		702253	2.33743e+06	1.77792e+06	958343	4.49666e+06	4.97309e+06	2348183
NMQDLVEDLK	1xOxidation [M2]	3.29861e-06	0.000276662	2	2	1	P04259; P48668	P04259 [241-250]; P48668 [241-250]		0	1220.58		183795	445702		308142	1.9704e+06	319694								495863		1.50396e+06		157206			51062.9	282373		91971.7	254871	126004								84312.1		807917
NMQDLVEDLK		2.02388e-05	0.000276662	2	2	3	P04259; P48668	P04259 [241-250]; P48668 [241-250]		0	1204.59	425068	179471	337893		257969	1.43725e+06	647426	115184	131901	71881.2			360315	395551	549163		1.74946e+06			128151	93520.8	49861.8	214071		76996.4	185907	255176	36530.8	45394.5	26370.3			60828	49995.6	93374.6		939802
NMQDLVEDFK	1xOxidation [M2]	7.74344e-10	0.000276662	1	1	15	P13647	P13647 [246-255]		0	1254.57	4.47086e+06	2.5184e+06	1.14693e+06	1.20024e+07	1.54464e+06	7.64379e+06	2.35247e+06	883179	1.42104e+06	822466		752089	6.71351e+06	4.63834e+06	3.38705e+06	715870	1.92042e+06	1.30164e+06	1.33464e+06	2.99509e+06	983652	699677	726630	1.40232e+06	461030	988720	927202	280102	489060	301729		204818	1.13337e+06	586263	575904	653785	1.03164e+06	589836
NMQDLVEDFK		5.78563e-06	0.000276662	1	1	8	P13647	P13647 [246-255]		0	1238.57	1.8339e+06	1.64147e+06	1.53612e+06	6.67193e+06	1.85601e+06	3.35632e+06	1.97666e+06	1.38634e+06	1.35518e+06	784791	555041	784787	5.14532e+06	3.07373e+06	1.37015e+06	1.51559e+06	2.14727e+06	174298	1.56443e+06	1.11719e+06	403484	456042	973205	779527	553965	434138	779082	439682	466393	287908	21014.6	213723	868628	388504	232967	1.38415e+06	1.1535e+06	78982.6
NMNKEDEGEITK	1xOxidation [M2]	0.000553156	0.000276662	1	1	9	P24821	P24821 [748-759]		1	1423.64	2.07998e+06	1.35146e+06	608044	5.29443e+06	1.67605e+06	3.12358e+06	1.36116e+06	3.09232e+06	1.07725e+06	1.03167e+06	3.9749e+06	2.34065e+06	4.10562e+06	2.98441e+06	1.56093e+07	831506	2.06774e+06	3.77161e+06	1.2228e+06	3.65888e+06	457624	375469	385224	618584	500252	404033	536487	980737	370740	378477	150495	637435	693108	377214	2654065	759393	1.11078e+06	1.7091e+06
NLQLLMDRVDEMSQDIVK		1.39664e-17	0.000276662	1	1	2	O15372	O15372 [242-259]		1	2147.08	6.02654e+06																				1.32592e+06
NMEVSVATTTK	1xOxidation [M2]	3.42561e-12	0.000276662	1	1	53	P04114	P04114 [3420-3430]		0	1196.58	2.54276e+07	2.40674e+07	4.71002e+07	3.09882e+06	6.88514e+06	3.35518e+06	1.93566e+07	1.83719e+07	3.16871e+07	1.67045e+07		4.31091e+07	2.89668e+07	3.92319e+07	1.75359e+07	6.74374e+07	1.78987e+07	2.72727e+06	3.05347e+07	1.4243e+07	5.59443e+06	6.68656e+06	2.98401e+07	362056	2.05502e+06	433991	7.62918e+06	5.82671e+06	1.09053e+07	6.12821e+06		1.174e+07	4.89014e+06	4.95871e+06	2.98164e+06	6.15888e+07	9.61511e+06	1.23586e+06
NMDPLNDNIATLLHQSSDK	1xOxidation [M2]	4.78364e-05	0.000276662	1	1	1	P35579	P35579 [588-606]		0	2142.01								75745.3	47426.9			198771							213616									24022.8	16322.2			54131.9
NLTDFAEQYSIQDWAK		1.91703e-16	0.000276662	1	1	5	P04114	P04114 [2560-2575]		0	1928.9			3.90595e+06				315945									5.22456e+06			1549551				2.4746e+06				124526									4.77145e+06
NLQYYDISAK		7.94641e-08	0.000276662	1	1	9	P62826	P62826 [143-152]		0	1214.61	2.63742e+06	532385	574982	1.57862e+06		1.88963e+06	435345	572861	923940	313921		652598		930085	698138	199256	322250	298087	161735	854959	580269	147910	364278	184441		244422	171587	181684	317979	115165		177723		117558	118705	181976	173111	135077
NIQTSESHPLR		3.4661e-09	0.000276662	1	1	5	Q12913	Q12913 [1186-1196]		0	1281.65	235993	402548	345447	77956.3	451158	438969	907038	583226	400759	298017			4.06295e+06	3.01812e+06	1.20589e+06	663801	370322		326548	943762	51921.8	111838	218856	9108.16	134658	56780.4	357500	184972	137924	109330			685903	381475	205039	606233	198935
NIQSLEVIGK		0.000338791	0.000276662	1	1	15	P02775	P02775 [76-85]		0	1100.63												4.19514e+07				907989			530616													11424713				829243
NLQPASEYTVSLVAIK		1.99461e-13	0.000276662	1	1	7	P02751	P02751 [1055-1070]		0	1732.95	1.70788e+06	2.80034e+06	2.16183e+06	1.26262e+06	4.50244e+06	4.55482e+06	2.72096e+06	4.62197e+06	3.97365e+06	6.39318e+06		4.22606e+06		427344	3.49755e+06	4.97111e+06	529929	8.43458e+06	1.73971e+06	1.54848e+06	375757	778007	1.36962e+06	147520	1.34385e+06	589163	1072436	1.46587e+06	1367555	2.3454e+06		1.15089e+06		54014.1	594692	4539987	284675	3.82211e+06
NMEVSVATTTK		5.1422e-12	0.000276662	1	1	31	P04114	P04114 [3420-3430]		0	1180.59	1.44088e+07	1.32649e+07	3.53904e+07	1.29457e+06	6.3218e+06	995462	1.52905e+07	1.63653e+07	1.75922e+07	1.40695e+07		3.19574e+07	5.62261e+07	1.4638e+07	5.48495e+06	5.69399e+07	2.10769e+07	6.84177e+06	3.44419e+07	8.26145e+06	3.17013e+06	3.68533e+06	2.24214e+07	151254	1.88688e+06	128763	6.02661e+06	5.19029e+06	6.05444e+06	5.16154e+06		8.70305e+06	9.49204e+06	1.85017e+06	932611	5.20017e+07	1.13224e+07	3100330
MYLGYEYVTAIR		6.63771e-10	0.000276662	1	1	9	P02787	P02787 [332-343]		0	1478.73	64746	56392.4	74196.1		289354	177393	387467	1.88446e+06	88028.9	764430		1.96328e+06			219274	1.15365e+06		562035	2.29208e+06	131995	14245	15667.3	47006.6		86363.8	22945.7	152716	597662	30295.6	280438		534664			37283.4	1.0536e+06		254685
NKDQGTYEDYVEGLR		0.000981856	0.000276662	1	1	6	P60660	P60660 [80-94]		1	1786.82		728519		1.45863e+06	521108	625439	351042	1.03758e+06	252574	320674		1.7345e+06	28579.2	546320	1.02302e+06	186595	264931	189185	719352	888790		202401		170422	155536	80900.1	138360	329071	86924.8	117642		472361	4824.72	69052.1	173945	170413	142319	85728.7
NHHGSAQEQLR		2.76141e-11	0.000276662	1	1	2	P20930	P20930 [2590-2600]; [2914-2924]		0	1276.61				464273	54218.5	137853	113362	79558	50931.6	153209			3.8154e+06	4.47228e+06			51485.5			91777.5				54244.2	16182.7	17831.2	44680.4	25232	17528.4	56206.1			644113	565274			27657.7
NCEQCKPFYYQHPER	2xCarbamidomethyl [C2; C5]	6.73134e-10	0.000276662	1	1	1	P07942	P07942 [373-387]		0	2055.88		245679			235707		186813			132326				188915		265608			217947	236142		68255.9			70351.9		73630.5			48545.1				23877.9		242573
NAVVQGLEQPHGLVVHPLR		2.92983e-09	0.000276662	1	1	5	Q07954	Q07954 [1695-1713]		0	2063.15		179293	1.48414e+06		537170		432063	312486	858184	319519					371935	1.07507e+06	253889		533397			49812.2	940272		160330		170293	99105.8	295349	117219					63240.5	981831	136388
NANTFISPQQR		1.08487e-08	0.000276662	1	1	2	P08493	P08493 [39-49]		0	1275.64	63576.4	50056.6		117267	84433.6	200459	204556	156562		115894		140507				493754		78780.9		313342	13987.7	13907		13701.1	25201	25929.3	80623.7	49654		42516.8		38264.7				450933		35699.4
NALWHTGNTPGQVR		4.43513e-06	0.000276662	1	2	11	P07996	P07996 [1078-1091]		0	1550.78	533560	2.62677e+06	1.15018e+06	171805	1.47891e+06	345863	2.44448e+06	628462	1.31039e+06	1.15725e+06		1.34932e+06		2.4238e+06	1.09251e+06	1.13677e+06	1.09156e+06	470020	1690700	1.31432e+06	117391	729786	728690	20073.2	441412	44737.2	963467	199318	450977	424547		367464		306356	185761	1.03818e+06	586381	212988
NAIHTFVQSGSHLAAR		2.88907e-27	0.000276662	1	1	8	P04040	P04040 [507-522]		0	1708.89	349526				128756		1.94802e+06	635900	176096	536403				286523	173254	1.13442e+06	2.45959e+06			817908	76900.5				38430		767790	201677	60604.3	196785				36215	29458.6	1.03603e+06	1.32128e+06
NALFCLESAWK	1xCarbamidomethyl [C5]	5.01595e-10	0.000276662	1	1	4	P01023	P01023 [1123-1133]		0	1338.65			476378		231398			48441.1								676080			373022				301807		69065.7			15363.2								617446
NCGQMSEIEAK	1xCarbamidomethyl [C2]	2.17875e-05	0.000276662	1	1	3	Q9Y490	Q9Y490 [285-295]		0	1266.55	250741	213981	51723.6		193922		498772	671432				1.26934e+06	2.02758e+06		405503	309023	345640		397798	785635	55166.6	59449.5	32769.2		57880.2		196586	212946				345683	342295		68948.1	282222	185676
NAEQYKDQADK		9.84774e-13	0.000276662	1	1	2	P35579	P35579 [1857-1867]		1	1309.6				69329.4	29023.3							309553		496172	760710	198045			510005	508378				8100.22	8662.61							84301.3		62713.6	129344	180870
NADLQVLKPEPELVYEDLR		5.24527e-05	0.000276662	1	1	5	P01833	P01833 [232-250]		0	2241.18	166051	196768	2.38632e+06	197584	2.75217e+06	461084	1.75891e+06	1.45701e+06	801553	2.49387e+06					713878	757049	892731		2878139	129079	36533.5	54667.2	1.51184e+06	23085	821444	59640.9	693257	462094	275859	914901					121381	691393	479570
NAAENGAIQNLIK		2.34689e-12	0.000276662	1	1	15	P11226	P11226 [167-179]		0	1355.73	2.4142e+06	1.533e+06	822566	1.56944e+06	1.00049e+06	1.66042e+06	1.75682e+06	2.81714e+06		702690			3.51147e+06	3.15595e+06	1.95713e+06	1.13496e+06	1.85552e+06	1.3484e+06	899976		531158	425908	521133	183369	298618	214775	692431	893462		257789			592803	398896	332772	1.03653e+06	996777	611025
MYYSAVDPTK	1xOxidation [M1]	3.18114e-07	0.000276662	1	1	3	P00450	P00450 [538-547]		0	1190.54	83055.2	99314.2			125224	385208	372723	1.46155e+06	225048	307850		720723		85312	76256	234071	576859	75321.4	547082	1.37685e+06	18273.3	27592.1			37375.6	49826.5	146905	463533	77451.6	112938		196276		10783	12965.9	213771	309885	34131.7
MYQMDIQQELQR	2xOxidation [M1; M4]	2.08021e-13	0.000276662	1	1	10	P04114	P04114 [2523-2534]		0	1614.73	1.73282e+06	957592	3.23913e+06	1.01566e+06	398034	480435	821534	1.21215e+06	1.69935e+06	1.20163e+06		2.48132e+06		3.48108e+06	949499	5.75008e+06	2.07594e+06		3.67404e+06	1.73824e+06	381246	266044	2.05214e+06	118666	118802	62144	323799	384437	584840	440827		675745		439990	161444	5251398	1.11518e+06
MYQMDIQQELQR	1xOxidation [M]	1.82814e-15	0.000276662	1	1	18	P04114	P04114 [2523-2534]		0	1598.73	554360	105948	7.51423e+06				246417	186242	227828	156365		6.03368e+06		1.43557e+06	289760	1.13431e+07	2.82758e+06		4.68385e+06	191087	121967	29435	4.76061e+06				97122.7	59067.1	78408.4	57363.8		1.64317e+06		181449	49268.2	1.03593e+07	1.51896e+06
MYQMDIQQELQR		2.71448e-13	0.000276662	1	1	14	P04114	P04114 [2523-2534]		0	1582.74	107472		1.73075e+06					355904	282868	304796		1.51595e+06	2.61969e+06		177689	7.18168e+06	1.25413e+06		3.2603e+06	168110	23645.4		1.09651e+06					112876	97350.6	111817		412842	442254		30212.6	6558846	673711
NADPILISLK		0.000246065	0.000276662	1	1	1	Q9ULV4	Q9ULV4 [382-391]		0	1083.64	107590	157627	88951.8	142226	218434	65776.9	325277	559026	131534			1.35941e+06		2.18313e+06	866387	240212	535520		201059	707373	23671.4	43792.9	56355	16617.3	65196.4	8508.21	128204	177296	45268.2			370211		275937	147313	219379	287678
NHLQLEGLFFTNGEHTSK		2.64994e-24	0.000276662	1	1	6	P04114	P04114 [3569-3586]		0	2072.02	290253	151171	7.6057e+06	369536				820810	689566	840981	432628			133776	416086	9.58507e+06	569150	297025	7.92334e+06	509266	63859.7	41999.1	4.81856e+06	43175.4				260322	237318	308522	16379.9			16908.6	70747.4	8.7538e+06	305744	134596
NDASHLLVFTTDAK		1.06699e-19	0.000276662	1	1	4	P05106	P05106 [266-279]		0	1531.78								742081				413838		1.80182e+06		464823	355583											235353				112702		227741		424511	191017
NDNDNIFLSPLSISTAFAMTK	1xOxidation [M19]	5.728e-09	0.000276662	1	1	1	P01008	P01008 [103-123]		0	2315.12													1.24911e+06																				210874
NHEEEMNALR		0.00124031	0.000276662	2	2	20	P02533; Q04695	P02533 [252-261]; Q04695 [221-230]		0	1242.55	4.38385e+06	3.06098e+06	2.0372e+06	7.04852e+06	4.25951e+06	7.65141e+06	3.8817e+06	2.12633e+06	1.92253e+06	960389		737365	7.50286e+06	7.14608e+06	1.94016e+06	2.23653e+06	7.43165e+06		1.04146e+06	5.52545e+06	964508	850420	1.29066e+06	823526	1.27134e+06	989706	1.52993e+06	674369	661651	352328		200808	1.26663e+06	903228	329888	2.04256e+06	3.99224e+06
NHAVLPSGGLQISR		6.95523e-06	0.000276662	1	1	3	Q96RW7	Q96RW7 [4034-4047]		0	1448.8	106497						221305	116818		247050									177097	424464	23430.8						87225.1	37049.2		90632.5
NGVAQEPVHLDSPAIK		3.33097e-12	0.000276662	1	1	8	P04217	P04217 [63-78]		0	1674.88	219007	276373		260243	562455	808354	1.13584e+06	1.13598e+06	428450	626889		1.89452e+06				188316	1.02129e+06		908720	2.54087e+06	48184.5	76783.7		30406	167877	104560	447678	360278	147453	229980		515938				171984	548633
NGNMAGISDQR		0.00116028	0.000276662	1	1	1	P05546	P05546 [421-431]		0	1162.53	55640.7				200735		88291.9	69448.3		89296.6			391570	135311	68975.8	251826		124661	44785.3	61133.6	12241.7				59913.7		34799.3	22025.7		32759.3			66104.5	17102.6	11728	229986		56489.7
NGLSLAALK		0.00125671	0.000276662	1	1	2	P16401	P16401 [58-66]		0	886.536	316948			1.19458e+06			1.19968e+06	3.56594e+06							281953		180542			437273	69732.9			139571			472841	1.13095e+06							47940.7		96986.4
NGIDIYSLTVDSR		1.55375e-16	0.000276662	1	1	16	Q14624	Q14624 [31-43]		0	1452.73	387150	1.12378e+06	1.78847e+06	274920	764562	276193	1.09212e+06	810024	1.32433e+06	363033		2.63258e+06	547678	558333	1.04903e+07	8.59031e+06	637024	349831	753463	405422	85178.4	312215	1.13308e+06	32120.8	228200	35725.4	430447	256901	455774	133182		716936	92458.5	70570.5	1.78367e+06	7845312	342206	158525
NDKSEEEQSSSSVK		5.12618e-14	0.000276662	1	1	1	P07910	P07910 [230-243]		1	1553.69																742051																				677696
NGATCVDGFNTFR	1xCarbamidomethyl [C5]	1.00412e-13	0.000276662	1	1	1	P13611	P13611 [3138-3150]		0	1458.64
NFPPSQDASGDLYTTSSQLTLPATQCLAGK	1xCarbamidomethyl [C26]	1.64734e-37	0.000276662	1	1	40	P01876	P01876 [52-81]		0	3168.52	471447	1.88352e+06	1.38304e+07	1.7287e+06	1.81315e+06	1.74445e+06	1.29048e+06	2.21055e+06	1.72632e+06	5.38434e+06		5.99322e+06		150981	2.51789e+06	3.02965e+06	683114	2.31283e+06	8.68788e+06	432035	103725	523291	8.76218e+06	201976	541173	225644	508627	701082	594124	1.97529e+06		1.63215e+06		19083.2	428119	2.76691e+06	366965	1.04805e+06
NFFNPPIISR		0.000499956	0.000276662	1	1	9	P12259	P12259 [2190-2199]		0	1204.65		454116	1.13681e+06		419604	249837	2.79359e+06	655004	1.4703e+06	1.40591e+06		910961		448398	250919	835141	649089		2.89523e+06	121873		126165	720224		125240	32316.3	1.10107e+06	207736	506011	515770		248084		56675.2	42664.1	762713	348687
NFEDVAFDEK		4.54748e-10	0.000276662	1	1	6	P07237	P07237 [376-385]		0	1213.54		512357	601944			305957		908955				979916		265369		163903	603128		137908	3.2712e+06		142346	381359			39575.4		288277				266863		33541.3		149688	323997
NEDSLVFVQTDK		1.29911e-14	0.000276662	1	1	26	P01023	P01023 [124-135]		0	1394.68	5.90203e+07	6.42899e+07	4.27993e+07	2.08039e+07	4.69213e+07	3.3195e+07	3.92246e+07	2.83547e+07	6.2212e+07	6.68929e+07		2.97968e+07	4.79825e+07	4.14493e+07	9.14344e+07	4.08842e+07	2.19501e+07	3.52691e+07	37754096	4.58347e+07	12985292	17861406	27115348	2.43066e+06	14004667	4293756	15459945	8992763	21410620	24540290		8114644	8100359	5238974	15546676	37338508	11791478	15982118
NECFLQHKDDNPNLPR	1xCarbamidomethyl [C3]	2.45727e-23	0.000276662	1	1	6	P02768	P02768 [123-138]		1	1996.93		303499	160311	241529	709372	685735	1.46287e+06	2.40497e+06	850760	1.24865e+06			467934				1.76385e+06	3.02083e+06	680760	3.07001e+06		84319.9	101564	28219.4	211727	88699.5	576576	762741	292794	458078			78996.2				947530	1.36888e+06
NDNDTFTVK		0.000113779	0.000276662	2	2	12	P21333; Q14315	P21333 [829-837]; Q14315 [824-832]		0	1053.48	65719.8	1.19944e+06	135367	413241	823065					109676	55301.4	4.67832e+06	542707		8.02664e+06	2.79464e+06	811012		2.15138e+06	4.20967e+06	14459.3	333235	85761.1	48281.8	245661					40235.7	2093.79	1.27406e+06	91619.4		1.36478e+06	2.55227e+06	435671
NFPPSQDASGDLYTTSSQLTLPATQCPDGK	1xCarbamidomethyl [C26]	1.90815e-10	0.000276662	1	1	12	P01877	P01877 [52-81]		0	3196.47	385174		881019		579478			58777.3	117547	691522	1.64776e+07	1.7592e+06			586652			104888	313860		84743.6		558166		172958			18641.4	40454.5	253691	623863	479088			99749			47529.8
QLQNIIQATSR		2.65619e-09	0.000276662	1	1	15	P15924	P15924 [271-281]		0	1271.71	4.16545e+06	2.11809e+06	831220	6.30488e+06	1.2788e+06	5.84024e+06	1.19824e+06	1.5945e+06	1.26274e+06	893787		770427	1.83935e+06	1.7021e+06	3.02958e+06		534939	1.19713e+06	296350	1.26582e+06	916457	588461	526616	736641	381686	755432	472275	505698	434578	327894		209812	310517	215137	515122		287366	542477
LLPLEEHYR		0.000694349	0.000276662	1	3	6	Q9H4M9	Q9H4M9 [33-41]		0	1169.63	193803	257210	339967	491803	184581	314318	597761	1.27892e+06	683415	280948		333866	1.17285e+06	1.11759e+06	351788	439232	487256			676213	42639.3	71459.7	215385	57460.7	55092.2	40656.9	235601	405611	235201	103069		90922.6	197999	141257	59814.8	401139	261751
LLPGPQENSVQSSACGR	1xCarbamidomethyl [C15]	0.00111385	0.000276662	1	1	2	Q76LX8	Q76LX8 [1178-1194]		0	1799.87	63384	1.21161e+06			1.8095e+06	209452	673571	357001	187305	425755		1.16185e+06					733954		290442		13945.4	336617			540084	27092.6	265481	113224	64462.2	156192		316410					394276
KFDQLLAEEK		3.42561e-12	0.000276662	3	4	7	P35580; P35579; Q7Z406	P35580 [1452-1461]; P35579 [1445-1454]; Q7Z406 [1469-1478]		1	1220.65		662556	209338	213051	196907		370508	708875	387997	205246		704453	1.3449e+06	850439		420214	218484		984367	673038		184075	132625	24892.2	58771.1		146032	224821	133531	75296.3		191845	227045	107491		383771	117368
KFICHVVGITYQHIDR	1xCarbamidomethyl [C4]	4.57934e-19	0.000276662	1	1	4	Q9UBQ5	Q9UBQ5 [140-155]		1	1986.04	7.98308e+06	1.87423e+06	2.17956e+06	971930			435199									466424	164297	138613			1.75639e+06	520708	1.38085e+06	113557			171529									425973	88259.4	62811.9
KGDTFSCMVGHEALPLAFTQK	1xCarbamidomethyl [C7]	1.02068e-16	0.000276662	1	1	16	P01876	P01876 [307-327]		1	2337.14		556177	1.02132e+07	179097	4.52582e+06		1.20831e+06	3.86808e+06	1.4348e+06	3.6657e+06		5.02175e+06		177345	1.05635e+06	7.05065e+06	3.91703e+06	3.67196e+06	2.71333e+07	177164		154520	6470549	20925.1	1.35083e+06		476244	1.22677e+06	493794	1.3448e+06		1367586		22415.5	179612	6.43918e+06	2.10421e+06	1.66394e+06
KGDTFSCMVGHEALPLAFTQK	1xCarbamidomethyl [C7]; 1xOxidation [M8]	2.30557e-37	0.000276662	1	1	21	P01876	P01876 [307-327]		1	2353.13	557803	2.55485e+06	2.07766e+07	2.66777e+06	6.29608e+06	1.12064e+06	2.36353e+06	5.96984e+06	3.57141e+06	4.49027e+06		9.22625e+06		1.52511e+06	4.54467e+06	4.66304e+06	6.76454e+06	1.89888e+06	1.77112e+07	3.60636e+06	122724	709803	1.31629e+07	311694	1.8792e+06	144954	931561	1.89335e+06	1.22912e+06	1.6473e+06		2.51261e+06		192766	772734	4.25863e+06	3.63387e+06	860475
KGEITGEVR		1.46978e-08	0.000276662	1	1	14	P21333	P21333 [1801-1809]		1	988.542	461062	1.01792e+06	384426	218740	594050	428231	1.90702e+06	1.20033e+06	426180	200032		4.90004e+06	1.93574e+07	1.18934e+07	3.60785e+06	1.40128e+06	870918		1.01494e+06	2.37889e+06	101440	282806	243552	25556.9	177307	55391.5	751633	380686	146672	73383.6		1.33444e+06	3.2679e+06	1.50326e+06	613446	1.27976e+06	467852
KGETFSCMVGHEALPLAFTQK	1xCarbamidomethyl [C7]	8.10797e-39	0.000276662	1	1	1	P01877	P01877 [294-314]		1	2351.15			38322.4					237794		418318		324489				564479		35613.4	1.56257e+06				24279					75416.8		153464		88368.9				515524		16138.1
KGETFSCMVGHEALPLAFTQK	1xCarbamidomethyl [C7]; 1xOxidation [M8]	1.99461e-13	0.000276662	1	1	2	P01877	P01877 [294-314]		1	2367.15		157907			1.33206e+06			211909	120400	841825		562380		98729.9	344687	623902			1.65704e+06	49086.6		43870.6			397581			67207.6	41436.2	308831		153154		12479	58607.5	569794
KGGETSEMYLIQPDSSVKPYR		1.37295e-19	0.000276662	1	1	6	P02675	P02675 [247-267]		1	2385.18												1.67578e+06				2.60597e+06	597864	4.08707e+07	2.69425e+06	967763												456370				2.37997e+06	321169	1.85204e+07
KGGETSEMYLIQPDSSVKPYR	1xOxidation [M8]	1.12234e-18	0.000276662	1	1	26	P02675	P02675 [247-267]		1	2401.17	801883	421838	465034	1.39148e+06	1.85715e+06	1.68481e+06	623249	1.5668e+06	292702	1.65077e+06		3.08787e+06	137294	1.02854e+06	3.04039e+06	7.21938e+06	1.48589e+06	8.51453e+07	6.35198e+06	4.022e+06	176426	117198	294620	162576	554305	217929	245647	496913	100735	605602		840927	23177.8	130002	516961	6.59328e+06	798210	3.85833e+07
KGISTSAASPAVGTVGMDMDEDDDFSK		1.25847e-05	0.000276662	1	1	1	P04114	P04114 [3995-4021]		1	2731.21																357352																				326361
KGNVATEISTER		3.40436e-16	0.000276662	1	1	26	P04114	P04114 [196-207]		1	1304.68	5.28868e+07	5.95377e+07	1.53311e+08	9.13749e+06	1.79088e+07	9.367e+06	7.69601e+07	3.65686e+07	6.84811e+07	2.99359e+07		6.29228e+07	1.04578e+08	8.55502e+07	4.59369e+07	1.08629e+08	8.77644e+07		77035640	2.82523e+07	1.16358e+07	16541102	97129540	1.06759e+06	5.34527e+06	1.21162e+06	30333003	11597803	2.35681e+07	1.09823e+07		1.71359e+07	17654700	1.08131e+07	7.8107e+06	9.92081e+07	4.71465e+07
KGNVATEISTERDLGQCDR	1xCarbamidomethyl [C17]	7.719e-12	0.000276662	1	1	2	P04114	P04114 [196-214]		2	2149.03		248658	213955				181458	130893	146840						75642	502440	366278	120451	128505	73747.1		69083.5	135550				71519.6	41513	50535.7						12861.5	458866	196763	54581.8
KGSVVTNER		1.70768e-06	0.000276662	1	1	15	Q13201	Q13201 [882-890]		1	989.537	625748	1.67099e+06	1.22548e+06	289982	1.67058e+06	426217	1.93228e+06		1.96939e+06	1.08212e+06	544736	4.32565e+06		5.44854e+06	2.0479e+06	1.74003e+06	322903	40172.7	3031758	2.10132e+06	137673	464245	776395	33880.5	498619	55131	761587		677777	396987	20624.4	1.17801e+06		688667	348207	1589122	173462	18204.2
KGTVACGEPPVVEHAR	1xCarbamidomethyl [C6]	0.000186843	0.000276662	1	1	2	P16112	P16112 [2442-2457]		1	1706.86	200027	442298	72998.6	120431	152466	360639	355668	208615	326356	228701		219556		566725			147484			2.2759e+06	44008.8	122882	46247.9	14070.8	45506.7	46648.4	140183	66162.8	112317	83901.2		59792.3		71631.1			79227.7
KGTVACGQPPVVENAK	1xCarbamidomethyl [C6]	5.00432e-25	0.000276662	1	1	12	P13611	P13611 [3291-3306]		1	1654.86	3.98785e+06	4.20086e+06	1.19904e+06	4.50457e+06	3.14019e+06	7.99192e+06	5.45011e+06	6.36672e+06	3.86821e+06	4.92002e+06		3.00347e+06	1.18236e+07	9.59611e+06	3.79247e+06	5.2831e+06	2.89458e+06	3.36421e+06	6.45513e+06	1.87366e+07	877383	1.16711e+06	759646	526299	937256	1.03375e+06	2.1481e+06	2.01922e+06	1.33127e+06	1.80496e+06		817943	1.99605e+06	1.2129e+06	644838	4824918	1.55495e+06	1.52448e+06
KGVCEETSGAYEK	1xCarbamidomethyl [C4]	1.46437e-05	0.000276662	1	1	4	P02760	P02760 [88-100]		1	1457.66	548854	626741	478861	360337	823539	709305	757700	982545	455618	651128		202361		222281	185381	268531	473201		697948	1.31059e+06	120755	174125	303380	42100.6	245803	91748.3	298640	311617	156804	238872		55109.4		28095.2	31520.4	245242	254201
KGYSPTHREEEYGK		4.04349e-09	0.000276662	1	1	1	P20930	P20930 [162-175]		2	1680.8	52305.4	271735	285929	754203	1.03739e+06	1.12242e+06	379959	419851	482025	151295				976550	460478	117157	293534		199106	525324	11507.9	75495.1	181149	88118.7	309632	145184	149757	133157	165891	55504.2				123431	78295.5	106996	157685
KLNQALLDLHALGSAR		1.48582e-06	0.000276662	1	1	3	P02792	P02792 [106-121]		1	1719.99			32156.4													782689	103258		82676				20372.5													714810	55469.7
KIISDYHQQFR		2.38556e-15	0.000276662	1	1	26	P04114	P04114 [4486-4496]		1	1434.75	1.38309e+07	8.96306e+06	4.90897e+07	4.41127e+06	7.14771e+06	525972	9.70217e+06	1.52162e+07	2.80212e+07	1.71469e+07		4.48441e+06	3.59035e+07	2.93104e+07	2.48994e+06	5.96381e+07	3.59024e+07	1.15894e+07	5.9361e+07	1.2807e+07	3.043e+06	2.49017e+06	3.11006e+07	515399	2.13339e+06	68034.2	3.82401e+06	4.82587e+06	9.64365e+06	6290486		1.22125e+06	6.0612e+06	3.70468e+06	423368	5.4466e+07	19286556	5.25168e+06
KLFDYCDIPLCASSSFDCGKPQVEPK	3xCarbamidomethyl [C6; C11; C18]	2.10167e-38	0.000276662	1	1	12	P08519	P08519 [4297-4322]		1	3061.41		87623.1	1.26002e+07	186940	647575		1.38516e+06	2.01631e+06	541512	539132		1.83822e+06				2.93833e+06	518885	656792	5.30833e+06	62281.2		24344	7.98279e+06	21841.5	193282		545946	639477	186364	197786		500606				2.6835e+06	278742	297624
KLEVNEAELLR		2.81561e-12	0.000276662	1	1	14	Q6NZI2	Q6NZI2 [137-147]		1	1313.74	659937	734985	378474	1.71267e+06	924878	795604	743028	803439	961704	907807							441496	341816	390437	1.03551e+06	145195	204198	239781	200103	276050	102911	292857	254812	330976	333037							237169	154893
KLECNGENDCGDNSDERDCGR	3xCarbamidomethyl [C4; C10; C19]	5.02742e-13	0.000276662	1	1	1	P13671	P13671 [155-175]		2	2499.95					102035	47685.5	36202.9	77245.8		70122.7		171336							680084	108803					30454.4	6168.1	14269	24498.7		25725.2		46660.2
KLECNGENDCGDNSDER	2xCarbamidomethyl [C4; C10]	8.10708e-21	0.000276662	1	1	4	P13671	P13671 [155-171]		1	2011.77	47764.6	69365.9		78168.2	189965	108897	108743	125931		99585.4		207508		39510.5				143379	696089		10508.9	19271.6		9132.91	56699	14085.8	42859.8	39939.4		36533.9		56511.2		4993.92				64971.6
KESYSVYVYK		1.08622e-12	0.000276662	1	9	4	Q5QNW6	Q5QNW6 [35-44]		1	1265.64	80419.5	306323		326742	100823		651075	7.71964e+06	293321	92429.5	617521	288091		1.05813e+06	238709	1.04238e+06	496022		833369	135724	17693.4	85104.6		38175.5	30092.7		256614	2448302	100948	33908.6	23380.2	78456.6		133742	40587.8	951976	266460
KICLDLQAPLYK	1xCarbamidomethyl [C3]	2.37639e-22	0.000276662	1	1	34	P02776	P02776 [81-92]		1	1461.81	1.66289e+07	1.91077e+07	7.80328e+06	4.91261e+06	4.7484e+07	8.33328e+07	5.1113e+07	6.47714e+07	1.1631e+08	4.15443e+07		1.18899e+08		3.1363e+07	1.89906e+08	5.37652e+07	4.50871e+07	4.62551e+07	2.1323e+07	6.77266e+07	3.6586e+06	5.30862e+06	4.94374e+06	573974	1.41726e+07	1.07791e+07	2.01457e+07	2.05424e+07	4.00288e+07	1.52409e+07		3.23801e+07		3.96412e+06	3.229e+07	4.91023e+07	2.42205e+07	2.09604e+07
KKPTENIIIDLDKEDK		3.2751e-07	0.000276662	1	1	2	P13611	P13611 [2537-2552]		2	1899.04		102617			176252		188990	232646		166218				214569		136689	100090	889811	272878	337377		28509.7			52606.3		74488.5	73784.2		60978.6				27120.5		124835	53767.6	403215
KHVAEAICK	1xCarbamidomethyl [C8]	6.48941e-11	0.000276662	1	1	24	P04114	P04114 [254-262]		1	1055.57	2.64237e+07	2.31999e+07	6.21979e+07	5.11836e+06	1.28392e+07	3.88274e+06	3.71402e+07	1.74265e+07	3.66238e+07	2.34058e+07		3.74716e+07	3.94397e+07	3.34343e+07	2.59653e+07	7.27492e+07	4.84769e+07	7.62255e+06	4.62031e+07	2.52416e+07	5.81358e+06	6.44552e+06	3.94052e+07	598013	3.83214e+06	502230	1.46384e+07	5.52686e+06	1.26043e+07	8.58665e+06		1.02047e+07	6.65817e+06	4.22592e+06	4.41491e+06	6.644e+07	2.60415e+07	3.45414e+06
KHPDASVNFSEFSK		3.52864e-05	0.000276662	1	1	9	P09429	P09429 [30-43]		1	1592.77	496353	608028		1.96673e+06	708371	1.39558e+06	1.0431e+06	2.71306e+06	890961	1.746e+06		702687	267189	935895	967090	407983	450524	441719	334123	1.56248e+06	109205	168926		229787	211428	180518	411127	860453	306629	640535		191364	45106.5	118292	164435	372601	242019	200164
KHLEINPDHPIVETLR		9.47708e-07	0.000276662	1	1	1	P08238	P08238 [624-639]		1	1911.04																193079																				176334
KHEAFESDLAAHQDR		1.83958e-11	0.000276662	1	3	2	P12814	P12814 [436-450]		1	1753.83		52657.3				507862	277308	61111.6	204890		77069.2	350078	243267	889510	419716	177743	411376	6.14619e+06	698605	530593		14629.5				65691.7	109298	19381.7	70514.1		2917.95	95337.4	41068.2	112430	71364.7	162328	220989	2.78513e+06
KGYTQQLAFR		3.10567e-12	0.000276662	1	1	8	P01024	P01024 [1051-1060]		1	1211.65	269616	231843	467655	984878	529422	303819	1.08825e+06	1.63018e+06	1.53002e+06	1.62669e+06		886507		1.02078e+06	1.41278e+06	2.17847e+06	887395	848606	3.86511e+06	1.25024e+06	59319.3	64412.1	296281	115070	158017	39298.8	428921	517015	526566	596767		241424		129021	240217	1.98954e+06	476704	384544
KKVIVIPVGIGPHANLK		1.29193e-06	0.000276662	1	1	1	P04275	P04275 [1407-1423]		2	1783.13								257481	236494	339522						565106			274446									81660.6	81390.6	124557						516097
KESYSIYVYK		0.000202353	0.000276662	1	7	2	Q16778	Q16778 [35-44]		1	1279.66	113816							1.3771e+06								452671			277481		25041.1							436750								413413
KEPAVLELEGK		0.000143348	0.000276662	1	1	4	Q01518	Q01518 [317-327]		1	1212.68	347150	355621	750196		171508	228682	388857	1.13707e+06	378948	218270		552211		893830	460021	217145	446214		220458	798874	76377.9	98800.7	475284		51190.1	29579.9	153264	360624	130417	80074.6		150385		112976	78217.9	198313	239703
KEEYGHNEVVEYDCNPNFIINGPK	1xCarbamidomethyl [C14]	1.70587e-10	0.000276662	1	1	2	Q9BXR6	Q9BXR6 [224-247]		1	2865.31															272524	543389																			46337.5	496263
KALAAGGYDVEK		2.37531e-07	0.000276662	1	1	1	P16401	P16401 [67-78]		1	1221.65				202789				491139																23693.2				155766
KAFDICPLVK	1xCarbamidomethyl [C6]	1.93506e-10	0.000276662	1	1	2	P01031	P01031 [1154-1163]		1	1190.66																175317			820263																	160112
KAEEEHLGILGPQLHADVGDK		3.19658e-25	0.000276662	1	1	11	P00450	P00450 [799-819]		1	2256.16			336379		510814		1.55949e+06	7.22156e+06	1.11353e+06	1.53129e+06		2.25849e+06				1.3192e+06	2.45241e+06	4.1048e+06	4.60976e+06	1.18771e+06			213111		152463		614657	2.29033e+06	383227	561768		615059				1.20479e+06	1.31742e+06	1.86008e+06
KADTNAPTDIDSPK		1.00861e-07	0.000276662	1	1	5	Q9UQP3	Q9UQP3 [611-624]		1	1472.72	1.29709e+06	184743	568233	772095	923755	1.0392e+06	519138	349685	158766	192289		266792		396172		525799	204542	427169	170128	867011	285378	51326.4	360002	90209.1	275715	134420	204613	110903	54640.1	70543		72656		50074.2		480199	109879	193570
KADTNALTEIDSPANLVTDR		1.5168e-09	0.000276662	1	1	3	Q9UQP3	Q9UQP3 [522-541]		1	2144.08	819791		718432	606348	1.12693e+06	1.08943e+06	517471	510133	171900			645320		165363	337404	752357	156242	234378	248156	575928	180366		455160	70843.7	336356	140917	203956	161790	59160.4			175741		20901	57369.1	687109	83932.4	106208
KADGSYAAWLSR		3.1741e-16	0.000276662	2	2	19	P0C0L4; P0C0L5	P0C0L4 [1061-1072]; P0C0L5 [1061-1072]		1	1324.66	368708	561284	968793	930792	454006	269100	1.01732e+06	2.93891e+06	1.96271e+06	2.43919e+06		438262	889601	423926	802165	3.38569e+06	3.01381e+06	2.54371e+06	5.1544e+06	953167	81121	155939	613775	108751	135508	34808	400967	932083	675478	894841		119353	150182	53582.1	136393	3.09207e+06	1.619e+06	1.15267e+06
KAMAVEDIISR		3.69952e-05	0.000276662	1	1	2	P07357	P07357 [412-422]		1	1232.67																		194199	762460																			88000.9
KACADATLSQITNNIDPVGR	1xCarbamidomethyl [C3]	5.43853e-12	0.000276662	1	1	4	P62873	P62873 [23-42]		1	2144.08	819791		718432	606348	1.12693e+06	1.08943e+06	517471	1.27411e+06	171900			645320		165363	337404	986435	327366	234378	248156	575928	180366		455160	70843.7	336356	140917	203956	404085	59160.4			175741		20901	57369.1	900886	175859	106208
HYQINQQWER		7.63573e-10	0.000276662	1	1	11	P02751	P02751 [58-67]		0	1401.67	591069	1.21053e+06	475596	415507	1.12472e+06	169483	1.08009e+06	1.50633e+06	1.37444e+06	1.65008e+06			1.04262e+06	537888	600951	1.6072e+06	546226	1.30228e+06	871744	1.12735e+06	130043	336317	301312	48546.5	335697	21922.6	425707	477737	473023	605346			176015	67986.2	102180	1.46782e+06	293430	590126
HYQEEGQGTEVVQGVLLGLVVEDR		5.46875e-31	0.000276662	1	1	1	O15372	O15372 [52-75]		0	2654.34
HYEGSTVPEKK		1.5599e-09	0.000276662	1	1	8	P00738	P00738 [312-322]		1	1274.64	349929	1.93005e+06	4.10926e+06	2.0639e+07	1.10516e+07	8.81144e+06		6.29075e+06	4.48682e+06	4.80501e+06		9.59465e+06	256861		6.83785e+07	6.80511e+06	6.08172e+06	4.72296e+06	1.50014e+07	1.66397e+07	76989.3	536218	2.60341e+06	2.41139e+06	3.29857e+06	1.13976e+06		1.99513e+06	1.54416e+06	1.76276e+06		2.61293e+06	43363		1.16265e+07	6.21494e+06	3.26707e+06	2.1402e+06
HYEGSTVPEK		4.85109e-09	0.000276662	1	1	21	P00738	P00738 [312-321]		0	1146.54	2.82082e+06	1.99357e+07	4.10118e+07	7.64575e+07	5.53762e+07	3.38715e+07	1.86155e+07	2.49847e+07	1.56143e+07	2.07666e+07		8.77851e+07	3.14894e+07	3.42428e+07	3.67229e+08	3.97635e+07	3.03808e+07	5.656e+07	1.2887e+08	4.25977e+07	620619	5.53864e+06	2.59829e+07	8.93305e+06	1.65282e+07	4.38125e+06	7.33711e+06	7.92395e+06	5.37374e+06	7.61841e+06		2.39067e+07	5.31602e+06	4.32812e+06	6.24404e+07	3.6315e+07	16320423	2.563e+07
HYDGSYSTFGER		9.31116e-13	0.000276662	1	1	30	P01023	P01023 [1020-1031]		0	1418.6	3.49997e+06	5.15589e+06	4.46638e+06	1.4946e+06	4.78426e+06	1.8669e+06	3.78954e+06	2.60982e+06	4.69371e+06	4.88176e+06		2.60269e+06	1.2482e+06	4.30969e+06	5.20278e+06	3.88096e+06	1.82011e+06	2.46315e+06	3.18197e+06	4.14505e+06	770043	1.43244e+06	2.82966e+06	174624	1.42797e+06	241483	1.49361e+06	827712	1.61537e+06	1.79092e+06		708796	210720	544723	884634	3.54439e+06	977752	1.11617e+06
HVLTLTDQVTR		5.07101e-08	0.000276662	1	1	16	P05106	P05106 [218-228]		0	1282.71	473352	2.34302e+06	1.75402e+06	202892	1.48879e+06	861413	2.4645e+06	4.91323e+06	1.82799e+06	1.50683e+06		4.30956e+06	8.50369e+06	7.48809e+06	1.85769e+06	2.81509e+06	2.41031e+06	1.1754e+06	1.85041e+06	2.68611e+06	104144	650953	1.11125e+06	23705.2	444361	111423	971356	1.55824e+06	629113	552796		1.17363e+06	1.43558e+06	946456	315864	2570946	1.2948e+06	532630
KAADDTWEPFASGK		2.28807e-05	0.000276662	1	1	5	P02766	P02766 [55-68]		1	1522.72	133441	221319	244395	191213		419442	940363	1.3616e+06	312613	707251		800780	279584				571887	137047	200209	910510	29358.9	61488.1	154835	22340.7		54254.6	370634	431834	107587	259462		218078	47199				307214	62102.3
KIQCVDGEWTTLPTCVEQVK	2xCarbamidomethyl [C4; C15]	1.75574e-06	0.000276662	1	1	3	Q9BXR6	Q9BXR6 [248-267]		1	2391.17							316461					232744	152528			556475			482312								124730					63383.7	25749.7			508214
KAMAVEDIISR	1xOxidation [M3]	2.40248e-05	0.000276662	1	1	2	P07357	P07357 [412-422]		1	1248.66									174108										393123	299791									59920.1
KASYLDCIR	1xCarbamidomethyl [C7]	0.00166786	0.000276662	1	1	7	P02787	P02787 [61-69]		1	1125.57	305444	334756	260661	344265	952798	1.64625e+06	1.77575e+06	4.47076e+06	845028	1.81801e+06					784660	208573	1.0997e+06	2.21913e+06	929767	3.51037e+06	67201.9	93003.9	165141	40222.8	284383	212942	699894	1.41791e+06	290821	666954					133417	190484	590755	1.00559e+06
KDVLETFTVK		1.67558e-17	0.000276662	1	1	14	P21926	P21926 [170-179]		1	1179.66	2.74781e+06	2.26766e+06	2.29276e+06			1.04206e+06			4.77208e+06	4.09703e+06		9.6421e+06	2.43946e+07	2.76582e+07	2.16389e+06	3.49453e+06	2.0264e+06	958497	3518688	1.06392e+07	604557	630014	1.45257e+06			134790			1.64234e+06	1.50303e+06		2.62586e+06	4.11827e+06	3.49586e+06	367928	3191462	1.08857e+06	434340
KDVDGAYMTK	1xOxidation [M8]	1.09904e-09	0.000276662	1	1	4	P04264	P04264 [289-298]		1	1143.54	1.22403e+06	856234	367153	3.9485e+06	790307	2.97138e+06	1.1446e+06	392803	910510	455362	798800		5.65945e+06	2.62759e+06	1.15172e+06	131445	650092	315639	251832	849350	269304	237884	232608	461330	235884	384347	451132	124578	313357	167054	30243.7		955424	332115	195827	120045	349226	143031
KDVDGAYMTK		4.7021e-11	0.000276662	1	1	2	P04264	P04264 [289-298]		1	1127.54	1.31895e+06	792160	408914	2.68496e+06	885432	3.38033e+06	904889	609161	831260	489393	386734		3.45404e+06	2.46398e+06	1.0148e+06	346340	970382	114750	455624	1.17484e+06	290188	220082	259066	313702	264276	437245	356653	193197	286083	179539	14642.3		583107	311435	172547	316304	521284	51998.6
KDTVIKPLLVEPEGLEK		1.1954e-09	0.000276662	1	1	11	P01023	P01023 [896-912]		1	1908.11	5.10987e+06	8.08998e+06	8.3585e+06	1.208e+06	9.51105e+06	4.039e+06	5.68084e+06	4.50214e+06	8.5844e+06	1.21711e+07		4.6402e+06	489976	5.18316e+06	9.56624e+06	6.50723e+06	3.7579e+06	3.57401e+06	4.35538e+06	6.09338e+06	1.12424e+06	2.24761e+06	5.29549e+06	141139	2.83878e+06	522442	2239045	1.42787e+06	2.95437e+06	4.46508e+06		1.26368e+06	82717.3	655125	1.62656e+06	5.94289e+06	2.01873e+06	1.61955e+06
KDSGFQMNQLR		4.6742e-05	0.000276662	1	1	7	P02787	P02787 [122-132]		1	1323.65	170956	173848	94539.8	144674	1.57093e+06	1.82168e+06	1.80041e+06	6.61524e+06	735153	2.15727e+06		1.51312e+06		146366	903614	284242	1.68723e+06	629922	2.66804e+06	4.75916e+06	37612.8	48299.6	59895.3	16903.3	468879	235633	709612	2.09804e+06	253007	791413		412071		18500	153642	259591	906373	285448
KDSGEDPATCAFQR	1xCarbamidomethyl [C10]	3.79912e-13	0.000276662	1	1	6	Q13103	Q13103 [94-107]		1	1581.7		126623					94798.6	114309	89299	67543.3						7.14593e+06	357489	50019.6	130926	212690		35179.1					37363.9	36253.5	30732.7	24778.9						6.5262e+06	192041	22666.2
KAQQELEEQTR		0.000413027	0.000276662	1	1	8	P26038	P26038 [360-370]		1	1359.69	748865	1.56517e+06	585587	572958	861645	2.3092e+06	1.3768e+06	2.07465e+06	3.04468e+06	843002		740975		1.02325e+06	777589	646901	1.0368e+06	181965	283651	2.28515e+06	164761	434844	370996	66942.5	257176	298693	542653	657979	1.04784e+06	309263		201792		129333	132214	590799	556965	82457.1
KDLYANTVLSGGTTMYPGIADR	1xOxidation [M15]	2.44592e-07	0.000276662	1	2	3	P60709	P60709 [291-312]		1	2359.16								346577				991063			627602	432038			325863									109918				269898			106712	394569
KDLQNFLK		0.000104453	0.000276662	1	1	7	P06702	P06702 [43-50]		1	1005.57	1.70984e+06	1.4478e+06	1.18352e+06	2.05114e+06	2.1487e+06	6.41983e+06	3.69705e+06	4.8306e+06	2.28872e+06	5.87432e+06			4.36541e+06		1.25847e+06	1.30504e+06	2.40625e+06	4.61338e+06	1.87904e+06	5.11745e+06	376189	402235	749811	239649	641326	830401	1.45715e+06	1.53204e+06	787675	2155051			736964		213980	1.19186e+06	1292626	2.09054e+06
KDEILGIANNR		0.000210517	0.000276662	1	1	5	Q86UX7	Q86UX7 [567-577]		1	1242.68	59132.6	399179	414120		119984	149465	432640	316167	200372	91486.6		500260			358092	369247	385301		180892	284726	13010	110902	262364		35811.9	19333.2	170521	100273	68959.1	33562.7		136237			60886.7	337224	206982
KCSYTEDAQCIDGTIEVPK	2xCarbamidomethyl [C2; C10]	2.40248e-05	0.000276662	1	1	2	P02749	P02749 [306-324]		1	2214.01
KCSTSSLLEACTFR	2xCarbamidomethyl [C2; C11]	1.49444e-14	0.000276662	1	1	22	P02787	P02787 [683-696]		1	1659.78	741442	751395	453514	914394	3.06198e+06	5.23351e+06	3.68127e+06	1.00382e+07	1.62546e+06	4.77472e+06		5.556e+06			2.74061e+06	623386	2.85969e+06	5.37503e+06	3.1639e+06	9.42396e+06	163128	208757	287322	106835	913914	676952	1.45094e+06	3.18362e+06	559412	1.75165e+06		1.51308e+06			465989	569323	1.53621e+06	2.43568e+06
KCDPTEVELDNQIVTATQSNICDEDSATETCYTYDR	3xCarbamidomethyl [C2; C22; C31]	8.15141e-22	0.000276662	1	1	3	P01591	P01591 [93-128]		1	4241.81			1.59928e+06		1.04437e+06			453190				1.89315e+06				1.11456e+06			845307				1.01322e+06		311713			143730				515567				1.0179e+06
KATTVTGTPCQEWAAQEPHR	1xCarbamidomethyl [C10]	1.23505e-15	0.000276662	1	1	5	P08519	P08519 [4240-4259]		1	2268.08			610593				208203	310783	149585			321983				253556	357065		255395				386839				82061	98565.5	51480.3			87686.4				231566	191813
KDLYANTVLSGGTTMYPGIADR		8.70467e-07	0.000276662	1	2	4	P60709	P60709 [291-312]		1	2343.16							152228	202458				612963				693810			335140								59999.2	64210				166930				633639
KITAIITQGCK	1xCarbamidomethyl [C10]	0.000118713	0.000276662	1	1	3	P12259	P12259 [2132-2142]		1	1232.7		383269	254667			44652.7	1.16957e+06	199085	564675	476075		316857		76204.5	109096	158741			609867	177142		106482	161343			5775.8	460972	63140.3	194336	174653		86290.3		9631.86	18549.7	144974
KITEVALMGHLSCDTK	1xCarbamidomethyl [C13]	2.91856e-34	0.000276662	1	1	27	P04114	P04114 [1100-1115]		1	1802.91	1.26833e+06	1.99607e+06	9.18904e+06		1.7419e+06		5.90749e+06	4.5395e+06	5.39779e+06	3.48072e+06		9.51934e+06	1.70193e+06	2.48809e+06	1.50431e+06	3.1925e+07	7.7877e+06	1.8461e+06	1.7093e+07	1.18876e+06	279049	554561	5.82168e+06		519907		2.32837e+06	1.43971e+06	1.85768e+06	1.27693e+06		2.59242e+06	287319	314482	255779	2.91563e+07	4.18351e+06	836557
KITEVALMGHLSCDTK	1xCarbamidomethyl [C13]; 1xOxidation [M8]	3.03894e-26	0.000276662	1	1	10	P04114	P04114 [1100-1115]		1	1818.91	829373	1.77793e+06	9.99914e+06	1.08255e+06	917519		4.52569e+06	2.85127e+06	4.64174e+06	2.80295e+06		2.42497e+06	1.19974e+06	1.20998e+06	1.40518e+06	1.09315e+07	6.05629e+06		5.91651e+06	1.82514e+06	182474	493956	6.33492e+06	126482	273853		1.78375e+06	904286	1.59748e+06	1.02829e+06		660398	202538	152935	238924	9.98346e+06	3.25341e+06
KVPQVSTPTLVEVSR		1.64329e-16	0.000276662	1	1	79	P02768	P02768 [438-452]		1	1639.94	2.24202e+08	2.69692e+08	1.44126e+08	2.50308e+08	4.33881e+08	6.51565e+08	7.56108e+08	8.34305e+08	4.1508e+08	8.082e+08		7.62033e+08	3.28444e+08	1.80678e+08	1.37544e+08	8.45673e+07	6.73488e+08	9.54451e+08	3.00125e+08	1.35005e+09	4.93276e+07	7.49275e+07	9.13102e+07	2.92452e+07	1.29501e+08	8.42796e+07	2.98012e+08	2.64602e+08	1.42852e+08	2.96496e+08		2.07526e+08	5.54477e+07	2.28368e+07	2.33867e+07	7.72332e+07	3.61794e+08	4.32507e+08
KVPLDSSPATCHNNIMK	1xCarbamidomethyl [C11]; 1xOxidation [M16]	1.30174e-08	0.000276662	1	1	14	P04275	P04275 [1036-1052]		1	1927.94	1.57782e+07	1.85375e+07	8.03685e+06	6.65244e+06	2.35823e+07	2.82133e+07	1.97579e+07	2.57804e+07	2.81736e+07	3.08582e+07		2.59051e+07		3.15556e+07	2.63035e+07	4.55795e+07	1.65852e+07	6.34898e+06	4.63514e+07	3.38298e+07	3.47143e+06	5.15021e+06	5.09172e+06	777249	7.03865e+06	3.64937e+06	7.78738e+06	8.17632e+06	9.69611e+06	1.13206e+07		7.0548e+06		3.98846e+06	4.47241e+06	4.16266e+07	8.90947e+06	2.87703e+06
KVPLDSSPATCHNNIMK	1xCarbamidomethyl [C11]	1.61541e-18	0.000276662	1	1	20	P04275	P04275 [1036-1052]		1	1911.94	1.85923e+07	2.00802e+07	8.83864e+06	8.54284e+06	3.35837e+07	1.79019e+07	2.94058e+07	3.35482e+07	2.86518e+07	4.09945e+07	1.44666e+06	2.45463e+07	3.81004e+07	1.85129e+07	1.22142e+07	9.68886e+07	2.51061e+07	1.31739e+08	7.63302e+07	3.0075e+07	4.09057e+06	5.57881e+06	5.59968e+06	998118	1.00238e+07	2.3156e+06	1.159e+07	1.06399e+07	9.86067e+06	1.50392e+07	54772.6	6.68476e+06	6.43207e+06	2.33994e+06	2.07678e+06	8.84859e+07	1.34869e+07	5.96971e+07
KVIVIPVGIGPHANLK		1.08042e-29	0.000276662	1	1	42	P04275	P04275 [1408-1423]		1	1655.04	8.67284e+06	2.23173e+07	1.79309e+07	1.59928e+06	3.58835e+07	1.632e+07	2.7498e+07	3.17573e+07	6.09519e+07	8.0062e+07		2.48738e+07	1.38054e+07	1.72252e+07	1.57377e+07	9.93983e+07	3.08043e+07	7.02278e+07	7.43196e+07	1.90832e+07	1.90815e+06	6.20033e+06	1.13601e+07	186854	1.07102e+07	2.11098e+06	1.0838e+07	1.00719e+07	2.09769e+07	2.93715e+07		6.77393e+06	2.33062e+06	2.17718e+06	2.67589e+06	9.07779e+07	1.65479e+07	3.18235e+07
KVLLDGVQNPR		2.12594e-05	0.000276662	1	1	17	P01024	P01024 [305-315]		1	1238.72	718100	954343	1.16028e+06	2.50997e+06	1.22802e+06	1.16572e+06	2.41973e+06	1.34029e+06	1.62132e+06	1.68717e+06		2.3815e+06		885257	1.22272e+06	2.23878e+06	1.73156e+06	877289	2.30972e+06	1.35642e+06	157992	265141	735093	293257	366528	150786	953710	425075	557985	618955		648560		111892	207900	2.04462e+06	930187	397541
KVLGAFSDGLAHLDNLK		1.13113e-22	0.000276662	2	2	5	P02042; P68871	P02042 [67-83]; P68871 [67-83]		1	1797.99	14303.9		2.19528e+06		119743		3.34763e+06	745030	366327	137211						3.83234e+06	911638		6.07541e+06	99043.5	3147.06		1.39081e+06		35740		1.31943e+06	236288	126073	50337.1						3.49998e+06	489727
KVTEENKELANELR		3.4849e-10	0.000276662	1	1	9	P07996	P07996 [300-313]		2	1672.89	440647	2.23909e+06	983326	75735.5	1.21779e+06	322778	1.43231e+06	559092	970878	937316	1.1113e+06	2.71665e+06		1.57628e+06	1.66219e+06	935824	915530	505518	2.02483e+06	1.35997e+06	96948.5	622078	622982	8848.69	363475	41751.2	564532	177317	334133	343863	42075.5	739831		199234	282623	854664	491818	229074
KVFLDCCNYITELR	2xCarbamidomethyl [C6; C7]	8.23416e-11	0.000276662	1	1	7	P01024	P01024 [722-735]		1	1830.89			485735		266945		1.46672e+06	2.64377e+06	684982	1.11027e+06		2.1502e+06				609893	1.32964e+06	475269	1.14989e+06				307736		79675.6		578093	838479	235740	407314		585570				557000	714273	215367
KVEAEVQAIQEQVSSQGSR		2.34509e-17	0.000276662	1	1	4	Q9NT22	Q9NT22 [625-643]		1	2073.06	1.87676e+06	2.58905e+06								822360											412914	719304								301691
KVADALTNAVAHVDDMPNALSALSDLHAHK		1.56744e-51	0.000276662	1	1	2	P69905	P69905 [62-91]		1	3124.58
KTVTAMDVVYALK	1xOxidation [M6]	8.05697e-25	0.000276662	1	1	5	P62805	P62805 [80-92]		1	1454.79				883662				1.67366e+07				1.97585e+06				673473	1.08873e+06		629506	348126				103244				5.30806e+06				538088				615066	584860
KTVTAMDVVYALK		7.76926e-07	0.000276662	1	1	2	P62805	P62805 [80-92]		1	1438.8								3.58691e+06	59682.9				48511.2			690286	331474		574397									1.1376e+06	20540.2				8189.62			630421	178066
KTTDTASVQNEAK		3.40182e-21	0.000276662	1	1	1	Q9ULV4	Q9ULV4 [428-440]		1	1392.7
KTTCNPCPLGYKEENNTGECCGR	4xCarbamidomethyl [C4; C7; C20; C21]	6.44898e-15	0.000276662	1	1	5	P04275	P04275 [2621-2643]		2	2745.15	1.50865e+06	2.40594e+06	1.26535e+06	696788	4.56712e+06	3.08689e+06	2.27666e+06	2.54062e+06	2.45521e+06	2.93892e+06		2.07532e+06	3.32753e+06	2.29612e+06	2.12338e+06	4.13564e+06	1.80031e+06	8.99538e+06	4312694	3.97021e+06	331923	668431	801660	81410.5	1.36315e+06	399287	897320	805763	844974	1.07817e+06		565177	561751	290218	361040	3.77698e+06	967115	4076233
KVESELIKPINPR		8.42235e-10	0.000276662	1	1	7	P07225	P07225 [433-445]		1	1522.9	5.8974e+06	7.70686e+06	9.75965e+06	6.58218e+06	8.961e+06	5.38921e+06	6.39744e+06	9.22469e+06	7.2881e+06	7.9115e+06				1.20784e+07	1.04521e+07	8.24417e+06	6.85781e+06	6.64551e+06	7.49488e+06	4.21028e+06	1.29751e+06	2141166	6183184	769040	2.6746e+06	697091	2521484	2.92563e+06	2.50824e+06	2.90241e+06				1.52665e+06	1.77718e+06	7.52919e+06	3.68398e+06	3.01139e+06
KTTCNPCPLGYK	2xCarbamidomethyl [C4; C7]	1.80002e-25	0.000276662	1	1	26	P04275	P04275 [2621-2632]		1	1438.68	4.11659e+06	3.93613e+06	1.67861e+06	1.27141e+06	7.62858e+06	6.68154e+06	5.16838e+06	6.64666e+06	7.93127e+06	1.05223e+07		3.53213e+06	3.85936e+06	8.16875e+06	5.60319e+06	1.35445e+07	3.12228e+06	2.77937e+07	5.96941e+06	9.99232e+06	905707	1.09356e+06	1.06348e+06	148548	2.27691e+06	864254	2.03706e+06	2.108e+06	2.72959e+06	3.86022e+06		961913	651534	1.03249e+06	952716	1.23699e+07	1.67727e+06	1.25946e+07
KYEDEINKR		4.9306e-12	0.000276662	1	3	24	P35908	P35908 [267-275]		2	1194.61	6.12786e+07	4.09176e+07	2.74819e+07	1.81218e+08	2.72937e+07	9.39497e+07	3.80879e+07	2.058e+07	3.08802e+07	1.31036e+07		1.52372e+07	1.73687e+08	1.34455e+08	3.68374e+07	8.91569e+06	1.95797e+07	542293	2.32234e+07	2.97471e+07	1.34822e+07	1.1368e+07	1.74111e+07	2.11729e+07	8.14639e+06	1.21523e+07	1.50119e+07	6.527e+06	1.06276e+07	4.8072e+06		4.14957e+06	2.93218e+07	1.69944e+07	6.2635e+06	8.14248e+06	1.05181e+07	245739
KYTHLSCDK	1xCarbamidomethyl [C7]	1.39245e-05	0.000276662	1	1	6	P05156	P05156 [37-45]		1	1151.55	245488	51935.1		336824		1.04386e+06		859770		398105		300934	170714		1.23989e+06		690866	1.27574e+06	1.75814e+06	1.39931e+06	54010.8	14428.9		39353.5		135023		272678		146048		81954.1	28819.7		210819		371129	578097
LADGPHGCAGR	1xCarbamidomethyl [C8]	8.3052e-10	0.000276662	1	1	33	A1L4H1	A1L4H1 [22-32]; [306-316]		0	1110.51	2.23472e+07	2.76876e+07	3.07299e+07	5.08083e+07	1.86043e+07	5.96897e+07	2.8655e+07	4.73421e+07	2.03977e+07	2.09633e+07	4.44205e+06	5.16669e+07	3.13453e+07	2.02609e+07	5.75599e+07	1.60293e+07	2.78497e+07	5.3166e+07	3.22156e+07	4.24361e+07	4.9167e+06	7.69233e+06	1.94688e+07	5.93628e+06	5.55285e+06	7.72084e+06	1.12941e+07	1.50147e+07	7.01997e+06	7.6906e+06	168182	1.40706e+07	5.29169e+06	2.56087e+06	9.78696e+06	1.46392e+07	1.49607e+07	2.4092e+07
LADGPGHCK	1xCarbamidomethyl [C8]	1.46437e-05	0.000276662	1	1	14	O43866	O43866 [140-148]		0	954.446	2.12607e+08	1.14063e+08	8.58587e+07	2.35331e+08	2.89906e+08	1.4529e+08	7.36595e+07	1.14225e+08	9.31158e+07	1.50073e+08	1.59332e+08	1.48047e+08	2.59471e+08	2.53667e+08	1.82848e+08	6.04313e+07	1.17748e+08	6.37076e+07	9.34525e+07	8.14136e+07	46776440	3.16897e+07	5.43954e+07	2.74953e+07	8.65288e+07	1.87932e+07	2.90321e+07	36226664	3.20463e+07	55055584	6.03251e+06	4.03179e+07	43803684	3.20622e+07	3.10898e+07	5.51903e+07	63253616	28868908
LADGGATNQGR		1.90215e-12	0.000276662	1	1	24	Q08380	Q08380 [26-36]		0	1059.52	3.05533e+07	2.65154e+07	6.02508e+07	9.85307e+07	3.60206e+07	3.38175e+07	2.67852e+07	5.26236e+07	5.21616e+07	3.75605e+07	1.02568e+08	2.97423e+07	5.95898e+07	6.92261e+07	9.86904e+07	5.87784e+07	3.04639e+07	6.36255e+07	4.25728e+07	3.02895e+07	6.72215e+06	7.36665e+06	3.81716e+07	1.1512e+07	1.07511e+07	4.37427e+06	1.05571e+07	1.66897e+07	1.79517e+07	1.37794e+07	3.88337e+06	8.0998e+06	10059898	8.74982e+06	1.67804e+07	5.36808e+07	16365012	2.88317e+07
IADFELPTIIVPEQTIEIPSIK		8.97675e-14	0.000276662	1	1	3	P04114	P04114 [3847-3868]		0	2466.37
LADFALLCLDGK	1xCarbamidomethyl [C8]	3.41238e-19	0.000276662	1	1	8	P02788	P02788 [587-598]		0	1335.7	5.95722e+06	5.71886e+06	8.08239e+06	1.01731e+07	1.79784e+07	3.54796e+07	1.0032e+07	1.01247e+07	1.44966e+07	1.60798e+07		2.46884e+07	47323.8	6.34464e+06	2.55332e+07		1.62983e+06	390269	100183	2.27095e+06	1.31067e+06	1.58885e+06	5120564	1.1886e+06	5366029	4.58926e+06	3.954e+06	3.21107e+06	4.98909e+06	5.89901e+06		6723457	7989.16	801931	4341429		875535	176849
LADDVDLEQVANETHGHVGADLAALCSEAALQAIR	1xCarbamidomethyl [C26]	7.06936e-19	0.000276662	1	1	2	P55072	P55072 [390-424]		0	3672.79													4.39244e+06																				741528
KYSDASDCHGEDSQAFCEK	2xCarbamidomethyl [C8; C17]	2.7507e-18	0.000276662	1	1	7	P01023	P01023 [271-289]		1	2233.88	5.43845e+06	8.92547e+06	6.97414e+06	2.19323e+06	6.5366e+06	3.02257e+06	4.35749e+06	3.48964e+06	4.83873e+06	6.66803e+06		4.12869e+06	5.15712e+06	4.66485e+06	9.45418e+06	3.78592e+06	2.48326e+06		5.10416e+06	5.03261e+06	1.19653e+06	2.47973e+06	4418437	256249	1.95099e+06	390968	1.71746e+06	1.10675e+06	1.66528e+06	2446228		1124375	870621	589614	1.6075e+06	3.45759e+06	1.33399e+06
IACVLPVLMDGIQSHPQKPFYTVGEK	1xCarbamidomethyl [C3]	3.40983e-24	0.000276662	1	1	1	P10643	P10643 [629-654]		0	2927.52
LAAYLMLMR		1.05382e-09	0.000276662	1	1	3	P04114	P04114 [559-567]		0	1081.59	35388.6	88765.3	661052		72907.8		393314	330987	85527.9	67600.8		1.11992e+06	380253		72089.1	3.59713e+06	37433.4		1.36085e+06		7785.98	24661.3	418807		21760.9		155020	104973	29434.9	24800		304990	64193.9		12257.4	3.28517e+06	20109
LAALNPESNTAGLDIFAK		5.48538e-11	0.000276662	1	1	4	O00299	O00299 [96-113]		0	1844.98			197582			87948.2	214861			109013				79789.6		375098			170456	87199.9			125177			11376	84685.2			39992.6				10085		342568
LAAIAESGVER		8.43516e-08	0.000276662	1	1	16	P28072	P28072 [210-220]		0	1115.61	1.0976e+06	3.04866e+06	821719	2.70076e+06	833525	1.48557e+06	1.00773e+06	421721	622757	355009		1.03887e+06	1.36599e+06	1.00026e+06	695625		419851	1.30132e+06	627850	401741	241488	846995	520596	315548	248783	192158	397187	133750	214325	130238		282917	230605	126427	118278		225541	589690
LAACSVSCGR	2xCarbamidomethyl [C4; C8]	4.78361e-09	0.000276662	1	1	8	Q76LX8	Q76LX8 [959-968]		0	1080.49		331952			513128		200923	127061		137691		317078	2.21734e+07				287364			145754		92224.8			153154		79191.8	40297.6		50513.3		86350.5	3.74329e+06				154370
LAAADGAVAGEVR		9.04707e-18	0.000276662	1	1	17	Q8NI99	Q8NI99 [82-94]		0	1199.64	1.43864e+06	1.37866e+06	1.52955e+06	1.15986e+06	1.98872e+06	1.03721e+06	918620	1.40136e+06	930774	941770		585048	1.24397e+06	652933	247963	525088	248538	1.29158e+06	414215	491177	316521	383028	969038	135515	593577	134162	362064	444444	320331	345497		159327	210006	82527.4	42161.3	479549	133513	585274
KYTYNYEAESSSGVPGTADSR		3.00373e-29	0.000276662	1	1	10	P04114	P04114 [51-71]		1	2282.02	3.95806e+07	4.82921e+07	9.06358e+07	7.34081e+06	1.32661e+07	4.71173e+06	4.58781e+07	2.29164e+07	4.39819e+07	2.11281e+07		4.23503e+07	1.29436e+06	3.24132e+07	1.97338e+07	7.95684e+07	5.67275e+07		44317548	2.03438e+07	8.70828e+06	13416804	57421956	857676	3.95956e+06	609460	1.80824e+07	7.268e+06	15136597	7.75104e+06		11533352	218513	4.09686e+06	3.35536e+06	7.26678e+07	3.04737e+07
LAAYLMLMR	1xOxidation [M]	5.22823e-09	0.000276662	1	1	6	P04114	P04114 [559-567]		0	1097.58	222811	272740	2.65379e+06		106553		1.53924e+06	1.03155e+06	448840	135905		1.9618e+06			362116	7.64626e+06	117588		2.21781e+06	94665.9	49021.5	75774.3	1.6813e+06		31803		606677	327160	154471	49858.1		534261			61570.9	6.98314e+06	63167.6
HVFWGSGSHTLPALLENLK		0.000913283	0.000276662	1	1	1	P02786	P02786 [699-717]		0	2106.11								131993											187939									41861.8
KTQEQLALEMAELTAR	1xOxidation [M10]	0.000246065	0.000276662	1	1	1	P26038	P26038 [412-427]		1	1847.95
KTLLSNLEEAK		9.27529e-20	0.000276662	1	1	26	P10909	P10909 [68-78]		1	1245.7	1.30467e+07	1.76384e+07	1.37332e+07	5.65583e+06	1.2659e+07	7.58956e+06	1.54951e+07	2.42793e+07	2.06368e+07	1.76078e+07		1.53081e+07	2.72748e+06	5.60216e+06	2.00367e+07	1.66965e+07	2.38279e+07	1.72686e+07	15386371	2.33084e+07	2.87046e+06	4.9004e+06	8700627	660809	3778337	981705	6107217	7.70025e+06	7.10228e+06	6.45958e+06		4.1689e+06	460450	708084	3.40686e+06	1.52485e+07	1.28002e+07	7.82523e+06
KPDVSHGEMVSGFGPIYNYK		1.48077e-38	0.000276662	1	1	30	P04003	P04003 [241-260]		0	2225.07	3.74099e+06	6.47332e+06	1.214e+07	4.65327e+06	1.63957e+07	4.13199e+06	9.60034e+06	3.07561e+07	1.11715e+07	1.62823e+07		1.41375e+07	4.53796e+06	4.93456e+06	1.32976e+07	1.65536e+07	9.49953e+06	8.53133e+06	1.78777e+07	3.34989e+06	823069	1.79846e+06	7.69124e+06	543673	4.89365e+06	534471	3.78387e+06	9.75438e+06	3.84473e+06	5973324		3.85011e+06	766095	623703	2.261e+06	1.5118e+07	5.1031e+06	3865948
KPDGYDYYAFSK		6.27603e-10	0.000276662	1	1	6	Q92954	Q92954 [1361-1372]		0	1453.66		259813	570592	375274		209943	292818	776124	368240	274598		697318			792339	572275		809223	641998	95862.9		72182.8	361496	43845.8		27156.1	115411	246149	126732	100739		189902			134722	522644		366697
KNTPIDGK		0.00109864	0.000276662	1	1	2	P07358	P07358 [540-547]		1	872.484							156450	127317	107990	141318		292692			256761	234009	104063		1.11731e+06	167044							61663.1	40378.9	37165.4	51843.9		79709.5			43657.3	213715	55901.9
KNHEEEMKDLR		3.66268e-14	0.000276662	1	1	2	P13645	P13645 [285-295]		2	1428.69			188942		220576		374444	360415	252259	132439					429365	143810	483691		770561	498527			119704		65835.6		147583	114306	86816.4	48586.5					73005.4	131338	259836
KNEFQGELEK		2.58281e-09	0.000276662	1	1	2	Q8NBJ4	Q8NBJ4 [67-76]		1	1221.61	4.62214e+06	1.27244e+07	1.23196e+06	643113		1.64737e+07			1.20848e+06						1.31205e+06		680700			91464.2	1.01694e+06	3.53518e+06	780505	75139.2		2.13086e+06			415904						223089		365668
KMTVTDQVNCPK	1xCarbamidomethyl [C10]; 1xOxidation [M2]	1.14882e-12	0.000276662	1	1	9	P05090	P05090 [176-187]		1	1436.69	2.29387e+06	5.25861e+06	1.73274e+06	1.18274e+06	633609	1.58379e+06	3.77254e+06	1.11791e+07	2.16753e+06	2.94725e+06		1.68674e+07	3.07109e+06	1.99644e+06	3.24091e+06	5.21888e+06	1.49161e+07	63888.9	3.45767e+06	9.61186e+06	504682	1.46098e+06	1.09777e+06	138188	189114	204862	1.48691e+06	3.54548e+06	745969	1.08123e+06		4.59353e+06	518458	252340	551054	4.76627e+06	8.01287e+06	28951.1
KPDVSHGEMVSGFGPIYNYK	1xOxidation [M9]	8.45594e-39	0.000276662	1	1	64	P04003	P04003 [241-260]		0	2241.06	2.94183e+07	3.80285e+07	3.46133e+07	3.07229e+07	4.52701e+07	3.23894e+07	3.31015e+07	1.07441e+08	3.88714e+07	5.12729e+07		1.16718e+08	3.07453e+07	3.29072e+07	8.48573e+07	3.39885e+07	2.71576e+07	2.2932e+07	4.04849e+07	2.39254e+07	6.47243e+06	1.05653e+07	2.19291e+07	3.58957e+06	1.35118e+07	4.18955e+06	1.30466e+07	3.40752e+07	1.33778e+07	1.88099e+07		3.17861e+07	5190389	4.1593e+06	1.44284e+07	3.10408e+07	1.45889e+07	1.03916e+07
KMTVTDQVNCPK	1xCarbamidomethyl [C10]	1.74618e-22	0.000276662	1	1	20	P05090	P05090 [176-187]		1	1420.69	2.49917e+06	6.67409e+06	1.97197e+06	1.53587e+06	1.8121e+06	1.55643e+06	5.61479e+06	1.61091e+07	2.64252e+06	3.72608e+06		1.90652e+07	1.75916e+06	1.55235e+06	1.60073e+06	1.00368e+07	2.13803e+07	147691	1.21289e+07	1.05642e+07	549852	1.85424e+06	1.24933e+06	179446	540860	201324	2.21301e+06	5.10905e+06	909437	1.36695e+06		5.19206e+06	296980	196209	272173	9.16633e+06	11485367	66925.9
KMLEEIMK		0.00112919	0.000276662	1	1	2	P02679	P02679 [114-121]		1	1021.54				80930				196649								2.77483e+06	318084	1.87181e+07	1391463	177322				9455.59				62367.6								2.53418e+06	170873	8482048
KMGLAFESTK	1xOxidation [M2]	1.20189e-10	0.000276662	1	1	14	P04114	P04114 [305-314]		1	1127.58	2.20302e+06	2.49844e+06	3.82202e+06	874406	882754	2.12611e+06	2.464e+06	1.79436e+06	3.14264e+06	1.92592e+06		3.40124e+06	1.98723e+06	4.3366e+06	5.31882e+06	7.31212e+06	5.16183e+06		3.52985e+06	3.10085e+06	484694	694132	2.42143e+06	102163	263477	275011	971159	569085	1.08156e+06	706543		926268	335483	548124	904363	6.67797e+06	2.77291e+06
KLYDYCDVPQCAAPSFDCGKPQVEPK	3xCarbamidomethyl [C6; C11; C18]	1.1705e-18	0.000276662	1	1	3	P00747	P00747 [550-575]		1	3072.39									221901								600091	1.36118e+06	831362										76368.6								322366	616814
KLVPFATELHER		2.5567e-20	0.000276662	1	1	11	P06727	P06727 [79-90]		1	1439.8		640653	1.29706e+06	216844	736698		1.04695e+06	3.25329e+06	1.74373e+06	1.02475e+06					183828	636233	1.3326e+06	261364	3.57518e+06	1.93398e+06		177990	821746	25335.4	219883		412643	1.03179e+06	600114	375941					31256.5	581055	715866	118436
KLTISEQNIQR		3.08981e-07	0.000276662	1	1	27	P04114	P04114 [334-344]		1	1329.75	7.52307e+07	8.17737e+07	1.9547e+08	1.00629e+07	2.71023e+07	1.12237e+07	1.0884e+08	6.11038e+07	1.20798e+08	6.62415e+07		8.69755e+07		1.03289e+08	5.42454e+07	2.12666e+08	1.29281e+08	2.40495e+07	8.17477e+07	3.94416e+07	1.65518e+07	2.27188e+07	1.23839e+08	1.17572e+06	8.08927e+06	1.45178e+06	4.28981e+07	1.93792e+07	4.15734e+07	2.43013e+07		2.36862e+07		13055165	9.2234e+06	1.94222e+08	6.94489e+07	1.0898e+07
KITEVALMGHLSCDTKEER	1xCarbamidomethyl [C13]	4.9306e-12	0.000276662	1	1	1	P04114	P04114 [1100-1118]		2	2217.1	103964		136060	131567	288418	75133.1	116916	127299		215364	403063		480359		311135	365956	321348		320316	273890	22873.6		86200.1	15371.8	86084.7	9718.43	46081.4	40373.3		79008.2	15260.5		81093.8		52902.7	334218	172626
KMTSNFPVDLSDYPK		1.70587e-10	0.000276662	1	1	7	P04114	P04114 [1188-1202]		1	1741.85	1.27501e+06	1.44552e+06	4.68842e+06		758634		2.06657e+06	2.4515e+06	2.68135e+06	1.69864e+06		4.25932e+06		1.15313e+06	1.24532e+06	1.0374e+07	5.61082e+06		6612880	1.04934e+06	280521	401602	2970330		226430		814517	777500	922800	623160		1.15995e+06		145749	211743	9474332	3014099
KTLQALEFHTVPFQLLAR		1.31438e-11	0.000276662	1	1	1	Q08380	Q08380 [376-393]		1	2112.2
KPIWLSQMSCSGR	1xCarbamidomethyl [C10]	2.4249e-18	0.000276662	1	1	21	O43866	O43866 [199-211]		0	1549.76	1.72847e+06	1.61467e+06	2.02653e+06	1.65475e+06	6.9339e+06		1.48174e+06	3.57615e+06	1.49821e+06	4.27445e+06		1.22574e+06	964755		297360	2.88515e+06	2.55116e+06	954171	7.32911e+06		380288	448596	1.2839e+06	193336	2.06957e+06		584010	1.13418e+06	515616	1.56812e+06		333808	162869		50560.4	2.63493e+06	1.37047e+06	432380
KPVAFSDYIHPVCLPDR	1xCarbamidomethyl [C13]	3.54251e-31	0.000276662	1	1	14	P00734	P00734 [470-486]		0	2014.02		513560	2.14089e+06		1.07136e+06		1.95748e+06	2.48219e+06	1.61589e+06	2.73017e+06		447336		116820	703517	7.45182e+06	2.33554e+06	91238.2	4.74035e+06			142680	1.35635e+06		319771		771518	787232	556117	1.00159e+06		121824		14765.5	119620	6.80556e+06	1.25464e+06	41344.4
KTEAPAAPAAQETK		2.23279e-05	0.000276662	1	1	8	P80723	P80723 [150-163]		1	1412.74	953899	855113	446414	2.86891e+06	778688	6.84769e+06	831921	3.24887e+06	1.10847e+06	1.06788e+06		2.1392e+06	872895	770032	2.0754e+06	638085	2.08352e+06	2.78925e+06	469845	1.54181e+06	209871	237572	282824	335194	232416	885746	327893	1.03039e+06	381487	391763		582574	147361	97328.1	352882	582747	1.11925e+06	1.26394e+06
KSSTPEEVK		2.77848e-05	0.000276662	1	1	5	P23528	P23528 [22-30]		1	1004.53	779082	1.67707e+06		1.13707e+06	1.35598e+06	2.04038e+06	2.96379e+06	2.79247e+06	2.8712e+06	607720	8.69233e+06	4.15621e+06		1.15495e+07	4.45041e+06	707573	1.30773e+06		602825	4.09382e+06	171409	465932		132851	404722	263921	1.16815e+06	885638	988139	222948	329104	1.13187e+06		1.45979e+06	756708	646208	702507
KSPQELLCGASLISDR	1xCarbamidomethyl [C8]	2.74013e-25	0.000276662	1	1	14	P00734	P00734 [384-399]		1	1773.92	773405	3.08941e+06	2.63958e+06	862589	1.33322e+06	1.22752e+06	2.49629e+06	4.33292e+06	2.56168e+06	3.54717e+06		6.32621e+06	1.38322e+06	1.17144e+06	3.82487e+06	6.6986e+06	3.19256e+06	2.62092e+06	4.10497e+06	3.26621e+06	170160	858319	1.67229e+06	100782	397928	158779	983887	1.37419e+06	881615	1.30131e+06		1.72283e+06	233513	148065	650347	6.11766e+06	1.71502e+06	1.18766e+06
KSISAALEHK		6.6322e-15	0.000276662	1	1	7	P04114	P04114 [1958-1967]		1	1083.62	2.495e+07	2.73734e+07	5.42877e+07	5.56237e+06	1.19038e+07	3.1755e+06	2.32927e+07	1.97139e+07	3.83482e+07	1.9372e+07			5.67819e+07	4.06562e+07	2.15619e+07	1.09446e+08	6.87482e+07		4.782e+07	2.59695e+07	5.48935e+06	7.60503e+06	3.43937e+07	649889	3.55294e+06	410749	9.18055e+06	6.25229e+06	1.31977e+07	7.10678e+06			9585874	5.13874e+06	3.66619e+06	9.99542e+07	3.69311e+07
KSASDLTWDNLK		5.87947e-05	0.000276662	1	1	5	P02787	P02787 [453-464]		1	1377.7	207244	181704	151213		716882	1.43021e+06	1.52807e+06	4.30809e+06	822247	1.96351e+06		721900			392624	237311	1.32898e+06	70606	1.16987e+06	2.13922e+06	45596.5	50482	95800.4		213969	184997	602272	1.36632e+06	282981	720332		196597			66758.2	216730	713921	31994.9
KREEAPSLRPAPPPISGGGYR		5.20396e-07	0.000276662	1	1	6	P02675	P02675 [52-72]		2	2235.2	252949		102390	1.05166e+06	691594	621055	315723	503871	247938	191504	108130	703068		423487	1.00093e+06	2.01871e+06	745305	6.92033e+06	1.17044e+06	2.11657e+06	55652.3		64868.8	122873	206421	80333.2	124439	159804	85329.3	70255	4093.95	191468		53526.7	170188	1843636	400374	3.13593e+06
KPIWLSQMSCSGR	1xCarbamidomethyl [C10]; 1xOxidation [M8]	2.86124e-08	0.000276662	1	1	12	O43866	O43866 [199-211]		0	1565.76	4.36287e+06	3.09059e+06	2.76554e+06	8.49929e+06	1.28695e+07	2.20433e+06	3.82814e+06	6.03357e+06	3.37695e+06	6.60575e+06		195694	3.00487e+06	3.30566e+06	3.23909e+06	3.56452e+06	4.79384e+06		4.91355e+06	4.53626e+06	959892	858646	1.75209e+06	993030	3.84118e+06	285129	1.50882e+06	1.91356e+06	1.1622e+06	2.42338e+06		53293.8	507279	417819	550746	3.25538e+06	2.57522e+06
KQTALVELVK		1.24566e-14	0.000276662	1	1	30	P02768	P02768 [549-558]		1	1128.7	2.19745e+07	3.2232e+07	1.07874e+07	2.05868e+07	5.85516e+07	7.60287e+07	1.18023e+08	1.30949e+08	5.49932e+07	8.99306e+07	77659.7	5.78038e+07	2.00222e+07	1.70485e+07	9.54096e+06	1.39476e+07	9.47574e+07	1.57608e+07	28511618	1.95817e+08	4.8347e+06	8.9549e+06	6.83432e+06	2.40529e+06	17475972	9.83427e+06	46517504	4.15308e+07	1.89262e+07	3.29919e+07	2940.3	1.57418e+07	3.38012e+06	2.15485e+06	1.62226e+06	12737967	5.09031e+07	7.14197e+06
KQLVEIEK		0.00111385	0.000276662	2	2	9	P00739; P00738	P00739 [170-177]; P00738 [228-235]		1	986.588	1.3173e+06	1.88477e+06	2.504e+06	7.01283e+06	4.35671e+06	2.46392e+06	1.37436e+06	2.07579e+06	1.23904e+06	2.47399e+06		1.09346e+07	5.52302e+06		4.8096e+07	6.86827e+06	3.44859e+06	5.8439e+06	9586616	2.8983e+06	289824	523638	1.5864e+06	819356	1.30035e+06	318707	541690	658342	426422	907607		2977849	932392		8.17781e+06	6272619	1.85256e+06	2.64815e+06
KQISNLQQSISDAEQR		9.73352e-16	0.000276662	1	1	13	P04264	P04264 [417-432]		1	1844.95	1.06791e+07	8.01173e+06	4.03499e+06	2.25569e+07	6.81951e+06	2.16232e+07	7.03743e+06	4.83224e+06	9.66308e+06	4.46143e+06		2.58305e+06	2.1225e+07	2.08834e+07	6.78635e+06	2.19661e+06	5.62522e+06	5.04161e+06	3.36766e+06	6.11629e+06	2.34955e+06	2.22587e+06	2.55635e+06	2.63548e+06	2.03543e+06	2.79695e+06	2.77373e+06	1.53255e+06	3.3256e+06	1.63672e+06		703448	3583186	2639553	1153889	2.00611e+06	3.02184e+06	2.28459e+06
KQELSEAEQATR		2.3017e-11	0.000276662	1	1	20	P01024	P01024 [428-439]		1	1389.7	3.51871e+06	3.93779e+06	4.25379e+06	9.74036e+06	3.35744e+06	5.15465e+06	8.19222e+06	4.38459e+06	5.23245e+06	5.38852e+06		6.87897e+06	5.33938e+06	3.99307e+06	4.86931e+06	9.76086e+06	8.39131e+06	1.02806e+07	7.74759e+06	5.77088e+06	774165	1.09402e+06	2694968	1.13803e+06	1.0021e+06	666751	3.22888e+06	1.39058e+06	1.80078e+06	1.97683e+06		1.87337e+06	901389	504704	827932	8.91435e+06	4.50777e+06	4.65861e+06
KQCANLQNAIADAEQR	1xCarbamidomethyl [C3]	1.74486e-09	0.000276662	1	1	3	P13647	P13647 [405-420]		1	1829.89	346499	240290	258438	515628		923136	240719	44649.5	183654	80425.9			1.02542e+06	479678			140815		173929	67633.3	76234.7	66758.7	163732	60244.3		119407	94876.7	14160.7	63205.4	29505			173111	60628.9			75645.1
KPVEEYANCHLAR	1xCarbamidomethyl [C9]	8.11404e-34	0.000276662	1	1	31	P02787	P02787 [588-600]		0	1586.77	5.15858e+06	4.74781e+06	2.76951e+06	1.19142e+07	2.45353e+07	4.69909e+07	4.79908e+07	6.77967e+07	1.04141e+07	3.55464e+07		1.40731e+07	7.58707e+07	4.06311e+06	2.74452e+07	2.8302e+06	2.9761e+07	7.7049e+07	2.63257e+07	6.99699e+07	1.13496e+06	1.31907e+06	1.75461e+06	1.39202e+06	7.32308e+06	6.07824e+06	1.89151e+07	2.15019e+07	3.58406e+06	1.30405e+07		3.83255e+06	1.28084e+07	513556	4.66653e+06	2.58475e+06	1.59874e+07	3.49146e+07
KPVDEYKDCHLAQVPSHTVVAR	1xCarbamidomethyl [C9]	1.33831e-40	0.000276662	1	1	19	P02787	P02787 [252-273]		1	2549.29	311270	1.65168e+06	1.65644e+06	2.52974e+06	7.02349e+06	9.13279e+06	1.48069e+07	2.70675e+07	8.27856e+06	1.56968e+07		6.54539e+06		2.01914e+06	7.49469e+06	4.30882e+06	1.52094e+07	2.76458e+07	1.88583e+07	2.89238e+07	68483.6	458880	1.04943e+06	295567	2.09631e+06	1.18132e+06	5.836e+06	8.58451e+06	2.84911e+06	5.75852e+06		1.78252e+06		255209	1.27433e+06	3.93513e+06	8.17038e+06	12527610
KQSEPLEITLLAPER		3.18114e-07	0.000276662	1	1	7	P24821	P24821 [1659-1673]		1	1723.96	532272	621269	426196	1.52601e+06	716945	676710	439880	1.77909e+06	663880	539546		899220	505352	826924	1.45386e+06	495170	991521		500298	1.00147e+06	117107	172605	270015	178294	213987	87532.1	173374	564243	228478	197938		244887	85313.1	104519	247202	452226	532640
HVAEAICKEQHLFLPFSYK	1xCarbamidomethyl [C7]	9.49936e-06	0.000276662	1	1	1	P04114	P04114 [255-273]		1	2317.18																255666			103266																	233493
HVAAGTQQPYTDGVR		5.11435e-11	0.000276662	1	1	6	P14923	P14923 [541-555]		0	1599.79	1.95841e+06	1.11547e+06	318473	5.12141e+06	589499	4.10063e+06	726049	656334	535913	453946		203472	1.34126e+06	1.16324e+06	1.40736e+06	145565	281155	326469		831402	430878	309906	201767	598368	175949	530414	286165	208158	184438	166534		55412	226431	147028	239294	132940	151035	147939
HTSVQTTSSGSGPFTDVR		8.92123e-18	0.000276662	1	1	15	P02751	P02751 [273-290]		0	1863.88	2.69516e+06	3.21211e+06	1.57891e+06	3.2516e+06	3.89962e+06	4.43709e+06	3.18725e+06	3.15892e+06	3.58509e+06	4.50751e+06		2.05602e+06		2.72828e+06	3.56032e+06	2.96683e+06	1.19956e+06	1.00379e+07	1.65085e+06	4.83666e+06	592973	892408	1.00031e+06	379906	1.16393e+06	573935	1.25622e+06	1.00186e+06	1.23383e+06	1.65362e+06		559920		344841	605364	2.70953e+06	644395	4.54863e+06
GVVDSDDLPLNVSR		0.000581364	0.000276662	1	1	2	P14625	P14625 [435-448]		0	1485.75																180447	118091																			164798	63437.7
GVTSVSQIFHSPDLAIR		8.18719e-08	0.000276662	1	1	2	P05155	P05155 [217-233]		0	1826.98			408173	47461.9	451206	190832	584048	865518	514836	796728		1.25463e+06			648414	2.0647e+06	718697		1.39601e+06	64246.4			258596	5545.3	134672	24684	230196	274501	177184	292287		341677			110250	1.88564e+06	386080
GVTFNVTTVDTK		2.78521e-10	0.000276662	1	1	5	O00299	O00299 [38-49]		0	1281.67		570902										1.09228e+06								548104		158611										297464
GVNVCQETCTK	2xCarbamidomethyl [C5; C9]	1.26429e-09	0.000276662	1	1	5	P03952	P03952 [314-324]		0	1295.57	634603	1.20677e+06	1.37399e+06	255951	638311	294883	1.85499e+06	864235	1.50004e+06	361169		3.93354e+06	934053	851288	1.29808e+07	4.22294e+06	1.48814e+06		714149	991008	139621	335272	870485	29904.5	190517	38143	731124	274094	516247	132498		1.07123e+06	157686	107598	2.20713e+06	3.8567e+06	799422
GVLQGHLESSR		5.05628e-07	0.000276662	1	1	4	P07359	P07359 [506-516]		0	1182.62	195027		142569		330516		310588	416252	191897	133937			1.34391e+06	1.0644e+06		530852			601422	681694	42908.7		90323.8		98649.7		122415	132015	66042.3	49136.1			226878	134535		484813
GVGWSHPLPQCEIVK	1xCarbamidomethyl [C11]	7.24227e-26	0.000276662	1	1	29	P04003	P04003 [160-174]		0	1706.87	4.53616e+06	6.286e+06	5.16124e+06	3.42064e+06	5.69948e+06	3.50372e+06	5.03976e+06	1.29643e+07	6.33855e+06	8.6809e+06		7.38512e+06	4.86843e+06	4.34352e+06	6.91259e+06	6.45752e+06	3.9339e+06	5.09144e+06	5.7398e+06	2.9861e+06	998019	1.74641e+06	3.26988e+06	399656	1.70113e+06	453205	1.98637e+06	4111650	2.18145e+06	3.18467e+06		2.01121e+06	821885	548998	1.17535e+06	5.89749e+06	2113268	2.30717e+06
GVVDSEDLPLNISR		8.36958e-14	0.000276662	2	3	7	P07900; P08238	P07900 [387-400]; P08238 [379-392]		0	1513.79	330543		252613				170967		428949			815684				2.60512e+06	767689		428751	300811	72724.1		160042				67384.7		147625			222137				2.37919e+06	412398
GVGGAPPTVTLLR		3.47124e-07	0.000276662	1	1	5	Q07954	Q07954 [771-783]		0	1237.73	717338	990153	599310	668503	691492	684477	727999	508000	1.10078e+06	549303		879924		1.09053e+06	1.58558e+06	919394	600519		591337	1.72535e+06	157824	275090	379690	78105.8	206390	88536.8	286933	161114	378838	201517		239632		137838	269598	839659	322595
GVALHRPDVYLLPPAR		5.87929e-34	0.000276662	1	1	145	P01871	P01871 [323-338]		0	1774.01	4.39538e+07	8.67746e+07	3.75463e+08	7.5868e+07	4.76284e+08	3.99077e+07	2.10275e+08	1.99992e+08	2.25644e+08	3.36191e+08		5.50246e+07	6.30015e+07	7.23935e+07	7.586e+07	3.63253e+08	4.08095e+08	1.97782e+08	4.59121e+08	4.37549e+07	9.67044e+06	2.41082e+07	2.37873e+08	8.86417e+06	1.42157e+08	5.16203e+06	8.28779e+07	6.34278e+07	7.76565e+07	1.23335e+08		1.4985e+07	1.06359e+07	9.15017e+06	1.28985e+07	3.3175e+08	2.19226e+08	8.96244e+07
GVAEQQQQQGCGDPEVMQK	1xCarbamidomethyl [C11]	7.45917e-16	0.000276662	1	1	5	Q13201	Q13201 [305-323]		0	2116.94	1.33951e+06	1.82222e+06	4.19482e+06	1.21243e+06	1.65471e+06	1.02671e+06	2.51208e+06	702187	1.285e+06	1.19482e+06	102650	2.1837e+06		2.33592e+06	1.83808e+06	1.94698e+06	720572	692864	3.1428e+06	2.46385e+06	294712	506258	2.65761e+06	141656	493884	132804	990112	222700	442241	438331	3886.48	594692		295249	312530	1.77813e+06	387087	313969
GTYSTTVTGR		1.80511e-06	0.000276662	1	1	63	P08519	P08519 [38-47]; [152-161]; [266-275]; [380-389]; [494-503]; [608-617]; [722-731]; [836-845]; [950-959]; [1064-1073]; [1178-1187]; [1292-1301]; [1406-1415]; [1520-1529]; [1634-1643]; [1748-1757]; [1862-1871]; [1976-1985]; [2090-2099]; [2204-2213]; [2318-2327]; [2432-2441]; [2546-2555]; [2660-2669]; [2774-2783]; [2888-2897]; [3002-3011]; [3116-3125]; [3230-3239]; [3344-3353]; [3572-3581]		0	1042.52	5.60432e+08	7.89282e+08	1.09476e+09	1.16404e+08	3.46338e+08	4.87563e+08	8.21573e+08	6.03547e+08	4.86853e+08	3.24837e+08	3.34999e+06	8.17427e+08	2.28838e+09	1.72468e+09	7.84519e+08	3.62884e+08	7.11211e+08	2.11937e+06	6.30097e+08	2.63527e+08	1.23303e+08	2.19283e+08	6.93584e+08	1.36003e+07	1.03372e+08	6.3066e+07	3.23814e+08	1.91416e+08	1.67553e+08	1.19169e+08	126835	2.22612e+08	3.86322e+08	2.17991e+08	1.33393e+08	3.31413e+08	3.82059e+08	960389
GTVIIIANHGDR		5.48103e-16	0.000276662	1	1	6	Q16851	Q16851 [474-485]		0	1265.7		116182	1.65642e+06	89260.6		129331				395134		376793	731517	645478	430913	1.6421e+06	506730	62895	70508.5	301069		32278.4	1.04942e+06	10428.9		16728.9				144959		102613	123494	81585.2	73268.5	1.49969e+06	272213	28500.7
GTVEPQLEAR		3.7878e-05	0.000276662	1	1	7	P21333	P21333 [428-437]		0	1099.57	498838	691364	414639	134784	606507	497950	1.78633e+06	940108	489453	332925	4.58319e+06	3.09283e+06	1.35573e+07	9.69178e+06	3.96181e+06	3.50763e+06	1.23994e+06		2.94235e+06	2.84424e+06	109751	192079	262693	15747.8	181025	64409.6	704064	298157	168448	122137	173526	842278	2288733	1224991	673630	3.20343e+06	666088
GTVACGQPPVVENAK	1xCarbamidomethyl [C5]	2.56658e-13	0.000276662	1	1	10	P13611	P13611 [3292-3306]		0	1526.76	5.56287e+06	5.59953e+06	1.56057e+06	4.80606e+06	4.22053e+06	9.38576e+06	6.36368e+06	7.41242e+06	4.83182e+06	6.82744e+06		5.04632e+06	1.52507e+07	1.03055e+07	5.59425e+06	6.51674e+06	3.05707e+06	2.58007e+07	7.65506e+06	2.03286e+07	1.22391e+06	1.55569e+06	988690	561525	1.25971e+06	1.21404e+06	2.50818e+06	2.35087e+06	1.6629e+06	2.50471e+06		1.37428e+06	2574603	1.30257e+06	951195	5.95157e+06	1.64224e+06	11691496
GVCEETSGAYEK	1xCarbamidomethyl [C3]	9.18165e-13	0.000276662	1	1	8	P02760	P02760 [89-100]		0	1329.56	1.15126e+06	1.12274e+06	1.38466e+06	749275	1.33685e+06	1.18995e+06	1.3667e+06	2.01328e+06	1.18336e+06	1.68536e+06		1.62052e+06	694329	567248	514601	556384	1.34488e+06	4.91129e+06	1.63503e+06	3.36749e+06	253293	311925	877246	87542.8	399012	153919	538671	638517	407258	618288		441319	117216	71697.3	87498	508132	722464	2.22554e+06
GTVACGEPPVVEHAR	1xCarbamidomethyl [C5]	8.63429e-12	0.000276662	1	1	16	P16112	P16112 [2443-2457]		0	1578.77	2.44327e+06	3.86488e+06	848762	1.25144e+06	1.49815e+06	4.40549e+06	2.94471e+06	1.97268e+06	2.88711e+06	2.01159e+06		1.73855e+06	4.15277e+06	3.6391e+06	899708	443273	1.46623e+06	8.04121e+06	889137	1.96217e+07	537552	1.07376e+06	537730	146214	447154	569848	1.16063e+06	625641	993615	737971		473464	701066	459964	152978	404830	787648	3.64385e+06
GVVQELQQAISK		1.70164e-05	0.000276662	1	1	2	P29692	P29692 [96-107]		0	1299.73			111812													507960	190360		82155.7				70837.8													463907	102260
GVWGSVCDDNWGEKEDQVVCK	2xCarbamidomethyl [C7; C20]	1.41756e-30	0.000276662	1	1	15	O43866	O43866 [263-283]		1	2467.07	4.98388e+06	7.41662e+06	1.64001e+07	1.79052e+06	3.80862e+07	4.86565e+06	6.72464e+06	1.81073e+07	8.05893e+06	1.80858e+07		1.4368e+07	4.04698e+06	1.22106e+06	6.48084e+06	1.33588e+07	1.02952e+07	8.35207e+06	21363954	889046	1.09652e+06	2.06053e+06	10390237	209198	11367641	629369	2650445	5742762	2773527	6634935		3.91287e+06	683207	154335	1101944	12200214	5.53051e+06	3.78472e+06
HDGIPAECTTIYNR	1xCarbamidomethyl [C8]	0.000303195	0.000276662	1	1	3	Q9Y5C1	Q9Y5C1 [239-252]		0	1646.76	85880.3	84426.3			207316	69217				98892.6		52489.2		142036	91625.8	184718	462977	656670		846107	18894.9	23455.8			61878	8953.19				36279.7		14294.5		17952.7	15579.2	168699	248709	297568
HCLVTVEK	1xCarbamidomethyl [C2]	6.36456e-10	0.000276662	1	1	10	P07225	P07225 [474-481]		0	985.514	1.88029e+07	2.3817e+07	3.32854e+07	2.26174e+07	2.61104e+07	2.07312e+07	1.89352e+07	2.66099e+07	2.30367e+07	2.10275e+07		2.23142e+07	2.64204e+07	2.3268e+07	4.87489e+07	1.95138e+07	2.19691e+07	164770	19634164	1.38151e+07	4136893	6616973	21087810	2.64255e+06	7793216	2.68157e+06	7.46312e+06	8439387	7.92821e+06	7.71413e+06		6076866	4460276	2.94096e+06	8288814	17821452	11801701	74665.2
HCECSTDEVNSEDMDAYCR	3xCarbamidomethyl [C2; C4; C18]	2.74948e-07	0.000276662	1	1	2	P05556	P05556 [499-517]		0	2377.84							99116	160746		46111.6							125467	438091		150816							39065.5	50981.1		16916.5							67400.2	198520
HCDGNVSSCGDHPSEGCFCPPDK	4xCarbamidomethyl [C2; C9; C17; C19]	2.85986e-20	0.000276662	1	1	11	P04275	P04275 [2219-2241]		0	2618.98	2.21952e+06	2.43855e+06	1.47726e+06	636379	4.66123e+06	3.67147e+06	3.05539e+06	3.12914e+06	3.46952e+06	5.45145e+06		2.40605e+06	2.58293e+06	2.36539e+06	3.48487e+06	9.69745e+06	2.80911e+06	1.38161e+07	8.58667e+06	2.77849e+06	488326	677494	935911	74352.5	1.39124e+06	474903	1.20425e+06	992413	1.19406e+06	1.99992e+06		655244	436049	298973	592536	8856432	1.50904e+06	6.26072e+06
HATKTAKDALSSVQESQVAQQAR		6.01441e-05	0.000276662	1	1	1	P02656	P02656 [38-60]		2	2454.27		193956						321951					7.24907e+06						358973			53885.9						102107					1.22378e+06
HAEVVASIK		4.91952e-09	0.000276662	1	1	9	Q15599	Q15599 [209-217]		0	953.541	3.21653e+06	2.02745e+06	873679	4.09885e+06	2.90804e+06	7.69422e+06	1.63252e+06	1.89934e+06	2.7076e+06	2.11702e+06			2.83805e+06	2.10848e+06	4.03225e+06	1.67841e+06	1.07061e+06		224771	4.04371e+06	707682	563277	553516	478896	867967	995244	643439	602381	931834	776649			479117	266502	685607	1.53284e+06	575124
GVWGSVCDDNWGEK	1xCarbamidomethyl [C7]	5.39214e-13	0.000276662	1	1	8	O43866	O43866 [263-276]		0	1608.67	1.1303e+06	539186	541181		1.45048e+06		562198	571339	438683	949431		596514				308293	509529		539580		248681	149800	342863		432926		221585	181202	150975	348308		162450				281556	273716
HAETSSGGQAASSQEQAR		9.25755e-06	0.000276662	1	1	1	P20930	P20930 [1657-1674]		0	1801.81														719833	155485																			90983.3	26437.2
GYTQQLAFR		2.5222e-05	0.000276662	1	1	19	P01024	P01024 [1052-1060]		0	1083.56	1.43613e+06	866985	1.04186e+06	1.84741e+06	781509	1.37705e+06	1.47327e+06	2.82363e+06	1.98361e+06	1.83723e+06		145269	1.89048e+06	1.82852e+06	2.44145e+06	3.06039e+06	1.31125e+06	2.28215e+06	5.40572e+06	2.17742e+06	315969	240871	660068	215845	233258	178120	580673	895522	682669	674005		39561.5	319148	231116	415121	2.79497e+06	704394	1.03415e+06
GYSFTTTAER		3.61315e-05	0.000276662	1	2	18	P60709	P60709 [197-206]		0	1132.53	4.138e+06	1.03222e+07	5.41111e+06	7.1939e+06	5.00333e+06	5.33206e+06	1.57528e+07	9.2674e+06	1.18488e+07	2.89115e+06	8.4415e+06	2.19438e+07	3.88226e+07	3.55967e+07	1.47951e+07	1.26343e+07	1.14062e+07	3.11984e+06	8632944	2.19311e+07	910418	2.86778e+06	3.42819e+06	840512	1.49335e+06	689699	6208788	2.93918e+06	4.07783e+06	1.06064e+06	319607	5.976e+06	6.55399e+06	4.49924e+06	2.51563e+06	1.15386e+07	6.12734e+06	1.41375e+06
GYDCSDMSCPNDCHQHGR	3xCarbamidomethyl [C4; C9; C13]; 1xOxidation [M7]	1.90788e-06	0.000276662	1	1	3	P24821	P24821 [462-479]		0	2211.77	562055	328683	138578	1.19166e+06	521282	594707	326018	1.14365e+06	306021	324988		458504		721123	3.31578e+06	247156	734458	38080	488033	995016	123660	91316.7	87795.8	139229	155588	76925	128497	362712	105319	119225		124866		91146.3	563785	225722	394547	17255.9
GYDCSDMSCPNDCHQHGR	3xCarbamidomethyl [C4; C9; C13]	1.59295e-18	0.000276662	1	1	3	P24821	P24821 [462-479]		0	2195.77	779221	373946	228491	2.15984e+06	878998	691678	551877	1.37573e+06	381991	582183		404463	769525	1.27678e+06	4.51438e+06	674628	1.58352e+06		694894	1.27543e+06	171440	103892	144760	252349	262356	89468.2	217516	436315	131464	213579		110148	129911	161378	767584	616121	850659
GYAGNHCETK	1xCarbamidomethyl [C7]	0.00106863	0.000276662	1	1	1	Q08431	Q08431 [60-69]		0	1136.48	488066	478490	556352		365426	457668	484226	414536	547566			315126				99240.8	439606		237117	856471	107381	132937	352475		109069	59199.1	190852	131471	188448			85819.1				90634.1	236154
GWVTDGFSSLK		2.6706e-10	0.000276662	1	1	27	P02656	P02656 [61-71]		0	1196.59	1.34356e+07	1.1862e+08	8.23502e+07		5.60398e+06	5.50369e+06	7.44732e+07	1.52528e+08	1.30807e+08	6.6024e+07		8.57823e+07	4.44263e+06	3.43363e+06		4.50633e+06	1.06305e+08	3.4919e+06	3.26049e+08	2.85184e+07	2.95601e+06	3.29556e+07	5.21726e+07		1672626	711899	2.93528e+07	4.83746e+07	4.50179e+07	2.42215e+07		2.33613e+07	750000	433993		4.11552e+06	5.71064e+07	1.58235e+06
HAEMVHTGLK		6.25561e-08	0.000276662	1	1	4	Q01518	Q01518 [72-81]		0	1122.57	748995	387615	1.04658e+06	161804	287041	372768	670727	1.59563e+06	450352	538322			1.88872e+06	1.42863e+06	851333	1.03474e+06	2.65589e+06		1.17406e+06	2.43709e+06	164789	107689	663056	18904.7	85673.4	48217.3	264360	506058	154991	197489			318852	180572	144753	945000	1.42673e+06
HDLLVGAPLYMESR		2.9155e-05	0.000276662	1	1	3	P08514	P08514 [335-348]		0	1600.82			40114.4				68800.8	197860	67447.6			161489		136415		166068	123447		143905	106546			25414.3				27117.1	62751.9	23212.5			43978.6		17242.1		151666	66315.2
GTSQNDPNWVVR		6.80476e-12	0.000276662	1	1	8	P07996	P07996 [969-980]		0	1372.66	329773	1.89643e+06	565843		933856	321871	1.29436e+06	401430	804987	694310			1.4259e+06		626817	691097	649619	619537	960837	691513	72554.8	526876	358487		278729	41633.8	510158	127314	277041	254714			240719		106578	631161	348972	280742
GTITDAPGFDPLR		1.40511e-06	0.000276662	1	1	9	P50995	P50995 [192-204]		0	1359.69	157680	578835	217043	372232	211967	338056	507854	1.47214e+06	632334	258052		806518		903543	512300	485304	2.10021e+06	492195	365560	1.20963e+06	34691.9	160815	137507	43490.4	63266	43727.3	200165	466892	217621	94669		219641		114203	87106.8	443215	1.12822e+06	223037
GSSSGGGYSSGSSSYGSGGR		1.30832e-23	0.000276662	1	1	15	P35908	P35908 [525-544]		0	1740.71	9.72824e+06	6.67552e+06	2.43086e+06	2.94031e+07	5.46643e+06	2.50833e+07	5.62438e+06	5.38855e+06	4.26568e+06	3.68634e+06		2.17306e+06	7.38404e+06	6.26993e+06	1.21135e+07	1.53211e+06	3.55376e+06	2.97024e+06	1.411e+06	6.50475e+06	2.14035e+06	1.85463e+06	1.54006e+06	3.43537e+06	1.63157e+06	3.24451e+06	2.21679e+06	1.70899e+06	1.46806e+06	1.35237e+06		591795	1.24657e+06	792487	2.05967e+06	1.39924e+06	1.90906e+06	1.34596e+06
GSSGLGGGSSR		0.000405772	0.000276662	1	1	8	Q04695	Q04695 [16-26]		0	921.438	1.45336e+06	675259	614770	135778	653361	3.61139e+06	1.73173e+06	277503	639009	341424	873363	290651	4.04917e+06	1.8e+06	2.88121e+06	137019	1.74055e+06	529446	154621	435496	319760	187604	389485	15863.9	195009	467132	682543	88010.6	219919	125255	33066.7	79153.5	683577	227510	489895	125136	935011	239917
GSSGGGCFGGSSGGYGGLGGFGGGSFR	1xCarbamidomethyl [C7]	6.5912e-19	0.000276662	1	1	13	P13645	P13645 [60-86]		0	2342.98	1.49675e+06	2.58359e+06	3.1633e+06	1.17898e+06	3.70754e+06	4.58478e+06	3.5312e+06	2.19234e+06	3.1787e+06	2.16455e+06		1.9803e+06		1.65388e+06	2.00365e+06	1.25074e+06	1.33549e+06	1.66424e+06	1.30895e+06	444374	329305	717789	2.00409e+06	137748	1.10659e+06	593039	1391785	695307	1.09397e+06	794085		539299		209042	340682	1.14227e+06	717417	754147
GSQAVSYTR		0.00162965	0.000276662	1	1	19	Q9Y6R7	Q9Y6R7 [2122-2130]; [3323-3331]; [4524-4532]		0	968.48	1.47791e+07	1.26582e+07	9.34689e+06	5.47051e+06	4.6783e+06	3.05826e+06	4.96109e+06	7.38393e+06	1.11297e+07	6.12429e+06	1.15734e+07	4.091e+06	1.63075e+07	1.01043e+07	9.88786e+06	5.13079e+06	1.4203e+07	4.14161e+06	4716145	4.53102e+06	3.25161e+06	3.51679e+06	5.92168e+06	639156	1.39634e+06	395584	1.95536e+06	2.34183e+06	3.83034e+06	2.24675e+06	438187	1.11411e+06	2.75302e+06	1.27713e+06	1.68124e+06	4.68582e+06	7.62978e+06	1.87676e+06
GSLVQASEANLQAAQDFVR		3.58097e-15	0.000276662	1	1	2	P19827	P19827 [342-360]		0	2004.01	35035.6	65669	554337		485930	331514	832660	863046	321898	1.11341e+06					411476	1.2973e+06	263182		886818		7708.32	18244.5	351198		145036	42881.1	328184	273717	110783	408466					69963.7	1.18479e+06	141380
GSLGGGFSSGGFSGGSFSR		8.18285e-15	0.000276662	1	1	12	P13645	P13645 [41-59]		0	1707.77	183951	1.09874e+06	1.72266e+06	4.79889e+06	1.85475e+06	3.5435e+06	2.64027e+06	1.56254e+06	1.57705e+06	1.03159e+06		744307	4.33635e+06	360360	1.5081e+06	804992	2.31553e+06		946171	1.52911e+06	40471.7	305258	1.09138e+06	560687	553589	458350	1.04063e+06	495562	542750	378447		202699	732059	45547.7	256424	735179	1.24389e+06
GSSVIHCDADSK	1xCarbamidomethyl [C7]	1.99311e-18	0.000276662	1	1	32	P04003	P04003 [275-286]		0	1275.56	4.31715e+08	4.22924e+08	2.97822e+08	4.69666e+08	3.97649e+08	4.10279e+08	2.90606e+08	5.05292e+08	3.53786e+08	3.87756e+08	1.87079e+08	4.00219e+08	9.09223e+07	4.86833e+08	9.50375e+08	2.7932e+08	1.95184e+08	26956.2	2.74526e+08	2.51668e+08	9.49834e+07	1.17499e+08	1.88684e+08	5.48742e+07	1.18687e+08	5.30694e+07	1.14539e+08	1.60255e+08	1.21758e+08	1.42252e+08	7.08306e+06	1.08992e+08	1.53494e+07	6.15332e+07	1.61593e+08	2.55096e+08	1.04852e+08	12215.1
GSGSSQSSGYGR		4.9575e-13	0.000276662	1	1	20	Q86YZ3	Q86YZ3 [1106-1117]; [1340-1351]; [1576-1587]; [2046-2057]; [2516-2527]; [2750-2761]		0	1129.49	2.66327e+06	657144	481443	1.33743e+06	1.02691e+06	4.61309e+06	814352	436140	889540	343632	2.67005e+06	339540		1.24059e+06	1.22262e+06	120503	423185	457139	159221	619226	585958	182572	305016	156261	306503	596700	320968	138323	306140	126065	101092	92467.8		156805	207883	110053	227333	207152
GSGGLGGACGGAGFGSR	1xCarbamidomethyl [C9]	2.43999e-14	0.000276662	3	3	15	P04259; P02538; P48668	P04259 [43-59]; P02538 [43-59]; P48668 [43-59]		0	1424.63	6.82669e+06	2.0851e+06	2.23799e+06	1.93454e+06	5.20957e+06	1.06903e+07	6.69613e+06	1.137e+06	1.67174e+06	1.62853e+06	56291.7	1.0276e+06	1.42251e+07	9.35962e+06	3.25505e+06	339965	1.43701e+07	1.01685e+06	748329	2.26547e+06	1.50197e+06	579296	1.41787e+06	226025	1.55491e+06	1.38279e+06	2639208	360602	575337	597443	2131.28	279848	2.40148e+06	1.18301e+06	553460	310481	7.71953e+06	460784
GSGGGSSGGSIGGR		1.99311e-18	0.000276662	1	1	49	P04264	P04264 [603-616]		0	1092.5	3.92488e+08	2.05789e+08	6.65606e+07	5.40311e+08	1.86863e+08	8.75854e+08	1.40139e+08	9.09245e+07	1.28487e+08	6.56666e+07	6.24104e+08	6.24629e+07	2.83777e+08	2.8295e+08	3.14814e+08	3.50421e+07	9.47605e+07	9.08535e+07	3.84333e+07	1.69898e+08	8.63528e+07	5.71735e+07	4.21692e+07	6.31282e+07	5.57732e+07	1.13291e+08	5.52343e+07	2.88369e+07	4.42194e+07	2.40904e+07	2.36294e+07	1.70107e+07	4.7907e+07	3.57634e+07	5.3528e+07	32003018	5.09048e+07	4.117e+07
GSGDSSQVTQVSPQR		8.48764e-14	0.000276662	1	1	14	P05106	P05106 [99-113]		0	1532.73	467152	2.13926e+06	1.01074e+06	294340	1.18747e+06	875874	1.59223e+06	2.322e+06	1.03621e+06	896246		3.208e+06	1.00229e+07	8.1247e+06	2.39353e+06	1.72709e+06	1.9534e+06	702376	1.16438e+06	3.09591e+06	102780	594343	640348	34389.8	354426	113294	627561	736427	356618	328796		873643	1.69206e+06	1.02692e+06	406974	1.57731e+06	1.04936e+06	318280
GSFEFPVGDAVSK		3.75803e-11	0.000276662	2	2	12	P0C0L4; P0C0L5	P0C0L4 [917-929]; P0C0L5 [917-929]		0	1339.65	2.80216e+06	2.22329e+06	2.57463e+06	2.5574e+06	3.41947e+06	1.15206e+06	1.65685e+06	4.06827e+06	2.99225e+06	4.24067e+06		8.28935e+06	1.59733e+06	1.56497e+06	4.10944e+06	5.89712e+06	4.54876e+06	2.27154e+06	4.03774e+06	3.45869e+06	616515	617688	1.63114e+06	298798	1.02061e+06	149019	653030	1.29026e+06	1.0298e+06	1.55573e+06		2.25746e+06	269660	197805	698731	5.38569e+06	2.44357e+06	1029340
GSFDISCDKDNKR	1xCarbamidomethyl [C7]	3.05294e-14	0.000276662	1	1	5	P49913	P49913 [119-131]		2	1541.7	474650	3.28331e+06	2.00396e+06		236594	275276	1.44935e+06	2.64721e+06	1.40307e+06	905591		1.34743e+06		409977	189802	2.0426e+06	5.17705e+06		3.46233e+06	1.52952e+06	104430	912189	1.2696e+06		70616.5	35606.8	571248	839567	482874	332225		366949		51819.1	32272.2	1.86546e+06	2.78108e+06
GSFDISCDKDNK	1xCarbamidomethyl [C7]	3.11547e-10	0.000276662	1	1	3	P49913	P49913 [119-130]		1	1385.6	499252	2.92236e+06	1.29911e+06	106882	135707	285324	894671	1.20613e+06	733693	413591		1.87611e+06	136919	211095	97421.7	967381	2.34351e+06			849128	109842	811906	823045	12487.7	40504.6	36906.5	352625	382526	252505	151730		510925	23114.6	26681.3	16564.7	883485	1.25892e+06
GSGSGQSPSYGR		7.1969e-12	0.000276662	1	1	13	Q86YZ3	Q86YZ3 [897-908]		0	1139.51	2.73001e+06	989527	429625	2.8934e+06	1.23683e+06	5.82991e+06	1.02356e+06	652360	854638	433488	2.84362e+06	488185		1.15952e+06	1.90608e+06	229870	446747			1.27952e+06	600640	274916	272187	338056	369159	754096	403423	206898	294128	159029	107663	132948		146557	324093	209935	239990
GTNYLADVFEK		6.4288e-06	0.000276662	1	1	8	P31151	P31151 [51-61]		0	1256.62	1.2723e+06	1.21333e+06	590667	7.16938e+06	1.45874e+06	1.5698e+06	1.669e+06	1.0877e+06	732019	806182		1.99152e+06	3.3979e+06	3.79065e+06	696330	443326	840979	834232	621032	1.33308e+06	279925	337096	374215	837648	435391	203053	657818	344968	251928	295755		542356	573631	479119	118398	404879	451769	378030
GSTLTSPCQDFGK	1xCarbamidomethyl [C8]	2.80237e-06	0.000276662	1	1	3	P08567	P08567 [52-64]		0	1397.64	416207	937074	385559	148870	395989	337026	2.08828e+06	3.16742e+06	553738	297575	5.35011e+06	3.05485e+06		7.44204e+06	2.42692e+06	704200	1.17875e+06		691283	2.34782e+06	91571.4	260343	244269	17393.5	118191	43594.1	823072	1.00455e+06	190572	109168	202563	831934		940636	412652	643128	633219
GSVVTNERDQALQLQVLNSR		0.000750837	0.000276662	1	1	1	Q13201	Q13201 [883-902]		1	2227.18
GTLSTTITGR		6.36198e-07	0.000276662	1	1	20	P08519	P08519 [3906-3915]		0	1006.55	2.18059e+07	4.05922e+07	1.44547e+08	6.22195e+06	2.28129e+07	2.16873e+07	6.4424e+07	5.1798e+07	4.10641e+07	2.33691e+07		5.91609e+07	2.29882e+08	9.7582e+07	2.86576e+07	4.17462e+07	6.89063e+07	1.86403e+07	6.57729e+07	1.1173e+07	4.79761e+06	11277565	9.15773e+07	726953	6808998	2.80524e+06	2.5392e+07	1.64279e+07	1.41324e+07	8.57317e+06		1.61114e+07	38808550	1.23339e+07	4.87268e+06	3.81257e+07	3.70161e+07	8.44681e+06
GTGKPLEVNFAK		0.000913283	0.000276662	1	1	3	P24043	P24043 [3096-3107]		0	1260.69	135003	338652							278280				296240			655963			574981	367491	29702.5	94086.4							95771.7				50011			599075
GTFSTTVTGR		4.80493e-06	0.000276662	1	1	19	P08519	P08519 [4134-4143]		0	1026.52	1.42139e+07	3.7465e+07	1.51285e+08	2.81169e+06	1.55831e+07	1.19848e+07	5.31028e+07	3.98222e+07	3.31605e+07	1.75146e+07	174503	5.39014e+07		6.30223e+07	2.05028e+07	3.29823e+07	5.64222e+07	1.56647e+07	4.56386e+07	1.14576e+07	3.12725e+06	1.04088e+07	9.58457e+07	328508	4.65112e+06	1.55022e+06	2.09299e+07	1.26297e+07	1.14124e+07	6.4254e+06	6606.91	1.46791e+07		7.9657e+06	3.48612e+06	30121888	3.03097e+07	7098403
GTFSQLSELHCDK	1xCarbamidomethyl [C11]	5.01181e-15	0.000276662	1	1	9	P02042	P02042 [84-96]		0	1521.7	982919	3.06416e+06	1.02739e+06		246154		5.90302e+06	2.43884e+06	2.399e+06	1.14419e+06		5.14077e+06			2.24128e+06	1.24048e+06	7.40854e+06		1.76085e+06	1.8154e+06	216256	851303	650897		73469.9		2.32661e+06	773483	825629	419758		1.4e+06			381087	1.1329e+06	3.97983e+06
GTFATLSELHCDKLHVDPENFR	1xCarbamidomethyl [C11]	3.57829e-20	0.000276662	1	1	1	P68871	P68871 [84-105]		1	2586.24
GTFATLSELHCDK	1xCarbamidomethyl [C11]	1.15781e-16	0.000276662	1	1	18	P68871	P68871 [84-96]		0	1478.69	2.30452e+07	7.41115e+07	4.01e+07	3.0212e+06	8.56294e+06	7.87034e+06	1.2792e+08	5.19006e+07	6.18286e+07	2.47443e+07		1.36668e+08	4.42588e+07	3.36506e+07	4.05731e+07	3.96839e+07	1.99524e+08	1.30063e+07	8.43378e+07	3.94718e+07	5.07026e+06	20590086	25405162	352987	2555791	1.01802e+06	5.04182e+07	1.64604e+07	2.12787e+07	9077686		3.72192e+07	7.47173e+06	4.25327e+06	6898688	3.62423e+07	1.07183e+08	5.89378e+06
GSTSHHLVSR		3.8439e-10	0.000276662	1	1	18	P04114	P04114 [1948-1957]		0	1080.55	8.14313e+07	8.80394e+07	2.71999e+08	2.3733e+07	6.07022e+07	1.76424e+07	1.67439e+08	8.66009e+07	1.95296e+08	1.2058e+08		1.71062e+08	2.97211e+08	2.34369e+08	8.99965e+07	3.33474e+08	2.67491e+08	4.55571e+07	1.96373e+08	7.65582e+07	1.7916e+07	2.44596e+07	1.72324e+08	2.77288e+06	1.81179e+07	2.28203e+06	6.59944e+07	27465677	6.72121e+07	44235741		4.65856e+07	5.01749e+07	2.9623e+07	1.53022e+07	3.04553e+08	1.43695e+08	2.06441e+07
GTFAQLSELHCDK	1xCarbamidomethyl [C11]	2.80237e-06	0.000276662	1	2	4	P69891	P69891 [84-96]		0	1505.71							640686									466852	1.02322e+06			2.16569e+06							252520									426364	549666
GTEAAGAMFLEAIPMSIPPEVK	2xOxidation [M8; M15]	3.94986e-15	0.000276662	1	1	5	P01009	P01009 [368-389]		0	2291.13								1.05274e+06	1.58529e+06	1.40547e+06		2.14519e+06			353430	1.03619e+06	194157	2.94298e+06	5.37956e+06	179609								333880	545586	515611		584205			60094.1	946328	104300	1.3336e+06
GTEAAGAMFLEAIPMSIPPEVK	1xOxidation [M15]	0.000995979	0.000276662	1	1	2	P01009	P01009 [368-389]		0	2275.13																			739262
GTDSCQGDSGGPLVCFEKDK	2xCarbamidomethyl [C5; C15]	6.83668e-18	0.000276662	1	1	4	P08519	P08519 [4490-4509]		1	2156.92		179696	973668				208465	435205				292392				453354	687918		603059			49924.1	616863				82164.1	138026				79627.9				414037	369545
GTDSCQGDSGGPLVCFEK	2xCarbamidomethyl [C5; C15]	9.02158e-06	0.000276662	1	1	12	P08519	P08519 [4490-4507]		0	1913.8	2.6043e+06	1.90571e+06	8.30888e+06		754162	1.08948e+06	2.74852e+06	2.23068e+06	1.59814e+06	951324		2.80988e+06	4.89654e+06	3.54485e+06	572089	1.20656e+06	2.05239e+06		1.68778e+06		572983	529457	5264055		225096	140923	1.0833e+06	707464	550008	349002		765222	826630	448052	97272.8	1.10192e+06	1.10253e+06
GTADVTHDLQEMK	1xOxidation [M12]	1.00861e-07	0.000276662	1	1	3	P11166	P11166 [233-245]		0	1460.67	1.75427e+06	534978	440468	316062	616515	955673	725065	988364	1.15792e+06	911754		1.78567e+06	2.44746e+06	3.25574e+06	3.52951e+06	778353	704287		726321	2.64567e+06	385964	148631	279057	36927.7	184012	123616	285777	313462	398503	334486		486295	413178	411508	600125	710850	378339
GSYGSGGSSYGSGGGSYGSGGGGGGHGSYGSGSSSGGYR		1.79177e-37	0.000276662	1	1	6	P04264	P04264 [550-588]		0	3312.31	1.53921e+07	8.21154e+06	5.24873e+06	9.62636e+06	6.09068e+06	2.45215e+07	5.90579e+06	4.87106e+06	9.13272e+06	2.25456e+06		1.6092e+06		4.28913e+06	5.58935e+06	1.61363e+06	4.36135e+06	4.04453e+06	2.27788e+06	6.02395e+06	3.38647e+06	2.28138e+06	3325309	1.12471e+06	1817894	3.17184e+06	2327704	1.54487e+06	3.14308e+06	827106		438238		542125	950362	1.47369e+06	2.34289e+06	1.83277e+06
GTEFAESADAALQGDPALQDAGDSSR		0.00102463	0.000276662	1	1	1	P04921	P04921 [98-123]		0	2579.15									111162						165372	147329	35691.7	66822.4	128046										38257.2						28118.4	134552	19173.4	30280.4
IADVTSGLIGGEDGR		7.67109e-16	0.000276662	1	1	9	P80108	P80108 [743-757]		0	1459.74	565032		517841		810454	327882		852856	313397	466215		1.45015e+06	1.39892e+06	1.23568e+06	450135	355253	991223	307794	551130		124315		328076		241897	42411.3		270485	107857	171036		394922	236164	156183	76536.8	324443	532479	139476
HEEAPGHRPTTNPNASK		0.000435424	0.000276662	1	1	3	P21291	P21291 [92-108]		0	1842.88	91174.4					536937		166422			114460	577223		1.57061e+06	564270					476992	20059.6					69452.5		52781.1			4333.62	157197		198517	95943.3
HEQDMVNGIMLSVEK		2.97115e-09	0.000276662	1	1	1	P04114	P04114 [746-760]		0	1729.82																256157			99534.5																	233941
HSCIFPGQYNPSFISDESR	1xCarbamidomethyl [C3]	1.35067e-16	0.000276662	1	1	6	Q9ULI3	Q9ULI3 [1358-1376]		0	2241	126587	194117	938838		1.09709e+06	115479	254319	682258		861095		436258				944915	275324	190010	396507	218884	27850.8	53930.6	594797		327451	14937.2	100237	216380		315901		118807				862967	147903	86102.7
HSASQEGQDTIR		2.61924e-09	0.000276662	1	1	2	P20930	P20930 [506-517]; [1155-1166]; [1803-1814]; [2128-2139]; [3424-3435]; [3748-3759]		0	1328.62													1.7521e+06																				295789
HRPELIDYGK		0.000450892	0.000276662	1	1	7	P12814	P12814 [186-195]		0	1227.65	233214	489135	115627	254020	460232		1.03637e+06	493629	445645	593017		334196	887118	6.0316e+06	780874	826342	956433		1.58792e+06	1.42932e+06	51310.4	135894	73255.1	29678.9	137366		408475	156556	153371	217554		91012.4	149762	762364	132773	754677	513791
HRLEDMEQALSPSVFK		2.3986e-16	0.000276662	1	1	1	P05155	P05155 [365-380]		1	1886.94																288381			233004																	263371
HRHPDEAAFFDTASTGK		4.12908e-18	0.000276662	1	1	15	P02671	P02671 [511-527]		1	1886.88			356585		1.03866e+06	274378	320534	945750	244975	395972				350016	254727	1.76354e+06	891419	1.98888e+07	2.13447e+06	2.27812e+06			225913		310010	35490.6	126335	299947	84309.6	145266				44240.2	43311.6	1.61059e+06	478865	9.01255e+06
HQTVPQNTGGK		2.21211e-14	0.000276662	1	1	36	P02787	P02787 [554-564]		0	1166.59	5.69815e+06	7.96214e+06	6.45388e+06	1.33361e+07	3.67085e+07	8.82223e+07	6.48658e+07	1.1285e+08	2.90904e+07	5.62277e+07	2.30057e+07	4.73976e+07	1.1231e+07	1.00384e+07	4.67333e+07	5.54281e+06	3.24832e+07	7.05052e+07	2.82468e+07	1.10378e+08	1.25367e+06	2.21209e+06	4.08883e+06	1.55815e+06	1.09564e+07	1.14115e+07	2.55662e+07	35790769	1.00116e+07	2.06277e+07	871027	1.29079e+07	1.896e+06	1.26881e+06	7.9461e+06	5.0621e+06	1.74498e+07	31949238
HSDLQEVENEITK		3.40182e-21	0.000276662	1	1	16	Q9ULI3	Q9ULI3 [1086-1098]		0	1541.74	1.35357e+06	1.11802e+06	2.81638e+06		3.22529e+06	1.49848e+06	813947	1.69643e+06	1.93363e+06	2.909e+06			1.39009e+06	745739		2.49309e+06	707342	963549	810908	2.01844e+06	297804	310615	1.7843e+06		962656	193827	320809	538026	665471	1.0672e+06			234674	94257.6		2.27688e+06	379980	436630
HQPQEFPTYVEPTNDEICEAFR	1xCarbamidomethyl [C18]	1.15967e-24	0.000276662	1	1	7	P02774	P02774 [128-149]		0	2707.21					467790	426725	640491	1.25137e+06	446003	1.08252e+06		1.69813e+06				405630	949330	2.19365e+06	746222	168315					139622	55196.6	252443	396876	153494	397131		462455				370452	509975	994046
HQLYIDETVNSNIPTNLR		6.52474e-12	0.000276662	1	1	5	P02675	P02675 [179-196]		0	2127.08												956901				1.21641e+06		1.59741e+06	748365													260595				1.11092e+06		723860
HQGVMVGMGQK	1xOxidation [M]	3.73465e-15	0.000276662	2	7	16	P63267; P60709	P63267 [41-51]; P60709 [40-50]		0	1187.57	69398	1.07023e+06	226945	1.13181e+06	513499	390565	2.43324e+06	2.33903e+06	1.45521e+06	248690		4.4885e+06	1.06495e+07	7.10485e+06	4.63977e+06	2.80205e+06	2.50278e+06	490041	2.44982e+06	4.34255e+06	15268.5	297338	143780	132237	153265	50519.4	959037	741828	500817	91234.4		1.22236e+06	1.79784e+06	898016	788904	2.55904e+06	1.34448e+06	222061
HQGVMVGMGQK		1.75292e-15	0.000276662	2	7	4	P63267; P60709	P63267 [41-51]; P60709 [40-50]		0	1171.57		77131.5	53587.5	116853	124894		588311	875809	378651	187303		58928	1.55326e+06	532095	380283	789517	356312	302475	908658	681675		21429.1	33950.1	13652.7	37277.3		231877	277765	130315	68713.8		16048	262220	67254.1	64659.8	721046	191409	137066
HQFLLTGDTQGR		1.24173e-07	0.000276662	1	1	17	P04217	P04217 [79-90]		0	1372.7	849510	1.29987e+06	629962	266977	1.05605e+06	779564	2.1513e+06	1.8959e+06	919292	1.36137e+06		1.54815e+06	370655	194864	183692	329794	1.79444e+06	2.96873e+06	1.4589e+06	3.19047e+06	186904	361137	399110	31192.7	315199	100836	847912	601288	316380	499433		421611	62573.7	24629.8	31233.3	301193	963963	1.34527e+06
HPYFYAPELLFFAK		1.62058e-07	0.000276662	1	1	4	P02768	P02768 [170-183]		0	1742.89
HPVTGQFLYQDSNWASK		1.37514e-09	0.000276662	1	1	2	P02786	P02786 [515-531]		0	1977.95								2.28836e+06											2.00842e+06									725759
HQNQWYTVCQTGWSLR	1xCarbamidomethyl [C9]	3.65133e-16	0.000276662	1	1	8	O43866	O43866 [155-170]		0	2063.95			3.62433e+06		2.15513e+06		639399	726446		1.02846e+06						4.06302e+06	252401	444558	6.06848e+06				2296180		643246		252013	230394		377300						3.71065e+06	135589	201450
HPPEASVQIHQVSR		1.53977e-05	0.000276662	1	1	6	Q14766	Q14766 [489-502]		0	1584.82		434925	228896		470599	234463	359290	181548	299215	197158		430198	1.25169e+06	541682	614549	384969		293084	253816	361698		120834	145016		140460	30327.7	141610	57578.3	102976	72329.2		117157	211310	68465.9	104492	351582		132810
HSGIGHGQASSAVR		1.1876e-06	0.000276662	1	1	1	P20930	P20930 [2019-2032]; [2343-2356]; [2667-2680]; [2991-3004]; [3639-3652]		0	1363.68
HSHESQDLR		9.2125e-07	0.000276662	1	1	19	P04196	P04196 [112-120]		0	1108.51	7.13502e+06	6.30705e+06	5.13767e+06	1.10041e+07	7.36474e+06	1.89768e+07	1.02637e+07	1.47092e+07	7.36369e+06	1.21006e+07		1.13968e+07	4.41831e+06	7.85705e+06	1.19463e+07	2224.76	605309	2.4382e+06	896646	2.04171e+06	1.5698e+06	1.75226e+06	3.25495e+06	1.28569e+06	2.19816e+06	2.45464e+06	4045318	4.66506e+06	2534256	4.43921e+06		3.10373e+06	745895	993091	2.03124e+06	2031.82	325169	1.10487e+06
HTSLGPLEAK		2.6703e-07	0.000276662	1	1	4	P07357	P07357 [470-479]		0	1052.57	412842	628620	270923	1.19177e+06	962257	1.17819e+06	908438	1.40163e+06	905795	1.04806e+06		3.94495e+06	3.44878e+06	521966	1.45934e+06	1.56864e+06	737291	4.73903e+06	1.1865e+07	1.41329e+06	90831.1	174647	171642	139242	287206	152398	358051	444530	311734	384492		1.07434e+06	582220	65973.9	248132	1.4326e+06	396068	2.14748e+06
HTQTSSGGQAASSHEQAR		9.0616e-26	0.000276662	1	1	1	P20930	P20930 [2630-2647]; [2954-2971]		0	1839.83
HTNYTMEHIR		9.79139e-05	0.000276662	1	3	1	P12814	P12814 [705-714]		0	1301.61	40963.9						47370.1	39898.8	28188.1							44674.4	70305.9		133474	102943	9012.63						18670.4	12654	9701.11							40800	37767.9
HTLNQIDEVK		1.0096e-14	0.000276662	1	1	5	P02765	P02765 [58-67]		0	1196.63	5.61225e+06	5.48042e+06	1.95836e+06	3.91714e+06	4.48655e+06	1.12029e+07	1.45296e+07	1.06991e+07	5.52152e+06	9.20908e+06		9.32302e+06	3.68277e+06	2.85915e+06	3.55668e+06	2.3643e+07	1.07752e+07		7097316	2.23797e+07	1.23477e+06	1.5226e+06	1.24071e+06	457666	1.33911e+06	1.44909e+06	5726708	3393240	1.90026e+06	3.37844e+06		2538960	621722	361382	604745	21592564	5788379
HTFMGVVSLGSPSGEVSHPR	1xOxidation [M4]	4.27646e-27	0.000276662	1	1	6	P02765	P02765 [318-337]		0	2097.02		255357					454656	764495		490173						1.62476e+06	480578		365503	496455		70944.8					179198	242461		179825						1.48385e+06	258164
HTFMGVVSLGSPSGEVSHPR		1.54299e-25	0.000276662	1	1	5	P02765	P02765 [318-337]		0	2081.02								369175								2.22763e+06	359352											117085								2.03443e+06	193042
HSHAGELEALGGVKPAVLTR		2.85559e-30	0.000276662	1	1	8	P02730	P02730 [161-180]		0	2042.11			886790		377496		1.13559e+06	1.07052e+06	1.1732e+06	1.06564e+06				872377		733922	1.58197e+06	633280	721992				561822		112672		447581	339516	403763	390941				110264		670273	849828	286969
HSVCINGK	1xCarbamidomethyl [C4]	0.00125671	0.000276662	1	1	2	Q9BXR6	Q9BXR6 [367-374]		0	914.451				74514.7	102631	148899						266431				502045		285830	300098					8706.06	30632.5	19260						72557.8				458505		129523
HSTFIPGTNK		2.01177e-12	0.000276662	1	1	7	P08519	P08519 [4260-4269]		0	1101.57	9.6044e+06	1.33002e+07	268977	2.96713e+06	8.32786e+06	6.46721e+06	2.41459e+07	1.24869e+07	1.27674e+07	9.12188e+06		9.12461e+06			1.53584e+07	3.49076e+07	5.87742e+07		2.37909e+07	5.28439e+06	2.1131e+06	3.69513e+06	170409	346670	2485629	836531	9516850	3.96024e+06	4.39396e+06	3.34645e+06		2.48493e+06			2.6114e+06	3.18803e+07	3.15732e+07
HSQFIGYPITLFVEK		5.9801e-14	0.000276662	1	2	1	P07900	P07900 [210-224]		0	1778.95																526770																				481086
HSQAVEELAEQLEQTK		3.91622e-16	0.000276662	1	1	2	P35579	P35579 [1194-1209]		0	1839.91			63444.9					293943	82377.9						187429	348856	94270.7		507602				40195.3					93224.7	28350.8						31868.7	318601	50641.7
HSPICHTTMAFLR	1xCarbamidomethyl [C5]	5.4682e-13	0.000276662	1	1	5	P08514	P08514 [572-584]		0	1570.76		142598	126890				382220	712436	131889					556086		873050	502900	189261	1.14792e+06			39617.4	80390.6				150648	225951	45390.4					70286.4		797334	270155	85763
HSLPDIQLLQK		1.60286e-14	0.000276662	1	1	12	Q13201	Q13201 [951-961]		0	1291.74	2.20776e+06	6.86121e+06	4.46195e+06	834767	4.63721e+06	1.90013e+06	7.52818e+06	1.44269e+06	6.34894e+06	3.00852e+06		1.03978e+07	7.39551e+06	8.72701e+06	4.82586e+06	4.75941e+06	1.38982e+06		7.84658e+06	8.20149e+06	485737	1.90622e+06	2.82685e+06	97531.5	1.38407e+06	245781	2.96715e+06	457551	2.18502e+06	1.1037e+06		2.83166e+06	1248503	1.10305e+06	820546	4.34665e+06	746605
HSIFTPETNPR		6.2755e-09	0.000276662	1	1	9	P00747	P00747 [513-523]		0	1298.65		207917		192558	231975	295558	526743	775650	510238	630739		624514	457880	80229	166094	765908	464291	734363	652116	709442		57764.7		22497.8	69238	38230.3	207610	245999	175601	231392		170075	77298.9	10140.5	28241	699484	249415	332775
HSTIFENLANK		4.7499e-18	0.000276662	1	1	15	P02787	P02787 [226-236]		0	1273.65	2.08021e+06	3.39768e+06	3.10343e+06	2.93021e+06	1.22337e+07	1.18435e+07	1.7991e+07	4.2784e+07	8.19477e+06	1.64501e+07		3.61081e+06		522849	5.74692e+06	2.75416e+06	1.54443e+07	6.78792e+06	1.33932e+07	2.20947e+07	457675	943962	1.96617e+06	342356	3.65142e+06	1.53194e+06	7.09097e+06	13569060	2.82028e+06	6.03487e+06		983340		66085.4	977154	2.51531e+06	8.29657e+06	3.07593e+06
HELQANCYEEVKDR	1xCarbamidomethyl [C7]	1.62929e-17	0.000276662	1	1	11	P23528	P23528 [133-146]		1	1790.81	47771.8	338071	41772.4	357245	74473.2	606155	697218	1.58296e+06	1.8098e+06	173580		521131	2.92648e+06	2.26342e+06	1.19942e+06	165117	146839		175292	1.49061e+06	10510.5	93925	26464.7	41739.4	22228.1	78405.8	274801	502040	622851	63679.4		141921	494046	286084	203938	150797	78881.4
HPITNAIDGK		1.50162e-05	0.000276662	1	1	2	P24043	P24043 [97-106]		0	1065.57	207752	232236	107182	144596	185410	127970	169960	318789	211597	168190	409586			174162		303853	93210.5	845306	259075	347025	45708.4	64521.1	67904.6	16894.1	55339.5	16552.9	66988.1	101105	72822.3	61702.3	15507.5			22013.2		277501	50072.1	383048
HNVYINGITYTPVSSTNEK		1.69142e-29	0.000276662	1	1	24	P01023	P01023 [646-664]		0	2137.06	2.71669e+06	3.00482e+06	2.71487e+06		2.87655e+06	1.47438e+06	2.19925e+06	1.24076e+06	3.98519e+06	2.11971e+06		2.57138e+06		1.72191e+06	3.93456e+06	2.07695e+06	748213	1.69411e+06	2.91393e+06	3.10713e+06	597710	834815	1.71999e+06		858567	190711	866810	393510	1.37153e+06	777636		700269		217640	668996	1.89682e+06	401936	767683
HGTDDGVVWMNWK		2.52508e-10	0.000276662	1	1	4	P02675	P02675 [459-471]		0	1544.7												105758			93379.4	1.34794e+06	72095.5	6.41067e+06	1.26902e+06													28801.4			15877.4	1.23104e+06	38729.3	2.90498e+06
HGSSSGSSSSYGQHGSGSR		4.76465e-16	0.000276662	1	1	17	Q86YZ3	Q86YZ3 [973-991]; [1443-1461]; [1913-1931]; [2383-2401]		0	1808.75	3.7545e+06	1.26816e+06	814277	5.07768e+06	2.18183e+06	9.53239e+06	1.65167e+06	800004	1.58303e+06	544043		591243	1.09775e+06	2.03515e+06	2.52484e+06	275850	709140	1.34223e+06	683949	2.44335e+06	826042	352327	515882	593259	651212	1.23301e+06	650987	253723	544807	199587		161014	185320	257232	429300	251927	380946	608228
HGSSSGSSSHYGQHGSGSR		9.90151e-14	0.000276662	1	1	6	Q86YZ3	Q86YZ3 [1209-1227]; [2619-2637]		0	1858.78	5.90896e+06	1.51426e+06		5.54683e+06	1.26688e+06	4.89813e+06	4.76131e+06	79557.2	1.9197e+06	1.04951e+06			1.65736e+06		1.06782e+06	749485	1.93328e+06	2.60229e+06			1300054	420702		648074	378127	633570	1.87662e+06	25231.7	660675	385022			279794		181562	684486	1.03855e+06	1.17922e+06
HGSGSGQSSSYGPYR		6.13581e-11	0.000276662	1	1	6	Q86YZ3	Q86YZ3 [1014-1028]		0	1526.66	1.16154e+06	390488	208949	777931	493502	1.51112e+06	430445	191574	230202	153454		270964		353741	310164	131807	210772		176297	436004	255556	108488	132379	90890.9	147296	195463	169655	60758.2	79225.2	56296.1		73792.2		44711	52737.4	120376	113225
HGSGSGQSSGFGHK		3.77551e-06	0.000276662	1	1	3	Q86YZ3	Q86YZ3 [922-935]		0	1329.59	1.00645e+07	2.98148e+06	1.81265e+06	1.01043e+07	5.58375e+06	2.73672e+07	4.21922e+06	2.30438e+06	4.17555e+06	1.6518e+06		2.13551e+06	5.21323e+06	6.30193e+06	1.31922e+07	1.36839e+06	1.96529e+06	374890	7598.71	35527.2	2.21433e+06	828332	1.1484e+06	1180550	1.66659e+06	3.53993e+06	1.66296e+06	730840	1.43704e+06	605980		581569	880093	796532	2.24308e+06	1.24972e+06	1.05574e+06	169880
HGSGSGHSSSYGQHGSGSGWSSSSGR		3.27722e-27	0.000276662	1	1	8	Q86YZ3	Q86YZ3 [1365-1390]; [1835-1860]; [2305-2330]		0	2477.02	651755	664954		1.22352e+06	671457	1.89153e+06	837849	207201	669803	232458				973414	668227	164698	226825	442482	392465	614917	143395	184742		142953	200411	244668	330229	65714.4	230516	85279.3				123035	113619	150414	121849	200509
HGVIVAADSR		2.86124e-08	0.000276662	1	1	6	P28074	P28074 [69-78]		0	1024.55	195493	658072	172321	498913	117699	302469	200892	52243.3	144749	91411.5		215303		212855	203135	167880	125874	505728	388802	78283.3	43011.2	182830	109173	58291.4	35129.6	39124.2	79179.5	16569.1	49816.2	33535.2		58634		26903.8	34539.2	153321	67619	229169
HGSGLGHSSSHGQHGSGSGR		3.55617e-24	0.000276662	1	1	11	Q86YZ3	Q86YZ3 [1248-1267]; [1718-1737]; [2658-2677]		0	1885.84	1.59923e+06	1.68043e+06	1.11647e+06	3.19189e+06	1.80131e+06	5.24292e+06	1.81653e+06	911564	1.37266e+06	718623			6.17045e+06	1.5009e+06	1.64351e+06	717716	1.05641e+06	2.80802e+06	768868	3.01728e+06	351853	466866	707335	372930	537639	678169	715965	289105	472409	263634			1.04169e+06	189706	279448	655472	567500	1.27245e+06
HGGLYHENMR		5.65426e-14	0.000276662	1	1	15	P08603	P08603 [332-341]		0	1213.55		590016	631282	6.40254e+06	2.27563e+06	1.98582e+06	2.43186e+06	6.18268e+06	1.31204e+06	2.42651e+06		972871	1.08741e+06	1.24527e+06	2.30008e+06	2.00314e+06	3.08603e+06	3.71133e+06	4.44049e+06	3.06412e+06		163922	399946	748052	679211	256865	958491	1.96085e+06	451547	890187		264944	183576	157396	391084	1.82942e+06	1.6578e+06	1.68178e+06
HGGGGGGFGGGGFGSR		5.32621e-39	0.000276662	1	1	33	P35908	P35908 [46-61]		0	1320.58	5.84589e+07	5.33484e+07	1.61001e+07	4.52035e+08	2.68388e+07	1.27048e+08	3.73548e+07	4.42564e+07	3.9387e+07	3.6381e+07	42576.1	1.73736e+07	1.15375e+08	1.2192e+08	5.30965e+07	9.66751e+06	3.7657e+07	4.04522e+06	22673764	4.66072e+07	1.28618e+07	14821566	1.02001e+07	5.28143e+07	8.01061e+06	1.64336e+07	1.4723e+07	1.4036e+07	1.35553e+07	1.33467e+07	1611.99	4731380	1.94775e+07	15410018	9.02804e+06	8.82909e+06	20229140	1.83308e+06
HGAGSGQSLSHGR		4.80558e-15	0.000276662	1	1	15	Q86YZ3	Q86YZ3 [2762-2774]		0	1250.6	8.38847e+06	2.28012e+06	1.45353e+06	4.72351e+06	4.30794e+06	2.21641e+07	2.8957e+06	1.44214e+06	3.22918e+06	1.31194e+06		1.0688e+06	4.23896e+06	4.86856e+06	8.02436e+06	725949	1.65594e+06	2.37758e+06	1.09833e+06	3.25832e+06	1845581	633477	920876	551879	1.2858e+06	2.86691e+06	1.14131e+06	457379	1.11134e+06	481297		291068	715617	615362	1364390	662990	889560	1.07739e+06
HFSIHPDTGVITTTTPFLDR		1.32864e-06	0.000276662	1	1	4	Q08554	Q08554 [293-312]		0	2255.15
HFCGGTLISPEWVLTAAHCLK	2xCarbamidomethyl [C3; C19]	2.73165e-27	0.000276662	1	1	1	P08519	P08519 [4352-4372]		0	2397.18
HESENLYSIACDKPQQVR	1xCarbamidomethyl [C11]	1.49444e-14	0.000276662	1	1	13	P12110	P12110 [767-784]		0	2174.03	538825	809203	1.13621e+06		409614	801147	713611	951068	938947	374253		667547			324235	215369	572815		387354	513012	118549	224817	719843		122258	103628	281262	301633	323144	137298		181795			55129.9	196691	307713
HGHISCSTR	1xCarbamidomethyl [C6]	8.97653e-05	0.000276662	1	1	19	Q4LDE5	Q4LDE5 [446-454]		0	1054.48	934677	1.13314e+06	426204	906528	1.29452e+06	1.14821e+06	2.77702e+06	2.42164e+06	881492	1.57488e+06	15583.4	1.92097e+06	2.91718e+06	4.13067e+06	4.90768e+06	926237	113184	1.73084e+06	326950	557290	205642	314816	270020	105916	386377	148520	1.09453e+06	768030	303370	577760	590.008	523143	492476	522096	834458	845909	60801.9	784327
HPDEAAFFDTASTGK		1.60543e-22	0.000276662	1	1	12	P02671	P02671 [513-527]		0	1593.72	1.82766e+06	1.23439e+06	957421	1.35204e+06	4.13922e+06	3.06387e+06	1.64095e+06	2.54719e+06	932718	804776		1.28867e+06		750810	2.42962e+06	5.43098e+06	1.16588e+06	1.10093e+07	4.90507e+06	4.68539e+06	402112	342946	606570	157968	1.23544e+06	396310	646763	807846	321000	295240		350945		94898.6	413111	4.95997e+06	626304	4988844
HGVQELEIELQSQLSK		5.9988e-12	0.000276662	1	1	5	P35527	P35527 [375-390]		0	1837.97			1.8987e+06	506458	1.1726e+06	908634	678847	723333		374273		2.60465e+06			542295	2.94489e+06			2190168				1202912	59173	349987	117531	267560	229407		137305		709332			92206.9	2.68949e+06
HKVYACEVTHQGLSSPVTK	1xCarbamidomethyl [C6]	1.27817e-29	0.000276662	1	1	6	P01834	P01834 [82-100]		1	2141.08	176454	366826	341266	344860	777936		261559	416842	308972	454998		546821		293797		275593	275031		357483	366605	38822.4	101914	216208	40292.3	232192		103091	132202	106334	166920		148917		37134.4		251692	147745
HIYYITGETK		5.55632e-09	0.000276662	1	2	3	P07900	P07900 [490-499]		0	1224.63																930468	339682		231124																	849773	182475
HIYAISSAALSASYK		4.66584e-25	0.000276662	1	1	71	P04114	P04114 [1838-1852]		0	1581.83	1.11759e+06	1.19228e+06	2.76904e+07	1.03727e+07	2.03424e+06	1.48627e+06	5.32888e+06	4.13386e+06	7.837e+06	8.30997e+06	458144	2.44369e+07		3.14395e+06	2.46385e+06	4.72814e+07	8.2497e+06	1.97773e+06	2.74925e+07	5.66693e+06	245885	331245	1.75431e+07	1.21191e+06	607162	192248	2.10032e+06	1.31106e+06	2.69715e+06	3.04859e+06	17346	6.65496e+06		397379	418931	4.31809e+07	4.43169e+06	896205
HIVTFDGQNFK		5.43028e-22	0.000276662	1	1	63	P04275	P04275 [1957-1967]		0	1305.66	6.52522e+07	7.55843e+07	5.93847e+07	1.81424e+07	1.44177e+08	7.08575e+07	9.26629e+07	1.33226e+08	1.73722e+08	2.03733e+08		4.43719e+07	8.86478e+07	8.05778e+07	5.45453e+07	1.26343e+08	6.45642e+07	3.54818e+08	2.71853e+08	7.70272e+07	1.43564e+07	2.09993e+07	3.76229e+07	2.11971e+06	4.30327e+07	9.16538e+06	3.65221e+07	4.22528e+07	5.97874e+07	74741386		1.20839e+07	1.49654e+07	1.01846e+07	9.27439e+06	1.15386e+08	3.46835e+07	1.60785e+08
HLVQQEGQLEQQER		5.05628e-07	0.000276662	1	1	11	P07476	P07476 [405-418]		0	1721.86	516427	473595	248896	1.09521e+06	393519	1.3448e+06		193073		540962				194923	510641	202807	603151	319554	172861	420377	113621	131577	157687	127961	117454	173949		61233.6		198457				24637.3	86824.7	185218	324009	144805
HLVFPLLEFLSVK		0.00146336	0.000276662	1	1	1	P60228	P60228 [17-29]		0	1541.91	9.02367e+06	3.1557e+06	1.62386e+06	9.51836e+06	5.52136e+06	1.71068e+07	4.6883e+06	3.0223e+06	5.80213e+06	4.98637e+06		3.93651e+06		1.12954e+07	6.49849e+06	746215	1.36059e+06		1.1002e+06	1.44364e+06	1.98533e+06	876736	1.02879e+06	1.11209e+06	1647967	2.21276e+06	1.84785e+06	958529	1.99683e+06	1.8293e+06		1.07204e+06		1.42768e+06	1.10494e+06	681499	730900
HITSLEVIK		4.04349e-09	0.000276662	2	2	10	P10720; P02776	P10720 [57-65]; P02776 [54-62]		0	1039.61	1.94195e+06	555189			1.53902e+06	3.42468e+06	2.01483e+06	2.01664e+06	2.69291e+06	1.45208e+06		1.90138e+06		1.83686e+06	6.72151e+06	1.08188e+06	1.83804e+06	1.55786e+06	477776	3.5417e+06	427257	154246			459354	442981	794124	639581	926780	532709		517808		232170	1.14287e+06	988054	987383	705941
HHNQSTAINLNNPESQSMHLETR	1xOxidation [M18]	3.08675e-34	0.000276662	1	1	6	Q14152	Q14152 [211-233]		0	2674.24	2.13106e+07	6.54849e+06	2.12993e+06	5.08494e+06	2.11825e+06	2.62758e+06	579714	655540	365092	310284					286367						4.68863e+06	1.81934e+06	1.34941e+06	594108	632238	339876	228488	207906	125648	113831					48691.2
HLSQDTGSPSGMRPWEDLPSQDTGSPSR	1xOxidation [M12]	2.00722e-09	0.000276662	1	1	2	P12259	P12259 [893-920]		0	3041.37					865962		767523	617175	493096											156200					258465		302511	195739	169702
HIQNIDIQHLAGK		8.59447e-24	0.000276662	1	1	54	P04114	P04114 [2272-2284]		0	1486.81	4.76489e+07	4.22932e+07	1.53781e+08	8.61175e+06	3.44048e+07	2.85325e+06	5.11373e+07	4.90978e+07	1.11115e+08	5.99842e+07		6.97137e+07	151764	1.18693e+08	1.80635e+07	2.09618e+08	1.23981e+08	2.46336e+07	1.05198e+08	3.74142e+07	1.04834e+07	1.17502e+07	9.74275e+07	1.00617e+06	1.02689e+07	369066	2.01552e+07	1.55715e+07	3.82407e+07	2.20058e+07		1.89853e+07	25620.6	1.50022e+07	3.07136e+06	1.91439e+08	6.6602e+07	11162645
HINIDQFVR		2.69366e-09	0.000276662	1	1	22	P04114	P04114 [2101-2109]		0	1141.61	4.09428e+06	6.672e+06	3.22882e+07				61150.4	196010	291875	67683.6		4.30639e+06		6.49239e+06		3.18082e+07	3.36315e+07	204125	851763		900798	1.85365e+06	2.04561e+07				24101.8	62165	100450	24830.4		1.17277e+06		820606		2.90496e+07	1.80667e+07	92498.9
HLEQQQGQLEVPEQQVGQPK		9.61355e-24	0.000276662	1	1	5	P07476	P07476 [442-461]		0	2300.16	434969	475012	223294	1.31869e+06	684836	1.41677e+06	379687	237830		600044				398975	817935	194459	857381	213869	421111	812195	95699.1	131971	141467	154071	204404	183259	149650	75428.3		220132				50428.4	139074	177595	460581	96914.2
HLEHPEQQDGQLK		2.15953e-25	0.000276662	1	1	4	P07476	P07476 [509-521]		0	1558.76	729844	441440		1.91273e+06	794322	1.85315e+06	620522			942089				626807	1.57911e+06	448272	1.5907e+06		677605	1.73487e+06	160576	122643		223478	237082	239704	244572			345614				79225.2	268498	409396	854517
HLEEEEGQLK		1.14621e-09	0.000276662	1	1	3	P07476	P07476 [385-394]		0	1211.59	493719	532293	212864	1.26406e+06	491865	857873	337241	301455	72671.3	559824			501337	455685	1.51161e+06	265258	721875	384109	327431	768076	108625	147885	134859	147689	146808	110965	132920	95607.3	25010.2	205377			84635.3	57596.3	257021	242253	387787	174058
HLCAHGQCR	2xCarbamidomethyl [C3; C8]	1.76388e-11	0.000276662	1	1	14	Q14766	Q14766 [1128-1136]		0	1138.5	1.19347e+06	3.47459e+06	1.23303e+06	626464	5.1463e+06	1.99216e+06	3.92998e+06	924557	2.53268e+06	2.20395e+06		2.9044e+06	1.14361e+07	9.74067e+06	6.74199e+06	2.50196e+06	1.24198e+06	1.59152e+06	334727	4.90056e+06	262581	965330	781178	73194.1	1.53602e+06	257684	1.54896e+06	293226	871637	808539		790961	1.93064e+06	1.23117e+06	1.14635e+06	2.28498e+06	667187	721195
HLSISVVLK		6.29278e-05	0.000276662	1	1	12	P04275	P04275 [977-985]		0	995.625			838910		1.75635e+06		1.37573e+06	1.29472e+06	839292	1.23391e+06		3.45366e+06			152659	3.10012e+06	112587		2.15535e+06	348880			531488		524220		542228	410622	288847	452670		940543			25956.7	2.83126e+06	60481.2
LAEGFPLPLLK		1.71047e-08	0.000276662	1	1	4	P18428	P18428 [444-454]		0	1197.72	1.17372e+07	169609	626251		59870.3		213558	1.7417e+06	1.41763e+06	267846		2.69406e+06	72022.7	780296	6.88837e+06	4.51175e+07	2.03138e+06	2.56386e+06	3.44811e+06	3.04076e+06	2.58234e+06	47121.7	396759		17869.6		84171.8	552385	487885	98261.9		733679	12158.8	98625.4	1.17124e+06	4.12047e+07	1.09124e+06	1.16181e+06
LAELEEALQK		4.63669e-11	0.000276662	1	1	13	P13647	P13647 [432-441]		0	1143.63	7.81328e+06	6.71612e+06		3.19352e+07		9.35768e+06		998101	206213	118765					84874.8	220469	9.81156e+06	3.10383e+06	4.27862e+06	5.15684e+06	1.71903e+06	1865912		3.73121e+06		1.21041e+06		316550	70969.3	43570.1					14431.3	201349	5.27072e+06	1.40649e+06
LAELEEFINGPNNAHIQQVGDR		0.000967869	0.000276662	1	1	1	Q00610	Q00610 [1183-1204]		0	2464.22
LHLVSPADSGEYVCR	1xCarbamidomethyl [C14]	0.000126472	0.000276662	1	1	2	P98160	P98160 [2978-2992]		0	1702.82							61995.5			341999		166290				154913		663221	68852.6	174233							24434.9			125466		45286				141478		300537
IHLISTQSAIPYALR		5.51525e-12	0.000276662	1	1	8	P02679	P02679 [259-273]		0	1682.96	126619	210500	572435	334181	1.66027e+06	387036	292185	1.17004e+06	414342	646155		2.07018e+06			1.35073e+06	9.88954e+06	1.18598e+06	4.10043e+07	6.20193e+06	550029	27858	58482.3	362664	39044.6	495543	50062.9	115162	371079	142598	237048		563778			229666	9.03187e+06	637103	1.8581e+07
LHIIEVGTPPTGNQPFPK		5.59304e-12	0.000276662	1	1	6	Q00610	Q00610 [228-245]		0	1945.05		262794	125836		103252			271653				199327				334992	97227.5		514209	309451		73011	79722.7		30817.8			86155.3				54283.2				305939	52230.1
IHEGCEEPATHNALAK	1xCarbamidomethyl [C5]	7.18596e-22	0.000276662	1	1	2	Q00610	Q00610 [866-881]		0	1776.83	126931	789892	298272	315715	343780	71633.5	265030	733114	284797	311008		533704		386685	311262	804538	231119		1.44601e+06	889611	27926.6	219452	188969	36887.1	102608	9265.75	104459	232509	98014.6	114096		145345		48875	52924.1	734764	124156
LGVYELLLK		2.37827e-06	0.000276662	1	1	17	Q14624	Q14624 [154-162]		0	1047.64	1.67902e+06	6.48395e+06	2.35407e+07	115597	9.18415e+06	1.62419e+06	1.84522e+07	9.38429e+06	2.09685e+07	4.30444e+06		3.24666e+07		5.78341e+06	1.54065e+08	1.23492e+08	1.65461e+07	3.17062e+06	9589193	3.64561e+06	369407	1.80141e+06	14914089	13505.9	2.74121e+06	210088	7.27272e+06	2.97625e+06	7.21644e+06	1.57912e+06		8841694		730994	2.61959e+07	1.12782e+08	8.88847e+06	1.43676e+06
LGVRPSQGGEAPR		1.14259e-11	0.000276662	1	1	17	P02751	P02751 [1117-1129]		0	1323.71	1.69309e+07	2.62953e+07	1.17331e+07	1.98202e+07	2.18761e+07	2.25419e+07	1.87091e+07	1.6806e+07	2.00418e+07	2.14829e+07		1.06935e+07	3.37964e+07	1.57385e+07	1.89442e+07	2.46013e+07	9.15641e+06	6.88042e+07	1.31163e+07	3.51569e+07	3.72504e+06	7.30552e+06	7.43346e+06	2.31573e+06	6.52939e+06	2.91578e+06	7.37401e+06	5.33006e+06	6.89751e+06	7.88122e+06		2.91217e+06	5.70548e+06	1.98926e+06	3.22109e+06	2.24678e+07	4.91877e+06	3.11784e+07
IHQCISINMLADKLNMTPEEAER	1xCarbamidomethyl [C4]; 2xOxidation [M9; M16]	3.27724e-09	0.000276662	1	1	1	P60228	P60228 [347-369]		1	2745.3	4.0534e+06	966068	309192	877568	121622	291017			308171	571908						377019		496774	190038		891805	268399	195887	102532	36300.6	37642.8			106059	209810						344322		225112
LGVIEDHSNR		3.34149e-10	0.000276662	1	2	6	P14625	P14625 [494-503]		0	1139.58	471097	466651	149544	1.35307e+06	341710	551489	398594	660949	284021	359068	92842	1.23759e+06	958567	1.33085e+06	825752	1.65097e+06	921489	386902	495038	512351	103648	129648	94743	158088	101991	71334.8	157102	209621	97747.4	131728	3515.13	337037	161824	168213	140403	1.50778e+06	495019	175323
LGSLGAACEQTQTEGAK	1xCarbamidomethyl [C8]	3.46052e-19	0.000276662	1	1	11	P07357	P07357 [521-537]		0	1720.82	220208	657238		356778	881965	878464	887214	1.37753e+06	906806	994889		1.69347e+06	541779	312041	1.3416e+06	1.6626e+06	797367	1.18501e+06	1.31681e+07	1.4078e+06	48448.9	182598		41684.8	263241	113629	349686	436886	312082	364984		461186	91462.6	39440.4	228113	1.51841e+06	428341	536984
LGQYASPTAK		6.00771e-07	0.000276662	2	2	11	P0C0L4; P0C0L5	P0C0L4 [691-700]; P0C0L5 [691-700]		0	1035.55	2.37303e+06	4.50053e+06	2.14091e+06	872635	6.2616e+06	6.27698e+06	5.87059e+06	7.00824e+06	5.94077e+06	8.93515e+06		2.39228e+06		3.11144e+06	1.57602e+06	2.5795e+06	5.65664e+06	3.94202e+06	2.1648e+06	8.56918e+06	522100	1.25036e+06	1.35636e+06	101956	1.86891e+06	811924	2.31383e+06	2.22268e+06	2.04455e+06	3.27794e+06		651496		393271	267972	2.35579e+06	3038713	1.78631e+06
LGQGAHHAAGQAGK		9.79434e-12	0.000276662	1	1	9	Q6UWP8	Q6UWP8 [512-525]		0	1302.67	236519	193392		329399	1.51709e+06	892494	423762	676141	587379	447213		144491		1.57613e+06	479185	295856	613288			6.23013e+06	52037.4	53729.3		38485.9	452807	115444	167021	214440	202150	164064		39349.5		199215	81476.3	270198	329455
IGQDGISTSATTNLK		8.33117e-26	0.000276662	1	1	31	P04114	P04114 [1647-1661]		0	1505.78	2.72437e+07	1.7898e+07	6.34117e+07	3.08968e+06	9.28322e+06	2.64835e+06	2.99833e+07	1.29145e+07	3.44914e+07	2.06825e+07		3.50588e+07	2.25848e+07	3.4292e+07	1.58995e+07	4.653e+07	3.38386e+07	4.7101e+06	3.16829e+07	1.1295e+07	5993988	4.97251e+06	4.01742e+07	360988	2.77077e+06	342562	1.18176e+07	4.09585e+06	1.18704e+07	7.58758e+06		9.54765e+06	3.81275e+06	4.33434e+06	2.70341e+06	4.24947e+07	1.81779e+07	2.13437e+06
LGPNYLHIPVNCPYR	1xCarbamidomethyl [C12]	1.32864e-06	0.000276662	1	1	6	P04040	P04040 [366-380]		0	1812.92	197118	366411	167751	72507.3	272711	95904.7	1.3019e+06	441050	390785	264259		984295		290075	428443	902092	2.06705e+06	135875	324491	203967	43368.7	101798	106278	8471.52	81396.5	12405.2	513128	139880	134491	96945.8		268055		36664	72848.5	823858	1.11041e+06	61571.2
LGPLVEQGR		3.05877e-05	0.000276662	1	1	68	P02649	P02649 [199-207]		0	968.552	8.92601e+08	2.74266e+09	1.38589e+09	2.74562e+08	1.51492e+08	2.98347e+08	1.26842e+09	8.62691e+08	1.17728e+09	6.10103e+08	713423	5.2779e+08	1.77278e+08	4.03175e+08	1.48641e+08	7.75475e+08	1.29387e+09	4.61234e+08	8.73141e+08	1.04328e+09	1.96385e+08	7.61981e+08	8.78022e+08	3.20789e+07	45216014	3.8591e+07	4.99934e+08	2.73604e+08	4.05166e+08	2.23822e+08	27011.2	1.43734e+08	29927938	5.09592e+07	2.52736e+07	7.08222e+08	6.9506e+08	209006840
LGTPQQIAIAR		2.24003e-07	0.000276662	1	2	5	Q7L576	Q7L576 [1066-1076]		0	1167.68	239130							429900	333893			675582	1.42768e+06	1.09083e+06					166121	702873	52612							136344	114911			183983	241020	137875
LGPHAGDVEGHLSFLEK		2.98483e-15	0.000276662	1	1	3	P06727	P06727 [329-345]		0	1805.92			559208				566536	1.626e+06	508052	623195						366813			2.39164e+06				354284				223294	515691	174849	228625						335001
LHQPVVLTDHVVPLCLPER	1xCarbamidomethyl [C15]	0.000118713	0.000276662	1	1	1	P08709	P08709 [308-326]		0	2222.21													125119			75540.4																	21122.5			68989.1
LHSISSIDVNGGNR		0.000427851	0.000276662	1	1	5	P01130	P01130 [582-595]		0	1468.75	405805	511367		310154	74563.6	88254	316584	319693	367023	213785		162990			192607				472531		89282.8	142071		36237.4	22255.1	11415.6	124778	101391	126313	78429		44387.5			32749.2
IKQSELSAK		0.000600779	0.000276662	1	1	5	P02654	P02654 [55-63]		1	1003.58	2.53594e+06	1.22132e+07	8.31157e+06	450816	860749	650972	1.01469e+07	2.37873e+07	2.00451e+07	1.03368e+07		9.56444e+06			483459	1.79344e+06	1.83864e+07	989191	2.69461e+07	1.00952e+07	557943	3.39314e+06	5265759	52671.8	256909	84202.9	3.99929e+06	7.5442e+06	6.89864e+06	3.79215e+06		2.60471e+06			82203.1	1.6379e+06	9.87708e+06	448249
LKQNDFNSVEEK		0.000620689	0.000276662	1	1	1	P10643	P10643 [324-335]		1	1450.72	105044				132063		152014	93062.3							210466	193122	97096.5		923573		23111.1				39417.1		59914.9	29514.9							35785.6	176373	52159.7
LKQHIEAIDVR		2.65391e-14	0.000276662	1	1	15	P04114	P04114 [2285-2295]		1	1321.76	2.53674e+06	4.18569e+06	1.91732e+07	1.19317e+06	2.14655e+06		7.86295e+06	8.03956e+06	1.46724e+07	8.72477e+06		6.28716e+06	4.65359e+06	5.36509e+06	1.77268e+06	1.80544e+07	9.52654e+06	218620	12238063	4.73501e+06	558119	1.16289e+06	12147071	139406	640684		3.0991e+06	2.54976e+06	5.04959e+06	3200765		1.7122e+06	785615	678120	301410	16488616	5.1176e+06	99067.1
LKPGAPLRPK		5.7473e-05	0.000276662	1	1	2	P21333	P21333 [269-278]		0	1076.69		103497	34559.8	53291.4	100381	67661.8	286759	117181	80121.8	56599.9			1.28762e+06	1.58591e+06	496834	244570	91442.6		201935	298487		28754.1	21895.2	6226.39	29960.9	8752.01	113023	37164.3	27574.4	20764.2			217374	200451	84477.1	223360	49122.5
LKPEDITQIQPQQLVLR		5.78563e-06	0.000276662	1	1	2	P05556	P05556 [106-122]		0	2019.16	124636	462967	920463		605597		858725	1.18063e+06	966902	612823		1.5133e+06		1.07859e+06	828391	940582	884707		450122	352150	27421.6	128624	583156		180753		338457	374440	332765	224820		412122		136329	140852	859009	475260
LKKPVAFSDYIHPVCLPDR	1xCarbamidomethyl [C15]	0.00117602	0.000276662	1	1	1	P00734	P00734 [468-486]		1	2255.2			91516.2													581644			418619				57979.7													531201
IHSGSFQSQVELSNDQEK		3.90118e-23	0.000276662	1	1	41	P04114	P04114 [3639-3656]		0	2032.96	4.90869e+07	4.39209e+07	2.04381e+08	1.24372e+07	2.79991e+07	4.36606e+06	5.46688e+07	4.77059e+07	7.89322e+07	5.59172e+07	996738	1.15667e+08	638158	4.9548e+07	2.10658e+07	2.22561e+08	6.95387e+07	2.08423e+07	1.15095e+08	2.56201e+07	1.07998e+07	1.22024e+07	1.29485e+08	1.45313e+06	8.35694e+06	564747	2.15471e+07	1.513e+07	2.7165e+07	2.05137e+07	37737.9	3.14999e+07	107733	6.26262e+06	3.58184e+06	2.03259e+08	3.73558e+07	9.44463e+06
IKFEMEQNLR		7.08765e-09	0.000276662	1	1	11	P35527	P35527 [241-250]		1	1307.68	2.45093e+06	2.50463e+06	2.78241e+06	4.46111e+06	3.86333e+06	8.55091e+06	3.87273e+06	4.69298e+06	6.45265e+06	2.50465e+06		1.41469e+06	1.62375e+06	5.13416e+06	5.32311e+06	2.53405e+06	1.71792e+06	1.20002e+06	1.0192e+06	1.47778e+06	539239	695852	1.76278e+06	521222	1.15309e+06	1.10606e+06	1.5264e+06	1.48839e+06	2.22071e+06	918853		385265	274119	648931	905093	2.31428e+06	922856	543784
LKEFGNTLEDKAR		1.81257e-16	0.000276662	1	1	6	P02654	P02654 [37-49]		2	1520.81		1.58579e+06	1.21362e+06	63652.3		54758.8	1.44836e+06	2.36922e+06	1.95248e+06	1.34046e+06						400959	3.64261e+06	395838	4.67872e+06	2.31124e+06		440574	768886	7436.93		7083.02	570854	751403	671958	491759						366186	1.95679e+06	179373
LKEFGNTLEDK		9.79041e-08	0.000276662	1	1	14	P02654	P02654 [37-47]		1	1293.67	7.97107e+06	1.73865e+07	1.63814e+07	1.0155e+06	1.95388e+06	3.60766e+06	1.94532e+07	2.60044e+07	2.55266e+07	1.66276e+07		1.99364e+07	4.24689e+06	3.1006e+06	2.82392e+06	1.91639e+06	3.73181e+07	1.61168e+06	4.08223e+07	1.42726e+07	1.75375e+06	4.83042e+06	1.03784e+07	118648	583177	466649	7.66727e+06	8.24736e+06	8.78511e+06	6.09998e+06		5.42934e+06	716956	391901	480154	1.75019e+06	2.00471e+07	730330
LKEEIGKELEELR		2.99186e-18	0.000276662	1	1	12	P06727	P06727 [98-110]		2	1585.88		425031	3.09307e+06					2.93049e+06					33792.3			1.45857e+06	124960		4.37983e+06	499130		118085	1.9596e+06					929410					5704.79			1.33207e+06	67127.9
LKECCEKPLLEK	2xCarbamidomethyl [C4; C5]	2.69567e-22	0.000276662	1	1	15	P02768	P02768 [299-310]		1	1546.8	4.9621e+07	6.60939e+07	4.40027e+07	5.68411e+07	2.76218e+08	3.01126e+08	4.41328e+08	3.77183e+08	2.10234e+08	3.44617e+08	784076	1.33849e+06	5.50928e+07	7.82185e+07	3.60841e+07	4.58295e+07	3.77255e+08	3.98223e+08	205549816	9.95158e+08	10917306	1.83626e+07	27877736	6.64113e+06	8.24431e+07	3.89505e+07	1.73945e+08	1.19625e+08	7.2353e+07	1.26426e+08	29686.2	364514	9300713	9886420	6.13541e+06	41854912	2.0266e+08	1.80454e+08
LKDVLLQVDDERR		0.000179483	0.000276662	1	1	1	P35579	P35579 [1844-1856]		2	1598.89		306847	155968				185356	435852	182297			395893				202948	77131.8	394218	503012	152917		85249.9	98812.6				73056.2	138232	62738.5			107814				185347	41434.8	178639
LHTEAQIQEEGTVVELTGR		4.48438e-28	0.000276662	1	1	26	P01023	P01023 [320-338]		0	2110.08		4.31585e+06	1.06227e+07	2.53342e+06	5.73924e+06	3.22819e+06	5.18469e+06	4.9429e+06	5.53624e+06	1.28244e+07		1.39142e+07		1.72582e+06	9.03196e+06	1.22532e+07	1.19805e+06	3.05577e+06	9858024	1.61839e+06		1.19906e+06	6.72996e+06	295997	1.713e+06	417565	2.04349e+06	1.56765e+06	1905327	4.70474e+06		3.78929e+06		218135	1.53571e+06	1.11905e+07	643587	1.38471e+06
LKEVHEQLLSTEQVSDQK		1.92751e-17	0.000276662	1	1	12	Q13201	Q13201 [513-530]		1	2111.1	1.8961e+06	6.09233e+06	2.9628e+06	1.87596e+06	5.21289e+06	1.57749e+06	7.30594e+06	1.36701e+06	3.70308e+06	2.25903e+06		1.19924e+07		3.98646e+06	5.75434e+06	5.00077e+06	1.2769e+06		7.74819e+06	9.64163e+06	417169	1.69261e+06	1.87707e+06	219181	1.5559e+06	204048	2.87956e+06	433552	1.27444e+06	828746		3.26592e+06		503868	978415	4.56708e+06	685944
LKTQFNNNEYSQDLDAYNTK		1.90815e-10	0.000276662	1	1	3	P04114	P04114 [1983-2002]		1	2406.12	251280															258500					55285.1															236082
IGNTGGMLDNILASK		1.31855e-09	0.000276662	1	1	1	P53396	P53396 [636-650]		0	1503.78																354660	77430.3																			323902	41595.1
IGNCPFSQR	1xCarbamidomethyl [C4]	0.000345048	0.000276662	1	1	3	O00299	O00299 [21-29]		0	1078.51	115849	312820	200997		131868	191922	387810	427842	718388	174574				424647	186520	407197	436599	192303	303702	475452	25488.4	86909.5	127341		39358.8	24825	152851	135691	247237	64044.2				53673.3	31714.2	371882	234538	87141.5
IGASTLLSDIER		1.82962e-10	0.000276662	1	1	7	Q9Y315	Q9Y315 [288-299]		0	1274.7		165888	447641		198137		193693	176978	204277	240909		125272		87170.1	157554	484436	298725		517011	99643.1		46088	283601		59138.2		76342	56129	70303	88379.6		34115.6		11017.9	26789	442423	160473
LGASQGSDTSTSR		1.10804e-05	0.000276662	1	1	1	Q92959	Q92959 [7-19]		0	1266.59					69437.6			50433.7	131473	86334.2		58294.2		67788.7		161899				207012					20725.1			15995.2	45247.2	31672.5		15875.4		8568.14		147858
LGAPQQPGPGPPPSR		4.63733e-07	0.000276662	1	1	5	Q96CX2	Q96CX2 [129-143]		0	1455.77	1.71542e+06	1.83653e+06	738584	331833	399582	662549	647281	177213	693194	531929				206001	394665	1.21976e+06	1.99499e+06	42621.1	1.57886e+06	561222	377416	510236	467927	38770.3	119264	85700.3	255119	56203.7	238567	195143				26037.5	67105.2	1.11398e+06	1.0717e+06	19313.6
LGADMEDVCGR	1xCarbamidomethyl [C9]; 1xOxidation [M5]	2.76781e-14	0.000276662	1	1	149	P02649	P02649 [122-132]		0	1238.51	5.12969e+07	1.51997e+08	1.05914e+08	5.83819e+06	1.17641e+07	2.3514e+07	1.00375e+08	7.42638e+07	8.01549e+07	4.1001e+07		3.42461e+07	6.73021e+06	3.21494e+07	1.45682e+07	7.41389e+07	1.43924e+08	4.159e+07	5.3683e+07	9.75517e+07	1.1286e+07	4.22286e+07	6.71015e+07	682115	3.51125e+06	3.04152e+06	3.95617e+07	2.35529e+07	2.75858e+07	1.50416e+07		9.32632e+06	1.13619e+06	4.06352e+06	2.47704e+06	6.77091e+07	7.73149e+07	1.88464e+07
LGADMEDVCGR	1xCarbamidomethyl [C9]	4.21338e-14	0.000276662	1	1	40	P02649	P02649 [122-132]		0	1222.52	1.32093e+08	3.547e+08	2.82469e+08	1.04422e+07	2.42805e+07	2.56035e+07	2.73465e+08	2.46142e+08	1.77291e+08	8.64996e+07	1.13793e+07	8.49037e+07	1.01336e+08	4.61845e+07	1.89159e+07	3.36473e+08	4.53668e+08	1.14715e+08	2.11363e+08	1.61711e+08	2.90623e+07	9.85448e+07	1.78957e+08	1.22003e+06	7.24703e+06	3.31179e+06	1.07783e+08	7.80644e+07	6.10157e+07	3.17332e+07	430835	23122024	17107440	5.83749e+06	3.21629e+06	3.07292e+08	2.43708e+08	5.19828e+07
LGAASLGAEDPETQVVLINAVK		1.36548e-18	0.000276662	1	1	4	Q9Y490	Q9Y490 [2064-2085]		0	2195.19	107680	279670	303243		452519	139604	710952	826369	272063	144236		3.72125e+06		1.82024e+06	1.61255e+06	572467	230529		453676	219333	23691.1	77699.5	192119		135064	18057.7	280214	262085	93632.1	52914.3		1.01342e+06		230070	274183	522820	123839
IGCNTCVCQDR	3xCarbamidomethyl [C3; C6; C8]	1.73391e-13	0.000276662	1	1	8	P04275	P04275 [844-854]		0	1382.56			6.77517e+07	106906	36395.7	80710.3	1.48469e+08	21498.4	650451	26222.5						106397	8.56714e+07			3.09032e+06			4.29238e+07	12490.5	10863.1	10439.8	5.85176e+07	6818.28	223856	9619.95						97170.1	4.60222e+07
IFYNQQNHYDGSTGK		4.38405e-11	0.000276662	1	1	8	Q15848	Q15848 [135-149]		0	1771.8	5.40179e+06	1.23196e+06	2.17971e+06	536517	2.65248e+06	615338	5.1488e+06	2.00006e+06	2.04246e+06	2.22698e+06		722337	3.45997e+06	737787	5.81654e+06	3.42335e+06	5.00347e+06	1.03836e+06	8.3957e+06	2.12204e+06	1.18847e+06	342270	1.38095e+06	62685	791689	79593.6	2.02935e+06	634322	702926	816988		196716	584108	93252.6	988993	3.12645e+06	2.68784e+06	470530
IFSQETLTK		0.000241359	0.000276662	1	1	8	Q9UHG3	Q9UHG3 [407-415]		0	1066.58	1.38036e+06	5.09908e+06	5.08124e+06	355901	439428	439370	2.81757e+06	1.27112e+06	2.81016e+06	975063		2.16805e+06	3.65741e+06	1.4739e+06	596189	5.13204e+06	7.14804e+06		2255182	960683	303698	1.41666e+06	3.2192e+06	41582.3	131157	56832.3	1.11052e+06	403139	967134	357711		590431	617440	186293	101371	4686963	3.83989e+06
IFQNDMQETVAQLFK	1xOxidation [M6]	1.99174e-07	0.000276662	1	1	3	Q13201	Q13201 [397-411]		0	1827.89		226600	297009		272743		399291		165579	201349		768516		214845	272640	333834			385032	133972		62955.2	188169		81406		157376		56985	73866.8		209292		27155.3	46357.2	304882
LFINVAPHAR		6.01441e-05	0.000276662	1	1	13	Q76LX8	Q76LX8 [1327-1336]		0	1137.65	371709	8.03288e+06	360335	1.50994e+06	7.90601e+06	910732	5.53384e+06	3.64623e+06	1.15677e+06	3.57099e+06		5.47528e+06		564992	813568	176593	5.52676e+06	367917	2.87335e+06	1.66816e+06	81781.1	2231742	228289	176416	2.35972e+06	117803	2.18111e+06	1.15641e+06	398108	1.31005e+06		1.4911e+06		71412.1	138332	161278	2.96894e+06	166720
LFLEPTQADIALLK		6.99267e-17	0.000276662	1	1	21	P08519	P08519 [4404-4417]		0	1571.9			1.23115e+08	1.7397e+06		1.15426e+06	2.18897e+07	2.73404e+07		9.08567e+06				1.89413e+07	2.069e+07	1.48784e+07	1.53135e+07		24771032	1.75895e+06			77998792	203261		149303	8.62759e+06	8671067		3.33316e+06				2.39408e+06	3.51793e+06	13588070	8.22631e+06
IFEGNTNTK		0.000106718	0.000276662	1	1	5	P12259	P12259 [2177-2185]		0	1023.51	446991	2.48128e+06	1.1571e+06	300631	610825	942003	5.49308e+06	855217	2.63456e+06	2.31146e+06	340630	2.65037e+06	349431	1.12475e+06	759663	568850	945575		2.23328e+06	1.25576e+06	98344.4	689364	733079	35124.7	182314	121848	2.16504e+06	271234	906699	847981	12896.7	721782	58990.6	142162	129166	519516	507957
LFDSDPITVTVPVEVSR		1.62929e-17	0.000276662	1	1	9	P10909	P10909 [409-425]		0	1873.99		481568	6.38206e+06	1.06905e+06	2.48417e+06	2.12379e+06	822355	3.41625e+06	552540	854879				277794	1.96092e+06	1.03659e+07	333208	1.01537e+06	6.3992e+06	462602		133792	4.04333e+06	124904	741455	274711	324123	1.08347e+06	190160	313620				35111.7	333416	9466925	178998	460111
LFVSGACDASAK	1xCarbamidomethyl [C7]	1.59914e-11	0.000276662	1	1	7	P62873	P62873 [198-209]		0	1225.59	1.21904e+06	1.38096e+06	1.20639e+06		863076	1.39796e+06	1.65769e+06	3.74412e+06	2.20472e+06	1.15147e+06		1.53316e+06		1.53954e+06	1.0073e+06	2.12617e+06	2.18975e+06	327360	741416	2.90827e+06	268207	383667	764303		257604	180825	653362	1.18746e+06	758768	422429		417528		194590	171271	1.94177e+06	1.17632e+06	148342
LGNQEPGGQTALK		9.16078e-10	0.000276662	1	1	5	P08697	P08697 [52-64]		0	1312.69	1.3853e+06	1.22364e+06	1.42224e+06	1.75034e+06	3.03761e+06	2.23897e+06	1.51432e+06	1.8678e+06	1.00413e+06	1.18884e+06		1.08943e+06		715686	1.48725e+06	4.24031e+06	990048		1.6391e+06	1.89787e+06	304785	339959	901056	204504	906638	289610	596853	592376	345577	436138		296686		90459	252878	3.87257e+06	531848
IGCNTCVCQDRK	3xCarbamidomethyl [C3; C6; C8]	7.52247e-06	0.000276662	1	1	1	P04275	P04275 [844-855]		1	1510.66			133807				923501										349641						84773				363988										187825
LGDQGPPEEAEDR		1.87935e-05	0.000276662	1	1	5	O00592	O00592 [445-457]		0	1412.63	451953	182029	281194		332597	372835	322287	286028	397880	466782		184596	897430	233855	216274	497515	161366	447962	73772	725525	99436	50572.5	178149		99270.6	48225.9	127026	90714.5	136932	171243		50271.5	151503	29558.1	36773.2	454367	86684.7	202993
LGMFNIQHCK	1xCarbamidomethyl [C9]; 1xOxidation [M3]	0.000158894	0.000276662	1	1	4	P01009	P01009 [248-257]		0	1263.6	800945	1.64478e+06	1.60233e+06	1.52481e+06	2.96093e+06	4.28282e+06	7.6335e+06	5.38344e+06	3.57874e+06	5.89285e+06				1.3895e+06	3.00019e+06	8.41129e+06	1.27534e+07	1.9616e+07	1.149e+07	1.77529e+07	176219	456964	1.01515e+06	178154	883753	553981	3.00867e+06	1.70737e+06	1.23164e+06	2.16185e+06				175626	510126	7.68182e+06	6.85106e+06	8.88892e+06
IGITNHDEYSLVR		4.53316e-12	0.000276662	1	1	9	Q9Y490	Q9Y490 [119-131]		0	1516.78							677292	525027				1.70605e+06	1.20434e+06	1.85421e+06	1.12234e+06	553367	495126		500029	1.16051e+06							266947	166513				464613	203315	234362	190832	505376	265979
LGILDFTEQDVASHQSYSQK		1.91253e-13	0.000276662	1	1	5	P28906	P28906 [270-289]		0	2266.1	166527	391156	1.00297e+06		1.30892e+06	562192	846698	1.23163e+06	1.57166e+06	1.56404e+06		840732		150604	344791	1.87681e+06	588739		418811	184017	36638.3	108673	635428		390675	72719.2	333717	390613	540896	573784		228958		19035.6	58625.1	1.71405e+06	316267
IGLDLAALNMQR		0.00141003	0.000276662	1	1	1	P11678	P11678 [551-562]		0	1314.72			25812.2		45296.7			239915								101202	14866.1	46251.7					16353.2		13519.8			76089.5								92425.3	7986.01	20958.8
LGHPDTLNQGEFK		4.67668e-10	0.000276662	1	1	18	P06702	P06702 [26-38]		0	1455.72	5.39798e+06	3.94046e+06	2.67359e+06	5.4096e+06	5.39844e+06	1.40263e+07	5.20499e+06	9.14775e+06	4.17137e+06	1.24357e+07		5.44718e+06	1.5081e+07	9.12873e+06	3.87063e+06	2.62631e+06	5.7072e+06	1.38409e+07	3.19587e+06	1.19589e+07	1.18763e+06	1.09476e+06	1.69384e+06	632041	1.61128e+06	1.81429e+06	2.05149e+06	2.90123e+06	1.4356e+06	4.56216e+06		1.48344e+06	2.54595e+06	1.15382e+06	658127	2.39854e+06	3.06587e+06	6.27199e+06
IGGIGTVPVGR		1.35601e-09	0.000276662	1	3	13	Q05639	Q05639 [256-266]		0	1025.61	2.52003e+06	1.30042e+06	620379	2.7129e+06	904705	2.31974e+06	1.32719e+06	1.96363e+06	2.36734e+06	979229		4.37268e+06	1.86244e+06	2.13972e+06	1.17792e+06	1.19733e+06	706392		680672	2.21905e+06	554443	361291	393039	316967	270028	300057	523096	622769	814732	359239		1.19082e+06	314415	270450	200283	1.09349e+06	379470
LGDLYEEEMR		4.91952e-09	0.000276662	1	1	4	P08670	P08670 [146-155]		0	1254.57
IGFGSFVEK		6.95523e-06	0.000276662	1	1	6	P05556	P05556 [182-190]		0	983.52	573210	1.07892e+06	738023	382762	944174	1.32329e+06	1.01667e+06	1.87089e+06	1.62566e+06	1.35315e+06		1.77024e+06		3.40689e+06	1.59796e+06	1.21445e+06	2.06077e+06		591756	2.11026e+06	126114	299753	467572	44720.6	281809	171167	400710	593356	559480	496415		482093		430613	271703	1.10913e+06	1.10703e+06
LGEVNTYAGDLQK		2.15606e-17	0.000276662	1	1	16	P06727	P06727 [66-78]		0	1407.71	4.94915e+06	8.43393e+06	5.31309e+06	890642	2.76167e+06	3.29936e+06	4.94016e+06	1.10594e+07	5.55433e+06	6.51006e+06		1.08148e+07	1.37977e+06	1.57484e+06	2.01996e+06	1.90299e+06	4.69412e+06	956849	9942283	2.24138e+07	1.08888e+06	2.34316e+06	3.36608e+06	104060	824279	426770	1947113	3507530	1.91155e+06	2388278		2.94521e+06	232932	199051	343455	1.73796e+06	2.52166e+06	433594
IGESIELTCPK	1xCarbamidomethyl [C9]	4.84687e-14	0.000276662	1	1	14	P13671	P13671 [724-734]		0	1246.63	678743	1.18009e+06	680369	984531	1.92171e+06		1.41381e+06	2.32766e+06	1.10269e+06	2.26714e+06		3.56158e+06		782219	1.70208e+06	2.26864e+06	1.56651e+06	2.55595e+06	9262464	1.73409e+06	149333	327858	431045	115029	573575		557237	738223	379496	831722		969933		98868.4	289406	2.07189e+06	841521	1.15822e+06
LGEPNYGAEIR		2.47653e-09	0.000276662	1	1	13	P13611	P13611 [1912-1922]		0	1218.61	2.30835e+06	2.63476e+06	925299	2.32243e+06	1.44604e+06	4.78268e+06	2.6958e+06	3.43429e+06	2.32019e+06	2.46047e+06		1.69002e+06	8.70975e+06	5.5773e+06	2.39435e+06	2.05562e+06	1.11964e+06	1.42309e+06	2.46582e+06	9.57196e+06	507870	732005	586219	271345	431601	618637	1.06252e+06	1.08919e+06	798507	902645		460246	1.47037e+06	704942	407113	1.87734e+06	601464	644869
LGELTVTDR		1.80511e-06	0.000276662	1	1	15	P22105	P22105 [1065-1073]		0	1003.54	705826	518830	374078	200998	830731	1.1315e+06	560220	551141	351654	1.3201e+06		728765		448306	287572	581218	389839	813453	625309	1.67104e+06	155292	144144	236996	23483.9	247949	146359	220805	174796	121024	484290		198466		56663.6	48896.1	530812	209419	368614
LGEFWLGNDNIHALTAQGTSELR		2.18321e-27	0.000276662	1	1	8	Q15485	Q15485 [170-192]		0	2542.27					320980		331252			687311									1.62215e+06						95803.3		130559			252147
LGDVYVNDAFGTAHR		0.000198375	0.000276662	1	2	6	P00558	P00558 [157-171]		0	1634.79		357745	304135					686761	749834	165661		1.05222e+06				224083	239813		184339	811624		99390.9	192684					217808	258059	60774.4		286554				204649	128826
IGFGPDPTFSSCVPDPPVISEEK	1xCarbamidomethyl [C12]	3.50384e-11	0.000276662	1	1	3	Q14766	Q14766 [654-676]		0	2475.17		455653			1.66599e+06	370771	597390		649285	495995		1.41184e+06		420416	1.50383e+06	528193	161500		359556			126592			497251	47959	235455		223455	181960		384490		53138.4	255698	482386	86757
IFDDSPCPFTAK	1xCarbamidomethyl [C7]	1.4957e-09	0.000276662	1	1	11	Q8IWA5	Q8IWA5 [395-406]		0	1397.64	763145	1.90324e+06	1.03671e+06				1.90574e+06	1.78049e+06	1.05152e+06	908914		710683		965736		605091	274690	55121.3	781480	1.75588e+06	167903	528769	656803				751126	564687	361887	333444		193542		122064		552614	147562	24978.1
LKYENEVALR		3.05877e-05	0.000276662	1	1	7	P13645	P13645 [236-245]		1	1234.68	1.67198e+08	1.23646e+08	8.23753e+07	8.47286e+08	8.27932e+07	2.7224e+08	1.0533e+08	9.30954e+07	1.17968e+08	6.39796e+07	170748	6.11368e+06		4.50095e+08	1.31706e+08	3.14436e+07	9.60333e+07	5.94056e+06	5.73245e+07	1.26111e+08	3.67859e+07	3.4352e+07	52188504	9.89942e+07	24711386	3.52141e+07	4.15148e+07	2.95254e+07	4.05993e+07	2.34715e+07	6464.75	1.66495e+06		5.68898e+07	22394149	28716600	5.15885e+07	2.69195e+06
LLADQAEAR		3.57732e-06	0.000276662	1	1	7	P84098	P84098 [154-162]		0	986.527	863386	623124	115406	6.28985e+06	478947	1.09851e+06	840261	844172	590116	462496		1.01912e+06			923223	393240	311880	554102	268330	1.00568e+06	189957	173120	73114.9	734886	142952	142092	331180	267731	203092	169671		277539			156977	359136	167540	251090
LLLQQVSLPELPGEYSMK		8.06903e-15	0.000276662	1	1	4	P01023	P01023 [1298-1315]		0	2045.1							733127			2.51619e+06					1.28985e+06	3.65338e+06	148785		1.32524e+06								288954			923090					219314	3.33654e+06	79926.2
LLLQMDSSATAYGSTVSK	1xOxidation [M5]	1.03027e-10	0.000276662	1	1	17	P04114	P04114 [1146-1163]		0	1887.94	2.9529e+06	2.25398e+06	6.47037e+06	2.70242e+06	901830		3.38038e+06	1.55936e+06	3.94512e+06	2.46976e+06		4.59998e+06	3.45708e+06	2.53925e+06	3.85521e+06	7.6969e+06	3.20639e+06		2.9678e+06	2.5386e+06	649679	626215	4.09928e+06	315742	269170		1.33234e+06	494554	1.35773e+06	906054		1252724	583621	320949	655505	7.02938e+06	1.72245e+06
LLLQMDSSATAYGSTVSK		5.86489e-13	0.000276662	1	1	18	P04114	P04114 [1146-1163]		0	1871.94			4.79589e+06	1.39398e+06	394079		1.74055e+06	1.77356e+06	1.53871e+06	1.70026e+06		5.02785e+06		404851	1.50053e+06	1.07677e+07	781185	287986	3.66e+06	668428			3.03841e+06	162868	117621		686019	562487	529554	623755		1.36925e+06		51171.1	255137	9.83387e+06	419648	130500
ILLQGTPVAQMTEDAVDAER	1xOxidation [M11]	3.42298e-17	0.000276662	1	1	16	P01024	P01024 [980-999]		0	2173.08	562085	1.12608e+06	1.96655e+06	900619	1.50743e+06	1.43473e+06	2.21476e+06	6.05399e+06	2.76615e+06	3.03249e+06	133251	192734	1.16066e+06	844441	3.9412e+06	5.27632e+06	1.51519e+06	2.78445e+06	6.85459e+06	767744	123667	312855	1.2459e+06	105225	449923	185581	872923	1.92004e+06	951985	1.1125e+06	5045.07	52487.8	195942	106733	670127	4.81873e+06	813954	1.26177e+06
ILLQGTPVAQMTEDAVDAER		3.10329e-17	0.000276662	1	1	10	P01024	P01024 [980-999]		0	2157.09		152870		254784	989980	639107	1.517e+06	4.01813e+06	1.24317e+06	2.38569e+06		5.51645e+06		178371	2.24007e+06	5.44651e+06	1.21793e+06		9084602	344723		42471.2		29768.1	295481	82668.2	597908	1.27436e+06	427845	875213		1.50231e+06		22545.2	380881	4.97416e+06	654263
LLLNNDNLLR		5.20405e-06	0.000276662	1	2	13	P47755	P47755 [38-47]		0	1197.69	161030	443784	293140	416897	393980	474565	653011	1.71631e+06	1.14057e+06	326489		1.20896e+06	1.63035e+06	750824	519674	375261	557503	609336	267369	925024	35428.9	123295	185717	48708.9	117592	61384.7	257377	544332	392533	119776		329238	275234	94900.3	88360.7	342716	299488	276119
LLLQQVSLPELPGEYSMK	1xOxidation [M17]	2.5507e-17	0.000276662	1	1	13	P01023	P01023 [1298-1315]		0	2061.09					676813	441000	3.29771e+06	106856	30788.8	2.92177e+06					3.78518e+06	1.55813e+06	48013	1.50334e+06	2.68031e+06						202009	57043.1	1.29976e+06	33889.6	10596.1	1.07188e+06					643598	1.423e+06	25792.3	681236
LLLNAENPR		0.000491497	0.000276662	1	1	1	P12931	P12931 [164-172]		0	1039.59													1.55856e+06																				263114
LLLLGAGESGK		1.69666e-09	0.000276662	1	12	14	P04899	P04899 [36-46]		0	1057.63	1.48268e+06		1.09244e+06					9.12917e+06	5.40493e+06	3.43876e+06		2.86824e+06	5.31316e+06	3.88746e+06		1.92939e+06	794316		839678	7.19166e+06	326210		692109					2.89534e+06	1.86014e+06	1.26154e+06		781114	896963	491355		1.76206e+06	426702
LLLGSNQNEIVSLK		1.40974e-11	0.000276662	1	1	2	Q86SQ4	Q86SQ4 [291-304]		0	1527.87	54835.8	249806	215940					161443		126449		240142			88940.6	381904	150003			55299.8	12064.6	69402.6	136808					51202		46389		65398.3			15122.7	348784	80580.7
ILLAELEQLK		1.87793e-07	0.000276662	1	1	2	P08670	P08670 [130-139]		0	1169.71	56167.8	134403	106466	349891	925055	181188	145427	1.94919e+06	264669	151668	4.50341e+07	1.42881e+06		50277	227649	732996	335703		384383	155145	12357.7	37340.7	67451.3	40880.1	276102	23436.6	57318.5	618190	91087.1	55640.7	1705054	389112		6354.75	38707.4	669426	180338
ILGLAIESQDAGIK		1.39794e-07	0.000276662	1	1	8	O00161	O00161 [27-40]		0	1427.81	213854	181628	180990		143946	207993	115178	798391	389273	238192		409988	732029	616690		165722	119176		124497	377294	47050.9	50460.9	114666		42963.7	26903.8	45396.3	253212	133970	87382.9		111653	123580	77946.5		151350	64020.9
ILGGHLDAK		6.88494e-05	0.000276662	2	2	11	P00739; P00738	P00739 [104-112]; P00738 [162-170]		0	923.531	6.67849e+06	6.89486e+06	1.11994e+07	1.87322e+07	1.37026e+07	6.70092e+06	6.81549e+06	9.30884e+06	8.44132e+06	8.95849e+06		3.25979e+07	1.83284e+07	1.40747e+07	6.95822e+07	1.78581e+07	1.23153e+07	1.2492e+07	29373186	1.04595e+07	1.46936e+06	1.91557e+06	7.09536e+06	2.18861e+06	4.08984e+06	866761	2.68625e+06	2.95232e+06	2.90513e+06	3.2865e+06		8.87747e+06	3.09418e+06	1.77897e+06	1.18311e+07	1.63094e+07	6.61573e+06	5660734
LLGEVDHYQLALGK		1.23703e-23	0.000276662	1	1	15	O75636	O75636 [200-213]		0	1555.85	4.03761e+06	5.72376e+06	1.33374e+07	6.04752e+06	1.54237e+07	5.86793e+06	4.58924e+06	4.28061e+06	1.09318e+07	8.27512e+06		1.80754e+06		1.97558e+06	2.48576e+07	2.18875e+07	5.25968e+06	5.05583e+06	1.2339e+07	2.40109e+06	888331	1.59021e+06	8.44987e+06	706573	4.60353e+06	759014	1.8088e+06	1.35761e+06	3.76223e+06	3.03581e+06		492252		249703	4.22656e+06	1.99893e+07	2.82547e+06	2.29104e+06
LLLIGDSGVGK		7.05836e-11	0.000276662	3	9	13	P61026; P59190; Q92930	P61026 [12-22]; P59190 [11-21]; Q92930 [11-21]		0	1071.64	1.35895e+06	2.02853e+06	660968	1.99022e+06	828425	1.83786e+06	311575	2.96752e+06	1.82228e+06	545219		2.44777e+06	2.95185e+06	4.03583e+06	1.60364e+06	1.10511e+06	672469	614993	833511	3.04445e+06	298987	563579	418754	232530	247261	237726	122804	941155	627149	200019		666607	498329	510108	272668	1.00927e+06	361247	278682
ILGEELGFASLHDLQLLGK		2.81587e-30	0.000276662	1	1	6	P04114	P04114 [779-797]		0	2053.13	2.11064e+06			1.59857e+06		4.5829e+06								1.83062e+06			1.29374e+06			2.34096e+06	464370			186772		592796								231382			694992
LLLSSETPIEGK		1.17019e-07	0.000276662	1	1	3	Q9HDC9	Q9HDC9 [184-195]		0	1286.72								149172				251419			181710	1.18401e+06	398066		214247	172982								47310.3				68469.6			30896.3	1.08132e+06	213839
LLIYAASSLQSGVPSR		2.89561e-12	0.000276662	2	4	16	P04432; A0A0C4DH73	P04432 [68-83]; A0A0C4DH73 [68-83]		0	1661.92	334060	427516	3.35807e+06	507683	1.4804e+06	692218	975486	1.51768e+06	511402	3.02783e+06		8.81948e+06		96788.1	1.81582e+06	4.18105e+06	187368	410139	3.68481e+06	306894	73498	118775	2.12749e+06	59316.1	441857	89538.1	384478	481336	176002	1.11079e+06		2.40183e+06		12233.5	308745	3.81844e+06	100653	185853
IIPGFMCQGGDFTR	1xCarbamidomethyl [C7]; 1xOxidation [M6]	0.000727849	0.000276662	1	2	4	P62937	P62937 [56-69]		0	1614.74	129461	242466	112287			188469	364931	486241	408993	246411		652964	1.35521e+06	748146	452652	396050	288362	76069	347667	351791	28483.2	67363.3	71138.7			24378.3	143834	154212	140757	90398.1		177823	228785	94561.9	76964.8	361703	154906	34470.5
IIPGFMCQGGDFTR	1xCarbamidomethyl [C7]	1.60421e-09	0.000276662	1	2	8	P62937	P62937 [56-69]		0	1598.75		190824					348137	1.03267e+06	318990	188088		956962	1.02071e+06	350929	270220	578500	311819	27055	492394	436634		53015.9					137214	327515	109782	69001.7		260612	172315	44355.7	45945.8	528329	167507	12259.9
LLPAQLPAEK		0.000155672	0.000276662	1	1	11	Q16610	Q16610 [91-100]		0	1079.65	1.48364e+06	2.1454e+06	583127	1.59943e+06	1.96044e+06	3.00174e+06	1.72732e+06	1.54646e+06	2.12261e+06	2.27606e+06		1.20891e+06		1.14693e+06	1.35326e+06	1.02947e+06	976029	2.40116e+06	845296	4.39448e+06	326422	596047	369438	186873	585134	388273	680804	490463	730507	834992		329225		144966	230096	940190	524317	1088077
ILNIFGVIK		3.97021e-05	0.000276662	1	1	8	P02786	P02786 [386-394]		0	1016.65																1.37993e+06			5.61696e+06	432786																1.26025e+06
IINEPTAAAIAYGLDKR		1.31855e-09	0.000276662	1	1	4	P11021	P11021 [198-214]		1	1816	68906.2	178036	133711		215410	119982	103573	635353	249683	155782		856794		125040		166648	305869		250678	174822	15160.3	49463.1	84712.3		64293.8	15519.6	40822.3	201504	85929.7	57150.1		233333		15804.5		152195	164311
IINEPTAAAIAYGLDKK		2.03858e-17	0.000276662	1	2	5	P11142	P11142 [172-188]		1	1787.99	267674	489677	637741	340475	408534	532451	366146	2.58522e+06	946468	560235		1.98819e+06		639236	1.97607e+06	767177	475162		1.94825e+06	1.1102e+06	58892	136045	404038	39780	121936	68872.2	144313	819910	325732	205528		541449		80796.1	335993	700644	255254
LLISSLSESPASVSILSQADNTSK		0.000190621	0.000276662	1	1	1	Q9Y6R7	Q9Y6R7 [55-78]		0	2447.29
LLNENSYVPR		2.16451e-10	0.000276662	1	1	12	P02786	P02786 [146-155]		0	1204.63	636452	543785	2.33084e+06		336633	227300	425877	1.58221e+07	1.38032e+06	1.11472e+06		1.40196e+06	542618	449637	2.75015e+06	3.27176e+06	360987	2.56281e+06	1.01316e+07	5.08545e+06	140028	151078	1.47669e+06		100475	29401.1	167855	5.01802e+06	475046	408946		381800	91604.3	56831.9	467610	2988019	193920	1.16133e+06
LLIYWASTR		0.00146336	0.000276662	1	1	16	P06312	P06312 [72-80]		0	1122.63	1.02156e+06	1.85888e+06	5.30063e+06	2.2418e+06	7.3635e+06	830346	3.01708e+06	7.24452e+06	1.52003e+06	1.49521e+06		1.15941e+06		702010	1.26323e+06	5.73084e+06	1.44577e+06		11169177	570639	224757	516445	3.35819e+06	261925	2.19779e+06	107405	1.18915e+06	2.29762e+06	523126	548531		315744		88730.4	214788	5233827	776659
LLIYGNSNRPSGVPDR		0.000123837	0.000276662	1	1	9	P01703	P01703 [67-82]		0	1757.93	563558	727771	487553	567088	730373	441322	460210	747154	578823	1.10036e+06					542434	2.26236e+06	1.1926e+06		1.02181e+06	1.24847e+06	123991	202194	308887	66256.7	217995	57084.7	181387	236962	199205	403677					92230.5	2.06616e+06	640655
LLIYGASSR		0.000260657	0.000276662	1	1	34	P01619	P01619 [67-75]		0	979.557	1.66839e+08	1.1412e+08	1.20968e+08	1.34107e+08	1.84805e+08	1.35578e+08	1.41157e+08	1.41152e+08	1.19927e+08	2.01539e+08	206612	1.11197e+08	1.32131e+08	9.83443e+07	1.73348e+08	8.6972e+07	1.20076e+08	5.87341e+07	1.46273e+08	1.35078e+08	3.67068e+07	3.17056e+07	7.66388e+07	1.56686e+07	5.51589e+07	1.7537e+07	5.56357e+07	4.47667e+07	4.12736e+07	7.39365e+07	7822.63	3.02825e+07	22306180	1.24302e+07	2.94746e+07	7.94293e+07	6.45044e+07	2.66152e+07
LLIYDASSLESGVPSR		1.64457e-11	0.000276662	1	1	2	A0A0B4J2D9	A0A0B4J2D9 [68-83]		0	1706.9		306585						117869	196196			36229.8			284231	813176						85177.1						37382.6	67521.9			9866.55			48328	742653
LLIYDASNLETGVPSR		4.64742e-14	0.000276662	1	1	9	P01593	P01593 [68-83]		0	1747.92	157859	504812	1.23653e+06		988516	791985	753415	1.3615e+06	684788	2.16041e+06		1.40799e+06			1.24418e+06	1.19772e+06	263646	261567	1.89714e+06	159815	34731.1	140250	783400		295044	102443	296951	431802	235674	792567		383442			211549	1.09385e+06	141629	118528
LLIYAVLPTGDVIGDSAK		1.24566e-14	0.000276662	1	1	6	P01023	P01023 [540-557]		0	1845.04
LLNDEDPVVVTK		0.000118713	0.000276662	1	1	11	P14923	P14923 [150-161]		0	1341.73	1.09057e+06	537512		2.67565e+06	422820	3.00326e+06			536666			118343	917860	649087	981220		254571			321559	239940	149335		312615	126200	388471			184697			32228.5	154952	82041.3	166838		136754
LLAALLEDEGGSGRPLLQAAK		7.52325e-15	0.000276662	1	1	3	Q9Y490	Q9Y490 [593-613]		0	2122.19							132167	122680					114161			242734			178744								52092.1	38908.2					19272.6			221682
ILGADTSVDLEETGR		6.97103e-19	0.000276662	1	1	4	P25705	P25705 [59-73]		0	1575.79	376473					462448						4.43399e+06			195971					285649	82829.2					59817.4						1207518			33321.2
IIEVEEEQEDPYLNDR		1.35775e-05	0.000276662	1	1	2	P23142	P23142 [164-179]		0	1990.92				1.45846e+06												793052								170401												724275
LLDEEEATDNDLR		1.17505e-11	0.000276662	1	1	1	Q8WUM4	Q8WUM4 [457-469]		0	1532.71																162143		2.77566e+08		77380.5																148081		125778264
LLCQCLGFGSGHFR	2xCarbamidomethyl [C3; C5]	0.000581364	0.000276662	1	1	8	P02751	P02751 [2231-2244]		0	1651.78		163367	687667		694029		594544	470165	354875	471496						1.48282e+06	124379	1.35676e+06	629102			45387.6	435668		207148		234333	149114	122132	172973						1.35422e+06	66815.6	614814
LICQATGFSPR	1xCarbamidomethyl [C3]	2.44761e-12	0.000276662	1	1	176	P01871	P01871 [132-142]		0	1249.64	3.91287e+09	1.9818e+09	1.82629e+09	2.81813e+09	3.48758e+09	1.65067e+09	1.97545e+09	1.63361e+09	1.73688e+09	2.85338e+09	1.01096e+10	1.92424e+09	2.89517e+09	1.74948e+09	2.40517e+09	1.20991e+09	1.97729e+09	1.11718e+09	1.63911e+09	9.06761e+08	8.60887e+08	5.50596e+08	1.15704e+09	3.29261e+08	1.04094e+09	2.13514e+08	7.78603e+08	5.18103e+08	5.97757e+08	1.04679e+09	3.82765e+08	5.24033e+08	4.8876e+08	2.21125e+08	4.08954e+08	1.10498e+09	1.06219e+09	5.06248e+08
LLCNGDNDCGDQSDEANCR	3xCarbamidomethyl [C3; C9; C18]	7.87057e-13	0.000276662	1	1	2	P07358	P07358 [138-156]		0	2212.83								96951.6				168282			61139.9	60504.8		77800.2	525645									30748.4				45828.6			10395.7	55257.5		35255
IICDNTGITTVSR	1xCarbamidomethyl [C3]	1.72853e-15	0.000276662	1	1	4	P11678	P11678 [674-686]		0	1449.74	161613		157814			208811		1.60816e+06		128238		562760				345639	181686				35557.2		99982.2			27009.6		510031		47045.3		153258				315664	97600.6
IICDNTGITTVSK	1xCarbamidomethyl [C3]	2.60278e-13	0.000276662	1	1	7	P05164	P05164 [702-714]		0	1421.73	671460		191916		363076	348088	244822	1.4593e+07	502382	206558		1.00223e+07			302499	975707	2.56066e+06	7.23409e+06	5.11125e+06	468196	147731		121587		108368	45025	96494.2	4.62821e+06	172897	75777.6		2.7294e+06			51434.2	891088	1.37557e+06	3.27811e+06
LLDEGQSLHFPR		1.43992e-07	0.000276662	1	1	6	Q8NDA2	Q8NDA2 [1393-1404]		0	1411.73	339365	695902	199521	309110		1.47879e+06	1.4463e+06	370430	849237	530799						152395	114897	71543.4			74665.1	193340	126405	36115.4		191281	570042	117483	292270	194729						139178	61722.2	32419.7
LICCDILDVLDK	2xCarbamidomethyl [C3; C4]	1.75837e-13	0.000276662	1	1	3	P62258	P62258 [95-106]		0	1476.74
LIASMSSDSLR		7.33892e-07	0.000276662	1	1	10	P00488	P00488 [706-716]		0	1179.6	1.94587e+06	1.0842e+06	167086	760903	204689	548889		454911		606734		855842	1.03216e+06	1.43742e+06	587859		324879	211738	460880	1.00473e+06	428119	301219	105857	88901.5	61093.9	70998.4		144276		222586		233073	174249	181682	99954.2		174523	95948.3
LLASDAGLYR		2.11232e-07	0.000276662	1	1	35	P13611	P13611 [120-129]		0	1078.59	1.4979e+07	1.4598e+07	3.99671e+06	9.52131e+06	1.08854e+07	1.88037e+07	1.12185e+07	1.30275e+07	8.91427e+06	1.41501e+07		6.0714e+06	1.1553e+07	2.19529e+07	8.22954e+06	6.101e+06	8.83348e+06	2.51601e+07	9.191e+06	4.14096e+07	3.2956e+06	4.05572e+06	2.5321e+06	1.11244e+06	3.24898e+06	2.43225e+06	4.42164e+06	4.1317e+06	3.06789e+06	5.19112e+06		1.65344e+06	1950369	2.77473e+06	1.39928e+06	5571887	4.7453e+06	1.14012e+07
ILAQATSDLVNAIK		2.36709e-11	0.000276662	1	1	4	Q9Y490	Q9Y490 [828-841]		0	1456.84		139152	274804		663298		643803	725561	249552	133584		3.16652e+06	254017	1.04831e+06	1.48039e+06	524488	268447		539139	188414		38659.9	174101		197975		253748	230113	85884.5	49006.7		862346	42883	132501	251712	479002	144208
LIANTLCNSR	1xCarbamidomethyl [C7]	0.000168915	0.000276662	1	1	8	Q14520	Q14520 [471-480]		0	1161.6		533010	123258			89292.1	408991	2.79486e+06	268451	312108		1.02814e+06				3.10897e+06	933099	1.45698e+06	854913	502854		148084	78089.3			11549.9	161200	886396	92388.8	114500		279997				2.83935e+06	501256	660225
ILAGPAGDSNVVKLQR		1.32776e-18	0.000276662	1	1	10	P04275	P04275 [1838-1853]		1	1637.93	355315	1.31953e+06	357086		1.61578e+06		1.03863e+06	1.9971e+06	1.54737e+06	1.59694e+06		480525		726660	407294	2.86151e+06	452016	2.12923e+06	970997	970895	78174.2	366601	226230		482263		409364	633385	532534	585851		130863		91846.2	69252.6	2.61335e+06	242820	964857
ILAGPAGDSNVVK		7.62937e-15	0.000276662	1	1	66	P04275	P04275 [1838-1850]		0	1240.69	6.183e+08	7.02792e+08	2.99352e+08	1.29438e+08	8.61565e+08	6.83859e+08	7.62419e+08	8.15616e+08	1.09263e+09	1.23253e+09	6.24869e+08	5.83631e+08	1.02929e+09	8.88174e+08	5.59333e+08	9.93943e+08	4.52007e+08	2.01616e+09	9.51772e+08	8.11887e+08	1.36035e+08	1.95254e+08	1.89653e+08	1.51231e+07	2.57152e+08	8.84568e+07	3.005e+08	2.58674e+08	3.76034e+08	4.52166e+08	2.36584e+07	1.58941e+08	1.73763e+08	1.12261e+08	9.5104e+07	9.07743e+08	2.42815e+08	9.13615e+08
LLAVAATAPPDAPNREEVFDER		3.21043e-06	0.000276662	1	1	10	P18206	P18206 [608-629]		1	2381.21		399075	340430		873037		379452	851910				1.51284e+06		780812	940137	391932	464408		287413	271525		110873	215678		260576		149557	270185				411994		98690.6	159852	357941	249477
LIEVNGQNVEGLR		6.99808e-12	0.000276662	1	1	16	Q15599	Q15599 [196-208]		0	1440.78	597163	344362		768144		1.72498e+06	211098	598436	614601			351661	713739		805134		201844	298722	169866	935749	131384	95672.7		89747.4		223125	83201.9	189795	211518			95768.7	120493		136898		108430	135365
ILDELLQTCVDPEDCPVCEVAGR	3xCarbamidomethyl [C9; C15; C18]	2.34159e-27	0.000276662	1	1	36	P04275	P04275 [1182-1204]		0	2688.23	1.31568e+06	4.03749e+06	1.90422e+07	1.59382e+06	3.27874e+07	9.18267e+06	1.74132e+07	2.88627e+07	1.02046e+07	3.41883e+07		3.4743e+07		1.35552e+06	6.96646e+06	6.97053e+07	2.60729e+06	6.33828e+07	3.80067e+07	2.08073e+06	289467	1.12172e+06	1.20641e+07	186217	9.78609e+06	1.18777e+06	6.86321e+06	9.15387e+06	3.51198e+06	1.25423e+07		9.46164e+06		171331	1.18451e+06	6.36601e+07	1.40062e+06	2.87217e+07
IIDELNVKPEGTR		5.05488e-14	0.000276662	1	1	8	P12111	P12111 [862-874]		0	1483.81	1.03916e+06	1.72728e+06	1.34318e+06	844399	927227	1.56493e+06	1.77048e+06	1.67368e+06	1.92706e+06	912467		1.88028e+06		749700	322131	1.56564e+06	1.94393e+06		1.41272e+06	1.25245e+06	228631	479882	850963	98656.8	276751	202423	697815	530811	663209	334747		512061		94758.2	54772.2	1.42986e+06	1.04427e+06
LLETECPQYIR	1xCarbamidomethyl [C6]	2.23812e-11	0.000276662	1	1	19	P05109	P05109 [37-47]		0	1421.71	1.95224e+06	2.37209e+06	1.42198e+06	1.30141e+06	1.77585e+06	3.89687e+06	2.34664e+06	2.41599e+06	1.88313e+06	6.54962e+06		1.50702e+06	1.73997e+07	1.32577e+07	722862	1.80187e+06	5.60399e+06	2.65687e+06	1.92154e+06	5.0145e+06	429519	659028	900888	152053	530040	504058	924904	766235	648089	2.40279e+06		410411	2.9374e+06	1.6757e+06	122909	1.6456e+06	3.01043e+06	1.20395e+06
LLEPHCFPLSLVPTEFCPSPPALK	2xCarbamidomethyl [C6; C17]	6.15525e-27	0.000276662	1	1	2	P10643	P10643 [555-578]		0	2749.41
LLELTGPK		0.00161072	0.000276662	1	1	25	P04217	P04217 [107-114]		0	870.529	2.16743e+06	1.27864e+06	632957	981406	1.98312e+06	4.56263e+06	4.71886e+06	6.32728e+06	2.36382e+06	4.4009e+06		6.96176e+06	864709	1.02109e+06	689055	805866	5.38384e+06	8.09607e+06	3.10849e+06	9.27958e+06	476865	355239	401007	114664	591904	590173	1.85989e+06	2.00671e+06	813520	1.61451e+06		1.89591e+06	145979	129061	117161	735977	2.89217e+06	3.66871e+06
LLEGEDAHLSSSQFSSGSQSSR		3.25417e-18	0.000276662	1	1	22	P02533	P02533 [418-439]		0	2309.06	5.51981e+06	1.92846e+06	1.57274e+06	6.59066e+06	1.89254e+06	1.16553e+07	1.81001e+06	1.18067e+06	922377	803062		609587	1.65947e+06	3.09196e+06	2.24814e+06	417746	2.81e+06	1.03196e+06	364177	1.63407e+06	1.21444e+06	535777	996401	770032	564869	1.50761e+06	713397	374452	317441	294611		166010	280151	390808	382254	381517	1.50952e+06	467629
LLEGEDAHLSSQQASGQSYSSR		0.000345048	0.000276662	1	1	12	P08779	P08779 [420-441]		0	2350.09	3.052e+06	616475	747278	918537	713969	6.30499e+06	1.99979e+06	396225	207689	548901			826144	1.09544e+06	2.99427e+06	290522	4.18076e+06		251558	696121	671483	171273	473435	107319	213099	815547	788197	125664	71477.5	201369			139469	138458	509119	265326	2.24588e+06
ILEFFGLK		0.00194721	0.000276662	1	1	2	P07237	P07237 [301-308]		0	966.566		135042	325175				158724	481379	253129	147467				47145.5		120955	220462		95461.9	530945		37518.2	206013				62559.3	152670	87115.7	54099.6				5958.95		110466	118431
ILDELLQTCVDPEDCPVCEVAGRR	3xCarbamidomethyl [C9; C15; C18]	7.41861e-15	0.000276662	1	1	3	P04275	P04275 [1182-1205]		1	2844.33										229363						622807		214986	263444											84144						568794		97420.3
ILEAHQNVAQLSLAEAQLR		9.6362e-27	0.000276662	1	1	11	Q86UX7	Q86UX7 [524-542]		0	2104.15		447421	824127		459229	241271	568748	1.09279e+06	571716	355851		1.83533e+06		563137	646118	1.28844e+06	492137	251930	570748	122969		124305	522122		137067	31208.3	224166	346582	196759	130547		499820		71177.7	109860	1.1767e+06	264373	114161
LLDSLPSDTR		4.39801e-09	0.000276662	1	1	15	P05155	P05155 [277-286]		0	1116.59	850456	1.31484e+06	1.11817e+06	1.40793e+06	2.07186e+06	2.44647e+06	2.49091e+06	2.43865e+06	2.17301e+06	2.97383e+06		3.55309e+06		1.55746e+06	5.34137e+06	5.78639e+06	3.92416e+06	5.47771e+06	3.93456e+06	2.96175e+06	187112	365297	708410	164498	618392	316450	981768	773423	747853	1.09098e+06		967623		196855	908198	5284560	2.10804e+06	2.48221e+06
LIDQYGTHYLQSGSLGGEYR		1.93805e-18	0.000276662	1	1	2	P10643	P10643 [295-314]		0	2257.09												220635				385299			1.24226e+06													60086				351884
LLDQQLDQELVK		8.3052e-10	0.000276662	1	1	8	P07476	P07476 [129-140]		0	1441.79	386254	555001	275197	942897	599283	1.40233e+06	299446	252515		703491		202754		209741	972287	253693	729145		311021	842295	84981.3	154194	174350	110165	178869	181391	118023	80085.7		258082		55216.6		26510.2	165319	231691	391692
LLDNWDSVTSTFSK		7.41861e-15	0.000276662	1	1	14	P02647	P02647 [70-83]		0	1612.79	4.88626e+06	1.68379e+07	3.52293e+07	1.50943e+06	6.28045e+06	2.76765e+06	1.9023e+07	1.53201e+07	1.89164e+07	1.12305e+07		2.59741e+07		2.85058e+06	8.38315e+06	1.84766e+07	1.7661e+07		1.32688e+07	3.39706e+06	1.07504e+06	4.678e+06	2.23194e+07	176357	1874533	357994	7.49771e+06	4.85882e+06	6.51017e+06	4.12003e+06		7.07359e+06		360299	1.42539e+06	1.68742e+07	9.48741e+06
IIDGVPVEITEK		1.78843e-05	0.000276662	1	1	9	Q15063	Q15063 [736-747]		0	1312.74	431367	1.00369e+06	506256			879013	900737	750592	719114	996862		1.04322e+06		455273		360322	374277		498539	1.07925e+06	94906.8	278850	320737			113700	355016	238052	247487	365708		284103		57544.1		329073	201059
ILDELTLCK	1xCarbamidomethyl [C8]	3.28594e-05	0.000276662	2	3	2	Q15323; O76011	Q15323 [165-173]; O76011 [207-215]		0	1104.6	725828					5.90153e+06		333822													159692					763360		105873
LIDVISMYR	1xOxidation [M7]	1.571e-06	0.000276662	1	1	46	P04114	P04114 [4262-4270]		0	1125.6	2.47298e+07	1.34276e+07	5.75555e+07	2.35923e+06	5.29762e+06	5.02491e+06	1.00547e+07	1.59149e+07	2.85125e+07	1.76167e+07	131569	2.47211e+07	4.03196e+07	4.15058e+07	7.494e+06	6.51594e+07	2.48639e+07	6.40244e+06	3.2131e+07	1.17588e+07	5.4409e+06	3.73052e+06	3.64641e+07	275645	1.58119e+06	649970	3.96294e+06	5.04744e+06	9.81273e+06	6.46287e+06	4981.4	6.73236e+06	6.80672e+06	5.24612e+06	1.27421e+06	5.95084e+07	1.33568e+07	2.90125e+06
IIPHHNYNAAINK		0.000377785	0.000276662	1	1	1	P00740	P00740 [299-311]		0	1504.8		110140	66953.5			43091.7		25467					579262		187262	448515						30599.7	42418.1			5573.89		8076.93					97790.4		31840.4	409618
LFAYPDTHR		3.44596e-05	0.000276662	1	1	19	P04040	P04040 [355-363]		0	1119.56	2.69802e+06	1.46389e+06	550381	3.39731e+06	812433	2.25949e+06	4.38396e+06	1.40561e+06	1.35881e+06	1.24435e+06		2.50449e+06	3.85079e+06	2.32357e+06	3.12603e+06	1.92546e+06	4.81799e+06	742444	723404	2.03878e+06	593601	406706	348692	396931	242488	292264	1.72789e+06	445793	467640	456501		682053	650088	293688	531522	1.75848e+06	2.5882e+06	336436
IEVLEEELR		0.000198375	0.000276662	1	1	8	P15924	P15924 [1034-1042]		0	1129.61	1.87509e+06	1.31651e+06	912259	2.44927e+06		4.04173e+06						1.4957e+06	1.17921e+06	2.1565e+06	1.63e+06		560487	67545.3			412547	365761	577958	286164		522796						407326	199074	272571	277150		301090	30608
ICMDEDGNEK	1xCarbamidomethyl [C2]; 1xOxidation [M3]	1.13027e-09	0.000276662	1	1	55	P04275	P04275 [1878-1887]		0	1226.47	2.60079e+07	2.56121e+07	1.16513e+07	8.16418e+06	5.33748e+07	4.32658e+07	2.98197e+07	4.45651e+07	3.21232e+07	5.0777e+07	5.38259e+07	2.20902e+07	4.16347e+07	4.20558e+07	2.82851e+07	5.13428e+07	1.67691e+07	1.33582e+08	3.57355e+07	2.90899e+07	5.7221e+06	7.11571e+06	7.38165e+06	953877	1.59309e+07	5.59641e+06	1.17531e+07	1.41339e+07	1.10554e+07	1.8628e+07	2.03792e+06	6.01588e+06	7.02874e+06	5.31564e+06	4.80934e+06	4.68901e+07	9.00825e+06	6.05325e+07
ICMDEDGNEK	1xCarbamidomethyl [C2]	4.23989e-10	0.000276662	1	1	37	P04275	P04275 [1878-1887]		0	1210.47	2.38421e+07	2.21137e+07	1.1492e+07	1.03425e+07	5.72918e+07	2.55942e+07	4.02866e+07	4.97868e+07	3.35627e+07	6.06957e+07		3.44171e+07	2.8808e+06	3.09999e+07	2.21944e+07	1.091e+08	2.90778e+07	2.7392e+08	77206490	3.25295e+07	5.24559e+06	6.14375e+06	7.28068e+06	1.20839e+06	1.71e+07	3.3106e+06	1.58786e+07	1.579e+07	1.15508e+07	2.22668e+07		9.37289e+06	486334	3.91824e+06	3.77373e+06	9.96378e+07	1.56205e+07	1.24126e+08
ICLDLQAPLYK	1xCarbamidomethyl [C2]	3.28464e-12	0.000276662	1	1	28	P02776	P02776 [82-92]		0	1333.72	1.0811e+08	4.15793e+07	1.62327e+07	1.76857e+07	1.00183e+08	3.48277e+08	9.44099e+07	1.57577e+08	2.47455e+08	9.43757e+07		2.63526e+08	503492	9.39864e+07	5.68723e+08	1.08641e+08	1.12124e+08	1.126e+08	3.64505e+07	2.31842e+08	2.37856e+07	1.15518e+07	10284174	2.06634e+06	2.99017e+07	4.50494e+07	3.72107e+07	4.9976e+07	8.5163e+07	3.46226e+07		7.17666e+07	84999	1.18794e+07	9.67005e+07	9.92194e+07	6.02323e+07	5.10244e+07
LCHCPVGYTGAFCDVDTK	3xCarbamidomethyl [C2; C4; C13]	1.13113e-22	0.000276662	1	1	1	P00748	P00748 [197-214]		0	2099.9
LCGACGNFDGDQTNDWHDSQEKPAMEK	2xCarbamidomethyl [C2; C5]	3.72308e-17	0.000276662	1	1	4	Q9Y6R7	Q9Y6R7 [5368-5394]		0	3110.27	376390	309542	468896	542575	404350	270697	304480	462488	309240	298286		961077	529395	822009	1.44612e+06	436237	647432				82810.9	85998.7	297067	63392.8	120687	35014.5	120008	146679	106427	109429		261732	89372	103898	245885	398404	347797
LCAGTGENK	1xCarbamidomethyl [C2]	0.000641099	0.000276662	1	1	18	P02788	P02788 [191-199]		0	949.441	2.20549e+06	152553	179650	1.78245e+06	3.87294e+06	1.10432e+07	4.12896e+06	8.48807e+06	1.84365e+06	2.31836e+06	2.79198e+06	227586	383634	963169	1.56641e+06	1920.84	3.25536e+06	1.22429e+06	837366	3.07222e+06	485238	42383.2	113817	208256	1.15596e+06	1.42843e+06	1.62739e+06	2.69201e+06	634502	850512	105708	61979.1	64764.7	121740	266339	1754.25	1.74876e+06	554785
ICMDEDGNEKRPGDVWTLPDQCHTVTCQPDGQTLLK	3xCarbamidomethyl [C2; C22; C27]	3.69137e-18	0.000276662	1	1	4	P04275	P04275 [1878-1913]		1	4213.9																5.52285e+06			4.88029e+06																	5.04388e+06
IAYGTQGSSGYSLR		2.79816e-16	0.000276662	1	1	15	P03952	P03952 [360-373]		0	1459.72	498895	844797		133099	479239	168646	1.19663e+06	589563	1.02333e+06	219449		2.30011e+06		490245	7.77524e+06	2.12082e+06	696295		398614	635151	109764	234706		15550.8	143039	21814.3	471640	186981	352184	80506.9		626396		61964.4	1.32203e+06	1.93689e+06	374046
IAVQPGTVGPQGR		7.25889e-11	0.000276662	1	1	9	P08572	P08572 [1397-1409]		0	1279.71	707508	613657	266585	1.01247e+06	1.34321e+06	1.27416e+06	828695	1.43224e+06	501230	917060		679665		1.05865e+06	1.05776e+06	971724	486422	2.74051e+06	897793	3.93172e+06	155662	170490	168894	118294	400911	164811	326621	454238	172501	336432		185095		133808	179852	887451	261303	1.24185e+06
LAVDEEENADNNTK		8.92123e-18	0.000276662	1	1	6	P02786	P02786 [40-53]		0	1561.7	584987	207939	1.3111e+06	334377		531694	239149	9.40727e+06	533308	459915		755623	259706	236544	907025	2.10201e+06	243781	4.43131e+06	6.59678e+06	1.81577e+06	128705	57770.9	830643	39067.6		68774.4	94258.2	2.98354e+06	183541	168724		205780	43843.3	29897.9	154222	1.91971e+06	130958	2.00804e+06
IAVAQYSDDVK		1.35172e-11	0.000276662	1	1	10	P12111	P12111 [875-885]		0	1208.62	1.1288e+06	1.78146e+06	1.03391e+06	788058	693744	1.37318e+06	2.19557e+06	1.6128e+06	1.54634e+06	804743		1.46126e+06	1.39717e+06	1.899e+06	1.02252e+06	727560	886069	2.0921e+06	747804	1.80181e+06	248351	494936	655029	92074.2	207063	177620	865362	511503	532182	295228		397949	235870	240024	173859	664462	475991	948030
IAVAAQNCYK	1xCarbamidomethyl [C8]	0.000620689	0.000276662	1	1	4	P60174	P60174 [97-106]		0	1137.57	481321	499674	249756	322606	339095	465935	685023	814222	659390	250304		655109	1.70577e+06	917489	430781	213139	379720		191069	1.06494e+06	105897	138822	158232	37692.2	101210	60268.5	269995	258232	226933	91826.2		178407	287967	115966	73246.1	194654	203983
LATVGELQAAWR		1.54169e-12	0.000276662	1	1	13	P13611	P13611 [277-288]		0	1314.72	306200	1.06826e+06	363727	513836	827246	935363	852837	1.73353e+06	878111	1.67844e+06		1.3927e+06		647666	578729	997652	473737	2.20776e+06	1371885	2.1291e+06	67368.2	296790	230438	60034.9	246909	120989	336137	549792	302207	615753		379278		81861.7	98401.8	911130	254489	1.00044e+06
LATALSLSNK		2.723e-11	0.000276662	1	1	39	P04114	P04114 [3395-3404]		0	1017.59	1.70025e+08	1.35504e+08	4.67336e+08	1.44489e+07	5.32327e+07	1.225e+07	9.75354e+07	9.49379e+07	2.39407e+08	1.03931e+08		3.18258e+08	3.35222e+08	2.55872e+08	5.94957e+07	3.36784e+08	1.93195e+08	4.38842e+07	1.90094e+08	6.97177e+07	3.74078e+07	3.76464e+07	2.96079e+08	1.68817e+06	15888448	1584536	3.84426e+07	3.01098e+07	8.23931e+07	3.8128e+07		8.66721e+07	5.65919e+07	3.23409e+07	1.01161e+07	3.07576e+08	1.03784e+08	1.9886e+07
LAVTTHGLPCLAWASAQAK	1xCarbamidomethyl [C10]	0.000508531	0.000276662	1	1	4	P00734	P00734 [225-243]		0	1995.05			98041.7		114377		199197	533202	137746	282365		602015				193368	189988		121764				62113.9		34138.2		78511.4	169106	47406.2	103588		163948				176598	102061
LASYLDKVR		9.6887e-10	0.000276662	5	7	12	P02533; P13645; P19012; Q04695; P08779	P02533 [126-134]; P13645 [157-165]; P19012 [116-124]; Q04695 [95-103]; P08779 [128-136]		1	1064.61	1.20184e+07	1.99814e+07	5.7095e+06	9.40625e+07	1.19855e+07	4.55117e+07	1.40742e+07	2.75527e+07	3.50798e+07	1.1494e+07		5.99234e+06	1.68502e+07	1.53464e+07	3.34043e+07	4.33572e+06	9.40224e+06	4.51571e+06	2.82595e+07	2.91056e+07	2.64421e+06	5.55136e+06	3.61723e+06	1.099e+07	3.57734e+06	5.88691e+06	5.5472e+06	8.73839e+06	1.20729e+07	4.21667e+06		1.63191e+06	2.84464e+06	1.93971e+06	5.67976e+06	3.9597e+06	5.05083e+06	2.04628e+06
ICMDEDGNEKRPGDVWTLPDQCHTVTCQPDGQTLLK	3xCarbamidomethyl [C2; C22; C27]; 1xOxidation [M3]	1.13902e-13	0.000276662	1	1	1	P04275	P04275 [1878-1913]		1	4229.9								333218								1.80214e+06			2261922									105681								1.64585e+06
LCMGSGLNLCEPNNK	2xCarbamidomethyl [C2; C10]; 1xOxidation [M3]	8.3052e-10	0.000276662	1	1	12	P02787	P02787 [516-530]		0	1722.76	728315	815951	333496	1.38327e+06	1.77779e+06	7.51952e+06	4.57184e+06	1.0432e+07	2.07911e+06	4.87534e+06		5.31803e+06		840735	4.15438e+06	510144	2.66655e+06	5.07422e+06	3.03542e+06	1.0192e+07	160239	226692	211285	161617	530620	972646	1.80194e+06	3.30852e+06	715537	1.78857e+06		1.44827e+06		106265	706374	465901	1.43246e+06	2299369
LDELRDEGK		4.78361e-09	0.000276662	1	1	16	P02768	P02768 [206-214]		1	1074.54	1.35283e+07	2.38317e+07	1.26404e+07	2.18013e+07	5.52623e+07	1.11624e+08	1.73428e+08	1.51337e+08	5.50294e+07	1.00662e+08		8.51013e+07	1.6736e+07	1.2678e+07	9.90036e+06	1.1907e+07	1.33034e+08	2.10978e+08	62867340	2.19335e+08	2.97641e+06	6.62105e+06	8.00827e+06	2547198	16494225	14438449	68354920	47996924	18938668	36928708		23175848	2.82535e+06	1.60244e+06	1.68337e+06	10874403	71465024	95603896
IDDIWNLEVK		5.21474e-12	0.000276662	1	1	11	P04114	P04114 [3538-3547]		0	1244.65	6.50909e+06	7.1272e+06	3.04613e+07	1.40104e+06	3.218e+06	941023	6.42043e+06	9.2642e+06	1.29777e+07	1.09925e+07		3.1498e+07		7.42584e+06	2.88888e+06	3.77006e+07	6.60959e+06	2.27988e+06	1.66764e+07	2.9742e+06	1.43209e+06	1.98012e+06	1.92986e+07	163693	960479	121721	2.53054e+06	2.93816e+06	4.46634e+06	4.03272e+06		8.57793e+06		938589	491199	3.4431e+07	3.55064e+06	1.03312e+06
IDDLFSGK		0.000129157	0.000276662	1	1	15	P60033	P60033 [194-201]		0	894.457	6.22522e+06	1.75438e+06	2.12574e+06	376382	3.04282e+06	3.37279e+06	3.77277e+06	4.28103e+06	4.23142e+06	4.47919e+06	224636	1.23329e+06	3.67083e+06	6.10065e+06	1.4184e+06	3.36172e+06	1.0073e+07	2.21994e+06	3.12085e+06	5.26407e+06	1.36963e+06	487412	1.34675e+06	43975.2	908194	436268	1.487e+06	1357738	1.45627e+06	1.64323e+06	8505.02	335864	619707	771091	241172	3.07017e+06	5.41117e+06	1.00596e+06
LDDGDYLCEDGCQNNCPACTPGQAQHYEGDR	4xCarbamidomethyl [C8; C12; C16; C19]	6.25624e-12	0.000276662	1	1	5	Q9Y6R7	Q9Y6R7 [642-672]		0	3615.39	554546							436181		238424		97746			134039	216423	501946				122008							138336		87468.1		26619.4			22790.8	197653	269642
LDDDLEHQGGHVLDHGHK		5.73402e-14	0.000276662	1	1	5	P01042	P01042 [479-496]		0	2021.94	223883		484371	1.61353e+06	1.92025e+06	817793	4.43149e+06	2.67161e+06	1.55206e+06	602530		285019	594960	495907	1.33951e+06	1.03942e+07	3.23704e+06		564074	870822	49257.4		306871	188520	573139	105781	1.74663e+06	847307	534150	221044		77619.8	100441	62680.1	227759	9.49274e+06	1.73892e+06
IDATSASVLASR		2.28807e-05	0.000276662	1	1	4	P13667	P13667 [120-131]		0	1190.64				1.83857e+06		908824		438363				787241		535756	407411			178857		619273				214813		117556		139028				214391		67716.9	69272.6			81048.4
LCMGSGLNLCEPNNK	2xCarbamidomethyl [C2; C10]	1.60982e-08	0.000276662	1	1	7	P02787	P02787 [516-530]		0	1706.77						1.85931e+06	853111	3.2154e+06				1.4298e+06					1.08813e+06	3.61556e+06	1.13227e+06	4.0312e+06						240501	336245	1.01977e+06				389380					584536	1.63838e+06
LDAQASFLPK		0.00112919	0.000276662	1	1	5	P19827	P19827 [205-214]		0	1089.59	513500	289244	368888		359164		672992	1.1912e+06	177700	1.34216e+06		483884	194395	735677	543099	856278	2.04472e+06	2.27117e+06	562016	2.40413e+06	112977	80359.3	233707		107200		265253	377793	61156.5	492385		131777	32817.6	92985.8	92343.7	782017	1.09841e+06	1.02917e+06
LCQIPVHGASVPK	1xCarbamidomethyl [C2]	0.000113779	0.000276662	1	1	10	Q14766	Q14766 [429-441]		0	1405.76	695282	1.96284e+06	608061	191164	2.84219e+06	854436	2.26086e+06	644498	1.37316e+06	1.19133e+06		1.90452e+06		3.58587e+06	3.3777e+06	1.30524e+06	562272	673600	932722	3.15175e+06	152972	545328	385235	22335	848312	110521	891093	204404	472582	437052		518661		453236	574313	1192044	302049	305240
LCQDLGPGAFR	1xCarbamidomethyl [C2]	3.05557e-09	0.000276662	1	1	17	P08697	P08697 [151-161]		0	1233.6	1.5152e+06	2.835e+06	4.52174e+06	5.55428e+06	5.61906e+06	3.41031e+06	3.27842e+06	3.88843e+06	3.89755e+06	3.78253e+06		5.13533e+06		3.86652e+06	2.39202e+07	6.28764e+06	3.62328e+06	1.17657e+07	8.20642e+06	4.89213e+06	333365	787636	2.86473e+06	648944	1.67713e+06	441122	1.29215e+06	1.23323e+06	1.34136e+06	1.38766e+06		1.39852e+06		488708	4.06717e+06	5.74234e+06	1.9464e+06	5331615
LCPSGMYTEYIHSR	1xCarbamidomethyl [C2]	1.90215e-12	0.000276662	1	1	5	Q4LDE5	Q4LDE5 [1034-1047]		0	1713.77																789980		990673	609223																	721469		448921
LCNTGDNSVCTTK	2xCarbamidomethyl [C2; C10]	4.44589e-11	0.000276662	1	1	5	P03952	P03952 [374-386]		0	1469.64	630554	571505	948499	806729	540488	243159	1.40097e+06	657915	994922	179003		2.90783e+06	581960	660201	7.27466e+06	2.24939e+06	1.01413e+06	3.6285e+06	476080	685300	138731	158779	600918	94255.6	161320	31452.4	552179	208659	342408	65668.8		791897	98245.9	83446.1	1.23692e+06	2.05431e+06	544787	1644246
LCNSPSPQMNGKPCEGEAR	2xCarbamidomethyl [C2; C14]	2.0515e-08	0.000276662	1	1	2	P07996	P07996 [461-479]		0	2131.93		181048									47353.5	216796				119275	90045.9		251186	183923		50299.8									1792.87	59040.5				108930	48372.1
LCNNPTPQFGGK	1xCarbamidomethyl [C2]	2.23812e-11	0.000276662	1	1	9	P07996	P07996 [518-529]		0	1332.64	2.51087e+06	7.10089e+06	1.08135e+07	387093	3.41002e+06	2.30702e+06	1.02955e+07	5.4126e+06	4.68226e+06	3.43554e+06		1.03958e+07	1.52246e+07	1.41885e+07	8.70488e+06	2.73741e+06	4.66222e+06	40939.5	5.33382e+06	3.30295e+06	552426	1.97281e+06	6850851	45226.8	1.01779e+06	298411	4.05786e+06	1.71662e+06	1.61143e+06	1260360		2.83111e+06	2.57021e+06	1.79335e+06	1.4801e+06	2.50001e+06	2.50452e+06	18551.6
LDAPSQIEVK		1.65939e-08	0.000276662	1	1	11	P24821	P24821 [803-812]		0	1099.6	7.57733e+06	5.21676e+06	2.14855e+06	1.34815e+07	4.84217e+06	6.72996e+06	4.37229e+06	1.11713e+07	5.21132e+06	3.88754e+06		4.13424e+06	1.02486e+07	7.3892e+06	2.51904e+07	2.80264e+06	6.3415e+06		1.70788e+06	7.8687e+06	1.66712e+06	1.44935e+06	1361207	1.57514e+06	1.44525e+06	870517	1.72329e+06	3.543e+06	1793504	1.42618e+06		1.12589e+06	1730161	933958	4283155	2559581	3406620
IDESIHLQLR		1.80511e-06	0.000276662	1	1	6	Q9Y262	Q9Y262 [382-391]		0	1223.67	1.87851e+07	5.02238e+06	1.19137e+06	3.56351e+06	634394	1.62367e+06		209243	244250												4132983	1.39535e+06	754787	416348	189349	210021		66361.9	84060
LASYLDKVQALEEANNDLENK		1.11833e-08	0.000276662	1	1	3	P35527	P35527 [164-184]		1	2377.19			175505			665521	59091.7	167799	1.28408e+06	250542					349368	456433							111191			86084.8	23290.4	53217.7	441922	91913.7					59403.3	416849
IASNSATAFR		2.38667e-08	0.000276662	1	1	14	P12111	P12111 [1789-1798]		0	1037.54	2.38391e+06	1.93361e+06	1.83894e+06	1.14512e+06	953117	3.93966e+06	1.46877e+06	1.80916e+06	2.14463e+06	993201		1.64415e+06	3.13039e+06	1.22198e+06	867025	564951	1.12807e+06	3.54327e+06	893494	1.49239e+06	524494	537208	1.16505e+06	133792	284478	509593	578899	573778	738087	364365		447755	528469	154452	147421	515955	605991	1.60562e+06
IALETSLSK		5.4875e-06	0.000276662	1	1	9	P32942	P32942 [63-71]		0	961.556	1.85061e+06	1.51015e+06	2.69783e+06	2.50128e+06	3.50954e+06	1.99254e+06	1.14859e+06	4.57617e+06	2.31021e+06	3.28301e+06		2.59893e+06		1.55606e+06	4.6758e+06	1.26282e+06	3.61009e+06	532452	3.30603e+06	1.9798e+06	407160	419558	1.7092e+06	292241	1.0475e+06	257733	452706	1.45134e+06	795070	1.2044e+06		707773		196678	795030	1.1533e+06	1.93932e+06	241279
LALENYITALQAVPPRPR		2.92983e-09	0.000276662	1	1	2	P05067	P05067 [471-488]		0	2022.15							232618																				91683.8
LALDNGGLAR		2.51227e-06	0.000276662	1	1	24	Q14624	Q14624 [429-438]		0	999.558	1.2843e+07	2.67232e+07	3.06719e+07	8.2397e+06	1.95867e+07	1.1928e+07	3.85204e+07	1.76753e+07	3.90336e+07	8.77886e+06		4.34614e+07	3.61293e+07	2.51235e+07	3.07786e+08	1.3743e+08	3.12138e+07	8.39404e+06	1.57874e+07	1.89329e+07	2.82564e+06	7.42439e+06	1.94321e+07	962700	5.84608e+06	1.54288e+06	1.51824e+07	5.60576e+06	1.34336e+07	3.22061e+06		1.18359e+07	6.09931e+06	3.17548e+06	5.23331e+07	1.25511e+08	1.67679e+07	3.80374e+06
LALDIEIATYR		2.7761e-08	0.000276662	5	6	3	P08729; P04264; Q6KB66; P19013; P05787	P08729 [383-393]; P04264 [473-483]; Q6KB66 [374-384]; P19013 [444-454]; P05787 [382-392]		0	1277.71	69990.1	18520.1	282984	105980	164785	122382	197967	172702	31900.8	28550			25890	99142.3	176745	613214	72049		255257	91556.1	15398.8	5145.37	179283	12382.4	49183.5	15830	78026.5	54772.8	10978.8	10473.8			4370.72	12531.1	30052.1	560032	38704.3
LALASLGYEK		1.29193e-06	0.000276662	1	1	2	Q8WUM4	Q8WUM4 [111-120]		0	1064.6
IAIANIIDEIIEK		2.53547e-08	0.000276662	1	1	2	P04114	P04114 [2196-2208]		0	1454.85			285862													99773.3	32979.3						181107													91120.4	17716.3
IAIIGAGIGGTSAAYYLR		1.02612e-05	0.000276662	1	1	2	Q9UHG3	Q9UHG3 [37-54]		0	1766.98		41521.4	627901	188336			168975	124672	159820	88544.5						386755			155903			11535.7	397804	22004.6			66599.9	39540	55002.9	32483.4						353214
LAGKPTHVNVSVVMAEVDGTCY	1xCarbamidomethyl [C21]	7.23615e-13	0.000276662	1	1	1	P01876	P01876 [332-353]		0	2347.14			230859									351153				341481			868817				146260									95630.3				311866
LAGESESNLR		1.39794e-07	0.000276662	1	1	6	P55072	P55072 [278-287]		0	1075.54	405797	911736	742133	401941	1.1995e+06	817148	1.83881e+06	777153	541250	920518		949892	1.16149e+06	1.1741e+06	1.24705e+06	58663.2	1.11273e+06	967664	1.09683e+06	1.98999e+06	89281	253304	470175	46961.5	358018	105698	724748	246476	186274	337701		258686	196082	148400	212037	53575.6	597753	438494
LAGAPSEDPQFPK		1.1876e-06	0.000276662	1	1	1	O00391	O00391 [488-500]		0	1356.68	111769															489698					24590.8															447229
LAFESENINSEIHCDR	1xCarbamidomethyl [C14]	7.77348e-21	0.000276662	1	1	6	Q13201	Q13201 [1170-1185]		0	1933.87		643840	683720		738269		377165					1.02689e+06	87420.5		609095	633993			636252	427664		178876	433168		220352		148655					279656	14758.3		103565	579010
LAEVALAYAK		4.6785e-06	0.000276662	1	1	1	P13716	P13716 [150-159]		0	1048.6
IAELSATAQEIIK		3.88286e-17	0.000276662	1	1	74	P04114	P04114 [4466-4478]		0	1386.78	7.97673e+07	6.20158e+07	1.83999e+08	2.56328e+07	2.20081e+07	5.44915e+06	3.15876e+07	5.52702e+07	1.07983e+08	7.75211e+07	367998	1.3663e+08	7.15164e+07	5.68101e+07	2.37138e+07	2.20597e+08	5.24088e+07	2.57903e+07	1.35664e+08	3.7908e+07	1.75499e+07	1.72296e+07	1.16572e+08	2.99485e+06	6.56878e+06	704845	1.24499e+07	1.75291e+07	3.71628e+07	2.84394e+07	13932.9	3.72088e+07	12073326	7.1805e+06	4.03209e+06	2.01466e+08	2.81537e+07	1.16868e+07
LAELEGALQK		4.09263e-06	0.000276662	2	5	2	P78386; O43790	P78386 [385-394]; O43790 [368-377]		0	1071.6	667590	174840		165297		1.09748e+07		550014						333534		86293.5				117205	146879	48575.1		19312.8		1.41959e+06		174438						42157		78809.7
LAGFLDLTEQEFR		1.35806e-17	0.000276662	1	1	7	Q9Y262	Q9Y262 [475-487]		0	1538.78	3.14485e+07	5.79721e+06		3.2439e+06		2.19982e+06														92947	6.9191e+06	1.61061e+06		379007		284546
LASPGFPGEYANDQER		9.37602e-05	0.000276662	1	1	8	O00187	O00187 [30-45]		0	1750.8	294138	980151	435327	1.23097e+06	689148	657835	995692	1.24446e+06	736205	575106		412838	37523.4	190432	1.11384e+06	701903	684409	551800	651482	846400	64714.6	272311	275799	143822	205691	85090.6	392441	394682	253369	210983		112429	6334.66	24069.6	189388	641030	367660	250047
LAILGIHNEVSK		1.39013e-11	0.000276662	1	1	14	P12814	P12814 [566-577]		0	1293.75	2.31667e+06	4.70026e+06	1.75263e+06	352850	1.76542e+06	1.81587e+06	1.27762e+06	1.12071e+06	2.78221e+06	3.05964e+06		831112	5.03684e+06	1.32457e+06	1.05652e+06	1.49896e+06	1.30822e+06		1.57288e+06	3.06365e+06	509700	1.30585e+06	1.11037e+06	41225.9	526928	234882	503561	355436	957511	1.12246e+06		226339	850314	167419	179641	1.36896e+06	702770
IALVITDGR		1.26281e-08	0.000276662	1	1	21	P12109	P12109 [723-731]		0	957.573	2.13113e+06	2.48076e+06	2.27994e+06	1.39608e+06	1.12653e+06	2.85448e+06	2.32115e+06	3.43462e+06	3.48046e+06	1.30125e+06		2.26351e+06	1.98157e+06	1.29121e+06	1.23484e+06	641600	1.73492e+06	1.97431e+06	888341	1.90243e+06	468878	689220	1.44445e+06	163113	336236	369225	914858	1.0893e+06	1.19782e+06	477374		616427	334527	163202	209961	585957	931988	894651
IASLEVENQSLR		9.03336e-10	0.000276662	1	1	3	P29692	P29692 [84-95]		0	1358.73																560280	268994																			511690	144502
IASFSQNCDIYPGK	1xCarbamidomethyl [C8]	2.31247e-17	0.000276662	1	1	14	P01042	P01042 [241-254]		0	1599.75	1.79696e+06	2.29694e+06	825478	2.01431e+06	2.28575e+06	4.07581e+06	3.72437e+06	6.06714e+06	1.66127e+06	3.10634e+06		4.62669e+06	1.18367e+06	1.09236e+06	1.91592e+06	4.35428e+06	3.13194e+06	4.64092e+06	2127633	7.35709e+06	395356	638150	522978	235345	682230	527204	1.46792e+06	1.92421e+06	571734	1.13959e+06		1.26e+06	199826	138069	325766	3.97666e+06	1.68246e+06	2.10302e+06
LASEILMQNWDAAMEDLTR	1xOxidation [M14]	0.000102231	0.000276662	1	1	1	P60228	P60228 [173-191]		0	2223.04	432982																				95262.1
IAQYYYTFK		0.0013236	0.000276662	1	1	1	P05160	P05160 [35-43]		0	1196.6			460259							298373						133542		265828	459244				291595							109461						121960		120459
IAQWQSFQLEGGLK		1.88593e-13	0.000276662	1	1	9	P01023	P01023 [175-188]		0	1604.84	65739.2	273213	4.40163e+06		861692	156303	970032	1.02836e+06	838990	3.02587e+06		6.11951e+06			1.35162e+06	6.72493e+06	73855		4.0735e+06		14463.5	75905.7	2.78864e+06		257190	20217.7	382328	326145	288743	1.11007e+06		1.66654e+06			229818	6.1417e+06	39674.5
LAQMFSDMVLK	2xOxidation [M4; M8]	7.92475e-06	0.000276662	1	1	2	P02786	P02786 [429-439]		0	1314.64	979683	313430			829384			2.9833e+06	330088	517898		269294			262546	335351			1.03771e+06		215544	87079			247547			946162	113601	189996		73337.6			44641	306268
LALQLHPDRNPDDPQAQEK		0.00106863	0.000276662	1	1	4	Q9UBS4	Q9UBS4 [48-66]		1	2185.1		376795	245534				469550	415390		1.24655e+06						537014	3.26088e+06		629327	1.08101e+06		104683	155557				185068	131742		457309						490441	1.75173e+06
LAQMFSDMVLK	1xOxidation [M]	0.000995979	0.000276662	1	1	4	P02786	P02786 [429-439]		0	1298.65			157914					1.89272e+06								799163		1.97189e+06	1.45197e+06				100046					600280								729856		893555
LAQAAQSSVATITR		2.51522e-17	0.000276662	1	1	17	Q9Y490	Q9Y490 [2044-2057]		0	1416.78	315569	624942	273358		1.11795e+06	232367	2.16245e+06	1.69624e+06	573191			5.57222e+06	6.96468e+06	1.51225e+07	4.39031e+06	887935	809356		1.04433e+06	2.86089e+06	69429.6	173625	173185		333677	30056.6	852306	537965	197267			1517495	1.17577e+06	1.9114e+06	746488	810928	434781
LAPITSDPTEATAVGAVEASFK		4.28616e-12	0.000276662	1	1	5	P14618	P14618 [401-422]		0	2175.12		158448	303112			341452	271605	785425	305859						749804	284700			194390			44021	192035			44166.7	107050	249099	105263						127490	260009
LAPLAEDVR		2.5222e-05	0.000276662	1	1	34	P06727	P06727 [267-275]		0	983.552	8.85843e+06	1.83344e+07	1.23138e+07	3.35738e+06	6.33517e+06	8.44607e+06	1.39906e+07	3.12501e+07	1.72676e+07	1.51097e+07		2.65134e+07	5.98904e+06	5.7254e+06	5.03641e+06	3.91223e+06	1.09682e+07	4.15057e+06	1.58327e+07	5.47155e+07	1.94898e+06	5.09376e+06	7.80136e+06	392265	1.89087e+06	1.09249e+06	5514234	9.91104e+06	5.94276e+06	5.54314e+06		7.22045e+06	1011065	723661	856345	3.57294e+06	5.89204e+06	1.88082e+06
LANVVFFPR		1.85581e-06	0.000276662	1	1	4	Q9GZP0	Q9GZP0 [287-295]		0	1062.61	172832	322495	74923		268273	275639	203915	195533	355975	229951		76590.8		260813	106032	128252	148264		73697.6	364010	38025.5	89597.5	47467.1		80071.8	35653.8	80370.9	62013.7	122511	84359.8		20858.1		32965.4	18028.7	117129	79646.8
IANVFTNAFR		8.76933e-09	0.000276662	1	1	3	P05164	P05164 [490-499]		0	1152.62	128189	140625		213712	212107	435787		7.25867e+06	295256			3.30015e+06		237512	203643	900332	1.45264e+06		4.69562e+06	163213	28203.3	39069.3		24969.5	63307.9	56368.8		2.30211e+06	101614			898738		30020.3	34625.6	822250	780351
IANLQTDLSDGLR		1.22833e-14	0.000276662	1	1	4	P21333	P21333 [64-76]		0	1415.75	1.02656e+07	1.40576e+07	4.73979e+07	3.39979e+06	4.95401e+06	1.32918e+06	1.99478e+07	1.58198e+07	2.97583e+07	2.17203e+07		2.83698e+07		9.53151e+06	1.65498e+07	1.01786e+08	3.35634e+07		5.83906e+07	7.82726e+06	2.25858e+06	3.90558e+06	30028730	397221	1.47863e+06	171928	7862203	5.01728e+06	10241485	7.9683e+06		7.72601e+06		1.20473e+06	2.81397e+06	92958760	18030076
IAQLEEQLDNETK		3.87375e-14	0.000276662	1	1	11	P35579	P35579 [1816-1828]		0	1530.76	458918	1.31181e+06	441348	283425		849792	382774	1.29422e+06	528889	393893		1.73284e+06		1.13298e+06	1.41618e+06	847687	306152		1.40124e+06	1.09308e+06	100968	364455	279614	33114.4		109920	150866	410465	182020	144503		471910		143202	240795	774171	164463
LFAVAPNQNLK		1.73934e-11	0.000276662	1	1	19	P12110	P12110 [187-197]		0	1214.69	4.4698e+06	4.78309e+06	3.0805e+06	1.87781e+06	2.3223e+06	4.82826e+06	3.62762e+06	5.11729e+06	5.20221e+06	2.7767e+06		4.89672e+06	2.5964e+06	3.08469e+06	2.4962e+06	1.29766e+06	3.16662e+06	3.7555e+06	2.00729e+06	4.39699e+06	983419	1.32887e+06	1.95164e+06	219397	693140	624533	1.42979e+06	1.62296e+06	1.79037e+06	1.01866e+06		1.33353e+06	438322	389889	424431	1.18512e+06	1.70109e+06	1.70179e+06
LDEVKEQVAEVR		3.10329e-17	0.000276662	1	1	22	P02649	P02649 [247-258]		1	1414.75	2.04483e+06	9.42186e+06	8.83582e+06	904878	852594	899536	4.79811e+06	4.80643e+06	5.44698e+06	2.67107e+06		7.38063e+06	1.11276e+06	1.33619e+06	723765	5.61549e+06	9.8916e+06	2.04059e+06	6.76226e+06	4.97496e+06	449892	2.61764e+06	5.5979e+06	105723	254475	116354	1.89112e+06	1524371	1.87461e+06	979906		2.00999e+06	187856	168888	123062	5.12848e+06	5.31371e+06	924686
LDFSSQADLRNEIK		1.18791e-13	0.000276662	1	1	6	P04114	P04114 [2898-2911]		1	1635.83	421411	697338	1.07674e+06	310495	382570		358090	854039	1.03581e+06	961431		1.31969e+06		532223	259411	1.01777e+06	552263		766199	776182	92716.4	193739	682162	36277.3	114186		141137	270860	356481	352710		359394		67270.3	44107.9	929500	296673
LEGPGEQETK		3.67514e-06	0.000276662	1	1	2	Q99808	Q99808 [240-249]		0	1087.53	175577		174734				123088	533560	246484	226161		346484		471844	85970.8	238202			501524	593243	38629.4		110702				48513.7	169220	84828.9	82969.1		94358.7		59638.6	14617.7	217544
IEGNLIFDPNNYLPK		3.1766e-11	0.000276662	1	1	13	P04114	P04114 [655-669]		0	1746.91	2.79554e+06	5.99789e+06	2.15257e+07	882768	2.8208e+06	1.43166e+06	1.02566e+07	6.73115e+06	9.47672e+06	8.10603e+06				2.63916e+06	5.72325e+06	1.66925e+07	6.50896e+06		9157077	783153	615058	1.66637e+06	13637535	103140	841929	185184	4042528	2134800	3261464	2.97377e+06				333576	973129	15244805	3.49658e+06
LEGLTDEINFLR		6.29036e-13	0.000276662	1	1	3	P05787	P05787 [214-225]		0	1419.75
LEGLEDALQK		1.06868e-09	0.000276662	3	3	11	P04259; P02538; P48668	P04259 [427-436]; P02538 [427-436]; P48668 [427-436]		0	1115.59	4.6642e+06	1.28519e+06	2.19717e+06	725674	1.67706e+06	7.82458e+06	3.28847e+06	610454	1.14111e+06	1.17469e+06		543382	1.10294e+07	8.5998e+06	4.09144e+06	481925	6.04296e+06	952923	625459	1.30023e+06	1.02619e+06	357059	1.39201e+06	84785.4	500555	1.01211e+06	1.29612e+06	193607	392719	430948		147981	1.86197e+06	1.08697e+06	695672	440130	3.24624e+06	431815
LEGEVFFATR		2.40811e-09	0.000276662	1	1	9	P16112	P16112 [576-585]		0	1168.6	915349			620001		195853		637255				1.95933e+06	226088		316457	134374	310615		318414	5.36831e+06	201390			72439		25333.4		202107				533588	38168		53807.6	122720	166860
IEGEGSVLQAK		4.09263e-06	0.000276662	1	1	1	Q14764	Q14764 [735-745]		0	1130.61	115617	147379		185661	113063	250185		1.02056e+06	225033			627389		174095	409675	247711	646569	520774	299730	162681	25437.4	40945.8		21692	33746	32361.3		323673	77446.5			170858		22004.7	69657.4	226228	347333	235987
LEGSGSYNK		3.61315e-05	0.000276662	1	1	12	A0A075B6I1	A0A075B6I1 [71-79]		0	954.453	1.25598e+07	2.14001e+06	4.10562e+06	9.88873e+06	1.73315e+07		5.6299e+06	7.34624e+06		8.52986e+06	2.71284e+07	950706	4.98952e+06	5.85003e+06	1.77452e+06	6.03537e+06	3.19271e+06	3.36454e+06	23790098	5.03716e+06	2763321	594550	2.6011e+06	1.15537e+06	5.17297e+06		2.21897e+06	2329877		3.12926e+06	1.02712e+06	258908	842326	739414	301723	5511951	1.71511e+06	1.52463e+06
LEFTAHVLSQK		1.8816e-10	0.000276662	1	1	1	Q6UX06	Q6UX06 [102-112]		0	1272.69
LEEQAQQIR		4.65146e-09	0.000276662	1	1	59	P02649	P02649 [261-269]		0	1114.59	2.26108e+08	6.09611e+08	3.77568e+08	5.81744e+07	3.33574e+07	6.17622e+07	3.00948e+08	2.0373e+08	2.27191e+08	1.46815e+08	3.1348e+07	2.21546e+08	1.06826e+08	7.46264e+07	3.75913e+07	2.20457e+08	3.24855e+08	1.1201e+08	1.82829e+08	2.2106e+08	4.97469e+07	1.69366e+08	2.39207e+08	6.79691e+06	9.95623e+06	7.98891e+06	1.18616e+08	6.46136e+07	7.8189e+07	5.38604e+07	1.18688e+06	6.03341e+07	1.80343e+07	9432399	6.39169e+06	2.01337e+08	1.7451e+08	5.07572e+07
LEELENLVSSLR		3.50108e-16	0.000276662	1	1	19	P24821	P24821 [126-137]		0	1401.76							484926	1.51741e+06	587050	803511					3.12268e+06		126602										191129	481250	202037	294776					530952		68009.8
IEEGLDQINK		0.000786312	0.000276662	1	1	7	O00161	O00161 [55-64]		0	1158.6	541310	421405	302184	121146	407375	448899	502959	1.22619e+06	557954	347269		743073	2.56231e+06	1.90143e+06	432845	286483	313889		325613	1.15809e+06	119096	117077	191447	14154.3	121590	58064.9	198236	388889	192023	127399		202363	432567	240330	73597	261637	168619
LEDSVTYHCSR	1xCarbamidomethyl [C9]	5.09834e-13	0.000276662	1	1	4	P00751	P00751 [183-193]		0	1366.61	424689	605461	349518	337651	801998	1.67247e+06	2.05355e+06	1.82741e+06	808311	1.98307e+06		3.02278e+06		314110	602282		2.56681e+06	6.15695e+06	2.85839e+06	5.49832e+06	93437.4	168213	221436	39450	239373	216333	809386	579566	278185	727509		823200		39701.9	102407		1.37887e+06	2.79001e+06
LEDMEQALSPSVFK	1xOxidation [M4]	2.54688e-09	0.000276662	1	1	1	P05155	P05155 [367-380]		0	1609.78
LEDMEQALSPSVFK		7.11333e-15	0.000276662	1	1	4	P05155	P05155 [367-380]		0	1593.78	87228.8	120525			125538	124942	150204	324834	127731	266858		957654	275236		619435	995105	375577	584780	533754	200154	19191.6	33485.1			37469.5	16161.1	59201.4	103022	43959.5	97899.3		260800	46465.1		105323	908804	201758	264992
IEFEWNTGTNVDTK		5.22823e-09	0.000276662	1	1	2	P04114	P04114 [1174-1187]		0	1653.78			327841									278890				519528			173826				207702									75950.6				474472
IEDLPTMVTLGNSFLHK	1xOxidation [M7]	3.68862e-23	0.000276662	1	1	80	P04275	P04275 [1854-1870]		0	1930.99	6.15847e+06	1.24313e+07	2.9544e+07	2.2743e+06	6.53344e+07	2.29232e+07	3.55947e+07	6.24375e+07	7.10516e+07	1.04315e+08	3.4216e+06	5.34885e+07		1.02012e+07	2.66863e+07	1.68608e+08	1.45197e+07	1.73348e+08	9.15679e+07	7.81682e+06	1.35495e+06	3.45374e+06	1.87175e+07	265722	1.95005e+07	2.9651e+06	1.40293e+07	1.98022e+07	2.44528e+07	3.82691e+07	129547	1.45666e+07		1.28938e+06	4.53749e+06	1.53986e+08	7.79992e+06	7.85522e+07
LELELRPTGEIEQYSVSATYELQR		4.27966e-22	0.000276662	1	1	1	P04114	P04114 [1001-1024]		0	2824.44			81188													302981			96245.3				51436.3													276705
LEIQEAQVSDK		0.000223293	0.000276662	1	1	3	Q8NDA2	Q8NDA2 [3096-3106]		0	1259.65	320080	346574		196050	421699	574337	817165	360192	164300	189125		118354		263228	64892.2	242294	319828		246895	1.06947e+06	70422	96287.2		22905.9	125865	74290.2	322077	114236	56544.7	69382.1		32231.7		33270.7	11033.7	221281	171810
IETSYMDGTNR		4.78364e-05	0.000276662	1	1	2	P14543	P14543 [1090-1100]		0	1286.57		92411.4					83181.7	81482.1	54343.1	47419.4		138373				180778	52015.5			199220		25674.3					32785.2	25842.2	18702.5	17396.2		37683.6				165100	27942.4
IETISHEDLQR		1.23216e-12	0.000276662	1	1	34	P07225	P07225 [592-602]		0	1340.68	7.43752e+07	1.00308e+08	9.27303e+07	7.06674e+07	9.09058e+07	7.15178e+07	7.19606e+07	7.48026e+07	6.15722e+07	6.01896e+07		8.3679e+07	8.39331e+07	6.16461e+07	1.2397e+08	5.81779e+07	4.66787e+07	4.17173e+07	74939430	3.98086e+07	1.63636e+07	2.78683e+07	5.87489e+07	8.25655e+06	2.71328e+07	9.25079e+06	28362494	2.37238e+07	2.11904e+07	2.20811e+07		2.27885e+07	1.41695e+07	7.79176e+06	2.10787e+07	5.31324e+07	2.50755e+07	1.89041e+07
LETLDKNNVLAIR		4.31965e-16	0.000276662	1	1	10	Q6UX06	Q6UX06 [201-213]		1	1498.86	346943	1.47419e+06	495062	440218	582355	793698	1.15587e+06	2.2885e+06	1.46942e+06	883392		7.31067e+06		726257	620151	1.37916e+06	1.74874e+06	302363	2.21627e+06	2.02598e+06	76332.3	409569	313644	51433.7	173816	102664	455574	725802	505709	324081		1.99093e+06		91795.1	105445	1.25955e+06	939414	137015
LESEETMVLEAHDAQGDVPVTVTVHDFPGK	1xOxidation [M7]	0.000420386	0.000276662	1	1	1	P01024	P01024 [36-65]		0	3266.55																377086			109667																	344383
LESDVSAQMEYCR	1xCarbamidomethyl [C12]; 1xOxidation [M9]	4.24638e-18	0.000276662	1	1	15	P02675	P02675 [212-224]		0	1603.67	1.46158e+06		312399	1.43692e+06	1.43971e+06	1.89947e+06	556446	1.3556e+06	731417	509966	48093.7	4.16449e+06		293720	3.13439e+06	5.45979e+06	146947	4.1553e+07	5.08297e+06	1.52462e+06	321569		197919	167885	429711	245695	219317	429933	251721	187086	1820.89	1.13412e+06		37124.7	532944	4.98629e+06	78939	1.88296e+07
LESDVSAQMEYCR	1xCarbamidomethyl [C12]	3.69137e-18	0.000276662	1	1	32	P02675	P02675 [212-224]		0	1587.68	102858	58166.5	536950	661004	2.41399e+06	506515	754135	2.05255e+06	347539	931917		2.9784e+06	259567	510178	3.97537e+06	1.46214e+07	811719	9.00962e+07	1.0168e+07	2.67181e+06	22630.1	16160.2	340183	77229.5	720507	65517.4	297234	650971	119607	341883		811114	43819.9	64483.9	675936	1.33534e+07	436051	4.08269e+07
IEIPLPFGGK		2.61329e-08	0.000276662	1	1	15	P04114	P04114 [1296-1305]		0	1070.62	8.14377e+07	9.67777e+07	4.65795e+08	2.37078e+07	5.42515e+07	2.03414e+07	1.47005e+08	1.12989e+08	2.49415e+08	1.32557e+08		1.69305e+08	1.53983e+08	1.2778e+08	8.27502e+07	3.6339e+08	2.19834e+08		1.88056e+08	6.58478e+07	1.79174e+07	2.68873e+07	2.95103e+08	2.76994e+06	1.61925e+07	2.63115e+06	5.79403e+07	3.58347e+07	8.58374e+07	4.86298e+07		4.61073e+07	2.59952e+07	1.61508e+07	1.40701e+07	3.31875e+08	1.18094e+08
LEQQLVHVERPILR		8.78258e-05	0.000276662	1	1	2	Q9ULA0	Q9ULA0 [150-163]		0	1730.01										248082						862548			271640											91011.1						787743
LEQEIATYR		2.44592e-07	0.000276662	5	8	13	P02533; P19012; P13646; Q04695; P08779	P02533 [408-416]; P19012 [399-407]; P13646 [398-406]; Q04695 [377-385]; P08779 [410-418]		0	1122.58	3.17534e+07	1.45337e+07	7.22144e+06	6.01176e+07	1.49701e+07	6.48123e+07	1.62754e+07	9.35192e+06	6.24587e+06	1.14383e+07	8.09597e+06	4.58924e+06	47618.4	4.70934e+07	2.44076e+07	3.95035e+06	1.95476e+07	6.10804e+06	3.92345e+06	1.37181e+07	6.98619e+06	4.03784e+06	4.57511e+06	7023943	4468136	8.38344e+06	6.41479e+06	2.96598e+06	2.14955e+06	4.19626e+06	306525	1.2498e+06	8038.9	5952367	4.15005e+06	3.60776e+06	1.05009e+07	2.76784e+06
LEPLKLHVAGNLK		1.31756e-07	0.000276662	1	1	3	P04114	P04114 [1816-1828]		1	1431.87	362179	953142	1.59724e+06		462845	125405	605437	1.0321e+06	1.10351e+06	836012		922889		344360	213492	1.21298e+06	442322		524844	540164	79684.4	264807	1.01192e+06		138146	16221	238627	327333	379779	306699		251333		43525.4	36300.3	1.10779e+06	237613
LENYIVENMK		1.22692e-05	0.000276662	1	1	3	Q15389	Q15389 [100-109]		0	1252.62	1.23679e+06	2.26493e+06	506637	243401			669641	669245	380579	468770	440025	503096			652381	1.96022e+06	1.79422e+06		1.8585e+06	1.63453e+06	272110	629255	320977	28438.2			263932	212253	130978	171973	16660	137009			110925	1.79022e+06	963846
LENEIQTYR		3.61485e-09	0.000276662	1	1	24	P13645	P13645 [442-450]		0	1165.58	1.85263e+08	1.28746e+08	2.45846e+07	9.79142e+08	6.34388e+07	4.87121e+08	9.54855e+07	8.49023e+07	1.10756e+08	9.92997e+07	5.62173e+07	4.51384e+07	2.52174e+08	2.682e+08	1.81892e+08	2.59808e+07	8.27413e+07	4.89207e+07	2.99967e+07	8.29718e+07	40760352	3.57689e+07	1.55755e+07	1.144e+08	1.89347e+07	6.30089e+07	37634604	2.6927e+07	38117136	36429028	2.12847e+06	12292634	42571796	3.38991e+07	3.09273e+07	23727584	4.44482e+07	2.21683e+07
LELSVDGAK		1.70164e-05	0.000276662	2	2	12	P0C0L4; P0C0L5	P0C0L4 [571-579]; P0C0L5 [571-579]		0	931.509	2.17048e+06	2.72312e+06	3.34874e+06	2.70453e+06	2.52195e+06	2.25305e+06	2.77191e+06	5.01237e+06	2.80855e+06	2.51514e+06		4.84482e+06		2.47729e+06	4.14495e+06	4.32823e+06	4.1235e+06	4.28772e+06	3.97732e+06	3.46391e+06	477535	756553	2121581	315989	752731	291431	1.09252e+06	1.58969e+06	966578	922704		1.3194e+06		313116	704769	3.95286e+06	2.21512e+06	1.94297e+06
LEIQSQVDSQHVGHSVLTAK		2.07554e-28	0.000276662	1	1	20	P04114	P04114 [2986-3005]		0	2176.14	1.16854e+07	1.51285e+07	1.01619e+08	9.78531e+06	1.25668e+07	2.30644e+06	2.82272e+07	2.5201e+07	3.45063e+07	2.51497e+07		5.84632e+07	9.73361e+06	1.40718e+07	1.01852e+07	1.31971e+08	2.93959e+07	4.88807e+06	6.49899e+07	1.06188e+07	2.57096e+06	4.20309e+06	6.43802e+07	1.14328e+06	3.75084e+06	298337	1.11254e+07	7.99256e+06	1.18755e+07	9.22642e+06		1.59214e+07	1.64322e+06	1.77861e+06	1.73179e+06	120525974	1.57913e+07	2.21502e+06
LEQGENVFLQATDK		6.97103e-19	0.000276662	1	1	48	P02746	P02746 [216-229]		0	1591.8	1.38781e+07	1.7863e+07	1.56145e+07	6.67659e+06	1.22832e+07	8.07086e+06	9.48049e+06	1.00988e+07	1.61643e+07	1.43738e+07	1.16376e+06	1.56586e+07	5.56695e+06	5.66551e+06	2.2837e+07	9.73891e+06	5.76503e+06		1.30574e+07	6.65339e+06	3.05338e+06	4.9628e+06	9.89248e+06	780071	3.66618e+06	1.04396e+06	3.73663e+06	3.20285e+06	5.56303e+06	5.27316e+06	44061.6	4.26433e+06	939808	716091	3.88299e+06	8.8943e+06	3.09694e+06
LDFSSQADLR		7.85266e-10	0.000276662	1	1	38	P04114	P04114 [2898-2907]		0	1151.57	1.11315e+08	1.19692e+08	2.05037e+08	2.05552e+07	4.59582e+07	1.02417e+07	1.01064e+08	9.07566e+07	1.75222e+08	8.90726e+07	321128	1.42577e+08	1.41817e+08	1.44883e+08	4.3793e+07	2.90081e+08	1.06845e+08		1.46223e+08	6.2532e+07	2.44909e+07	3.32535e+07	1.299e+08	2401608	13717218	1324755	3.98335e+07	2.87837e+07	6.03037e+07	3.26771e+07	12158.4	3.88284e+07	23941356	1.83125e+07	7446157	2.64924e+08	5.73967e+07
IEDLPTMVTLGNSFLHK		1.80002e-25	0.000276662	1	1	25	P04275	P04275 [1854-1870]		0	1915	39451.1	2.79738e+06	1.85359e+07	531079	6.27325e+07	3.02131e+06	4.29666e+07	6.15798e+07	3.67025e+07	7.88767e+07		146242		1.4002e+06	7.71783e+06	3.10814e+08	1.13192e+07	2.0801e+08	2.97613e+08	2.90315e+06	8679.79	777185	1.17434e+07	62049.5	1.87239e+07	390804	16934836	1.95302e+07	1.26314e+07	2.89367e+07		39826.5		176978	1.31227e+06	2.83859e+08	6080590	94259345
IEDGVPQHLVLVLGGK		1.22504e-08	0.000276662	1	1	5	P12111	P12111 [1536-1551]		0	1673.96	257221	565940	1.10516e+06	277306	519211	724920	849084	1.34806e+06	1.27163e+06	940020		1.15363e+06		220541	301312	823189	596214	1.37262e+06	757450	236505	56592.3	157233	700172	32399.6	154969	93768.1	334657	427542	437637	344855		314170		27875.2	51232.4	751797	320283	621997
LDQVVESPAIPR		1.71907e-07	0.000276662	1	1	5	P16157	P16157 [850-861]		0	1323.73												697217	1.51274e+06	946812			352226															189875	255380	119672			189214
IDQTVEELRR		1.17019e-07	0.000276662	1	1	5	P06727	P06727 [212-221]		1	1258.67	1.09262e+07	3.28901e+07	1.83596e+07	3.869e+06	8.4698e+06	1.11813e+07	2.11923e+07	3.14758e+07	1.8954e+07	2.08161e+07		3.33935e+07	1.07145e+07	7.10427e+06	6.00267e+06	5.00424e+06	1.35472e+07	4.0521e+06	20712670	7.2574e+07	2403908	9137711	11631619	452041	2.52799e+06	1.4463e+06	8352702	9.98261e+06	6.52311e+06	7.63657e+06		9.09413e+06	1.80882e+06	897943	1.02064e+06	4570249	7.27748e+06	1.8362e+06
IDQTVEELR		2.07269e-06	0.000276662	1	1	14	P06727	P06727 [212-220]		0	1102.57	1.67045e+06	1.66493e+06	1.44261e+06	896542	634893	1.91917e+06	2.177e+06	2.73183e+06	1.63491e+06	1.54177e+06		1.98122e+06		458848	454369	578509	859344		1.50722e+06	4.00508e+06	367523	462560	913962	104749	189497	248244	858041	866407	562665	565613		539551		57996	77256.8	528337	461635
IDQNVEELK		1.39794e-07	0.000276662	1	1	9	P06727	P06727 [190-198]		0	1087.56	9.89744e+06	1.3546e+07	9.74586e+06	2.66265e+06	5.04954e+06	8.19721e+06	1.27255e+07	2.36443e+07	1.14746e+07	1.19714e+07	2.40434e+06	2.56319e+07	3.45716e+07	3.18225e+06	4.11123e+06	3.12173e+06	8.13947e+06	2.1819e+06	13727751	4.33121e+07	2.17758e+06	3.76342e+06	6174449	311095	1.50714e+06	1.0603e+06	5.01563e+06	7498831	3.94905e+06	4.3918e+06	91031.6	6980387	5.83635e+06	402220	699037	2.851e+06	4.37248e+06	988724
IDPSDSYTNYSPSFQGHVTISADK		2.45727e-23	0.000276662	1	1	1	A0A0J9YXX1	A0A0J9YXX1 [70-93]		0	2629.21			199003													918236							126077													838601
LDPGSEETQTLVR		2.91479e-07	0.000276662	1	1	1	P26641	P26641 [402-414]		0	1444.73																356462																				325548
IDSLLENDR		8.00469e-09	0.000276662	1	1	20	P10909	P10909 [159-167]		0	1074.54	6.99639e+07	1.05893e+08	7.09419e+07	3.55578e+07	5.18962e+07	5.08298e+07	8.06825e+07	1.17529e+08	8.26071e+07	9.68306e+07		1.01557e+08	3.95659e+07	4.86352e+07	8.30851e+07	1.24547e+08	1.06929e+08	9.97564e+07	96701464	1.03283e+08	15393036	2.94197e+07	44944916	4.15445e+06	15489526	6.57481e+06	3.18001e+07	37274752	2.84297e+07	35523232		27657298	6.67947e+06	6.14724e+06	1.4127e+07	113745408	5.74418e+07	45204352
LDNIYSSDK		2.65619e-09	0.000276662	1	1	36	P04114	P04114 [1770-1778]		0	1054.51	8.2574e+07	6.0064e+07	2.11985e+08	5.8296e+06	9.45833e+06	6.59993e+06	3.76846e+07	4.51931e+07	1.03794e+08	6.99359e+07	1.31901e+07	8.09761e+07	1.38284e+08	1.29412e+08	4.05601e+07	2.14331e+08	8.41299e+07	3.53872e+07	8.19836e+07	1.11863e+07	1.81674e+07	1.66873e+07	1.34302e+08	681112	2823040	853698	1.4853e+07	1.43331e+07	3.57212e+07	2.56567e+07	499395	2.20524e+07	23345000	1.6357e+07	6.89647e+06	1.95743e+08	4.51941e+07	16035628
LDLLSDTNMVDFAMDVYK	1xOxidation [M]	4.88854e-13	0.000276662	1	1	4	P60228	P60228 [42-59]		0	2105.98	2.94523e+06																				647991
IDLETGENR		0.00025085	0.000276662	1	1	22	Q07954	Q07954 [2079-2087]		0	1046.51	542705	1.69705e+06	737125	959540	813690	931701	1.07478e+06	623243	1.53549e+06	630979		857075	1.14838e+06	2.17528e+06	2.05406e+06	1.30117e+06	484374	521237	914660	2.68199e+06	119403	471484	467002	112110	242863	120515	423613	197663	528448	231481		233409	193869	274944	349253	1.18832e+06	260203	236197
LDIDSPPITAR		6.31013e-11	0.000276662	1	1	11	P14618	P14618 [33-43]		0	1197.65	486314	1.22903e+06	519436	365950	1.17955e+06	301571	1.89648e+06	2.23357e+06	953855			5.51642e+06	851882	1.19296e+07	4.16233e+06	687850	1.17165e+06		860278	2.79617e+06	106996	341457	329086	42756.4	352062	39008	747479	708383	328274			1.5023e+06	143814	1.50784e+06	707725	628196	629404
IDLAVGDVVK		3.56457e-09	0.000276662	1	1	12	Q86UX7	Q86UX7 [581-590]		0	1028.6	160318	554061	526634		278049	348635	421895	823828	378909	335437		1.25885e+06	1.95815e+06	1.49529e+06	1.03028e+06	934034	1.11895e+06		483270	1.14864e+06	35272.1	153933	333647		82989.8	45095.8	166285	261279	130404	123058		342825	330573	188997	175180	853029	601095
IDGSGNFQVLLSDR		3.81987e-14	0.000276662	1	1	3	P04275	P04275 [140-153]		0	1520.77		115892			220172		147351	200488		155085		1.23672e+06				139107			259180			32197.7			65715.1		58076.8	63585.2		56894.5		336800				127043
LDGLCIPLR	1xCarbamidomethyl [C5]	0.00151775	0.000276662	1	1	16	Q07954	Q07954 [1071-1079]		0	1056.59	1.07276e+06	2.20399e+06	1.927e+06	1.44402e+06	1.84679e+06	1.21357e+06	1.13916e+06	1.13007e+06	2.48491e+06	1.35591e+06		1.32248e+06	2.98368e+06	2.16443e+06	2.70398e+06	2.04054e+06	696805		1.18727e+06	1.91994e+06	236022	612326	1220844	168714	551215	156975	448989	358406	855197	497429		360154	503703	273572	459761	1.86357e+06	374320
IDITLSSVK		0.000137514	0.000276662	1	1	25	Q08380	Q08380 [217-225]		0	975.572	1.24432e+07	9.07365e+06	1.76212e+07	3.73421e+07	1.58336e+07	1.5937e+07	1.06415e+07	2.69578e+07	2.49056e+07	1.43726e+07		1.09956e+07	3.74078e+07	2.23982e+07	3.53998e+07	1.78335e+07	9.36717e+06	2.06042e+07	1.2197e+07	9.63963e+06	2.73768e+06	2.5209e+06	1.11639e+07	4.36294e+06	4.72587e+06	2.06145e+06	4.19424e+06	8.54972e+06	8.57139e+06	5.27271e+06		2.99447e+06	6315145	2.83102e+06	6.01906e+06	1.62869e+07	5.03199e+06	9.33672e+06
LEDGVQACHATGCGR	2xCarbamidomethyl [C8; C13]	5.05109e-19	0.000276662	1	1	18	Q9Y6R7	Q9Y6R7 [4841-4855]		0	1630.71	1.27554e+07	6.52308e+06	1.07937e+07	5.32172e+06	7.01926e+06	3.30063e+06	5.31423e+06	6.74102e+06	1.05708e+07	6.63388e+06	295733	8.41941e+06	1.30605e+07	9.29368e+06	6.35469e+06	4.28096e+06	1.12798e+07	4.64e+06	6.87013e+06	4.91281e+06	2806369	1.81228e+06	6.83832e+06	621773	2.09505e+06	426935	2.09455e+06	2.13793e+06	3.63799e+06	2.4337e+06	11196.9	2.29288e+06	2.20486e+06	1.17467e+06	1.08049e+06	3.90969e+06	6.05943e+06	2102604
LDSLVAQQLQSK		1.51552e-14	0.000276662	1	1	15	Q9Y6R7	Q9Y6R7 [1051-1062]		0	1329.74	1.7842e+07	1.10452e+07	1.02577e+07	6.45647e+06	7.62663e+06	3.51394e+06	6.57051e+06	8.81858e+06	1.65092e+07	9.59142e+06		5.54733e+06	1.24014e+07	1.11013e+07	9.92782e+06	4.59664e+06	1.21839e+07	3.44955e+06	6701284	4.78645e+06	3925493	3.06866e+06	6.49872e+06	754353	2.27633e+06	454527	2.5897e+06	2.79683e+06	5.68173e+06	3.5187e+06		1.51072e+06	2.09359e+06	1.40314e+06	1.68804e+06	4.19799e+06	6.54511e+06	1.56315e+06
LDTSEVVFNSK		3.18114e-07	0.000276662	1	1	3	P47929	P47929 [55-65]		0	1238.63	440554	440009		602062	308393	796693	381468	235394						999825							96928.1	122246		70343	92046.4	103052	150352	74655.9						126373
IEDGTLASK		0.0017065	0.000276662	1	1	27	P04114	P04114 [3936-3944]		0	933.489	2.78019e+08	2.00166e+08	3.47697e+08	2.02267e+07	6.61597e+07	2.01636e+07	1.35184e+08	1.22172e+08	2.70337e+08	1.46175e+08	7.07389e+07	2.0267e+08	5.14619e+08	3.53847e+08	7.52278e+07	3.19352e+08	2.02939e+08	5.6152e+07	2.27194e+08	1.13433e+08	6.1168e+07	5.56113e+07	2.20282e+08	2.36322e+06	1.97468e+07	2.60815e+06	5.32812e+07	3.8747e+07	9.30381e+07	5.36255e+07	2.67827e+06	5.51937e+07	8.68775e+07	4.47245e+07	1.27911e+07	2.91656e+08	1.09018e+08	25445138
IEDDNDNAPYFEHR		5.24527e-05	0.000276662	1	1	12	Q08554	Q08554 [232-245]		0	1734.74	2.13086e+06	924336	810999	7.09146e+06	1.06562e+06	3.16426e+06	1.54734e+06	913792	797279	371419		375929		2.02034e+06	1.08801e+06		576481	553541	342153	821069	468820	256804	513805	828543	318056	409295	609868	289811	274388	136258		102378		255361	184995		309682	250836
IEDAQVQDTGR		8.07576e-10	0.000276662	1	1	4	Q96RW7	Q96RW7 [2161-2171]		0	1231.59			124235		118892	105625	159611	139562	152396	203840		225552		141554	198137	241529	130269			325668			78708.7		35485.9	13662.5	62909.1	44262.4	52448	74780.7		61425.1		17891.8	33689.4	220582	69979.6
IEDANLIPPVPDDKFQDLVDAVR		3.64003e-18	0.000276662	1	1	4	P07996	P07996 [61-83]		1	2579.34
IECVSAETTEDCIAK	2xCarbamidomethyl [C3; C12]	1.75161e-20	0.000276662	1	1	24	P02787	P02787 [385-399]		0	1725.77	1.31186e+06	1.71059e+06	1.45084e+06	1.85636e+06	7.13583e+06	1.1914e+07	9.54901e+06	2.00416e+07	3.27706e+06	9.41905e+06		7.9934e+06		931161	4.32318e+06	1.32593e+06	3.81355e+06	8.55009e+06	4.5702e+06	1.45512e+07	288627	475247	919173	216892	2.12984e+06	1541064	3.76364e+06	6.35625e+06	1.12782e+06	3.45547e+06		2.17686e+06		117694	735074	1.21094e+06	2.04862e+06	3.87445e+06
IECDDKGDGSCDVR	2xCarbamidomethyl [C3; C11]	2.16451e-10	0.000276662	2	2	8	P21333; Q14315	P21333 [621-634]; Q14315 [616-629]		1	1625.65	256277	457256	230707	69100.5	445075	254791	1.14298e+06	568149	214350	167934		1.51315e+06	7.49382e+06	4.95628e+06	1.83116e+06	1.13433e+06	378349	242051	793196	894249	56384.5	127038	146163	8073.48	132842	32957	450492	180190	73769.7	61608.2		412080	1.2651e+06	626448	311354	1.03596e+06	203247	109685
LDSTDFTGTIK		1.42962e-11	0.000276662	1	1	8	P02786	P02786 [135-145]		0	1197.6	557733	584613	1.89939e+06	212493		214293		1.37467e+07	1.38728e+06	875362		1.03261e+06		467118	834149	2.86563e+06		417762	1.00963e+07	3.91847e+06	122709	162420	1.20335e+06	24827		27718.6		4.35979e+06	477439	321135		281214		59041.3	141831	2.6171e+06		189308
LEAVSHTSDMHR		8.58754e-11	0.000276662	1	1	4	Q01518	Q01518 [18-29]		0	1382.65		191730	491689	201635	68962.4	167908	300237	1.06942e+06	271763			279753		374859	63782.7	333400	931941	193354	51493.6	957383		53267.6	311508	23558.3	20583.3	21718.8	118335	339170	93528.9			76185.9		47380.2	10845	304486	500634	87617.8
LEAAVAQSEQQGEAALSDAR		1.75574e-06	0.000276662	1	4	1	O43790	O43790 [346-365]		0	2043.99						3.52218e+06																				455592
IEAASMSGAGR	1xOxidation [M6]	1.5819e-09	0.000276662	1	1	7	Q07954	Q07954 [1413-1423]		0	1065.5	537747	755363	311873	638875	548138	494585	501562	289119	680729	279367	2.69717e+06	461805	2.099e+06	1.30971e+06	2.02195e+06	599189				1.18201e+06	118312	209859	197586	74644.1	163604	63974.4	197685	91694.7	234277	102488	102119	125764	354352	165541	343794	547224
IEAASMSGAGR		2.91479e-07	0.000276662	1	1	6	Q07954	Q07954 [1413-1423]		0	1049.5	382936	771049	408803		607086		576545		542385			662125				1.03138e+06	201794		536656		84251.2	214217	258996		181198		227239		186665			180318				941931	108403
LDVTTSIGR		5.49105e-05	0.000276662	1	1	46	P04114	P04114 [3690-3698]		0	961.531	1.17139e+08	8.53916e+07	2.35846e+08	1.1782e+07	4.11254e+07	1.02726e+07	7.93903e+07	8.39126e+07	1.56442e+08	7.93635e+07		1.50775e+08	1.88953e+08	1.89401e+08	4.42073e+07	2.84682e+08	1.34501e+08	3.28895e+07	1.68351e+08	5.36674e+07	2.57722e+07	23724009	1.49419e+08	1.37658e+06	1.22747e+07	1.32875e+06	3.12908e+07	2.66131e+07	5.38404e+07	2.91152e+07		4.1061e+07	3.18989e+07	2.39394e+07	7.51661e+06	2.59993e+08	7.22534e+07	1.49038e+07
LDVQFSGLTK		1.6188e-05	0.000276662	1	1	6	P21333	P21333 [907-916]		0	1107.6	429675	376305			261591		563662	555277	182462	181045		1.41534e+06	7.10598e+06	4.73915e+06	2.73606e+06	564052	248323		416216	1.20479e+06	94534.6	104547			78077.5		222161	176108	62795.4	66418.2		385442	1.19962e+06	599004	465214	515134	133398
LDTVAGGLQGLR		3.20854e-05	0.000276662	1	1	1	Q9Y6C2	Q9Y6C2 [737-748]		0	1199.67			133438								364392			360317	455860	540104			123427	293090			84538.9								13796.4			45542.2	77510.3	493264
LEACESLTR	1xCarbamidomethyl [C4]	0.000162175	0.000276662	1	1	5	Q04756	Q04756 [364-372]		0	1078.52	1.39765e+06	536225	852473	475384	583892	336189	784325	726079	398789	753627		496575		368805	801934	730729	526808	276457	1.18995e+06	2.03079e+06	307502	148977	540081	55542.3	174275	43485.9	309133	230278	137245	276475		135233		46615.1	136354	667356	282998	125276
QIQVSWLR		0.0013578	0.000276662	1	1	27	P01871	P01871 [143-150]		0	1029.58	1.32735e+08	1.22217e+08	1.97549e+08	8.73741e+07	3.05844e+08	5.63958e+07	1.34274e+08	1.61446e+08	1.0996e+08	1.81349e+08		1.26814e+08	1.22916e+08	6.14403e+07	1.11826e+08	1.20792e+08	1.32014e+08	7.00326e+07	195242444	6.78863e+07	2.92037e+07	3.3955e+07	1.25157e+08	1.02085e+07	9.12858e+07	7.29476e+06	5.29225e+07	5.1203e+07	3.78435e+07	6.65296e+07		3.45354e+07	20750558	7.76574e+06	1.9014e+07	1.10316e+08	7.09174e+07	3.17351e+07
QISNLQQSISDAEQR		6.07418e-22	0.000276662	1	1	34	P04264	P04264 [418-432]		0	1716.85	1.15912e+08	8.13555e+07	4.82477e+07	1.78395e+08	5.77826e+07	2.27513e+08	7.16246e+07	4.08345e+07	9.92689e+07	3.96213e+07		2.12889e+07	1.41549e+08	1.75007e+08	7.26059e+07	1.83197e+07	4.48484e+07	2.89732e+07	2.89318e+07	4.80711e+07	2.55022e+07	2.26027e+07	3.05671e+07	2.08431e+07	1.72465e+07	2.94287e+07	2.82301e+07	1.29508e+07	3.41639e+07	1.45354e+07		5.79764e+06	2.38961e+07	2.212e+07	1.23453e+07	1.67309e+07	2.40923e+07	1.31291e+07
QLSSDAEAQK		7.04067e-05	0.000276662	1	1	1	Q12888	Q12888 [874-883]		0	1076.52												81798.8						679167														22276.5						307763
VHSPSGALEECYVTEIDQDKYAVR	1xCarbamidomethyl [C11]	3.1106e-20	0.000276662	1	1	2	P21333	P21333 [2368-2391]		1	2766.3			330985					767882				1.00613e+06				814731			565495				209694					243536				274002				744073
VHTECCHGDLLECADDR	3xCarbamidomethyl [C5; C6; C13]	4.33354e-32	0.000276662	1	1	40	P02768	P02768 [265-281]		0	2086.84	3.33852e+06	5.54434e+06	2.79009e+06	3.97335e+06	1.53566e+07	1.65656e+07	3.50322e+07	3.36856e+07	1.12535e+07	2.28147e+07		2.50477e+07	3.43686e+06	2.98838e+06	1.45612e+06	2.93515e+06	2.70176e+07	4.61715e+07	1.36616e+07	4.0846e+07	734522	1.54036e+06	1.76765e+06	464234	4.5835e+06	2.14275e+06	1.38076e+07	1.06835e+07	3.87296e+06	8.3698e+06		6.82131e+06	580208	377716	247586	2.68059e+06	1.45137e+07	2.09225e+07
VHTECCHGDLLECADDRADLAK	3xCarbamidomethyl [C5; C6; C13]	1.79157e-19	0.000276662	1	1	24	P02768	P02768 [265-286]		1	2585.12		6.72785e+06	8.21355e+06		3.11509e+07	1.50089e+07	6.30463e+07	6.76246e+07	2.09266e+07	4.62792e+07		4.57872e+07	4.13885e+06	216156		7.98888e+06	8.08217e+07	1.1922e+08	3.50343e+07	6.19999e+07		1.86917e+06	5.20366e+06		9.29764e+06	1.94139e+06	2.48491e+07	2.14473e+07	7.20201e+06	1.6978e+07		1.24693e+07	698718	27321		7.29604e+06	4.3417e+07	5.40242e+07
VKDLATVYVDVLK		6.02695e-18	0.000276662	1	1	14	P02647	P02647 [35-47]		1	1462.85	1.40109e+06	1.23204e+07	4.46784e+07	3.7708e+06	5.93384e+06	1.65944e+06	1.28982e+07	1.12775e+07	1.46283e+07	1.27929e+07		5.51231e+07		3.48469e+06	1.05047e+07	2.39896e+07	6.21225e+06	22168.1	1.01559e+07	4.22358e+06	308260	3.42292e+06	28305787	440569	1.77108e+06	214648	5083686	3.57667e+06	5.03441e+06	4.69318e+06		1.50118e+07		440447	1.78612e+06	2.19091e+07	3337186	10045.4
VKEEVFIQQR		2.78521e-10	0.000276662	1	1	43	P04275	P04275 [2536-2545]		1	1275.71	3.73368e+08	5.46293e+08	1.59873e+08	1.715e+08	6.53916e+08	9.3763e+08	4.77349e+08	5.12559e+08	6.75636e+08	7.41565e+08	830142	4.31645e+08	6.77253e+07	5.70277e+08	4.46052e+08	6.20656e+08	1.74637e+08	1.02552e+09	5.7969e+08	5.0819e+08	8.21462e+07	1.51774e+08	1.01287e+08	2.00375e+07	1.95175e+08	1.21282e+08	1.88142e+08	1.62559e+08	2.32524e+08	2.7205e+08	31430.4	1.17551e+08	1.14333e+07	7.208e+07	7.58426e+07	5.66829e+08	9.38139e+07	4.6471e+08
VKQELLEEVKK		1.61292e-10	0.000276662	1	1	1	P50552	P50552 [347-357]		2	1342.79	843452		620414		1.22871e+06				1.05718e+06	776045							1.27756e+06		796093	1.26737e+06	185571		393061		366735				363834	284700							686296
VIAAEGEMNASR		2.46096e-13	0.000276662	1	1	13	P27105	P27105 [221-232]		0	1247.6	382296	262475	147883		174388		234282	928135	443053	403955		1.74458e+06	738540	2.62094e+06		1.09696e+06	327763	35580.9	1.50337e+06	1.9918e+06	84110.5	72922.4	93690.5		52049.7		92339.7	294360	152479	148195		475105	124680	331273		1.00183e+06	176073	16123.4
VIAAEGEMNASR	1xOxidation [M8]	4.37705e-07	0.000276662	1	1	3	P27105	P27105 [221-232]		0	1263.6	344931	536637			217102		364140	634599	733402	543241		1.48265e+06	550153	3.53847e+06		674376	310056	156665	575852	1.42429e+06	75889.6	149092			64798.6		143522	201265	252404	199293		403774	92876.3	447245		615891	166560	70992.3
VLAPATFYAICQQDSCHQEQVCEVIASYAHLCR	4xCarbamidomethyl [C11; C16; C22; C32]	2.53303e-26	0.000276662	1	1	1	P04275	P04275 [2153-2185]		0	3924.79
VIAPVDEVQISILSSK		1.73391e-13	0.000276662	1	1	3	P16284	P16284 [496-511]		0	1697.97							76159.6			205356						156134			72312.8								30017.5			75336.8						142593
VLCCSDDHCR	3xCarbamidomethyl [C3; C4; C9]	8.53402e-15	0.000276662	1	1	4	Q9HC84	Q9HC84 [1595-1604]		0	1321.51	448640	610735	5.16207e+06	701309	2.67436e+06	531812	142816	523384	282361	576979		388916		687660	3.30408e+06	2.01726e+06	514374		325616	462703	98707	169678	3270406	81938.6	798220	68789.6	56289.6	165992	97176.2	211670		105914		86916.7	561795	1842311	276319
VLCDDVICDETK	2xCarbamidomethyl [C3; C8]	7.25889e-11	0.000276662	1	1	10	P02452	P02452 [68-79]		0	1466.65	1.36854e+06	1.23306e+06	474522	905343	1.38989e+06	2.09382e+06	1.90935e+06	2.1995e+06	1.62234e+06	1.29195e+06		1.32285e+06	4.02716e+06	1.20206e+06	601607	382969	580974	2.03296e+06	470819	4.64381e+06	301099	342576	300631	105777	414842	270835	752550	697577	558336	473965		360255	679862	151934	102292	349756	312096	921228
VIDAEPPVIDWCR	1xCarbamidomethyl [C12]	2.69348e-08	0.000276662	1	1	2	Q4LDE5	Q4LDE5 [642-654]		0	1569.77		73845.6	80084.7				106136	154814		118760		254724			112242	542034	63896.2		334654	162287		20516.2	50737.3				41832.5	49099.5		43568.4		69369.6			19084.6	495026	34324.7
VLDELTLTK		0.000275976	0.000276662	1	1	25	P13645	P13645 [258-266]		0	1031.6	2.49548e+08	1.65453e+08	1.06396e+08	7.82044e+08	1.14866e+08	4.76805e+08	1.69469e+08	9.64511e+07	1.83573e+08	7.54202e+07	88833.7	5.67748e+07	9.03577e+08	6.93896e+08	1.47474e+08	3.6752e+07	1.08712e+08	3.81728e+07	61792386	1.45559e+08	5.4904e+07	45967136	6.74065e+07	9.13715e+07	34284114	6.16745e+07	66794588	30589694	6.31775e+07	2.76686e+07	3363.37	15461627	1.52541e+08	87704900	2.50751e+07	33564636	58399590	1.72979e+07
VLEDRPLSDK		5.15846e-10	0.000276662	1	1	9	P05106	P05106 [89-98]		0	1171.63	498281	1.68011e+06	988655	740108	1.36683e+06	1.24014e+06	1.90744e+06	2.84162e+06	1.46854e+06	1.51671e+06		3.30401e+06	6.52955e+06	9.68537e+06	2.64785e+06	2.16505e+06	1.44188e+06		479944	2.14826e+06	109629	466778	626358	86471.9	407959	160412	751797	901226	505407	556420		899789	1.10231e+06	1.22418e+06	450217	1.97729e+06	774568
VIEGDVVSALNK		4.04349e-09	0.000276662	1	1	11	P48059	P48059 [258-269]		0	1243.69		857640	657904		361684		1.31344e+06	2.05682e+06	866213	318243		2.54738e+06	5.85343e+06	5.39659e+06	2.71895e+06	1.01524e+06	1.37578e+06		1.14716e+06	2.19993e+06		238275	416812		107952		517680	652325	298112	116751		693733	988170	682102	462305	927196	739062
VLETAEDIQER		1.48582e-06	0.000276662	1	1	5	Q13813	Q13813 [8-18]		0	1302.65	136109			493808	63375.6	91125.8	165170	516390	186608	93385.7		607634			368817		264076		162508	100973	29945.8			57695	18915.8	11787.1	65100.1	163774	64222.1	34259.4		165478			62710.4		141860
VILENIASHEPR		5.53269e-10	0.000276662	1	1	11	P02549	P02549 [837-848]		0	1377.75	528656	1.5494e+06	22812.9		618271		1.59061e+06	782130	617733	308878		1.58624e+06	4.1516e+06	3.20892e+06	1.61229e+06		902536		172370	915599	116312	430464	14453		184536		626923	248054	212596	113315		431985	700870	405592	274139		484837
[truncated: 5,475 more rows]
[truncated: 28 more columns]

## Sheet: Supplementary Table 3
			HC										NB
Accession ID	Protein	Gene	HC1	HC2	HC3	HC5	HC6	HC7	HC8	HC9	HC10	HC13	T5	T6	T8	T12	T13	T14	T15	T16	T17	T19
[truncated: 948 more rows]

## Sheet: Supplementary Table 4
Accession ID	Prrotein	Gene	logFC	pvalue	Change
[truncated: 104 more rows]

## Sheet: Supplementary Table 5
Reactome pathways significantly enriched for upregulated proteins
[truncated: 28 more rows]

[truncated: 5 more sheets: Supplementary Table 6, Supplementary Table 7, Supplementary Table 8, Supplementary Table 9, Supplementary Table 10]
